# Supplementary material for: Asgard archaea defense systems and their roles in the origin of eukaryotic immunity
Source: Research Square preprint supplement (doi:10.21203/rs.3.rs-3388778/v1), 2023-10-23
Supplement: Supplementary file 4 [file f0d02fae1383643838c16918.xlsx]

## Sheet: DS_Genes
Group	hit_id	Genome	Taxonomy	gene_name	hit_pos	model_fqn	sys_id	sys_loci	locus_num	sys_wholeness	sys_score	sys_occ	hit_gene_ref	hit_status	hit_seq_len	hit_i_eval	hit_score	hit_profile_cov	hit_seq_cov	hit_begin_match	hit_end_match
Bacteria	MBI5115054.1	GCA_016215705.1	Abyssubacteria	CBASS__Phospholipase	218	defense-finder-models/DefenseFinder_5/CBASS/CBASS_II	UserReplicon_CBASS_II_3	1	1	1	3	1	CBASS__Effector_2TM_S_2TMBeta	mandatory	334	3.4e-91	303.9	0.958	0.973	6	330
Bacteria	MBI5115055.1	GCA_016215705.1	Abyssubacteria	CBASS__E2	219	defense-finder-models/DefenseFinder_5/CBASS/CBASS_II	UserReplicon_CBASS_II_3	1	1	1	3	1	CBASS__E2	mandatory	143	6.4e-48	161.1	0.778	0.944	5	139
Bacteria	MBI5115056.1	GCA_016215705.1	Abyssubacteria	CBASS__Cyclase_II	220	defense-finder-models/DefenseFinder_5/CBASS/CBASS_II	UserReplicon_CBASS_II_3	1	1	1	3	1	CBASS__Cyclase_SMODS	mandatory	389	5.7e-40	135.4	0.902	0.841	22	348
Bacteria	MBI5115104.1	GCA_016215705.1	Abyssubacteria	RM_Type_II__Type_II_REases	268	defense-finder-models/RM/RM/RM_Type_II	UserReplicon_RM_Type_II_4	1	1	1	2	1	RM_Type_II__Type_II_REases	mandatory	269	7.9e-10	37.9	0.508	0.665	38	216
Bacteria	MBI5115105.1	GCA_016215705.1	Abyssubacteria	RM_Type_II__Type_II_MTases	269	defense-finder-models/RM/RM/RM_Type_II	UserReplicon_RM_Type_II_4	1	1	1	2	1	RM_Type_II__Type_II_MTases	mandatory	422	2.9e-41	139.8	1.005	0.91	27	410
Bacteria	MBI5115193.1	GCA_016215705.1	Abyssubacteria	AbiEii__AbiEi_2	357	defense-finder-models/DefenseFinder_1/AbiE/AbiE	UserReplicon_AbiE_1	1	1	1	2	1	AbiEii__AbiEi_1	mandatory	354	6.5e-22	76.4	0.986	0.412	202	347
Bacteria	MBI5115194.1	GCA_016215705.1	Abyssubacteria	AbiEii__AbiEii	358	defense-finder-models/DefenseFinder_1/AbiE/AbiE	UserReplicon_AbiE_1	1	1	1	2	1	AbiEii__AbiEii	mandatory	269	1.4e-10	39.6	0.77	0.758	28	231
Bacteria	MBI5115351.1	GCA_016215705.1	Abyssubacteria	PARIS_I_merge__AAA_15_DUF4435	515	defense-finder-models/DefenseFinder_3/Rst_PARIS/PARIS_I_merge	UserReplicon_PARIS_I_merge_1	1	1	1	1	1	PARIS_I_merge__AAA_15_DUF4435	mandatory	536	2.5e-23	80.5	0.382	0.528	179	461
Bacteria	MBI5115496.1	GCA_016215705.1	Abyssubacteria	RM_Type_IIG__Type_IIG	660	defense-finder-models/RM/RM/RM_Type_IIG	UserReplicon_RM_Type_IIG_8	1	1	1	1	1	RM_Type_IIG__Type_IIG	mandatory	1048	2.4e-165	550.5	0.988	0.948	52	1044
Bacteria	MBI5115753.1	GCA_016215705.1	Abyssubacteria	RM_Type_II__Type_II_MTases	917	defense-finder-models/RM/RM/RM_Type_II	UserReplicon_RM_Type_II_5	1	1	1	2	1	RM_Type_II__Type_II_MTases	mandatory	377	3.3e-112	372.5	0.809	0.78	31	324
Bacteria	MBI5115754.1	GCA_016215705.1	Abyssubacteria	RM_Type_II__Type_II_REases	918	defense-finder-models/RM/RM/RM_Type_II	UserReplicon_RM_Type_II_5	1	1	1	2	1	RM_Type_II__Type_II_REases	mandatory	333	3e-06	24.9	0.336	0.258	196	281
Bacteria	MBI5115864.1	GCA_016215705.1	Abyssubacteria	RM__Type_I_REases	1028	defense-finder-models/RM/RM/RM_Type_I	UserReplicon_RM_Type_I_2	1	1	0.667	2	1	RM__Type_I_REases	mandatory	195	1.5e-23	81.1	0.165	0.826	14	174
Bacteria	MBI5115867.1	GCA_016215705.1	Abyssubacteria	RM__Type_I_MTases	1031	defense-finder-models/RM/RM/RM_Type_I	UserReplicon_RM_Type_I_2	1	1	0.667	2	1	RM__Type_I_MTases	mandatory	174	1.9e-47	160.3	0.305	0.983	2	172
Bacteria	MBI5116173.1	GCA_016215705.1	Abyssubacteria	PD-Lambda-5__PD-Lambda-5_B	1337	defense-finder-models/RM/PD-Lambda-5/PD-Lambda-5	UserReplicon_PD-Lambda-5_1	1	1	1	2	1	PD-Lambda-5__PD-Lambda-5_B	mandatory	280	1.3e-107	357.3	0.945	0.975	2	274
Bacteria	MBI5116174.1	GCA_016215705.1	Abyssubacteria	PD-Lambda-5__PD-Lambda-5_A	1338	defense-finder-models/RM/PD-Lambda-5/PD-Lambda-5	UserReplicon_PD-Lambda-5_1	1	1	1	2	1	PD-Lambda-5__PD-Lambda-5_A	mandatory	453	1.9e-13	47.9	0.304	0.305	9	146
Bacteria	MBI5116238.1	GCA_016215705.1	Abyssubacteria	RM_Type_IIG__Type_IIG	1402	defense-finder-models/RM/RM/RM_Type_IIG	UserReplicon_RM_Type_IIG_9	1	1	1	1	1	RM_Type_IIG__Type_IIG	mandatory	1078	1.2e-103	346.3	0.86	0.889	76	1033
Bacteria	MBI5116298.1	GCA_016215705.1	Abyssubacteria	RM_Type_IIG__Type_IIG	1462	defense-finder-models/RM/RM/RM_Type_IIG	UserReplicon_RM_Type_IIG_10	1	1	1	1	1	RM_Type_IIG__Type_IIG	mandatory	1041	1.9e-223	743	1.2	0.973	20	1032
Bacteria	MBI5116751.1	GCA_016215705.1	Abyssubacteria	SoFic__SoFic	1915	defense-finder-models/DefenseFinder_5/SoFIC/SoFic	UserReplicon_SoFic_4	1	1	1	1	1	SoFic__SoFic	mandatory	404	7.3e-127	421.5	0.983	0.903	18	382
Bacteria	MBI5117758.1	GCA_016215705.1	Abyssubacteria	RM_Type_IIG__Type_IIG	2922	defense-finder-models/RM/RM/RM_Type_IIG	UserReplicon_RM_Type_IIG_11	1	1	1	1	1	RM_Type_IIG__Type_IIG	mandatory	757	2.1e-212	705.7	0.816	0.996	1	754
Bacteria	MBI5117929.1	GCA_016215705.1	Abyssubacteria	RM__Type_I_MTases	3093	defense-finder-models/RM/RM/RM_Type_I	UserReplicon_RM_Type_I_3	1	1	1	2.5	1	RM__Type_I_MTases	mandatory	518	9e-173	573.8	0.979	0.967	16	516
Bacteria	MBI5117930.1	GCA_016215705.1	Abyssubacteria	RM__Type_I_S	3094	defense-finder-models/RM/RM/RM_Type_I	UserReplicon_RM_Type_I_3	1	1	1	2.5	1	RM__Type_I_S	accessory	457	1.6e-61	206.7	0.468	0.906	28	441
Bacteria	MBI5117933.1	GCA_016215705.1	Abyssubacteria	RM__Type_I_REases	3097	defense-finder-models/RM/RM/RM_Type_I	UserReplicon_RM_Type_I_3	1	1	1	2.5	1	RM__Type_I_REases	mandatory	1048	1.3e-243	809.5	0.995	0.979	1	1026
Bacteria	MBI5118494.1	GCA_016215705.1	Abyssubacteria	RM_Type_II__Type_II_MTases	3658	defense-finder-models/RM/RM/RM_Type_II	UserReplicon_RM_Type_II_6	1	1	1	2	1	RM_Type_II__Type_II_MTases	mandatory	456	2.4e-58	196	1.131	0.925	28	449
Bacteria	MBI5118495.1	GCA_016215705.1	Abyssubacteria	RM_Type_II__Type_II_REases	3659	defense-finder-models/RM/RM/RM_Type_II	UserReplicon_RM_Type_II_6	1	1	1	2	1	RM_Type_II__Type_II_REases	mandatory	266	4.6e-38	129.7	0.84	0.895	6	243
Bacteria	MBI5118910.1	GCA_016215705.1	Abyssubacteria	RM_Type_II__Type_II_MTases	4074	defense-finder-models/RM/RM/RM_Type_II	UserReplicon_RM_Type_II_7	1	1	1	2	2	RM_Type_II__Type_II_MTases	mandatory	321	1.3e-65	220.1	0.97	0.991	2	319
Bacteria	MBI5118911.1	GCA_016215705.1	Abyssubacteria	RM_Type_II__Type_II_REases	4075	defense-finder-models/RM/RM/RM_Type_II	UserReplicon_RM_Type_II_7	1	1	1	2	2	RM_Type_II__Type_II_REases	mandatory	723	1.6e-50	171	1.752	0.96	16	709
Bacteria	MBI5118914.1	GCA_016215705.1	Abyssubacteria	RM_Type_II__Type_II_REases	4078	defense-finder-models/RM/RM/RM_Type_II	UserReplicon_RM_Type_II_7	1	1	1	2	2	RM_Type_II__Type_II_REases	mandatory	391	1.2e-26	92.7	1.233	0.801	77	389
Bacteria	MBI5118915.1	GCA_016215705.1	Abyssubacteria	RM_Type_II__Type_II_MTases	4079	defense-finder-models/RM/RM/RM_Type_II	UserReplicon_RM_Type_II_7	1	1	1	2	2	RM_Type_II__Type_II_MTases	mandatory	418	4.1e-110	366	0.842	0.749	67	379
Bacteria	MBI5119305.1	GCA_016215705.1	Abyssubacteria	Gabija__GajB_2	4469	defense-finder-models/DefenseFinder_1/Gabija/Gabija	UserReplicon_Gabija_2	1	1	1	2	1	Gabija__GajB_1	mandatory	480	5.4e-30	102.5	0.695	0.881	41	463
Bacteria	MBI5119306.1	GCA_016215705.1	Abyssubacteria	Gabija__GajA	4470	defense-finder-models/DefenseFinder_1/Gabija/Gabija	UserReplicon_Gabija_2	1	1	1	2	1	Gabija__GajA	mandatory	609	2.1e-44	150.4	0.75	0.782	1	476
Bacteria	RJP17117.1	GCA_003598085.1	Abyssubacteria	RM_Type_II__Type_II_MTases	878	defense-finder-models/RM/RM/RM_Type_II	UserReplicon_RM_Type_II_4	1	1	1	2	1	RM_Type_II__Type_II_MTases	mandatory	355	9.2e-77	256.7	0.984	0.98	4	351
Bacteria	RJP17118.1	GCA_003598085.1	Abyssubacteria	RM_Type_II__Type_II_REases	879	defense-finder-models/RM/RM/RM_Type_II	UserReplicon_RM_Type_II_4	1	1	1	2	1	RM_Type_II__Type_II_REases	mandatory	547	5.7e-70	235.1	1.477	0.921	1	504
Bacteria	RJP17178.1	GCA_003598085.1	Abyssubacteria	RM__Type_I_MTases	935	defense-finder-models/RM/RM/RM_Type_I	UserReplicon_RM_Type_I_1	1	1	0.667	2	1	RM__Type_I_MTases	mandatory	838	4.1e-89	297.3	0.928	0.558	1	468
Bacteria	RJP17179.1	GCA_003598085.1	Abyssubacteria	RM__Type_I_REases	936	defense-finder-models/RM/RM/RM_Type_I	UserReplicon_RM_Type_I_1	1	1	0.667	2	1	RM__Type_I_REases	mandatory	846	6.7e-83	277.4	0.558	0.736	5	627
Bacteria	RJP19131.1	GCA_003598085.1	Abyssubacteria	Cas__cas3_I_5	1684	defense-finder-models/Cas/Cas/CAS_Class1-Subtype-I-C	UserReplicon_CAS_Class1-Subtype-I-C_1	1	1	1	7	1	Cas__cas3_I_5	accessory	723	3.1e-50	169.2	0.456	0.45	229	553
Bacteria	RJP19132.1	GCA_003598085.1	Abyssubacteria	Cas__cas5_I-C_11	1685	defense-finder-models/Cas/Cas/CAS_Class1-Subtype-I-C	UserReplicon_CAS_Class1-Subtype-I-C_1	1	1	1	7	1	Cas__cas5_I-C_11	mandatory	212	7.6e-84	278.5	0.99	0.91	11	203
Bacteria	RJP19133.1	GCA_003598085.1	Abyssubacteria	Cas__cas8c_I-C_2	1686	defense-finder-models/Cas/Cas/CAS_Class1-Subtype-I-C	UserReplicon_CAS_Class1-Subtype-I-C_1	1	1	1	7	1	Cas__cas8c_I-C_4	mandatory	596	9.2e-177	586.9	1	0.977	3	584
Bacteria	RJP19134.1	GCA_003598085.1	Abyssubacteria	Cas__cas7_I-C_7	1687	defense-finder-models/Cas/Cas/CAS_Class1-Subtype-I-C	UserReplicon_CAS_Class1-Subtype-I-C_1	1	1	1	7	1	Cas__cas7_I-C_13	mandatory	293	1e-123	410	0.996	0.969	8	291
Bacteria	RJP19135.1	GCA_003598085.1	Abyssubacteria	Cas__cas4_I_II_III_IV_V_VI_6	1688	defense-finder-models/Cas/Cas/CAS_Class1-Subtype-I-C	UserReplicon_CAS_Class1-Subtype-I-C_1	1	1	1	7	1	Cas__cas4_I_II_III_IV_V_VI_1	accessory	244	2.3e-30	103.8	0.994	0.844	10	215
Bacteria	RJP19136.1	GCA_003598085.1	Abyssubacteria	Cas__cas1_I_II_III_IV_V_VI_6	1689	defense-finder-models/Cas/Cas/CAS_Class1-Subtype-I-C	UserReplicon_CAS_Class1-Subtype-I-C_1	1	1	1	7	1	Cas__cas1_I_II_III_IV_V_VI_6	accessory	343	1.3e-155	515.6	1	0.985	4	341
Bacteria	RJP19137.1	GCA_003598085.1	Abyssubacteria	Cas__cas2_I_II_III_IV_V_VI_3	1690	defense-finder-models/Cas/Cas/CAS_Class1-Subtype-I-C	UserReplicon_CAS_Class1-Subtype-I-C_1	1	1	1	7	1	Cas__cas2_I_II_III_IV_V_VI_3	accessory	96	1.4e-28	96.8	0.987	0.865	3	85
Bacteria	RJP19437.1	GCA_003598085.1	Abyssubacteria	RM__Type_I_S	1796	defense-finder-models/RM/RM/RM_Type_I	UserReplicon_RM_Type_I_2	1	1	1	2.5	1	RM__Type_I_S	accessory	577	5e-89	297.6	0.564	0.891	57	570
Bacteria	RJP19438.1	GCA_003598085.1	Abyssubacteria	RM__Type_I_MTases	1797	defense-finder-models/RM/RM/RM_Type_I	UserReplicon_RM_Type_I_2	1	1	1	2.5	1	RM__Type_I_MTases	mandatory	484	2.3e-185	614.7	0.953	0.977	3	475
Bacteria	RJP19439.1	GCA_003598085.1	Abyssubacteria	RM__Type_I_REases	1798	defense-finder-models/RM/RM/RM_Type_I	UserReplicon_RM_Type_I_2	1	1	1	2.5	1	RM__Type_I_REases	mandatory	783	2.2e-194	646.2	0.569	0.704	4	554
Bacteria	RJP22383.1	GCA_003598085.1	Abyssubacteria	dCTPdeaminase__dCTPdeaminase	2712	defense-finder-models/DefenseFinder_1/dCTPdeaminase/dCTPdeaminase	UserReplicon_dCTPdeaminase_1	1	1	1	1	1	dCTPdeaminase__dCTPdeaminase	mandatory	396	8.2e-63	210.7	0.859	0.97	4	387
Bacteria	RJP24021.1	GCA_003598085.1	Abyssubacteria	Menshen__NsnB	3333	defense-finder-models/DefenseFinder_4/Menshen/Menshen	UserReplicon_Menshen_1	1	1	0.667	2	1	Menshen__NsnB	mandatory	562	2.1e-46	157.1	0.983	0.998	1	561
Bacteria	RJP24027.1	GCA_003598085.1	Abyssubacteria	Menshen__NsnC_2525488910	3339	defense-finder-models/DefenseFinder_4/Menshen/Menshen	UserReplicon_Menshen_1	1	1	0.667	2	1	Menshen__NsnC_2507451963	mandatory	116	3.7e-11	40.7	0.253	0.655	35	110
Bacteria	RJP24480.1	GCA_003598085.1	Abyssubacteria	RM__Type_I_REases	3540	defense-finder-models/RM/RM/RM_Type_I	UserReplicon_RM_Type_I_3	1	1	1	2.5	1	RM__Type_I_REases	mandatory	973	2.6e-124	414.6	0.982	0.97	15	958
Bacteria	RJP24481.1	GCA_003598085.1	Abyssubacteria	RM__Type_I_S	3541	defense-finder-models/RM/RM/RM_Type_I	UserReplicon_RM_Type_I_3	1	1	1	2.5	1	RM__Type_I_S	accessory	406	2.6e-60	202.1	0.574	0.963	7	397
Bacteria	RJP24482.1	GCA_003598085.1	Abyssubacteria	RM__Type_I_MTases	3542	defense-finder-models/RM/RM/RM_Type_I	UserReplicon_RM_Type_I_3	1	1	1	2.5	1	RM__Type_I_MTases	mandatory	605	3.1e-131	436.7	0.98	0.845	92	602
Bacteria	RJP65951.1	GCA_003598055.1	Abyssubacteria	RM__Type_I_MTases	697	defense-finder-models/RM/RM/RM_Type_I	UserReplicon_RM_Type_I_1	1	1	0.667	2	1	RM__Type_I_MTases	mandatory	370	5.4e-104	346.3	0.656	1	1	370
Bacteria	RJP65955.1	GCA_003598055.1	Abyssubacteria	RM__Type_I_REases	701	defense-finder-models/RM/RM/RM_Type_I	UserReplicon_RM_Type_I_1	1	1	0.667	2	1	RM__Type_I_REases	mandatory	1128	2.8e-161	536.6	0.847	0.811	208	1122
Bacteria	RJP68517.1	GCA_003598055.1	Abyssubacteria	RM_Type_III__Type_III_MTases	1521	defense-finder-models/RM/RM/RM_Type_III	UserReplicon_RM_Type_III_2	1	1	1	2	1	RM_Type_III__Type_III_MTases	mandatory	901	2e-77	259.5	0.679	0.562	50	555
Bacteria	RJP68520.1	GCA_003598055.1	Abyssubacteria	RM_Type_III__Type_III_REases	1524	defense-finder-models/RM/RM/RM_Type_III	UserReplicon_RM_Type_III_2	1	1	1	2	1	RM_Type_III__Type_III_REases	mandatory	1001	5.9e-09	32.4	0.169	0.152	156	307
Bacteria	RJP72732.1	GCA_003598055.1	Abyssubacteria	PD-Lambda-1__PD-Lambda-1	2878	defense-finder-models/DefenseFinder_2/PD-Lambda-1/PD-Lambda-1	UserReplicon_PD-Lambda-1_1	1	1	1	1	1	PD-Lambda-1__PD-Lambda-1	mandatory	563	1e-147	490.7	0.885	0.835	66	535
Bacteria	RJP72905.1	GCA_003598055.1	Abyssubacteria	Cas__cmr1gr7_III-B_III-C_3	2975	defense-finder-models/Cas/Cas/CAS_Class1-Subtype-III-C	UserReplicon_CAS_Class1-Subtype-III-C_1	1	1	0.833	5	1	Cas__cmr1gr7_III-B_III-C_3	accessory	384	2.1e-15	55.1	0.509	0.273	12	116
Bacteria	RJP72906.1	GCA_003598055.1	Abyssubacteria	Cas__cmr6gr7_III-C_1	2976	defense-finder-models/Cas/Cas/CAS_Class1-Subtype-III-C	UserReplicon_CAS_Class1-Subtype-III-C_1	1	1	0.833	5	1	Cas__cmr6gr7_III-C_1	mandatory	363	5.3e-72	240.3	0.911	0.661	82	321
Bacteria	RJP72907.1	GCA_003598055.1	Abyssubacteria	Cas__cas10_III-C_3	2977	defense-finder-models/Cas/Cas/CAS_Class1-Subtype-III-C	UserReplicon_CAS_Class1-Subtype-III-C_1	1	1	0.833	5	1	Cas__cas10_III-C_3	mandatory	1054	1e-107	359.2	0.969	0.964	6	1021
Bacteria	RJP72908.1	GCA_003598055.1	Abyssubacteria	Cas__cmr4gr7_III-B_III-C_2	2978	defense-finder-models/Cas/Cas/CAS_Class1-Subtype-III-C	UserReplicon_CAS_Class1-Subtype-III-C_1	1	1	0.833	5	1	Cas__cmr4gr7_III-B_III-C_2	accessory	319	1.7e-38	130.6	0.977	0.947	15	316
Bacteria	RJP72910.1	GCA_003598055.1	Abyssubacteria	Cas__cmr3gr5_III-C_1	2980	defense-finder-models/Cas/Cas/CAS_Class1-Subtype-III-C	UserReplicon_CAS_Class1-Subtype-III-C_1	1	1	0.833	5	1	Cas__cmr3gr5_III-C_1	mandatory	322	7.9e-66	220.1	0.996	0.978	1	315
Bacteria	MYA44773.1	GCA_009840635.1	Acidobacteriota	RM__Type_I_REases	38	defense-finder-models/RM/RM/RM_Type_I	UserReplicon_RM_Type_I_1	1	1	1	2.5	1	RM__Type_I_REases	mandatory	1040	3.3e-245	814.2	0.995	0.978	1	1017
Bacteria	MYA44774.1	GCA_009840635.1	Acidobacteriota	RM__Type_I_S	39	defense-finder-models/RM/RM/RM_Type_I	UserReplicon_RM_Type_I_1	1	1	1	2.5	1	RM__Type_I_S	accessory	545	5.8e-43	144.9	0.468	0.754	119	529
Bacteria	MYA44776.1	GCA_009840635.1	Acidobacteriota	RM__Type_I_MTases	41	defense-finder-models/RM/RM/RM_Type_I	UserReplicon_RM_Type_I_1	1	1	1	2.5	1	RM__Type_I_MTases	mandatory	540	4.1e-175	580.9	0.98	0.946	23	533
Bacteria	MYA45789.1	GCA_009840635.1	Acidobacteriota	SoFic__SoFic	1054	defense-finder-models/DefenseFinder_5/SoFIC/SoFic	UserReplicon_SoFic_1	1	1	1	1	1	SoFic__SoFic	mandatory	347	8.9e-112	371.2	0.942	0.986	2	343
Bacteria	MYA46400.1	GCA_009840635.1	Acidobacteriota	PARIS_I_merge__AAA_15_DUF4435	1665	defense-finder-models/DefenseFinder_3/Rst_PARIS/PARIS_I_merge	UserReplicon_PARIS_I_merge_1	1	1	1	1	1	PARIS_I_merge__AAA_15_DUF4435	mandatory	699	1.3e-137	457.6	0.994	0.99	1	692
Bacteria	MYA46401.1	GCA_009840635.1	Acidobacteriota	RM_Type_II__Type_II_MTases	1666	defense-finder-models/RM/RM/RM_Type_II	UserReplicon_RM_Type_II_2	1	1	1	2	1	RM_Type_II__Type_II_MTases	mandatory	373	1.5e-20	71.2	0.32	0.319	247	365
Bacteria	MYA46402.1	GCA_009840635.1	Acidobacteriota	RM_Type_II__Type_II_REases	1667	defense-finder-models/RM/RM/RM_Type_II	UserReplicon_RM_Type_II_2	1	1	1	2	1	RM_Type_II__Type_II_REases	mandatory	296	3.6e-13	47.2	0.729	0.851	29	280
Bacteria	MYA46470.1	GCA_009840635.1	Acidobacteriota	Dsr_II__Dsr2	1735	defense-finder-models/DefenseFinder_2/Dsr/Dsr_II	UserReplicon_Dsr_II_1	1	1	1	1	1	Dsr_II__Dsr2	mandatory	1251	9e-115	382.2	0.745	0.742	8	935
Bacteria	MYA46508.1	GCA_009840635.1	Acidobacteriota	RM_Type_IV__Type_IV_REases	1773	defense-finder-models/RM/RM/RM_Type_IV	UserReplicon_RM_Type_IV_4	1	1	1	1	1	RM_Type_IV__Type_IV_REases	mandatory	713	5.2e-82	274	0.872	0.457	387	712
Bacteria	MYA47040.1	GCA_009840635.1	Acidobacteriota	SspBCDE__SspD	2305	defense-finder-models/DefenseFinder_4/SspBCDE/SspBCDE	UserReplicon_SspBCDE_1	1	1	0.429	3	1	SspBCDE__SspD	mandatory	265	9.3e-95	314.7	0.897	0.928	2	247
Bacteria	MYA47041.1	GCA_009840635.1	Acidobacteriota	SspBCDE__SspC	2306	defense-finder-models/DefenseFinder_4/SspBCDE/SspBCDE	UserReplicon_SspBCDE_1	1	1	0.429	3	1	SspBCDE__SspC	mandatory	1119	7e-154	511.6	0.984	0.986	6	1108
Bacteria	MYA47042.1	GCA_009840635.1	Acidobacteriota	SspBCDE__SspB	2307	defense-finder-models/DefenseFinder_4/SspBCDE/SspBCDE	UserReplicon_SspBCDE_1	1	1	0.429	3	1	SspBCDE__SspB	mandatory	311	2.3e-32	109.8	0.914	0.913	22	305
Bacteria	MYA47385.1	GCA_009840635.1	Acidobacteriota	AbiEii__AbiEi_1	2650	defense-finder-models/DefenseFinder_1/AbiE/AbiE	UserReplicon_AbiE_1	1	1	1	2	1	AbiEii__AbiEi_1	mandatory	275	3.8e-29	99.2	0.979	0.516	75	216
Bacteria	MYA47386.1	GCA_009840635.1	Acidobacteriota	AbiEii__AbiEii	2651	defense-finder-models/DefenseFinder_1/AbiE/AbiE	UserReplicon_AbiE_1	1	1	1	2	1	AbiEii__AbiEii	mandatory	287	5.4e-34	115.6	0.962	0.753	30	245
Bacteria	MYA47391.1	GCA_009840635.1	Acidobacteriota	RM_Type_IIG__Type_IIG	2656	defense-finder-models/RM/RM/RM_Type_IIG	UserReplicon_RM_Type_IIG_3	1	1	1	1	1	RM_Type_IIG__Type_IIG	mandatory	939	6.2e-272	902	0.999	0.973	4	917
Bacteria	MYA47471.1	GCA_009840635.1	Acidobacteriota	AbiEii__AbiEi_1	2736	defense-finder-models/DefenseFinder_1/AbiE/AbiE	UserReplicon_AbiE_2	1	1	1	2	1	AbiEii__AbiEi_1	mandatory	268	6.7e-46	153.5	1	0.534	74	216
Bacteria	MYA47472.1	GCA_009840635.1	Acidobacteriota	AbiEii__AbiEii	2737	defense-finder-models/DefenseFinder_1/AbiE/AbiE	UserReplicon_AbiE_2	1	1	1	2	1	AbiEii__AbiEii	mandatory	271	5.6e-36	122.1	0.992	0.819	30	251
Bacteria	WP_211422115.1	GCF_018304765.1	Acidobacteriota	RM_Type_IV__Type_IV_REases	1040	defense-finder-models/RM/RM/RM_Type_IV	UserReplicon_RM_Type_IV_7	1	1	1	1	1	RM_Type_IV__Type_IV_REases	mandatory	302	5.6e-60	200.9	0.387	0.563	131	300
Bacteria	WP_211422260.1	GCF_018304765.1	Acidobacteriota	Cas__cas10_III_1	1181	defense-finder-models/Cas/Cas/CAS_Class1-Type-III	UserReplicon_CAS_Class1-Type-III_8	1	1	0.1	2	1	Cas__cas10_III_1	mandatory	863	2e-87	291.6	0.998	0.656	183	748
Bacteria	WP_211422261.1	GCF_018304765.1	Acidobacteriota	Cas__cmr3gr5_III-B_III-C_8	1182	defense-finder-models/Cas/Cas/CAS_Class1-Type-III	UserReplicon_CAS_Class1-Type-III_8	1	1	0.1	2	1	Cas__csm4gr5_III-A_3	mandatory	297	2.7e-69	231.7	0.751	0.966	7	293
Bacteria	WP_211422263.1	GCF_018304765.1	Acidobacteriota	Cas__csm6_III_3	1184	defense-finder-models/Cas/Cas/CAS_Class1-Type-III	UserReplicon_CAS_Class1-Type-III_8	1	1	0.1	2	1	Cas__csm6_III_2	neutral	382	2.2e-48	161.4	0.924	0.44	41	208
Bacteria	WP_211422304.1	GCF_018304765.1	Acidobacteriota	Cas__cas10_III-D_3	1224	defense-finder-models/Cas/Cas/CAS_Class1-Subtype-III-D	UserReplicon_CAS_Class1-Subtype-III-D_4	1	1	0.375	3	1	Cas__cas10_III-D_1	mandatory	489	8.5e-64	213.4	0.976	0.783	2	384
Bacteria	WP_211422307.1	GCF_018304765.1	Acidobacteriota	Cas__csm3gr7_III-D_2	1227	defense-finder-models/Cas/Cas/CAS_Class1-Subtype-III-D	UserReplicon_CAS_Class1-Subtype-III-D_4	1	1	0.375	3	1	Cas__csm3gr7_III-D_1	mandatory	768	6.6e-41	138.3	0.809	0.745	134	705
Bacteria	WP_211422308.1	GCF_018304765.1	Acidobacteriota	Cas__casR_III-D_6	1228	defense-finder-models/Cas/Cas/CAS_Class1-Subtype-III-D	UserReplicon_CAS_Class1-Subtype-III-D_4	1	1	0.375	3	1	Cas__casR_III-D_10	accessory	495	1.7e-162	539	0.972	0.98	1	485
Bacteria	WP_211422518.1	GCF_018304765.1	Acidobacteriota	RM_Type_II__Type_II_REases	1435	defense-finder-models/RM/RM/RM_Type_II	UserReplicon_RM_Type_II_1	1	1	1	2	1	RM_Type_II__Type_II_REases	mandatory	512	1.1e-10	39.8	0.435	0.301	230	383
Bacteria	WP_211422519.1	GCF_018304765.1	Acidobacteriota	RM_Type_II__Type_II_MTases	1436	defense-finder-models/RM/RM/RM_Type_II	UserReplicon_RM_Type_II_1	1	1	1	2	1	RM_Type_II__Type_II_MTases	mandatory	294	3e-27	93.2	0.642	0.772	44	270
Bacteria	WP_211423186.1	GCF_018304765.1	Acidobacteriota	SoFic__SoFic	2066	defense-finder-models/DefenseFinder_5/SoFIC/SoFic	UserReplicon_SoFic_1	1	1	1	1	1	SoFic__SoFic	mandatory	387	6.6e-119	394.7	0.983	0.941	18	381
Bacteria	WP_211423288.1	GCF_018304765.1	Acidobacteriota	RM_Type_II__Type_II_MTases	2117	defense-finder-models/RM/RM/RM_Type_II	UserReplicon_RM_Type_II_2	1	1	1	2	1	RM_Type_II__Type_II_MTases	mandatory	309	1.2e-51	173	0.73	0.887	11	284
Bacteria	WP_211423289.1	GCF_018304765.1	Acidobacteriota	RM_Type_II__Type_II_REases	2118	defense-finder-models/RM/RM/RM_Type_II	UserReplicon_RM_Type_II_2	1	1	1	2	1	RM_Type_II__Type_II_REases	mandatory	259	3.5e-60	201.8	1.191	0.992	2	258
Bacteria	WP_211423397.1	GCF_018304765.1	Acidobacteriota	Cas__cas8u1_I-G_2	2223	defense-finder-models/Cas/Cas/CAS_Class1-Subtype-I-G	UserReplicon_CAS_Class1-Subtype-I-G_2	1	1	0.429	3	1	Cas__cas8u1_I-G_1	mandatory	303	7.4e-109	361.2	0.99	0.993	3	303
Bacteria	WP_211423399.1	GCF_018304765.1	Acidobacteriota	Cas__csb2gr5_I-G_1	2224	defense-finder-models/Cas/Cas/CAS_Class1-Subtype-I-G	UserReplicon_CAS_Class1-Subtype-I-G_2	1	1	0.429	3	1	Cas__cas5u_I-G_1	mandatory	516	3.8e-74	247.9	0.982	0.986	1	509
Bacteria	WP_211423400.1	GCF_018304765.1	Acidobacteriota	Cas__csb1gr7_I-G_1	2225	defense-finder-models/Cas/Cas/CAS_Class1-Subtype-I-G	UserReplicon_CAS_Class1-Subtype-I-G_2	1	1	0.429	3	1	Cas__cas7_I-G_4	mandatory	439	1.2e-57	191.8	0.988	0.437	18	209
Bacteria	WP_211423402.1	GCF_018304765.1	Acidobacteriota	Cas__WYL_I_II_III_IV_V_VI_4	2227	defense-finder-models/Cas/Cas/CAS_Class1-Subtype-I-G	UserReplicon_CAS_Class1-Subtype-I-G_2	1	1	0.429	3	1	Cas__WYL_I_II_III_IV_V_VI_1	neutral	359	6.4e-28	95.4	0.959	0.496	155	332
Bacteria	WP_211423474.1	GCF_018304765.1	Acidobacteriota	RM_Type_III__Type_III_REases	2299	defense-finder-models/RM/RM/RM_Type_III	UserReplicon_RM_Type_III_5	1	1	1	2	1	RM_Type_III__Type_III_REases	mandatory	753	4.3e-09	32.5	0.373	0.586	121	561
Bacteria	WP_211423476.1	GCF_018304765.1	Acidobacteriota	RM_Type_III__Type_III_MTases	2301	defense-finder-models/RM/RM/RM_Type_III	UserReplicon_RM_Type_III_5	1	1	1	2	1	RM_Type_III__Type_III_MTases	mandatory	912	2.2e-76	255.6	0.641	0.452	390	801
Bacteria	WP_211423537.1	GCF_018304765.1	Acidobacteriota	RM_Type_II__Type_II_MTases	2358	defense-finder-models/RM/RM/RM_Type_II	UserReplicon_RM_Type_II_3	1	1	1	2	2	RM_Type_II__Type_II_MTases	mandatory	329	5.7e-77	256.3	0.675	0.812	21	287
Bacteria	WP_211423539.1	GCF_018304765.1	Acidobacteriota	RM_Type_II__Type_II_MTases	2360	defense-finder-models/RM/RM/RM_Type_II	UserReplicon_RM_Type_II_3	1	1	1	2	2	RM_Type_II__Type_II_MTases	mandatory	314	1.2e-36	124	0.656	0.882	20	296
Bacteria	WP_211423540.1	GCF_018304765.1	Acidobacteriota	RM_Type_II__Type_II_REases	2361	defense-finder-models/RM/RM/RM_Type_II	UserReplicon_RM_Type_II_3	1	1	1	2	2	RM_Type_II__Type_II_REases	mandatory	203	1.1e-07	30	0.626	0.892	21	201
Bacteria	WP_211423603.1	GCF_018304765.1	Acidobacteriota	Cas__cas3HD_I_1	2421	defense-finder-models/Cas/Cas/CAS_Class1-Subtype-I-G	UserReplicon_CAS_Class1-Subtype-I-G_3	1	1	0.429	3	1	Cas__cas3_I_2	accessory	917	2.7e-11	41.1	0.951	0.227	710	917
Bacteria	WP_211423605.1	GCF_018304765.1	Acidobacteriota	Cas__csb1gr7_I-G_1	2423	defense-finder-models/Cas/Cas/CAS_Class1-Subtype-I-G	UserReplicon_CAS_Class1-Subtype-I-G_3	1	1	0.429	3	1	Cas__cas7_I-G_4	mandatory	436	4.4e-28	95.6	0.971	0.417	13	194
Bacteria	WP_211423606.1	GCF_018304765.1	Acidobacteriota	Cas__csb2gr5_I-G_1	2424	defense-finder-models/Cas/Cas/CAS_Class1-Subtype-I-G	UserReplicon_CAS_Class1-Subtype-I-G_3	1	1	0.429	3	1	Cas__cas5u_I-G_1	mandatory	505	7.4e-32	108.3	0.99	0.992	4	504
Bacteria	WP_211423650.1	GCF_018304765.1	Acidobacteriota	Gao_RL__RL_A	2465	defense-finder-models/DefenseFinder_2/Gao_RL/Gao_RL	UserReplicon_Gao_RL_1	1	1	1	4	1	Gao_RL__RL_A	mandatory	1041	3.4e-250	830.3	0.998	0.994	3	1037
Bacteria	WP_211423651.1	GCF_018304765.1	Acidobacteriota	Gao_RL__RL_B	2466	defense-finder-models/DefenseFinder_2/Gao_RL/Gao_RL	UserReplicon_Gao_RL_1	1	1	1	4	1	Gao_RL__RL_B	mandatory	210	2.4e-54	181.1	0.943	0.881	21	205
Bacteria	WP_211423655.1	GCF_018304765.1	Acidobacteriota	Gao_RL__RL_C	2470	defense-finder-models/DefenseFinder_2/Gao_RL/Gao_RL	UserReplicon_Gao_RL_1	1	1	1	4	1	Gao_RL__RL_C	mandatory	984	0	1156.6	0.969	0.976	4	963
Bacteria	WP_211423659.1	GCF_018304765.1	Acidobacteriota	Gao_RL__RL_D	2474	defense-finder-models/DefenseFinder_2/Gao_RL/Gao_RL	UserReplicon_Gao_RL_1	1	1	1	4	1	Gao_RL__RL_D	mandatory	911	0	1063	1	0.999	1	910
Bacteria	WP_211423808.1	GCF_018304765.1	Acidobacteriota	Cas__WYL_I_II_III_IV_V_VI_4	2620	defense-finder-models/Cas/Cas/CAS_Class1-Subtype-I-B	UserReplicon_CAS_Class1-Subtype-I-B_1	1	1	0.75	6	1	Cas__WYL_I_II_III_IV_V_VI_1	neutral	328	3.6e-43	145.1	0.988	0.537	149	324
Bacteria	WP_211423809.1	GCF_018304765.1	Acidobacteriota	Cas__cas6_I_II_III_IV_V_VI_21	2621	defense-finder-models/Cas/Cas/CAS_Class1-Subtype-I-B	UserReplicon_CAS_Class1-Subtype-I-B_1	1	1	0.75	6	1	Cas__cas6_I-B_III_1	accessory	199	3.4e-63	210.5	1	0.95	8	196
Bacteria	WP_211423810.1	GCF_018304765.1	Acidobacteriota	Cas__cas3_I_2	2622	defense-finder-models/Cas/Cas/CAS_Class1-Subtype-I-B	UserReplicon_CAS_Class1-Subtype-I-B_1	1	1	0.75	6	1	Cas__cas3_I_5	accessory	822	2.8e-50	168.8	0.901	0.405	320	652
Bacteria	WP_211423811.1	GCF_018304765.1	Acidobacteriota	Cas__cas8b3_I-B_1	2623	defense-finder-models/Cas/Cas/CAS_Class1-Subtype-I-B	UserReplicon_CAS_Class1-Subtype-I-B_1	1	1	0.75	6	1	Cas__cas8b2_I-B_2	mandatory	523	1e-35	120.3	0.924	0.581	16	319
Bacteria	WP_211423812.1	GCF_018304765.1	Acidobacteriota	Cas__cas7_I-B_6	2624	defense-finder-models/Cas/Cas/CAS_Class1-Subtype-I-B	UserReplicon_CAS_Class1-Subtype-I-B_1	1	1	0.75	6	1	Cas__cas7_I-B_6	mandatory	317	1.3e-28	97.5	0.613	0.577	11	193
Bacteria	WP_211423813.1	GCF_018304765.1	Acidobacteriota	Cas__cas5_I-B_7	2625	defense-finder-models/Cas/Cas/CAS_Class1-Subtype-I-B	UserReplicon_CAS_Class1-Subtype-I-B_1	1	1	0.75	6	1	Cas__cas5_I-B_6	mandatory	224	2e-45	152.3	0.994	0.826	3	187
Bacteria	WP_211423814.1	GCF_018304765.1	Acidobacteriota	Cas__cas1_I_II_III_IV_V_VI_1	2626	defense-finder-models/Cas/Cas/CAS_Class1-Subtype-I-B	UserReplicon_CAS_Class1-Subtype-I-B_1	1	1	0.75	6	1	Cas__cas1_I_II_III_IV_V_VI_7	accessory	563	3.7e-90	299.6	1	0.591	220	552
Bacteria	WP_211423935.1	GCF_018304765.1	Acidobacteriota	Cas__cas12f2_V-F_1	2746	defense-finder-models/Cas/Cas/CAS_Class2-Subtype-V-F	UserReplicon_CAS_Class2-Subtype-V-F_11	1	1	0.5	2	1	Cas__cas12f1_V-F_3	mandatory	420	6.4e-88	293	0.704	0.85	12	368
Bacteria	WP_211423937.1	GCF_018304765.1	Acidobacteriota	RM_Type_III__Type_III_REases	2747	defense-finder-models/RM/RM/RM_Type_III	UserReplicon_RM_Type_III_6	1	1	1	2	1	RM_Type_III__Type_III_REases	mandatory	934	1.5e-29	100.2	0.428	0.479	123	569
Bacteria	WP_211423938.1	GCF_018304765.1	Acidobacteriota	RM_Type_III__Type_III_MTases	2748	defense-finder-models/RM/RM/RM_Type_III	UserReplicon_RM_Type_III_6	1	1	1	2	1	RM_Type_III__Type_III_MTases	mandatory	644	2e-48	163.2	0.362	0.401	7	264
Bacteria	WP_211423940.1	GCF_018304765.1	Acidobacteriota	Cas__cas4_I_II_III_IV_V_VI_1	2750	defense-finder-models/Cas/Cas/CAS_Class2-Subtype-V-F	UserReplicon_CAS_Class2-Subtype-V-F_11	1	1	0.5	2	1	Cas__cas4_I_II_III_IV_V_VI_1	accessory	972	2.6e-14	51.2	0.732	0.144	802	941
Bacteria	WP_211423946.1	GCF_018304765.1	Acidobacteriota	RM_Type_IIG__Type_IIG	2755	defense-finder-models/RM/RM/RM_Type_IIG	UserReplicon_RM_Type_IIG_4	1	1	1	1	1	RM_Type_IIG__Type_IIG	mandatory	1125	7.5e-113	376.2	0.857	0.935	51	1102
Bacteria	WP_015760673.1	GCF_000024265.1	Actinobacteriota	Eleos__LeoB	2043	defense-finder-models/DefenseFinder_5/Eleos/Eleos	UserReplicon_Eleos_1	1	1	0.5	2	1	Eleos__LeoB	mandatory	510	0.00039	16.7	0.185	0.21	7	113
Bacteria	CAM61182.1	GCA_000069185.1	Actinobacteriota	Dnd__DndA	1100	defense-finder-models/DefenseFinder_4/Dnd/Dnd_ABCDE	UserReplicon_Dnd_ABCDE_1	1	1	1	4.5	1	Dnd__DndA	accessory	399	1.7e-185	614.5	0.992	0.937	24	397
Bacteria	CAM61183.1	GCA_000069185.1	Actinobacteriota	Dnd__DndB	1101	defense-finder-models/DefenseFinder_4/Dnd/Dnd_ABCDE	UserReplicon_Dnd_ABCDE_1	1	1	1	4.5	1	Dnd__DndB	mandatory	380	5.2e-174	577.1	0.808	0.942	19	376
Bacteria	CAM61184.1	GCA_000069185.1	Actinobacteriota	Dnd__DndC	1102	defense-finder-models/DefenseFinder_4/Dnd/Dnd_ABCDE	UserReplicon_Dnd_ABCDE_1	1	1	1	4.5	1	Dnd__DndC	mandatory	512	4.8e-213	707.5	0.742	0.914	13	480
Bacteria	CAM61185.1	GCA_000069185.1	Actinobacteriota	Dnd__DndD	1103	defense-finder-models/DefenseFinder_4/Dnd/Dnd_ABCDE	UserReplicon_Dnd_ABCDE_1	1	1	1	4.5	1	Dnd__DndD	mandatory	658	2.4e-201	669.1	0.875	1	1	658
Bacteria	CAM61186.1	GCA_000069185.1	Actinobacteriota	Dnd__DndE	1104	defense-finder-models/DefenseFinder_4/Dnd/Dnd_ABCDE	UserReplicon_Dnd_ABCDE_1	1	1	1	4.5	1	Dnd__DndE	mandatory	130	3e-57	191.7	0.649	0.969	1	126
Bacteria	CAM61576.1	GCA_000069185.1	Actinobacteriota	Wadjet__JetA_I	1494	defense-finder-models/DefenseFinder_2/Wadjet/Wadjet_I	UserReplicon_Wadjet_I_2	1	1	0.75	3	1	Wadjet__JetA_I	mandatory	486	9.3e-92	306.6	0.97	0.961	10	476
Bacteria	CAM61577.1	GCA_000069185.1	Actinobacteriota	Wadjet__JetB_I	1495	defense-finder-models/DefenseFinder_2/Wadjet/Wadjet_I	UserReplicon_Wadjet_I_2	1	1	0.75	3	1	Wadjet__JetB_I	mandatory	249	4.2e-60	201.2	0.901	0.896	25	247
Bacteria	CAM61578.1	GCA_000069185.1	Actinobacteriota	Wadjet__JetC_I	1496	defense-finder-models/DefenseFinder_2/Wadjet/Wadjet_I	UserReplicon_Wadjet_I_2	1	1	0.75	3	1	Wadjet__JetC_I	mandatory	1115	5.5e-270	896.9	0.974	0.974	3	1088
Bacteria	CAM62172.1	GCA_000069185.1	Actinobacteriota	CBASS__Phospholipase	2090	defense-finder-models/DefenseFinder_5/CBASS/CBASS_II	UserReplicon_CBASS_II_3	1	1	1	3	1	CBASS__Effector_2TM_S_2TMBeta	mandatory	371	7.6e-103	342.3	0.973	0.844	41	353
Bacteria	CAM62173.1	GCA_000069185.1	Actinobacteriota	CBASS__Cyclase_II	2091	defense-finder-models/DefenseFinder_5/CBASS/CBASS_II	UserReplicon_CBASS_II_3	1	1	1	3	1	CBASS__Cyclase_SMODS	mandatory	337	4.1e-42	142.6	0.959	0.955	6	327
Bacteria	CAM62174.1	GCA_000069185.1	Actinobacteriota	CBASS__AG_E1_ThiF	2092	defense-finder-models/DefenseFinder_5/CBASS/CBASS_II	UserReplicon_CBASS_II_3	1	1	1	3	1	CBASS__E2	mandatory	591	5.2e-17	60.2	0.504	0.203	341	460
Bacteria	CAM64795.1	GCA_000069185.1	Actinobacteriota	RM_Type_IV__Type_IV_REases	4713	defense-finder-models/RM/RM/RM_Type_IV	UserReplicon_RM_Type_IV_1	1	1	1	1	1	RM_Type_IV__Type_IV_REases	mandatory	231	1.2e-17	63	0.242	0.485	100	211
Bacteria	NP_214573.1	GCF_000195955.2	Actinobacteriota	DarTG__DarT	54	defense-finder-models/DefenseFinder_2/DarTG/DarTG	UserReplicon_DarTG_1	1	1	1	2	1	DarTG__DarT	mandatory	230	3e-57	191.5	1	0.878	29	230
Bacteria	NP_214574.1	GCF_000195955.2	Actinobacteriota	DarTG__DarG	55	defense-finder-models/DefenseFinder_2/DarTG/DarTG	UserReplicon_DarTG_1	1	1	1	2	1	DarTG__DarG	mandatory	352	5.3e-58	194.4	0.962	0.997	1	351
Bacteria	NP_215560.1	GCF_000195955.2	Actinobacteriota	AbiEii__AbiEi_4	928	defense-finder-models/DefenseFinder_1/AbiE/AbiE	UserReplicon_AbiE_1	1	1	1	2	1	AbiEii__AbiEi_1	mandatory	207	4.4e-14	50.2	1	0.237	18	66
Bacteria	NP_215561.1	GCF_000195955.2	Actinobacteriota	AbiEii__AbiEii	929	defense-finder-models/DefenseFinder_1/AbiE/AbiE	UserReplicon_AbiE_1	1	1	1	2	1	AbiEii__AbiEii	mandatory	293	6.9e-17	60	0.883	0.788	49	279
Bacteria	NP_217044.1	GCF_000195955.2	Actinobacteriota	RM_Type_IV__Type_IV_REases	2246	defense-finder-models/RM/RM/RM_Type_IV	UserReplicon_RM_Type_IV_1	1	1	1	1	1	RM_Type_IV__Type_IV_REases	mandatory	306	1.8e-50	169.9	0.39	0.559	133	303
Bacteria	NP_217332.1	GCF_000195955.2	Actinobacteriota	Cas__cas2_I_II_III_IV_V_VI_5	2504	defense-finder-models/Cas/Cas/CAS_Class1-Subtype-III-A	UserReplicon_CAS_Class1-Subtype-III-A_1	1	1	1	9	1	Cas__cas2_I_II_III_IV_V_VI_5	accessory	113	7.8e-25	84.9	0.989	0.761	26	111
Bacteria	NP_217333.1	GCF_000195955.2	Actinobacteriota	Cas__cas1_I_II_III_IV_V_VI_8	2505	defense-finder-models/Cas/Cas/CAS_Class1-Subtype-III-A	UserReplicon_CAS_Class1-Subtype-III-A_1	1	1	1	9	1	Cas__cas1_I_II_III_IV_V_VI_10	accessory	338	1.5e-107	357.3	0.988	0.997	1	337
Bacteria	NP_217334.1	GCF_000195955.2	Actinobacteriota	Cas__csm6_III_2	2506	defense-finder-models/Cas/Cas/CAS_Class1-Subtype-III-A	UserReplicon_CAS_Class1-Subtype-III-A_1	1	1	1	9	1	Cas__csm6_III_2	accessory	382	2.6e-160	531	1	0.935	22	378
Bacteria	NP_217335.1	GCF_000195955.2	Actinobacteriota	Cas__csm5gr7_III-A_3	2507	defense-finder-models/Cas/Cas/CAS_Class1-Subtype-III-A	UserReplicon_CAS_Class1-Subtype-III-A_1	1	1	1	9	1	Cas__csm5gr7_III-A_2	mandatory	375	8.5e-128	424.9	1	0.976	8	373
Bacteria	NP_217336.1	GCF_000195955.2	Actinobacteriota	Cas__csm4gr5_III-A_3	2508	defense-finder-models/Cas/Cas/CAS_Class1-Subtype-III-A	UserReplicon_CAS_Class1-Subtype-III-A_1	1	1	1	9	1	Cas__csm4gr5_III-A_3	mandatory	302	2.8e-97	323.5	0.994	0.993	1	300
Bacteria	NP_217337.1	GCF_000195955.2	Actinobacteriota	Cas__csm3gr7_III-A_1	2509	defense-finder-models/Cas/Cas/CAS_Class1-Subtype-III-A	UserReplicon_CAS_Class1-Subtype-III-A_1	1	1	1	9	1	Cas__csm3gr7_III-A_1	mandatory	236	6.6e-80	265.7	0.972	0.903	7	219
Bacteria	NP_217338.1	GCF_000195955.2	Actinobacteriota	Cas__csm2gr11_III-A_1	2510	defense-finder-models/Cas/Cas/CAS_Class1-Subtype-III-A	UserReplicon_CAS_Class1-Subtype-III-A_1	1	1	1	9	1	Cas__csm2gr11_III-A_15	mandatory	124	7.8e-23	79	0.99	0.75	27	119
Bacteria	NP_217339.1	GCF_000195955.2	Actinobacteriota	Cas__cas10_III_7	2511	defense-finder-models/Cas/Cas/CAS_Class1-Subtype-III-A	UserReplicon_CAS_Class1-Subtype-III-A_1	1	1	1	9	1	Cas__cas10_III_7	accessory	809	1.1e-236	785.9	0.999	0.999	1	808
Bacteria	NP_217340.1	GCF_000195955.2	Actinobacteriota	Cas__cas6_I_II_III_IV_V_VI_15	2512	defense-finder-models/Cas/Cas/CAS_Class1-Subtype-III-A	UserReplicon_CAS_Class1-Subtype-III-A_1	1	1	1	9	1	Cas__cas6_I_II_III_IV_V_VI_15	accessory	314	1.9e-101	336.9	0.993	0.889	27	305
Bacteria	NP_217342.1	GCF_000195955.2	Actinobacteriota	AbiEii__AbiEii	2514	defense-finder-models/DefenseFinder_1/AbiE/AbiE	UserReplicon_AbiE_2	1	1	1	2	1	AbiEii__AbiEii	mandatory	294	1.8e-24	84.9	0.958	0.806	36	272
Bacteria	NP_217343.1	GCF_000195955.2	Actinobacteriota	AbiEii__AbiEi_1	2515	defense-finder-models/DefenseFinder_1/AbiE/AbiE	UserReplicon_AbiE_2	1	1	1	2	1	AbiEii__AbiEi_1	mandatory	295	1.6e-50	168.9	0.958	0.522	84	237
Bacteria	WP_002525369.1	GCF_003030305.1	Actinobacteriota	RM_Type_IIG__Type_IIG	2136	defense-finder-models/RM/RM/RM_Type_IIG	UserReplicon_RM_Type_IIG_1	1	1	1	1	1	RM_Type_IIG__Type_IIG	mandatory	1541	1.1e-185	617.4	1.136	0.966	47	1534
Bacteria	WP_003811029.1	GCF_000010425.1	Actinobacteriota	Cas__cas1_I_II_III_IV_V_VI_6	285	defense-finder-models/Cas/Cas/CAS_Class1-Subtype-I-C	UserReplicon_CAS_Class1-Subtype-I-C_1	1	1	0.286	2	1	Cas__cas1_I_II_III_IV_V_VI_6	accessory	343	1.7e-138	457.9	1	0.985	4	341
Bacteria	WP_003811034.1	GCF_000010425.1	Actinobacteriota	Cas__cas7_I-C_7	286	defense-finder-models/Cas/Cas/CAS_Class1-Subtype-I-C	UserReplicon_CAS_Class1-Subtype-I-C_1	1	1	0.286	2	1	Cas__cas7_I-C_13	mandatory	281	7.4e-96	317.2	0.892	0.904	7	260
Bacteria	WP_003828966.1	GCF_001025175.1	Actinobacteriota	RM_Type_IIG__Type_IIG	534	defense-finder-models/RM/RM/RM_Type_IIG	UserReplicon_RM_Type_IIG_1	1	1	1	1	1	RM_Type_IIG__Type_IIG	mandatory	910	8.2e-194	643.2	0.66	0.902	7	827
Bacteria	WP_004220804.1	GCF_001025215.1	Actinobacteriota	Cas__cas2_I_II_III_IV_V_VI_5	531	defense-finder-models/Cas/Cas/CAS_Class1-Subtype-I-C	UserReplicon_CAS_Class1-Subtype-I-C_1	1	1	1	7	1	Cas__cas2_I_II_III_IV_V_VI_3	accessory	96	2.2e-27	91.9	0.933	0.906	1	87
Bacteria	WP_004220806.1	GCF_001025215.1	Actinobacteriota	Cas__cas1_I_II_III_IV_V_VI_6	532	defense-finder-models/Cas/Cas/CAS_Class1-Subtype-I-C	UserReplicon_CAS_Class1-Subtype-I-C_1	1	1	1	7	1	Cas__cas1_I_II_III_IV_V_VI_6	accessory	343	1.1e-138	458.7	1	0.985	4	341
Bacteria	WP_004220809.1	GCF_001025215.1	Actinobacteriota	Cas__cas4_I_II_III_IV_V_VI_6	533	defense-finder-models/Cas/Cas/CAS_Class1-Subtype-I-C	UserReplicon_CAS_Class1-Subtype-I-C_1	1	1	1	7	1	Cas__cas4_I_II_III_IV_V_VI_1	accessory	225	7.9e-35	117.1	0.994	0.844	15	204
Bacteria	WP_004220812.1	GCF_001025215.1	Actinobacteriota	Cas__cas7_I-C_7	534	defense-finder-models/Cas/Cas/CAS_Class1-Subtype-I-C	UserReplicon_CAS_Class1-Subtype-I-C_1	1	1	1	7	1	Cas__cas7_I-C_13	mandatory	281	1.3e-96	319.8	0.888	0.9	7	259
Bacteria	WP_004220815.1	GCF_001025215.1	Actinobacteriota	Cas__cas8c_I-C_4	535	defense-finder-models/Cas/Cas/CAS_Class1-Subtype-I-C	UserReplicon_CAS_Class1-Subtype-I-C_1	1	1	1	7	1	Cas__cas8c_I-C_4	mandatory	625	3.9e-103	342.5	0.975	0.923	34	610
Bacteria	WP_004220816.1	GCF_001025215.1	Actinobacteriota	Cas__cas5_I-C_11	536	defense-finder-models/Cas/Cas/CAS_Class1-Subtype-I-C	UserReplicon_CAS_Class1-Subtype-I-C_1	1	1	1	7	1	Cas__cas5_I-C_11	mandatory	235	5e-63	209.3	0.995	0.826	8	201
Bacteria	WP_004220823.1	GCF_001025215.1	Actinobacteriota	Cas__cas3_I_5	537	defense-finder-models/Cas/Cas/CAS_Class1-Subtype-I-C	UserReplicon_CAS_Class1-Subtype-I-C_1	1	1	1	7	1	Cas__cas3_I_5	accessory	580	2.8e-58	194.5	0.516	0.679	24	417
Bacteria	WP_004221095.1	GCF_001025215.1	Actinobacteriota	AbiD__AbiD	611	defense-finder-models/DefenseFinder_1/AbiD/AbiD	UserReplicon_AbiD_1	1	1	1	1	1	AbiD__AbiD	mandatory	245	5.7e-43	144.2	0.724	0.976	1	239
Bacteria	WP_004221169.1	GCF_001025215.1	Actinobacteriota	Thoeris_II__ThsA_new_petit	628	defense-finder-models/DefenseFinder_3/Thoeris/Thoeris_II	UserReplicon_Thoeris_II_1	1	1	1	2	1	Thoeris_II__ThsA_new_petit	mandatory	286	9.1e-16	55	0.779	0.703	81	281
Bacteria	WP_004221174.1	GCF_001025215.1	Actinobacteriota	Thoeris__ThsB_Global	629	defense-finder-models/DefenseFinder_3/Thoeris/Thoeris_II	UserReplicon_Thoeris_II_1	1	1	1	2	1	Thoeris__ThsB_Global	mandatory	188	1.4e-10	38	0.57	0.665	30	154
Bacteria	WP_004221180.1	GCF_001025215.1	Actinobacteriota	AbiH__AbiH	632	defense-finder-models/DefenseFinder_1/AbiH/AbiH	UserReplicon_AbiH_3	1	1	1	1	1	AbiH__AbiH	mandatory	483	2.5e-18	63.7	0.954	0.663	94	413
Bacteria	WP_004221473.1	GCF_001025215.1	Actinobacteriota	RM__Type_I_MTases	704	defense-finder-models/RM/RM/RM_Type_I	UserReplicon_RM_Type_I_1	1	1	0.667	2	1	RM__Type_I_MTases	mandatory	853	3.3e-162	537.6	0.984	0.977	2	834
Bacteria	WP_004221475.1	GCF_001025215.1	Actinobacteriota	RM__Type_I_REases	705	defense-finder-models/RM/RM/RM_Type_I	UserReplicon_RM_Type_I_1	1	1	0.667	2	1	RM__Type_I_REases	mandatory	1061	1.1e-147	490.7	0.76	0.778	1	825
Bacteria	WP_009305541.1	GCF_000024265.1	Actinobacteriota	AbiEii__AbiEi_4	436	defense-finder-models/DefenseFinder_1/AbiE/AbiE	UserReplicon_AbiE_2	1	1	1	2	1	AbiEii__AbiEi_1	mandatory	208	5.3e-13	46.4	0.918	0.212	10	53
Bacteria	WP_009305542.1	GCF_000024265.1	Actinobacteriota	AbiEii__AbiEii	437	defense-finder-models/DefenseFinder_1/AbiE/AbiE	UserReplicon_AbiE_2	1	1	1	2	1	AbiEii__AbiEii	mandatory	319	3.1e-21	73.9	0.929	0.671	36	249
Bacteria	WP_009979742.1	GCF_009741445.1	Actinobacteriota	AbiEii__AbiEi_4	3183	defense-finder-models/DefenseFinder_1/AbiE/AbiE	UserReplicon_AbiE_1	1	1	1	2	1	AbiEii__AbiEi_1	mandatory	198	1.6e-07	29.4	0.98	0.242	10	57
Bacteria	WP_009979743.1	GCF_009741445.1	Actinobacteriota	AbiEii__AbiEii	3184	defense-finder-models/DefenseFinder_1/AbiE/AbiE	UserReplicon_AbiE_1	1	1	1	2	1	AbiEii__AbiEii	mandatory	288	1.4e-30	105.1	0.937	0.795	40	268
Bacteria	WP_010079826.1	GCF_000023205.1	Actinobacteriota	Wadjet__JetD_I	1075	defense-finder-models/DefenseFinder_2/Wadjet/Wadjet_I	UserReplicon_Wadjet_I_2	1	1	1	4	1	Wadjet__JetD_I	mandatory	426	5.3e-94	312.6	0.964	0.946	1	403
Bacteria	WP_010079827.1	GCF_000023205.1	Actinobacteriota	Wadjet__JetC_I	1076	defense-finder-models/DefenseFinder_2/Wadjet/Wadjet_I	UserReplicon_Wadjet_I_2	1	1	1	4	1	Wadjet__JetC_I	mandatory	1118	5.7e-287	951.9	0.983	0.974	28	1116
Bacteria	WP_010079828.1	GCF_000023205.1	Actinobacteriota	Wadjet__JetB_I	1077	defense-finder-models/DefenseFinder_2/Wadjet/Wadjet_I	UserReplicon_Wadjet_I_2	1	1	1	4	1	Wadjet__JetB_I	mandatory	226	4.4e-51	170.5	0.851	0.925	16	224
Bacteria	WP_010079829.1	GCF_000023205.1	Actinobacteriota	Wadjet__JetA_I	1078	defense-finder-models/DefenseFinder_2/Wadjet/Wadjet_I	UserReplicon_Wadjet_I_2	1	1	1	4	1	Wadjet__JetA_I	mandatory	487	5.9e-123	408.4	0.984	0.992	1	483
Bacteria	WP_010935621.1	GCF_001457455.1	Actinobacteriota	AbiD__AbiD	514	defense-finder-models/DefenseFinder_1/AbiD/AbiD	UserReplicon_AbiD_1	1	1	1	1	1	AbiD__AbiD	mandatory	328	6.8e-80	265.8	0.92	0.912	26	324
Bacteria	WP_011013859.1	GCF_000011325.1	Actinobacteriota	RM_Type_IIG__Type_IIG	1147	defense-finder-models/RM/RM/RM_Type_IIG	UserReplicon_RM_Type_IIG_1	1	1	1	1	1	RM_Type_IIG__Type_IIG	mandatory	1532	2.8e-185	615.8	0.991	0.941	8	1448
Bacteria	WP_011014322.1	GCF_000011325.1	Actinobacteriota	Uzume__UzuA	1520	defense-finder-models/DefenseFinder_5/Uzume/Uzume	UserReplicon_Uzume_1	1	1	1	1	1	Uzume__UzuA	mandatory	270	7.4e-84	278.8	1	1	1	270
Bacteria	WP_011015393.1	GCF_000011325.1	Actinobacteriota	Wadjet__JetD_I	2333	defense-finder-models/DefenseFinder_2/Wadjet/Wadjet_I	UserReplicon_Wadjet_I_2	1	1	1	4	1	Wadjet__JetD_I	mandatory	368	4.8e-79	263.7	0.954	0.978	7	366
Bacteria	WP_011015394.1	GCF_000011325.1	Actinobacteriota	Wadjet__JetC_I	2334	defense-finder-models/DefenseFinder_2/Wadjet/Wadjet_I	UserReplicon_Wadjet_I_2	1	1	1	4	1	Wadjet__JetC_I	mandatory	1111	8.2e-285	945.2	0.974	0.982	3	1093
Bacteria	WP_011015395.1	GCF_000011325.1	Actinobacteriota	Wadjet__JetB_I	2335	defense-finder-models/DefenseFinder_2/Wadjet/Wadjet_I	UserReplicon_Wadjet_I_2	1	1	1	4	1	Wadjet__JetB_I	mandatory	212	3.6e-53	177.8	0.831	0.972	6	211
Bacteria	WP_011015396.1	GCF_000011325.1	Actinobacteriota	Wadjet__JetA_I	2336	defense-finder-models/DefenseFinder_2/Wadjet/Wadjet_I	UserReplicon_Wadjet_I_2	1	1	1	4	1	Wadjet__JetA_I	mandatory	495	2.8e-117	390.1	0.98	0.962	6	481
Bacteria	WP_011015608.1	GCF_000011325.1	Actinobacteriota	RM_Type_IIG__Type_IIG	2495	defense-finder-models/RM/RM/RM_Type_IIG	UserReplicon_RM_Type_IIG_2	1	1	1	1	1	RM_Type_IIG__Type_IIG	mandatory	1643	2.9e-299	993.5	1.239	0.999	3	1643
Bacteria	WP_011743506.1	GCF_000010425.1	Actinobacteriota	Cas__cas2_I_II_III_IV_V_VI_5	873	defense-finder-models/Cas/Cas/CAS_Class1-Subtype-I-C	UserReplicon_CAS_Class1-Subtype-I-C_2	1	1	0.714	5	1	Cas__cas2_I_II_III_IV_V_VI_3	accessory	96	4.5e-27	90.8	0.933	0.906	1	87
Bacteria	WP_011743507.1	GCF_000010425.1	Actinobacteriota	Cas__cas4_I_II_III_IV_V_VI_6	874	defense-finder-models/Cas/Cas/CAS_Class1-Subtype-I-C	UserReplicon_CAS_Class1-Subtype-I-C_2	1	1	0.714	5	1	Cas__cas4_I_II_III_IV_V_VI_1	accessory	225	7.4e-35	117.1	0.994	0.844	15	204
Bacteria	WP_011743508.1	GCF_000010425.1	Actinobacteriota	Cas__cas8c_I-C_4	875	defense-finder-models/Cas/Cas/CAS_Class1-Subtype-I-C	UserReplicon_CAS_Class1-Subtype-I-C_2	1	1	0.714	5	1	Cas__cas8c_I-C_4	mandatory	288	2.2e-62	207.9	0.44	0.944	1	272
Bacteria	WP_011743509.1	GCF_000010425.1	Actinobacteriota	Cas__cas8c_I-C_4	876	defense-finder-models/Cas/Cas/CAS_Class1-Subtype-I-C	UserReplicon_CAS_Class1-Subtype-I-C_2	1	1	0.714	5	1	Cas__cas8c_I-C_4	mandatory	343	2.3e-41	138.5	0.513	0.86	33	327
Bacteria	WP_011743510.1	GCF_000010425.1	Actinobacteriota	Cas__cas5_I-C_11	877	defense-finder-models/Cas/Cas/CAS_Class1-Subtype-I-C	UserReplicon_CAS_Class1-Subtype-I-C_2	1	1	0.714	5	1	Cas__cas5_I-C_11	mandatory	240	5.5e-67	222.1	0.995	0.829	8	206
Bacteria	WP_011743511.1	GCF_000010425.1	Actinobacteriota	Cas__cas3_I_5	878	defense-finder-models/Cas/Cas/CAS_Class1-Subtype-I-C	UserReplicon_CAS_Class1-Subtype-I-C_2	1	1	0.714	5	1	Cas__cas3_I_5	accessory	805	9.8e-54	179.4	0.456	0.434	254	602
Bacteria	WP_011743550.1	GCF_000010425.1	Actinobacteriota	RM_Type_II__Type_II_REases	902	defense-finder-models/RM/RM/RM_Type_II	UserReplicon_RM_Type_II_1	1	1	1	2	2	RM_Type_II__Type_II_REases	mandatory	256	4.1e-68	226.8	0.973	0.992	1	254
Bacteria	WP_011743551.1	GCF_000010425.1	Actinobacteriota	RM_Type_II__Type_II_REases	903	defense-finder-models/RM/RM/RM_Type_II	UserReplicon_RM_Type_II_1	1	1	1	2	2	RM_Type_II__Type_II_REases	mandatory	643	3.6e-93	310	1.969	0.807	123	641
Bacteria	WP_011743554.1	GCF_000010425.1	Actinobacteriota	RM_Type_II__Type_II_REases	905	defense-finder-models/RM/RM/RM_Type_II	UserReplicon_RM_Type_II_1	1	1	1	2	2	RM_Type_II__Type_II_REases	mandatory	486	1.6e-47	159.3	1.656	0.829	4	406
Bacteria	WP_011743555.1	GCF_000010425.1	Actinobacteriota	RM_Type_II__Type_II_MTases	906	defense-finder-models/RM/RM/RM_Type_II	UserReplicon_RM_Type_II_1	1	1	1	2	2	RM_Type_II__Type_II_MTases	mandatory	424	1.1e-190	630.5	1.09	0.983	1	417
Bacteria	WP_011743602.1	GCF_000010425.1	Actinobacteriota	RM_Type_II__Type_II_REases	923	defense-finder-models/RM/RM/RM_Type_II	UserReplicon_RM_Type_II_2	1	1	1	2	2	RM_Type_II__Type_II_REases	mandatory	167	5.6e-18	61.8	0.515	0.856	1	143
Bacteria	WP_011743603.1	GCF_000010425.1	Actinobacteriota	RM_Type_II__Type_II_REases	924	defense-finder-models/RM/RM/RM_Type_II	UserReplicon_RM_Type_II_2	1	1	1	2	2	RM_Type_II__Type_II_REases	mandatory	472	1.9e-22	76.9	1.393	0.82	43	429
Bacteria	WP_011743604.1	GCF_000010425.1	Actinobacteriota	RM_Type_II__Type_II_REases	925	defense-finder-models/RM/RM/RM_Type_II	UserReplicon_RM_Type_II_2	1	1	1	2	2	RM_Type_II__Type_II_REases	mandatory	300	9.4e-27	91.3	0.966	0.93	15	293
Bacteria	WP_011743605.1	GCF_000010425.1	Actinobacteriota	RM_Type_II__Type_II_MTases	926	defense-finder-models/RM/RM/RM_Type_II	UserReplicon_RM_Type_II_2	1	1	1	2	2	RM_Type_II__Type_II_MTases	mandatory	383	1e-128	425.7	0.852	0.809	71	380
Bacteria	WP_011743666.1	GCF_000010425.1	Actinobacteriota	AbiD__AbiD	957	defense-finder-models/DefenseFinder_1/AbiD/AbiD	UserReplicon_AbiD_1	1	1	1	1	1	AbiD__AbiD	mandatory	334	2.6e-57	191.2	0.92	0.949	15	331
Bacteria	WP_013242677.1	GCF_002155265.1	Actinobacteriota	Mokosh_TypeI__MkoB	1150	defense-finder-models/DefenseFinder_4/Mokosh/Mokosh_TypeI	UserReplicon_Mokosh_TypeI_1	1	1	1	2	1	Mokosh_TypeI__MkoB	mandatory	497	1.5e-07	27.8	0.193	0.245	328	449
Bacteria	WP_013242683.1	GCF_002155265.1	Actinobacteriota	Mokosh_TypeI__MkoA	1153	defense-finder-models/DefenseFinder_4/Mokosh/Mokosh_TypeI	UserReplicon_Mokosh_TypeI_1	1	1	1	2	1	Mokosh_TypeI__MkoA	mandatory	749	3.1e-19	65.5	0.254	0.355	106	371
Bacteria	WP_013389439.1	GCF_001025135.1	Actinobacteriota	AbiD__AbiD	749	defense-finder-models/DefenseFinder_1/AbiD/AbiD	UserReplicon_AbiD_1	1	1	1	1	1	AbiD__AbiD	mandatory	317	1e-64	215.6	0.814	0.852	25	294
Bacteria	WP_013582597.1	GCF_000196555.1	Actinobacteriota	RM_Type_IIG__Type_IIG	1363	defense-finder-models/RM/RM/RM_Type_IIG	UserReplicon_RM_Type_IIG_1	1	1	1	1	1	RM_Type_IIG__Type_IIG	mandatory	932	5e-262	868.6	0.998	0.996	3	930
Bacteria	WP_013582690.1	GCF_000196555.1	Actinobacteriota	RM_Type_IIG__Type_IIG	1418	defense-finder-models/RM/RM/RM_Type_IIG	UserReplicon_RM_Type_IIG_2	1	1	1	1	1	RM_Type_IIG__Type_IIG	mandatory	600	9.4e-126	418.2	0.692	0.928	5	561
Bacteria	WP_014318590.1	GCF_001457455.1	Actinobacteriota	SoFic__SoFic	1171	defense-finder-models/DefenseFinder_5/SoFIC/SoFic	UserReplicon_SoFic_1	1	1	1	1	1	SoFic__SoFic	mandatory	385	2.4e-105	349.7	0.975	0.912	34	384
Bacteria	WP_014318675.1	GCF_001457455.1	Actinobacteriota	RM_Type_IIG__Type_IIG	1234	defense-finder-models/RM/RM/RM_Type_IIG	UserReplicon_RM_Type_IIG_3	1	1	1	1	1	RM_Type_IIG__Type_IIG	mandatory	377	3.6e-101	336.5	0.353	0.889	7	341
Bacteria	WP_014319245.1	GCF_001457455.1	Actinobacteriota	RM_Type_IIG__Type_IIG	1692	defense-finder-models/RM/RM/RM_Type_IIG	UserReplicon_RM_Type_IIG_4	1	1	1	1	1	RM_Type_IIG__Type_IIG	mandatory	929	5.9e-276	915	1	0.991	9	929
Bacteria	WP_014319374.1	GCF_001457455.1	Actinobacteriota	Mokosh_TypeI__MkoB	1785	defense-finder-models/DefenseFinder_4/Mokosh/Mokosh_TypeI	UserReplicon_Mokosh_TypeI_1	1	1	1	2	1	Mokosh_TypeI__MkoB	mandatory	477	1.5e-09	34.5	0.215	0.296	101	241
Bacteria	WP_014319378.1	GCF_001457455.1	Actinobacteriota	Mokosh_TypeI__MkoA	1788	defense-finder-models/DefenseFinder_4/Mokosh/Mokosh_TypeI	UserReplicon_Mokosh_TypeI_1	1	1	1	2	1	Mokosh_TypeI__MkoA	mandatory	720	2.5e-15	52.7	0.255	0.347	98	347
Bacteria	WP_014319513.1	GCF_001457455.1	Actinobacteriota	AbiL__AbiLii2	1883	defense-finder-models/DefenseFinder_1/AbiL/AbiL	UserReplicon_AbiL_3	1	1	1	2	1	AbiL__AbiLii	mandatory	199	1.6e-11	41.2	0.252	0.387	67	143
Bacteria	WP_014319514.1	GCF_001457455.1	Actinobacteriota	AbiL__AbiLi2	1884	defense-finder-models/DefenseFinder_1/AbiL/AbiL	UserReplicon_AbiL_3	1	1	1	2	1	AbiL__AbiLi	mandatory	443	1.8e-23	80.5	0.321	0.352	279	434
Bacteria	WP_014319515.1	GCF_001457455.1	Actinobacteriota	RM__Type_I_S	1885	defense-finder-models/RM/RM/RM_Type_I	UserReplicon_RM_Type_I_1	1	1	1	2.5	1	RM__Type_I_S	accessory	446	1.3e-69	232.5	0.563	0.939	27	445
Bacteria	WP_014319516.1	GCF_001457455.1	Actinobacteriota	RM__Type_I_MTases	1886	defense-finder-models/RM/RM/RM_Type_I	UserReplicon_RM_Type_I_1	1	1	1	2.5	1	RM__Type_I_MTases	mandatory	469	5.6e-193	639.2	0.959	0.994	1	466
Bacteria	WP_014319517.1	GCF_001457455.1	Actinobacteriota	RM__Type_I_REases	1887	defense-finder-models/RM/RM/RM_Type_I	UserReplicon_RM_Type_I_1	1	1	1	2.5	1	RM__Type_I_REases	mandatory	1084	2.1e-174	579.2	0.848	0.821	185	1074
Bacteria	WP_014319560.1	GCF_001457455.1	Actinobacteriota	RM__Type_I_REases	1922	defense-finder-models/RM/RM/RM_Type_I	UserReplicon_RM_Type_I_2	1	1	1	2.5	1	RM__Type_I_REases	mandatory	1066	5.5e-191	634.4	0.992	0.971	2	1036
Bacteria	WP_014319561.1	GCF_001457455.1	Actinobacteriota	RM__Type_I_S	1923	defense-finder-models/RM/RM/RM_Type_I	UserReplicon_RM_Type_I_2	1	1	1	2.5	1	RM__Type_I_S	accessory	406	3.2e-36	121.7	0.57	0.941	5	386
Bacteria	WP_014319562.1	GCF_001457455.1	Actinobacteriota	RM__Type_I_MTases	1924	defense-finder-models/RM/RM/RM_Type_I	UserReplicon_RM_Type_I_2	1	1	1	2.5	1	RM__Type_I_MTases	mandatory	535	3.2e-168	557.8	0.984	0.976	13	534
Bacteria	WP_014401043.1	GCF_002155265.1	Actinobacteriota	Abi2__Abi_2	1599	defense-finder-models/DefenseFinder_1/Abi2/Abi2	UserReplicon_Abi2_1	1	1	1	1	1	Abi2__Abi_2	mandatory	273	3.8e-21	73.1	0.978	0.773	30	240
Bacteria	WP_014522367.1	GCF_002155265.1	Actinobacteriota	RM_Type_IIG__Type_IIG	1805	defense-finder-models/RM/RM/RM_Type_IIG	UserReplicon_RM_Type_IIG_1	1	1	1	1	1	RM_Type_IIG__Type_IIG	mandatory	1648	1.7e-277	920.9	1.239	0.997	4	1646
Bacteria	WP_014522909.1	GCF_002155265.1	Actinobacteriota	AbiD__AbiD	1908	defense-finder-models/DefenseFinder_1/AbiD/AbiD	UserReplicon_AbiD_2	1	1	1	1	1	AbiD__AbiD	mandatory	314	7.6e-72	239.2	0.92	0.99	1	311
Bacteria	WP_014697275.1	GCF_000260715.1	Actinobacteriota	RM_Type_IV__Type_IV_REases	368	defense-finder-models/RM/RM/RM_Type_IV	UserReplicon_RM_Type_IV_1	1	1	1	1	1	RM_Type_IV__Type_IV_REases	mandatory	612	3.9e-54	181.2	0.648	0.547	250	584
Bacteria	WP_014697367.1	GCF_000260715.1	Actinobacteriota	Wadjet__JetA_I	435	defense-finder-models/DefenseFinder_2/Wadjet/Wadjet_I	UserReplicon_Wadjet_I_2	1	1	1	4	1	Wadjet__JetA_I	mandatory	524	8.7e-114	377.6	0.992	0.979	1	513
Bacteria	WP_014697368.1	GCF_000260715.1	Actinobacteriota	Wadjet__JetB_I	436	defense-finder-models/DefenseFinder_2/Wadjet/Wadjet_I	UserReplicon_Wadjet_I_2	1	1	1	4	1	Wadjet__JetB_I	mandatory	269	3.3e-52	173.6	0.942	0.877	30	265
Bacteria	WP_014697369.1	GCF_000260715.1	Actinobacteriota	Wadjet__JetC_I	437	defense-finder-models/DefenseFinder_2/Wadjet/Wadjet_I	UserReplicon_Wadjet_I_2	1	1	1	4	1	Wadjet__JetC_I	mandatory	1165	1e-275	914.1	0.978	0.97	14	1143
Bacteria	WP_014697370.1	GCF_000260715.1	Actinobacteriota	Wadjet__JetD_I	438	defense-finder-models/DefenseFinder_2/Wadjet/Wadjet_I	UserReplicon_Wadjet_I_2	1	1	1	4	1	Wadjet__JetD_I	mandatory	406	4.2e-96	318.9	0.985	0.953	1	387
Bacteria	WP_014697716.1	GCF_000260715.1	Actinobacteriota	BREX__brxA_DUF1819	715	defense-finder-models/DefenseFinder_5/BREX/BREX_I	UserReplicon_BREX_I_2	1	1	1	4	1	BREX__brxA_DUF1819	accessory	179	1.2e-30	103.2	0.739	0.765	6	142
Bacteria	WP_014697717.1	GCF_000260715.1	Actinobacteriota	BREX__brxB_DUF1788	716	defense-finder-models/DefenseFinder_5/BREX/BREX_I	UserReplicon_BREX_I_2	1	1	1	4	1	BREX__brxB_DUF1788	accessory	235	2.7e-31	104.7	0.992	0.6	88	228
Bacteria	WP_014697718.1	GCF_000260715.1	Actinobacteriota	BREX__brxC	717	defense-finder-models/DefenseFinder_5/BREX/BREX_I	UserReplicon_BREX_I_2	1	1	1	4	1	BREX__brxC	accessory	1212	0	1042.4	0.964	0.996	5	1211
Bacteria	WP_014697719.1	GCF_000260715.1	Actinobacteriota	BREX__pglX1	718	defense-finder-models/DefenseFinder_5/BREX/BREX_I	UserReplicon_BREX_I_2	1	1	1	4	1	BREX__pglX1	accessory	1206	0	1364.8	0.912	0.991	1	1195
Bacteria	WP_014697720.1	GCF_000260715.1	Actinobacteriota	BREX__pglZA	719	defense-finder-models/DefenseFinder_5/BREX/BREX_I	UserReplicon_BREX_I_2	1	1	1	4	1	BREX__pglZB	mandatory	880	1.5e-235	781	0.992	0.985	4	870
Bacteria	WP_014697721.1	GCF_000260715.1	Actinobacteriota	BREX__brxL	720	defense-finder-models/DefenseFinder_5/BREX/BREX_I	UserReplicon_BREX_I_2	1	1	1	4	1	BREX__brxL	mandatory	722	1.4e-285	945.8	0.848	0.99	5	719
Bacteria	WP_014698188.1	GCF_000260715.1	Actinobacteriota	Cas__cas2_I-E_1	1100	defense-finder-models/Cas/Cas/CAS_Class1-Subtype-I-E	UserReplicon_CAS_Class1-Subtype-I-E_1	1	1	0.875	7	1	Cas__cas2_I-E_1	accessory	121	8.1e-36	118.5	1	0.702	1	85
Bacteria	WP_014698189.1	GCF_000260715.1	Actinobacteriota	Cas__cas1_I-E_1	1101	defense-finder-models/Cas/Cas/CAS_Class1-Subtype-I-E	UserReplicon_CAS_Class1-Subtype-I-E_1	1	1	0.875	7	1	Cas__cas1_I-E_1	mandatory	322	1.4e-100	332.3	1	0.811	18	278
Bacteria	WP_014698190.1	GCF_000260715.1	Actinobacteriota	Cas__cas6e_I_II_III_IV_V_VI_3	1102	defense-finder-models/Cas/Cas/CAS_Class1-Subtype-I-E	UserReplicon_CAS_Class1-Subtype-I-E_1	1	1	0.875	7	1	Cas__cas6e_I_II_III_IV_V_VI_1	mandatory	224	5.4e-47	157.2	0.995	0.951	4	216
Bacteria	WP_014698192.1	GCF_000260715.1	Actinobacteriota	Cas__cas7_I-E_16	1103	defense-finder-models/Cas/Cas/CAS_Class1-Subtype-I-E	UserReplicon_CAS_Class1-Subtype-I-E_1	1	1	0.875	7	1	Cas__cas7_I-E_16	mandatory	392	2.5e-117	388.8	0.994	0.949	8	379
Bacteria	WP_014698193.1	GCF_000260715.1	Actinobacteriota	Cas__cse2gr11_I-E_8	1104	defense-finder-models/Cas/Cas/CAS_Class1-Subtype-I-E	UserReplicon_CAS_Class1-Subtype-I-E_1	1	1	0.875	7	1	Cas__cse2gr11_I-E_2	mandatory	222	8e-28	94.1	0.986	0.707	52	208
Bacteria	WP_014698194.1	GCF_000260715.1	Actinobacteriota	Cas__cas8e_I-E_5	1105	defense-finder-models/Cas/Cas/CAS_Class1-Subtype-I-E	UserReplicon_CAS_Class1-Subtype-I-E_1	1	1	0.875	7	1	Cas__cas8e_I-E_1	mandatory	561	6.6e-107	354.8	0.989	0.859	22	503
Bacteria	WP_014698195.1	GCF_000260715.1	Actinobacteriota	Cas__cas3_I_2	1106	defense-finder-models/Cas/Cas/CAS_Class1-Subtype-I-E	UserReplicon_CAS_Class1-Subtype-I-E_1	1	1	0.875	7	1	Cas__cas3_I_5	accessory	1054	1.6e-56	188.3	0.909	0.419	325	766
Bacteria	WP_015759791.1	GCF_000024265.1	Actinobacteriota	Wadjet__JetC_I	1295	defense-finder-models/DefenseFinder_2/Wadjet/Wadjet_I	UserReplicon_Wadjet_I_2	1	1	0.75	3	1	Wadjet__JetC_I	mandatory	1136	4.2e-271	899.9	0.984	0.98	13	1125
Bacteria	WP_015759792.1	GCF_000024265.1	Actinobacteriota	Wadjet__JetB_I	1296	defense-finder-models/DefenseFinder_2/Wadjet/Wadjet_I	UserReplicon_Wadjet_I_2	1	1	0.75	3	1	Wadjet__JetB_I	mandatory	227	1.6e-45	152.8	0.843	0.934	14	225
Bacteria	WP_015759793.1	GCF_000024265.1	Actinobacteriota	Wadjet__JetA_I	1297	defense-finder-models/DefenseFinder_2/Wadjet/Wadjet_I	UserReplicon_Wadjet_I_2	1	1	0.75	3	1	Wadjet__JetA_I	mandatory	492	5.1e-107	356.3	0.982	0.986	7	491
Bacteria	WP_015760611.1	GCF_000024265.1	Actinobacteriota	RM__Type_I_REases	1990	defense-finder-models/RM/RM/RM_Type_I	UserReplicon_RM_Type_I_1	1	1	1	2.5	1	RM__Type_I_REases	mandatory	1142	2.6e-211	701.7	0.924	0.907	43	1078
Bacteria	WP_015760612.1	GCF_000024265.1	Actinobacteriota	RM__Type_I_S	1991	defense-finder-models/RM/RM/RM_Type_I	UserReplicon_RM_Type_I_1	1	1	1	2.5	1	RM__Type_I_S	accessory	395	1.4e-50	170.3	0.508	0.982	4	391
Bacteria	WP_015760613.1	GCF_000024265.1	Actinobacteriota	RM__Type_I_MTases	1992	defense-finder-models/RM/RM/RM_Type_I	UserReplicon_RM_Type_I_1	1	1	1	2.5	1	RM__Type_I_MTases	mandatory	691	1e-192	639.4	1.275	0.987	6	687
Bacteria	WP_015760614.1	GCF_000024265.1	Actinobacteriota	Abi2__Abi_2	1993	defense-finder-models/DefenseFinder_1/Abi2/Abi2	UserReplicon_Abi2_1	1	1	1	1	1	Abi2__Abi_2	mandatory	321	4.1e-21	73.5	0.966	0.536	47	218
Bacteria	WP_015760669.1	GCF_000024265.1	Actinobacteriota	Eleos__LeoA	2039	defense-finder-models/DefenseFinder_5/Eleos/Eleos	UserReplicon_Eleos_1	1	1	0.5	2	1	Eleos__LeoA	mandatory	436	3.4e-08	30.3	0.186	0.257	192	303
Bacteria	WP_015760871.1	GCF_000024265.1	Actinobacteriota	Cas__cas1_I_II_III_IV_V_VI_6	2200	defense-finder-models/Cas/Cas/CAS_Class1-Subtype-I-C	UserReplicon_CAS_Class1-Subtype-I-C_1	1	1	0.857	6	1	Cas__cas1_I_II_III_IV_V_VI_6	accessory	343	6.5e-143	473.4	1	0.985	4	341
Bacteria	WP_015760872.1	GCF_000024265.1	Actinobacteriota	Cas__cas4_I_II_III_IV_V_VI_6	2201	defense-finder-models/Cas/Cas/CAS_Class1-Subtype-I-C	UserReplicon_CAS_Class1-Subtype-I-C_1	1	1	0.857	6	1	Cas__cas4_I_II_III_IV_V_VI_1	accessory	220	7.7e-39	130.9	0.994	0.864	10	199
Bacteria	WP_015760873.1	GCF_000024265.1	Actinobacteriota	Cas__cas7b_I-B_I-C_2	2202	defense-finder-models/Cas/Cas/CAS_Class1-Subtype-I-C	UserReplicon_CAS_Class1-Subtype-I-C_1	1	1	0.857	6	1	Cas__cas7b_I-B_I-C_2	accessory	299	6.6e-106	351	1	0.933	7	285
Bacteria	WP_015760874.1	GCF_000024265.1	Actinobacteriota	Cas__cas8c_I-C_4	2203	defense-finder-models/Cas/Cas/CAS_Class1-Subtype-I-C	UserReplicon_CAS_Class1-Subtype-I-C_1	1	1	0.857	6	1	Cas__cas8c_I-C_4	mandatory	582	5.9e-161	534.2	1	0.978	6	574
Bacteria	WP_015760875.1	GCF_000024265.1	Actinobacteriota	Cas__cas5_I-C_11	2204	defense-finder-models/Cas/Cas/CAS_Class1-Subtype-I-C	UserReplicon_CAS_Class1-Subtype-I-C_1	1	1	0.857	6	1	Cas__cas5_I-C_11	mandatory	220	5.8e-78	258.8	0.995	0.95	5	213
Bacteria	WP_015760876.1	GCF_000024265.1	Actinobacteriota	Cas__cas3_I_5	2205	defense-finder-models/Cas/Cas/CAS_Class1-Subtype-I-C	UserReplicon_CAS_Class1-Subtype-I-C_1	1	1	0.857	6	1	Cas__cas3_I_5	accessory	732	2.1e-54	182.5	0.466	0.455	229	561
Bacteria	WP_021647848.1	GCF_001025135.1	Actinobacteriota	RM__Type_I_REases	1056	defense-finder-models/RM/RM/RM_Type_I	UserReplicon_RM_Type_I_1	1	1	0.667	2	1	RM__Type_I_REases	mandatory	1039	1e-218	725.8	0.991	0.955	26	1017
Bacteria	WP_021647849.1	GCF_001025135.1	Actinobacteriota	RM__Type_I_MTases	1057	defense-finder-models/RM/RM/RM_Type_I	UserReplicon_RM_Type_I_1	1	1	0.667	2	1	RM__Type_I_MTases	mandatory	502	4.7e-176	583.3	0.98	0.974	12	500
Bacteria	WP_021648669.1	GCF_001025135.1	Actinobacteriota	PD-T7-2__PD-T7-2_B	1383	defense-finder-models/DefenseFinder_3/PD-T7-2/PD-T7-2	UserReplicon_PD-T7-2_1	1	1	1	2	1	PD-T7-2__PD-T7-2_B	mandatory	397	1.5e-54	181.9	0.365	0.572	167	393
Bacteria	WP_021648671.1	GCF_001025135.1	Actinobacteriota	PD-T7-2__PD-T7-2_A	1385	defense-finder-models/DefenseFinder_3/PD-T7-2/PD-T7-2	UserReplicon_PD-T7-2_1	1	1	1	2	1	PD-T7-2__PD-T7-2_A	mandatory	340	1.9e-27	92.8	0.601	0.7	71	308
Bacteria	WP_021648675.1	GCF_001025135.1	Actinobacteriota	RM_Type_IIG__Type_IIG	1387	defense-finder-models/RM/RM/RM_Type_IIG	UserReplicon_RM_Type_IIG_2	1	1	1	1	1	RM_Type_IIG__Type_IIG	mandatory	1119	4.3e-178	591.1	0.661	0.897	13	1016
Bacteria	WP_026643313.1	GCF_000741295.1	Actinobacteriota	RM_Type_IIG__Type_IIG	341	defense-finder-models/RM/RM/RM_Type_IIG	UserReplicon_RM_Type_IIG_1	1	1	1	1	1	RM_Type_IIG__Type_IIG	mandatory	1127	4.3e-181	600.9	0.64	0.885	14	1010
Bacteria	WP_030305582.1	GCF_000719955.1	Actinobacteriota	AbiU__AbiU	3353	defense-finder-models/DefenseFinder_1/AbiU/AbiU	UserReplicon_AbiU_1	1	1	1	1	1	AbiU__AbiU	mandatory	579	6.3e-131	436.1	0.989	0.978	5	570
Bacteria	WP_030306328.1	GCF_000719955.1	Actinobacteriota	RM_Type_IIG__Type_IIG	3631	defense-finder-models/RM/RM/RM_Type_IIG	UserReplicon_RM_Type_IIG_1	1	1	1	1	1	RM_Type_IIG__Type_IIG	mandatory	1865	5.9e-178	593.2	1.164	0.996	1	1858
Bacteria	WP_030306335.1	GCF_000719955.1	Actinobacteriota	Menshen__NsnA	3634	defense-finder-models/DefenseFinder_4/Menshen/Menshen	UserReplicon_Menshen_1	1	1	1	3	1	Menshen__NsnA	mandatory	428	6.9e-126	418.8	0.951	0.883	47	424
Bacteria	WP_030306338.1	GCF_000719955.1	Actinobacteriota	Menshen__NsnB	3635	defense-finder-models/DefenseFinder_4/Menshen/Menshen	UserReplicon_Menshen_1	1	1	1	3	1	Menshen__NsnB	mandatory	395	3.7e-110	367.2	0.994	0.997	1	394
Bacteria	WP_030306339.1	GCF_000719955.1	Actinobacteriota	Menshen__NsnC_2507451963	3636	defense-finder-models/DefenseFinder_4/Menshen/Menshen	UserReplicon_Menshen_1	1	1	1	3	1	Menshen__NsnC_2507451963	mandatory	325	1.7e-91	305.3	0.993	0.985	1	320
Bacteria	WP_030307367.1	GCF_000719955.1	Actinobacteriota	Cas__cas3HD_I_1	4034	defense-finder-models/Cas/Cas/CAS_Class1-Subtype-I-E	UserReplicon_CAS_Class1-Subtype-I-E_1	1	1	0.625	5	1	CAS_Class1-Subtype-I-E__cas3HD_I-E_4	accessory	910	7.8e-18	63.4	0.97	0.241	21	239
Bacteria	WP_030307368.1	GCF_000719955.1	Actinobacteriota	Cas__cas8e_I-E_2	4035	defense-finder-models/Cas/Cas/CAS_Class1-Subtype-I-E	UserReplicon_CAS_Class1-Subtype-I-E_1	1	1	0.625	5	1	Cas__cas8e_I-E_1	mandatory	536	1.2e-76	257.1	0.992	0.897	7	487
Bacteria	WP_030307371.1	GCF_000719955.1	Actinobacteriota	Cas__cas7_I-E_16	4036	defense-finder-models/Cas/Cas/CAS_Class1-Subtype-I-E	UserReplicon_CAS_Class1-Subtype-I-E_1	1	1	0.625	5	1	Cas__cas7_I-E_16	mandatory	391	2.4e-108	361.2	0.994	0.949	8	378
Bacteria	WP_030307373.1	GCF_000719955.1	Actinobacteriota	Cas__cas5_I-E_13	4037	defense-finder-models/Cas/Cas/CAS_Class1-Subtype-I-E	UserReplicon_CAS_Class1-Subtype-I-E_1	1	1	0.625	5	1	Cas__cas5_I-E_3	mandatory	274	5.5e-51	171.3	0.95	0.599	9	172
Bacteria	WP_030307375.1	GCF_000719955.1	Actinobacteriota	Cas__cas6e_I_II_III_IV_V_VI_2	4038	defense-finder-models/Cas/Cas/CAS_Class1-Subtype-I-E	UserReplicon_CAS_Class1-Subtype-I-E_1	1	1	0.625	5	1	Cas__cas6e_I_II_III_IV_V_VI_1	mandatory	221	6.7e-44	148.9	1	0.982	3	219
Bacteria	WP_030309294.1	GCF_000719955.1	Actinobacteriota	Borvo__BovA	4829	defense-finder-models/DefenseFinder_5/Borvo/Borvo	UserReplicon_Borvo_1	1	1	1	1	1	Borvo__BovA	mandatory	1388	1.2e-07	29	0.124	0.07	1237	1333
Bacteria	WP_030309547.1	GCF_000719955.1	Actinobacteriota	RM_Type_IIG__Type_IIG	4919	defense-finder-models/RM/RM/RM_Type_IIG	UserReplicon_RM_Type_IIG_2	1	1	1	1	1	RM_Type_IIG__Type_IIG	mandatory	1357	1.4e-294	979.5	1.171	0.975	1	1323
Bacteria	WP_030309555.1	GCF_000719955.1	Actinobacteriota	Eleos__LeoBC	4920	defense-finder-models/DefenseFinder_5/Eleos/Eleos	UserReplicon_Eleos_2	1	1	0.5	2	1	Eleos__LeoBC	mandatory	988	2.5e-35	120.9	0.923	0.52	372	885
Bacteria	WP_030309557.1	GCF_000719955.1	Actinobacteriota	Eleos__LeoA	4921	defense-finder-models/DefenseFinder_5/Eleos/Eleos	UserReplicon_Eleos_2	1	1	0.5	2	1	Eleos__LeoA	mandatory	580	2.3e-46	157.3	0.886	0.907	47	572
Bacteria	WP_030309580.1	GCF_000719955.1	Actinobacteriota	RM_Type_IV__Type_IV_REases	4926	defense-finder-models/RM/RM/RM_Type_IV	UserReplicon_RM_Type_IV_3	1	1	1	1	1	RM_Type_IV__Type_IV_REases	mandatory	404	1.4e-62	211.4	0.798	0.963	5	393
Bacteria	WP_033502332.1	GCF_000741295.1	Actinobacteriota	RM_Type_IIG__Type_IIG	1121	defense-finder-models/RM/RM/RM_Type_IIG	UserReplicon_RM_Type_IIG_2	1	1	1	1	1	RM_Type_IIG__Type_IIG	mandatory	1688	4.1e-222	737	1.235	0.987	9	1674
Bacteria	WP_037638481.1	GCF_000719955.1	Actinobacteriota	RM_Type_IV__Type_IV_REases	5485	defense-finder-models/RM/RM/RM_Type_IV	UserReplicon_RM_Type_IV_4	1	1	1	1	1	RM_Type_IV__Type_IV_REases	mandatory	620	6.9e-54	182.3	0.596	0.381	358	593
Bacteria	WP_046253005.1	GCF_001632805.1	Actinobacteriota	Wadjet__JetA_I	1432	defense-finder-models/DefenseFinder_2/Wadjet/Wadjet_I	UserReplicon_Wadjet_I_2	1	1	0.75	3	1	Wadjet__JetA_I	mandatory	486	2.3e-90	302	0.97	0.961	10	476
Bacteria	WP_046253006.1	GCF_001632805.1	Actinobacteriota	Wadjet__JetB_I	1433	defense-finder-models/DefenseFinder_2/Wadjet/Wadjet_I	UserReplicon_Wadjet_I_2	1	1	0.75	3	1	Wadjet__JetB_I	mandatory	241	1.3e-59	199.5	0.86	0.9	23	239
Bacteria	WP_046253007.1	GCF_001632805.1	Actinobacteriota	Wadjet__JetC_I	1434	defense-finder-models/DefenseFinder_2/Wadjet/Wadjet_I	UserReplicon_Wadjet_I_2	1	1	0.75	3	1	Wadjet__JetC_I	mandatory	1121	2e-270	898.3	0.972	0.964	14	1094
Bacteria	WP_046255003.1	GCF_001632805.1	Actinobacteriota	Eleos__LeoA	3214	defense-finder-models/DefenseFinder_5/Eleos/Eleos	UserReplicon_Eleos_1	1	1	0.5	2	1	Eleos__LeoA	mandatory	500	2.2e-05	21.7	0.156	0.154	5	81
Bacteria	WP_046255004.1	GCF_001632805.1	Actinobacteriota	Eleos__LeoBC	3215	defense-finder-models/DefenseFinder_5/Eleos/Eleos	UserReplicon_Eleos_1	1	1	0.5	2	1	Eleos__LeoBC	mandatory	619	9.7e-15	52.6	0.747	0.695	144	573
Bacteria	WP_046255291.1	GCF_001632805.1	Actinobacteriota	RM_Type_IV__Type_IV_REases	3479	defense-finder-models/RM/RM/RM_Type_IV	UserReplicon_RM_Type_IV_1	1	1	1	1	1	RM_Type_IV__Type_IV_REases	mandatory	231	8.2e-17	60.2	0.235	0.472	95	203
Bacteria	WP_051592158.1	GCF_000741295.1	Actinobacteriota	RM_Type_IV__Type_IV_REases	1309	defense-finder-models/RM/RM/RM_Type_IV	UserReplicon_RM_Type_IV_3	1	1	1	1	1	RM_Type_IV__Type_IV_REases	mandatory	533	3.3e-57	191.4	0.696	0.632	169	505
Bacteria	WP_081252342.1	GCF_001632805.1	Actinobacteriota	RloC__RloC	4398	defense-finder-models/DefenseFinder_1/RloC/RloC	UserReplicon_RloC_1	1	1	1	1	1	RloC__RloC	mandatory	852	1.8e-111	372.2	0.978	0.897	83	846
Bacteria	WP_085379702.1	GCF_000010425.1	Actinobacteriota	AbiD__AbiD	1476	defense-finder-models/DefenseFinder_1/AbiD/AbiD	UserReplicon_AbiD_2	1	1	1	1	1	AbiD__AbiD	mandatory	294	5.3e-60	200	0.827	0.935	2	276
Bacteria	WP_225531761.1	GCF_000741295.1	Actinobacteriota	SoFic__SoFic	1473	defense-finder-models/DefenseFinder_5/SoFIC/SoFic	UserReplicon_SoFic_1	1	1	1	1	1	SoFic__SoFic	mandatory	411	7.4e-84	278.5	0.978	0.873	32	390
Bacteria	WP_229038266.1	GCF_001025215.1	Actinobacteriota	AbiD__AbiD	1735	defense-finder-models/DefenseFinder_1/AbiD/AbiD	UserReplicon_AbiD_2	1	1	1	1	1	AbiD__AbiD	mandatory	242	1.2e-33	113.6	0.684	0.938	1	227
Bacteria	WP_230863690.1	GCF_001457455.1	Actinobacteriota	AbiD__AbiD	2223	defense-finder-models/DefenseFinder_1/AbiD/AbiD	UserReplicon_AbiD_2	1	1	1	1	1	AbiD__AbiD	mandatory	216	3.8e-50	168.1	0.576	0.889	10	201
Bacteria	WP_231837086.1	GCF_000010425.1	Actinobacteriota	Lamassu-Fam__LmuB_SMC_hypothetical	1622	defense-finder-models/DefenseFinder_1/Lamassu-Fam/Lamassu-Fam	UserReplicon_Lamassu-Fam_3	1	1	0.667	2	2	Lamassu-Fam__LmuB_SMC_Cap4_nuclease_II	mandatory	258	1e-49	166	0.357	0.833	2	216
Bacteria	WP_231837088.1	GCF_000010425.1	Actinobacteriota	Lamassu-Fam__LmuA_effector_Mrr	1623	defense-finder-models/DefenseFinder_1/Lamassu-Fam/Lamassu-Fam	UserReplicon_Lamassu-Fam_3	1	1	0.667	2	2	Lamassu-Fam__LmuA_effector_Cap4_nuclease_II	mandatory	122	5.4e-41	138.1	0.345	0.975	2	120
Bacteria	WP_231837090.1	GCF_000010425.1	Actinobacteriota	Lamassu-Fam__LmuA_effector_hypothetical	1624	defense-finder-models/DefenseFinder_1/Lamassu-Fam/Lamassu-Fam	UserReplicon_Lamassu-Fam_3	1	1	0.667	2	2	Lamassu-Fam__LmuA_effector_Cap4_nuclease_II	mandatory	240	4.6e-10	36.1	0.557	0.812	13	207
Bacteria	HHF97972.1	GCA_011372105.1	Aerophobota	RM__Type_I_REases	113	defense-finder-models/RM/RM/RM_Type_I	UserReplicon_RM_Type_I_1	1	1	1	2.5	1	RM__Type_I_REases	mandatory	423	1.9e-68	227.8	0.457	0.948	6	406
Bacteria	HHF97973.1	GCA_011372105.1	Aerophobota	RM__Type_I_MTases	114	defense-finder-models/RM/RM/RM_Type_I	UserReplicon_RM_Type_I_1	1	1	1	2.5	1	RM__Type_I_MTases	mandatory	419	2.3e-109	362.3	0.777	0.988	2	415
Bacteria	HHF97976.1	GCA_011372105.1	Aerophobota	RM__Type_I_S	117	defense-finder-models/RM/RM/RM_Type_I	UserReplicon_RM_Type_I_1	1	1	1	2.5	1	RM__Type_I_S	accessory	160	1.5e-27	92.4	0.219	0.988	3	160
Bacteria	MBE0479035.1	GCA_014859225.1	Aerophobota	RM_Type_IIG__Type_IIG	1548	defense-finder-models/RM/RM/RM_Type_IIG	UserReplicon_RM_Type_IIG_1	1	1	1	1	1	RM_Type_IIG__Type_IIG	mandatory	930	1.1e-132	441.1	0.737	0.96	34	926
Bacteria	MQY59088.1	GCA_009618505.1	Aerophobota	AbiEii__AbiEii	1114	defense-finder-models/DefenseFinder_1/AbiE/AbiE	UserReplicon_AbiE_1	1	1	1	2	1	AbiEii__AbiEii	mandatory	79	2.9e-13	47.4	0.172	0.532	31	72
Bacteria	MQY59089.1	GCA_009618505.1	Aerophobota	AbiEii__AbiEi_4	1115	defense-finder-models/DefenseFinder_1/AbiE/AbiE	UserReplicon_AbiE_1	1	1	1	2	1	AbiEii__AbiEi_1	mandatory	216	4.7e-09	33.4	0.939	0.25	17	70
Bacteria	RLE10141.1	GCA_003648845.1	Aerophobota	Cas__cmr4gr7_III-B_III-C_1	157	defense-finder-models/Cas/Cas/CAS_Class1-Subtype-III-C	UserReplicon_CAS_Class1-Subtype-III-C_1	1	1	0.5	3	1	Cas__cmr4gr7_III-B_III-C_2	accessory	325	2.6e-28	96.3	0.996	0.945	10	316
Bacteria	RLE10142.1	GCA_003648845.1	Aerophobota	Cas__cmr5gr11_III-C_11	158	defense-finder-models/Cas/Cas/CAS_Class1-Subtype-III-C	UserReplicon_CAS_Class1-Subtype-III-C_1	1	1	0.5	3	1	Cas__cmr5gr11_III-C_11	accessory	152	6.4e-31	104.2	0.976	0.901	1	137
Bacteria	RLE10143.1	GCA_003648845.1	Aerophobota	Cas__cmr3gr5_III-C_1	159	defense-finder-models/Cas/Cas/CAS_Class1-Subtype-III-C	UserReplicon_CAS_Class1-Subtype-III-C_1	1	1	0.5	3	1	Cas__cmr3gr5_III-C_1	mandatory	301	8.7e-87	287.9	0.993	0.993	1	299
Bacteria	RLE13188.1	GCA_003648845.1	Aerophobota	Cas__cas4_I_II_III_IV_V_VI_6	1044	defense-finder-models/Cas/Cas/CAS_Cluster	UserReplicon_CAS_Cluster_4	1	1	0.06	3	1	Cas__cas4_I_II_III_IV_V_VI_1	mandatory	102	6.9e-31	104.4	0.621	0.98	2	101
Bacteria	RLE13190.1	GCA_003648845.1	Aerophobota	Cas__cas1_I_II_III_IV_V_VI_7	1046	defense-finder-models/Cas/Cas/CAS_Cluster	UserReplicon_CAS_Cluster_4	1	1	0.06	3	1	Cas__cas1_I_II_III_IV_V_VI_1	mandatory	331	4.1e-139	460.1	0.997	0.979	4	327
Bacteria	RLE13191.1	GCA_003648845.1	Aerophobota	Cas__cas2_I_II_III_IV_V_VI_5	1047	defense-finder-models/Cas/Cas/CAS_Cluster	UserReplicon_CAS_Cluster_4	1	1	0.06	3	1	Cas__cas2_I_II_III_IV_V_VI_1	mandatory	87	1.8e-31	105.2	0.989	0.989	1	86
Bacteria	RLE15093.1	GCA_003648845.1	Aerophobota	RM__Type_I_MTases	1765	defense-finder-models/RM/RM/RM_Type_I	UserReplicon_RM_Type_I_1	1	1	1	2.5	1	RM__Type_I_MTases	mandatory	513	1.4e-142	473.1	0.988	0.973	10	508
Bacteria	RLE15094.1	GCA_003648845.1	Aerophobota	RM__Type_I_S	1766	defense-finder-models/RM/RM/RM_Type_I	UserReplicon_RM_Type_I_1	1	1	1	2.5	1	RM__Type_I_S	accessory	422	6.3e-95	315.2	0.585	0.976	10	421
Bacteria	RLE15096.1	GCA_003648845.1	Aerophobota	RM__Type_I_REases	1768	defense-finder-models/RM/RM/RM_Type_I	UserReplicon_RM_Type_I_1	1	1	1	2.5	1	RM__Type_I_REases	mandatory	1001	2.4e-162	539.3	0.991	0.98	1	981
Bacteria	RLE15100.1	GCA_003648845.1	Aerophobota	pAgo__pAgo_LongA	1772	defense-finder-models/DefenseFinder_5/pAgo/pAgo	UserReplicon_pAgo_1	1	1	1	1	1	pAgo__pAgo_LongA	mandatory	466	1.9e-45	152.2	0.512	0.927	5	436
Bacteria	TKJ45133.1	GCA_005223085.1	Aerophobota	Borvo__BovA	989	defense-finder-models/DefenseFinder_5/Borvo/Borvo	UserReplicon_Borvo_1	1	1	1	1	1	Borvo__BovA	mandatory	188	0.00082	14.7	0.147	0.622	24	140
Bacteria	TKJ45640.1	GCA_005223085.1	Aerophobota	RM_Type_II__Type_II_REases	1390	defense-finder-models/RM/RM/RM_Type_II	UserReplicon_RM_Type_II_1	1	1	1	2	1	RM_Type_II__Type_II_REases	mandatory	261	4.6e-47	158.1	1.16	0.969	5	257
Bacteria	TKJ45641.1	GCA_005223085.1	Aerophobota	RM_Type_II__Type_II_MTases	1391	defense-finder-models/RM/RM/RM_Type_II	UserReplicon_RM_Type_II_1	1	1	1	2	1	RM_Type_II__Type_II_MTases	mandatory	447	2.3e-21	73.4	0.404	0.336	296	445
Bacteria	TKJ46885.1	GCA_005223095.1	Aerophobota	AbiEii__AbiEi_2	996	defense-finder-models/DefenseFinder_1/AbiE/AbiE	UserReplicon_AbiE_1	1	1	1	2	1	AbiEii__AbiEi_1	mandatory	351	3.9e-08	30.7	0.972	0.422	200	347
Bacteria	TKJ46887.1	GCA_005223095.1	Aerophobota	AbiEii__AbiEii	998	defense-finder-models/DefenseFinder_1/AbiE/AbiE	UserReplicon_AbiE_1	1	1	1	2	1	AbiEii__AbiEii	mandatory	323	1.2e-30	104.3	0.933	0.715	42	272
Bacteria	TKJ47821.1	GCA_005223095.1	Aerophobota	AbiEii__AbiEii	1932	defense-finder-models/DefenseFinder_1/AbiE/AbiE	UserReplicon_AbiE_2	1	1	1	2	1	AbiEii__AbiEii	mandatory	292	7.2e-29	98.5	0.904	0.764	42	264
Bacteria	TKJ47822.1	GCA_005223095.1	Aerophobota	AbiEii__AbiEi_1	1933	defense-finder-models/DefenseFinder_1/AbiE/AbiE	UserReplicon_AbiE_2	1	1	1	2	1	AbiEii__AbiEi_1	mandatory	265	5.8e-09	33.4	0.944	0.517	84	220
Bacteria	TKJ48042.1	GCA_005223095.1	Aerophobota	SoFic__SoFic	2153	defense-finder-models/DefenseFinder_5/SoFIC/SoFic	UserReplicon_SoFic_1	1	1	1	1	1	SoFic__SoFic	mandatory	375	2.5e-109	362.9	0.983	0.965	13	374
Bacteria	TKJ48110.1	GCA_005223095.1	Aerophobota	Lamassu-Fam__LmuA_effector_Amidase	2221	defense-finder-models/DefenseFinder_1/Lamassu-Fam/Lamassu-Fam	UserReplicon_Lamassu-Fam_3	1	1	0.667	2	1	Lamassu-Fam__LmuA_effector_Cap4_nuclease_II	mandatory	618	5.4e-44	147.5	0.795	0.773	4	481
Bacteria	TKJ48111.1	GCA_005223095.1	Aerophobota	Lamassu-Fam__LmuB_SMC_Amidase	2222	defense-finder-models/DefenseFinder_1/Lamassu-Fam/Lamassu-Fam	UserReplicon_Lamassu-Fam_3	1	1	0.667	2	1	Lamassu-Fam__LmuB_SMC_Cap4_nuclease_II	mandatory	1268	1.7e-117	390.8	0.952	0.941	62	1254
Bacteria	HHJ63736.1	GCA_011375045.1	Aquificota	Cas__cas8b1_I-B_14	470	defense-finder-models/Cas/Cas/CAS_Class1-Subtype-I-B	UserReplicon_CAS_Class1-Subtype-I-B_1	1	1	0.25	2	1	Cas__cas8b2_I-B_2	mandatory	619	1.1e-97	324.8	1	0.984	1	609
Bacteria	HHJ63737.1	GCA_011375045.1	Aquificota	Cas__cas6_I_II_III_IV_V_VI_14	471	defense-finder-models/Cas/Cas/CAS_Class1-Subtype-I-B	UserReplicon_CAS_Class1-Subtype-I-B_1	1	1	0.25	2	1	Cas__cas6_I-B_III_1	accessory	242	2.7e-41	138.8	0.971	0.983	1	238
Bacteria	HHJ64846.1	GCA_011375045.1	Aquificota	RM_Type_II__Type_II_MTases	1580	defense-finder-models/RM/RM/RM_Type_II	UserReplicon_RM_Type_II_1	1	1	1	2	1	RM_Type_II__Type_II_MTases	mandatory	368	1.3e-160	531.6	0.989	0.962	5	358
Bacteria	HHJ64847.1	GCA_011375045.1	Aquificota	RM_Type_II__Type_II_REases	1581	defense-finder-models/RM/RM/RM_Type_II	UserReplicon_RM_Type_II_1	1	1	1	2	1	RM_Type_II__Type_II_REases	mandatory	262	2.6e-59	198.1	1.023	0.996	1	261
Bacteria	HIE59135.1	GCA_012961365.1	Aquificota	Cas__cas3_I_2	802	defense-finder-models/Cas/Cas/CAS_Cluster	UserReplicon_CAS_Cluster_7	1	1	0.06	3	1	Cas__cas3_I_5	neutral	345	4e-47	157.7	0.473	0.496	20	190
Bacteria	HIE59136.1	GCA_012961365.1	Aquificota	Cas__cas4_I_II_III_IV_V_VI_6	803	defense-finder-models/Cas/Cas/CAS_Cluster	UserReplicon_CAS_Cluster_7	1	1	0.06	3	1	Cas__cas4_I_II_III_IV_V_VI_1	mandatory	170	7.1e-55	182.2	0.994	0.924	13	169
Bacteria	HIE59137.1	GCA_012961365.1	Aquificota	Cas__cas1_I_II_III_IV_V_VI_7	804	defense-finder-models/Cas/Cas/CAS_Cluster	UserReplicon_CAS_Cluster_7	1	1	0.06	3	1	Cas__cas1_I_II_III_IV_V_VI_1	mandatory	331	2.1e-133	441.2	0.997	0.979	5	328
Bacteria	HIE59138.1	GCA_012961365.1	Aquificota	Cas__cas2_I_II_III_IV_V_VI_3	805	defense-finder-models/Cas/Cas/CAS_Cluster	UserReplicon_CAS_Cluster_7	1	1	0.06	3	1	Cas__cas2_I_II_III_IV_V_VI_1	mandatory	88	8e-28	93.2	1	0.898	3	81
Bacteria	HIE59796.1	GCA_012961365.1	Aquificota	Cas__cmr1gr7_III-B_1	1463	defense-finder-models/Cas/Cas/CAS_Class1-Subtype-III-B	UserReplicon_CAS_Class1-Subtype-III-B_2	1	1	0.857	6	1	Cas__cmr1gr7_III-B_1	mandatory	416	9.5e-34	113.7	0.898	0.882	2	368
Bacteria	HIE59797.1	GCA_012961365.1	Aquificota	Cas__cas10_III_6	1464	defense-finder-models/Cas/Cas/CAS_Class1-Subtype-III-B	UserReplicon_CAS_Class1-Subtype-III-B_2	1	1	0.857	6	1	Cas__cas10_III_1	accessory	708	1.6e-58	195.1	0.68	0.833	3	592
Bacteria	HIE59799.1	GCA_012961365.1	Aquificota	Cas__cmr3gr5_III-B_III-C_5	1466	defense-finder-models/Cas/Cas/CAS_Class1-Subtype-III-B	UserReplicon_CAS_Class1-Subtype-III-B_2	1	1	0.857	6	1	Cas__cmr3gr5_III-B_III-C_5	accessory	345	1.2e-18	64.3	0.81	0.849	45	337
Bacteria	HIE59800.1	GCA_012961365.1	Aquificota	Cas__cmr4gr7_III-B_III-C_2	1467	defense-finder-models/Cas/Cas/CAS_Class1-Subtype-III-B	UserReplicon_CAS_Class1-Subtype-III-B_2	1	1	0.857	6	1	Cas__cmr4gr7_III-B_III-C_2	accessory	299	4.8e-68	226.5	0.98	0.977	5	296
Bacteria	HIE59801.1	GCA_012961365.1	Aquificota	Cas__cmr5gr11_III-B_18	1468	defense-finder-models/Cas/Cas/CAS_Class1-Subtype-III-B	UserReplicon_CAS_Class1-Subtype-III-B_2	1	1	0.857	6	1	Cas__cmr5gr11_III-B_18	mandatory	164	2.8e-28	95.3	1	0.945	5	159
Bacteria	HIE59802.1	GCA_012961365.1	Aquificota	Cas__cmr6gr7_III-B_3	1469	defense-finder-models/Cas/Cas/CAS_Class1-Subtype-III-B	UserReplicon_CAS_Class1-Subtype-III-B_2	1	1	0.857	6	1	Cas__cmr6gr7_III-B_1	mandatory	186	1e-21	74.4	0.471	0.683	55	181
Bacteria	HIE59919.1	GCA_012961365.1	Aquificota	RM_Type_II__Type_II_REases	1586	defense-finder-models/RM/RM/RM_Type_II	UserReplicon_RM_Type_II_1	1	1	1	2	1	RM_Type_II__Type_II_REases	mandatory	339	3.6e-75	250.2	1.08	0.973	10	339
Bacteria	HIE59920.1	GCA_012961365.1	Aquificota	RM_Type_II__Type_II_MTases	1587	defense-finder-models/RM/RM/RM_Type_II	UserReplicon_RM_Type_II_1	1	1	1	2	1	RM_Type_II__Type_II_MTases	mandatory	443	2.1e-99	329.5	0.833	0.93	2	413
Bacteria	HIE59964.1	GCA_012961365.1	Aquificota	Cas__cmr6gr7_III-B_3	1631	defense-finder-models/Cas/Cas/CAS_Cluster	UserReplicon_CAS_Cluster_9	1	1	0.1	5	1	Cas__cmr6gr7_III-B_1	mandatory	209	1.2e-43	146.3	0.58	0.99	1	207
Bacteria	HIE59965.1	GCA_012961365.1	Aquificota	Cas__cas6_I_II_III_IV_V_VI_7	1632	defense-finder-models/Cas/Cas/CAS_Cluster	UserReplicon_CAS_Cluster_9	1	1	0.1	5	1	Cas__cas6_I_II_III_IV_V_VI_7	mandatory	265	7.7e-33	111.2	1	0.823	45	262
Bacteria	HIE59966.1	GCA_012961365.1	Aquificota	Cas__cas8b2_I-B_2	1633	defense-finder-models/Cas/Cas/CAS_Cluster	UserReplicon_CAS_Cluster_9	1	1	0.1	5	1	Cas__cas8b2_I-B_2	mandatory	574	7.6e-124	410	1	0.584	230	564
Bacteria	HIE59967.1	GCA_012961365.1	Aquificota	Cas__cas7_I-B_6	1634	defense-finder-models/Cas/Cas/CAS_Cluster	UserReplicon_CAS_Cluster_9	1	1	0.1	5	1	Cas__cas7_I-B_6	mandatory	314	2.6e-84	279.7	0.99	0.924	13	302
Bacteria	HIE59968.1	GCA_012961365.1	Aquificota	Cas__cas5_I-B_6	1635	defense-finder-models/Cas/Cas/CAS_Cluster	UserReplicon_CAS_Cluster_9	1	1	0.1	5	1	Cas__cas5_I-B_1	mandatory	245	2.7e-54	180.7	1	0.845	4	210
Bacteria	HIE59969.1	GCA_012961365.1	Aquificota	Cas__cas3_I_2	1636	defense-finder-models/Cas/Cas/CAS_Cluster	UserReplicon_CAS_Cluster_9	1	1	0.1	5	1	Cas__cas3_I_5	neutral	432	2.1e-28	96.1	0.482	0.398	255	426
Bacteria	PMP76606.1	GCA_002878035.1	Aquificota	Cas__csm4gr5_III-A_2	370	defense-finder-models/Cas/Cas/CAS_Class1-Subtype-III-A	UserReplicon_CAS_Class1-Subtype-III-A_1	1	1	0.222	2	1	Cas__csm4gr5_III-A_2	mandatory	138	2.1e-11	39.9	0.407	0.942	6	135
Bacteria	PMP76607.1	GCA_002878035.1	Aquificota	Cas__csm5gr7_III-A_2	371	defense-finder-models/Cas/Cas/CAS_Class1-Subtype-III-A	UserReplicon_CAS_Class1-Subtype-III-A_1	1	1	0.222	2	1	Cas__csm5gr7_III-A_2	mandatory	381	2.6e-41	138.4	0.94	0.953	3	365
Bacteria	PMP77367.1	GCA_002878035.1	Aquificota	Cas__cas10_III-A_1	835	defense-finder-models/Cas/Cas/CAS_Class1-Subtype-III-A	UserReplicon_CAS_Class1-Subtype-III-A_2	1	1	0.444	4	1	Cas__cas10_III-A_1	mandatory	823	5.6e-142	470.9	0.998	0.841	10	701
Bacteria	PMP77368.1	GCA_002878035.1	Aquificota	Cas__csm2gr11_III-A_14	836	defense-finder-models/Cas/Cas/CAS_Class1-Subtype-III-A	UserReplicon_CAS_Class1-Subtype-III-A_2	1	1	0.444	4	1	Cas__csm2gr11_III-A_15	mandatory	147	6.1e-36	119.8	0.957	0.898	13	144
Bacteria	PMP77369.1	GCA_002878035.1	Aquificota	Cas__csm3gr7_III-A_1	837	defense-finder-models/Cas/Cas/CAS_Class1-Subtype-III-A	UserReplicon_CAS_Class1-Subtype-III-A_2	1	1	0.444	4	1	Cas__csm3gr7_III-A_1	mandatory	267	2.5e-68	226.4	0.991	0.884	8	243
Bacteria	PMP77370.1	GCA_002878035.1	Aquificota	Cas__csm4gr5_III-A_1	838	defense-finder-models/Cas/Cas/CAS_Class1-Subtype-III-A	UserReplicon_CAS_Class1-Subtype-III-A_2	1	1	0.444	4	1	Cas__csm4gr5_III-A_3	mandatory	188	7.9e-30	100.5	0.635	0.957	9	188
Bacteria	PMP77687.1	GCA_002878035.1	Aquificota	AbiJ__AbiJ	1054	defense-finder-models/DefenseFinder_1/AbiJ/AbiJ	UserReplicon_AbiJ_1	1	1	1	1	1	AbiJ__AbiJ	mandatory	145	1.9e-05	20.5	0.199	0.414	46	105
Bacteria	QWK12488.1	GCA_018771605.1	Aquificota	RM_Type_IIG__Type_IIG	285	defense-finder-models/RM/RM/RM_Type_IIG	UserReplicon_RM_Type_IIG_3	1	1	1	1	1	RM_Type_IIG__Type_IIG	mandatory	1155	3.4e-125	416.3	0.982	0.979	22	1152
Bacteria	QWK12545.1	GCA_018771605.1	Aquificota	Cas__cas3_I_5	342	defense-finder-models/Cas/Cas/CAS_Class1-Subtype-I-B	UserReplicon_CAS_Class1-Subtype-I-B_1	1	1	0.625	5	1	Cas__cas3_I_5	accessory	755	2.1e-79	264.4	0.854	0.882	85	750
Bacteria	QWK12546.1	GCA_018771605.1	Aquificota	Cas__cas5_I-B_6	343	defense-finder-models/Cas/Cas/CAS_Class1-Subtype-I-B	UserReplicon_CAS_Class1-Subtype-I-B_1	1	1	0.625	5	1	Cas__cas5_I-B_6	mandatory	257	9.9e-30	100.7	0.834	0.665	5	175
Bacteria	QWK12547.1	GCA_018771605.1	Aquificota	Cas__cas7_I_15	344	defense-finder-models/Cas/Cas/CAS_Class1-Subtype-I-B	UserReplicon_CAS_Class1-Subtype-I-B_1	1	1	0.625	5	1	Cas__cas7_I_15	accessory	357	2.9e-39	131.4	0.985	0.874	7	318
Bacteria	QWK12548.1	GCA_018771605.1	Aquificota	Cas__cas11b_I-B_2	345	defense-finder-models/Cas/Cas/CAS_Class1-Subtype-I-B	UserReplicon_CAS_Class1-Subtype-I-B_1	1	1	0.625	5	1	Cas__cas11b_I-B_2	accessory	186	1.7e-10	37.9	0.712	0.677	52	177
Bacteria	QWK12549.1	GCA_018771605.1	Aquificota	Cas__cas6_I_II_III_IV_V_VI_7	346	defense-finder-models/Cas/Cas/CAS_Class1-Subtype-I-B	UserReplicon_CAS_Class1-Subtype-I-B_1	1	1	0.625	5	1	Cas__cas6_I-B_III_1	accessory	230	1.4e-30	103.9	1	0.8	45	228
Bacteria	QWK12764.1	GCA_018771605.1	Aquificota	Cas__cas6_I_II_III_IV_V_VI_20	561	defense-finder-models/Cas/Cas/CAS_Class1-Subtype-I-B	UserReplicon_CAS_Class1-Subtype-I-B_2	1	1	1	8	1	Cas__cas6_I-B_III_1	accessory	257	9.1e-33	110.4	1	0.588	106	256
Bacteria	QWK12765.1	GCA_018771605.1	Aquificota	Cas__cas8b2_I-B_1	562	defense-finder-models/Cas/Cas/CAS_Class1-Subtype-I-B	UserReplicon_CAS_Class1-Subtype-I-B_2	1	1	1	8	1	Cas__cas8b2_I-B_2	mandatory	485	3.6e-93	309.7	0.846	0.682	147	477
Bacteria	QWK12766.1	GCA_018771605.1	Aquificota	Cas__cas11b_I-B_1	563	defense-finder-models/Cas/Cas/CAS_Class1-Subtype-I-B	UserReplicon_CAS_Class1-Subtype-I-B_2	1	1	1	8	1	Cas__cas11b_I-B_2	accessory	178	1.7e-51	171.2	0.965	0.989	1	176
Bacteria	QWK12767.1	GCA_018771605.1	Aquificota	Cas__cas7_I_15	564	defense-finder-models/Cas/Cas/CAS_Class1-Subtype-I-B	UserReplicon_CAS_Class1-Subtype-I-B_2	1	1	1	8	1	Cas__cas7_I_15	accessory	521	8.8e-53	175.7	0.992	0.821	11	438
Bacteria	QWK12768.1	GCA_018771605.1	Aquificota	Cas__cas5_I-B_6	565	defense-finder-models/Cas/Cas/CAS_Class1-Subtype-I-B	UserReplicon_CAS_Class1-Subtype-I-B_2	1	1	1	8	1	Cas__cas5_I-B_6	mandatory	280	1.3e-31	106.9	0.768	0.586	7	170
Bacteria	QWK12769.1	GCA_018771605.1	Aquificota	Cas__cas3_I_5	566	defense-finder-models/Cas/Cas/CAS_Class1-Subtype-I-B	UserReplicon_CAS_Class1-Subtype-I-B_2	1	1	1	8	1	Cas__cas3_I_5	accessory	839	1.5e-91	304.6	0.703	0.604	251	757
Bacteria	QWK12770.1	GCA_018771605.1	Aquificota	Cas__cas4_I_II_III_IV_V_VI_6	567	defense-finder-models/Cas/Cas/CAS_Class1-Subtype-I-B	UserReplicon_CAS_Class1-Subtype-I-B_2	1	1	1	8	1	Cas__cas4_I_II_III_IV_V_VI_6	accessory	168	2e-54	180.8	0.994	0.935	11	167
Bacteria	QWK12771.1	GCA_018771605.1	Aquificota	Cas__cas2_I_II_III_IV_V_VI_5	568	defense-finder-models/Cas/Cas/CAS_Class1-Subtype-I-B	UserReplicon_CAS_Class1-Subtype-I-B_2	1	1	1	8	1	Cas__cas2_I_II_III_IV_V_VI_3	accessory	87	2.3e-28	95.1	0.989	0.989	1	86
Bacteria	QWK13495.1	GCA_018771605.1	Aquificota	RM_Type_II__Type_II_MTases	1292	defense-finder-models/RM/RM/RM_Type_II	UserReplicon_RM_Type_II_1	1	1	1	2	2	RM_Type_II__Type_II_MTases	mandatory	161	1.8e-42	142.6	0.407	0.894	15	158
Bacteria	QWK13496.1	GCA_018771605.1	Aquificota	RM_Type_II__Type_II_REases	1293	defense-finder-models/RM/RM/RM_Type_II	UserReplicon_RM_Type_II_1	1	1	1	2	2	RM_Type_II__Type_II_REases	mandatory	309	2.6e-70	233.6	1.061	0.939	14	303
Bacteria	QWK13497.1	GCA_018771605.1	Aquificota	RM_Type_II__Type_II_MTases	1294	defense-finder-models/RM/RM/RM_Type_II	UserReplicon_RM_Type_II_1	1	1	1	2	2	RM_Type_II__Type_II_MTases	mandatory	321	1.2e-91	303.5	0.73	0.938	20	320
Bacteria	QWK13501.1	GCA_018771605.1	Aquificota	Cas__cmr5gr11_III-B_18	1298	defense-finder-models/Cas/Cas/CAS_Class1-Subtype-III-B	UserReplicon_CAS_Class1-Subtype-III-B_3	1	1	1	7	1	Cas__cmr5gr11_III-B_18	mandatory	121	2.4e-30	102	0.983	0.901	4	112
Bacteria	QWK13502.1	GCA_018771605.1	Aquificota	Cas__cmr6gr7_III-B_2	1299	defense-finder-models/Cas/Cas/CAS_Class1-Subtype-III-B	UserReplicon_CAS_Class1-Subtype-III-B_3	1	1	1	7	1	Cas__cmr6gr7_III-B_1	mandatory	304	1.4e-62	207.9	0.968	0.826	53	303
Bacteria	QWK13503.1	GCA_018771605.1	Aquificota	Cas__csx1_III_2	1300	defense-finder-models/Cas/Cas/CAS_Class1-Subtype-III-B	UserReplicon_CAS_Class1-Subtype-III-B_3	1	1	1	7	1	Cas__csx1_III_10	accessory	438	1.9e-69	231.5	0.995	0.952	11	427
Bacteria	QWK13504.1	GCA_018771605.1	Aquificota	Cas__cas10_III_6	1301	defense-finder-models/Cas/Cas/CAS_Class1-Subtype-III-B	UserReplicon_CAS_Class1-Subtype-III-B_3	1	1	1	7	1	Cas__cas10_III_1	accessory	888	2.3e-129	429.4	0.837	0.818	137	862
Bacteria	QWK13505.1	GCA_018771605.1	Aquificota	Cas__cmr1gr7_III-B_1	1302	defense-finder-models/Cas/Cas/CAS_Class1-Subtype-III-B	UserReplicon_CAS_Class1-Subtype-III-B_3	1	1	1	7	1	Cas__cmr1gr7_III-B_1	mandatory	408	4.8e-26	88.4	0.845	0.89	4	366
Bacteria	QWK13506.1	GCA_018771605.1	Aquificota	Cas__cmr3gr5_III-B_III-C_8	1303	defense-finder-models/Cas/Cas/CAS_Class1-Subtype-III-B	UserReplicon_CAS_Class1-Subtype-III-B_3	1	1	1	7	1	Cas__cmr3gr5_III-B_III-C_5	accessory	347	5.2e-49	164.3	0.899	0.896	4	314
Bacteria	QWK13507.1	GCA_018771605.1	Aquificota	Cas__cmr4gr7_III-B_III-C_2	1304	defense-finder-models/Cas/Cas/CAS_Class1-Subtype-III-B	UserReplicon_CAS_Class1-Subtype-III-B_3	1	1	1	7	1	Cas__cmr4gr7_III-B_III-C_2	accessory	326	1.1e-79	264.8	0.98	0.929	6	308
Bacteria	QWK13887.1	GCA_018771605.1	Aquificota	RM_Type_II__Type_II_MTases	1684	defense-finder-models/RM/RM/RM_Type_II	UserReplicon_RM_Type_II_2	1	1	1	2	1	RM_Type_II__Type_II_MTases	mandatory	414	1.5e-91	304	0.757	0.635	8	270
Bacteria	QWK13888.1	GCA_018771605.1	Aquificota	RM_Type_II__Type_II_REases	1685	defense-finder-models/RM/RM/RM_Type_II	UserReplicon_RM_Type_II_2	1	1	1	2	1	RM_Type_II__Type_II_REases	mandatory	224	7.3e-10	35.9	0.832	0.915	18	222
Bacteria	RTZ58182.1	GCA_003972855.1	Aquificota	Cas__cmr4gr7_III-B_III-C_2	109	defense-finder-models/Cas/Cas/CAS_Class1-Subtype-III-B	UserReplicon_CAS_Class1-Subtype-III-B_3	1	1	0.429	3	1	Cas__cmr4gr7_III-B_III-C_2	accessory	310	1.6e-69	231	0.984	0.968	8	307
Bacteria	RTZ58183.1	GCA_003972855.1	Aquificota	Cas__cmr5gr11_III-B_18	110	defense-finder-models/Cas/Cas/CAS_Class1-Subtype-III-B	UserReplicon_CAS_Class1-Subtype-III-B_3	1	1	0.429	3	1	Cas__cmr5gr11_III-B_18	mandatory	128	7.5e-26	87.1	0.992	0.898	4	118
Bacteria	RTZ58184.1	GCA_003972855.1	Aquificota	Cas__cmr6gr7_III-B_2	111	defense-finder-models/Cas/Cas/CAS_Class1-Subtype-III-B	UserReplicon_CAS_Class1-Subtype-III-B_3	1	1	0.429	3	1	Cas__cmr6gr7_III-B_1	mandatory	334	1.6e-40	135.3	0.917	0.796	64	329
Bacteria	RTZ58857.1	GCA_003972855.1	Aquificota	Cas__cas8b1_I-B_14	362	defense-finder-models/Cas/Cas/CAS_Class1-Subtype-I-B	UserReplicon_CAS_Class1-Subtype-I-B_1	1	1	0.375	3	1	Cas__cas8b2_I-B_2	mandatory	581	3.5e-85	283.1	0.998	0.948	15	565
Bacteria	RTZ58858.1	GCA_003972855.1	Aquificota	Cas__cas5_I-B_8	363	defense-finder-models/Cas/Cas/CAS_Class1-Subtype-I-B	UserReplicon_CAS_Class1-Subtype-I-B_1	1	1	0.375	3	1	Cas__cas5_I-B_6	mandatory	238	3.8e-39	130.5	0.937	0.765	4	185
Bacteria	RTZ58860.1	GCA_003972855.1	Aquificota	Cas__cas7_I-B_8	365	defense-finder-models/Cas/Cas/CAS_Class1-Subtype-I-B	UserReplicon_CAS_Class1-Subtype-I-B_1	1	1	0.375	3	1	Cas__cas7_I-B_6	mandatory	296	2.8e-86	285.6	0.997	0.919	4	275
Bacteria	RTZ58900.1	GCA_003972855.1	Aquificota	Cas__cas4_I_II_III_IV_V_VI_6	378	defense-finder-models/Cas/Cas/CAS_Cluster	UserReplicon_CAS_Cluster_9	1	1	0.06	3	1	Cas__cas4_I_II_III_IV_V_VI_1	mandatory	165	1.4e-49	164.6	0.994	0.958	7	164
Bacteria	RTZ58901.1	GCA_003972855.1	Aquificota	Cas__cas1_I_II_III_IV_V_VI_7	379	defense-finder-models/Cas/Cas/CAS_Cluster	UserReplicon_CAS_Cluster_9	1	1	0.06	3	1	Cas__cas1_I_II_III_IV_V_VI_1	mandatory	332	6.9e-127	419.3	0.994	0.982	5	330
Bacteria	RTZ58903.1	GCA_003972855.1	Aquificota	Cas__cas2_I_II_III_IV_V_VI_3	381	defense-finder-models/Cas/Cas/CAS_Cluster	UserReplicon_CAS_Cluster_9	1	1	0.06	3	1	Cas__cas2_I_II_III_IV_V_VI_1	mandatory	87	8.6e-29	95.9	0.987	0.874	3	78
Bacteria	RTZ58993.1	GCA_003972855.1	Aquificota	Cas__csm2gr11_III-A_14	407	defense-finder-models/Cas/Cas/CAS_Class1-Subtype-III-A	UserReplicon_CAS_Class1-Subtype-III-A_2	1	1	0.333	3	1	Cas__csm2gr11_III-A_15	mandatory	162	6.7e-25	83.9	0.821	0.759	36	158
Bacteria	RTZ58994.1	GCA_003972855.1	Aquificota	Cas__csm3gr7_III-A_1	408	defense-finder-models/Cas/Cas/CAS_Class1-Subtype-III-A	UserReplicon_CAS_Class1-Subtype-III-A_2	1	1	0.333	3	1	Cas__csm3gr7_III-A_1	mandatory	301	2e-60	200.5	0.981	0.841	10	262
Bacteria	RTZ58997.1	GCA_003972855.1	Aquificota	Cas__csm4gr5_III-A_2	411	defense-finder-models/Cas/Cas/CAS_Class1-Subtype-III-A	UserReplicon_CAS_Class1-Subtype-III-A_2	1	1	0.333	3	1	Cas__csm4gr5_III-A_2	mandatory	344	3e-29	98.5	0.915	0.936	1	322
Bacteria	RTZ61111.1	GCA_003972855.1	Aquificota	pAgo__COG1431_pAgo	1163	defense-finder-models/DefenseFinder_5/pAgo/pAgo	UserReplicon_pAgo_1	1	1	1	1	1	pAgo__pAgo_LongA	mandatory	715	1.7e-95	317.4	1	1	1	715
Bacteria	RUM56860.1	GCA_003978565.1	Aquificota	RM_Type_IIG__Type_IIG	27	defense-finder-models/RM/RM/RM_Type_IIG	UserReplicon_RM_Type_IIG_1	1	1	1	1	1	RM_Type_IIG__Type_IIG	mandatory	1070	3.1e-187	621.2	1.219	0.987	12	1067
Bacteria	RUM58549.1	GCA_003978565.1	Aquificota	Cas__cas10_III-A_1	898	defense-finder-models/Cas/Cas/CAS_Class1-Subtype-III-A	UserReplicon_CAS_Class1-Subtype-III-A_1	1	1	0.222	2	1	Cas__cas10_III-A_1	mandatory	719	3.4e-145	481.3	1	0.978	7	709
Bacteria	RUM58550.1	GCA_003978565.1	Aquificota	Cas__cas6_I_II_III_IV_V_VI_14	899	defense-finder-models/Cas/Cas/CAS_Class1-Subtype-III-A	UserReplicon_CAS_Class1-Subtype-III-A_1	1	1	0.222	2	1	Cas__cas6_I_II_III_IV_V_VI_15	accessory	242	2.4e-52	174.4	0.983	0.996	1	241
Bacteria	RUM59581.1	GCA_003978485.1	Aquificota	Cas__cmr3gr5_III-C_1	38	defense-finder-models/Cas/Cas/CAS_Class1-Subtype-III-C	UserReplicon_CAS_Class1-Subtype-III-C_3	1	1	0.5	3	1	Cas__cmr3gr5_III-C_1	mandatory	288	2e-60	200.6	0.993	0.993	1	286
Bacteria	RUM59582.1	GCA_003978485.1	Aquificota	Cas__cmr5gr11_III-C_14	39	defense-finder-models/Cas/Cas/CAS_Class1-Subtype-III-C	UserReplicon_CAS_Class1-Subtype-III-C_3	1	1	0.5	3	1	Cas__cmr5gr11_III-C_11	accessory	189	4.7e-47	156.2	0.983	0.942	12	189
Bacteria	RUM59583.1	GCA_003978485.1	Aquificota	Cas__cmr4gr7_III-B_III-C_2	40	defense-finder-models/Cas/Cas/CAS_Class1-Subtype-III-C	UserReplicon_CAS_Class1-Subtype-III-C_3	1	1	0.5	3	1	Cas__cmr4gr7_III-B_III-C_2	accessory	344	8.8e-27	90.4	0.719	0.64	119	338
Bacteria	RUM60817.1	GCA_003978485.1	Aquificota	Cas__cas10_III_1	475	defense-finder-models/Cas/Cas/CAS_Class1-Subtype-III-B	UserReplicon_CAS_Class1-Subtype-III-B_2	1	1	0.286	2	1	Cas__cas10_III_1	accessory	451	3.4e-28	94.8	0.669	0.978	10	450
Bacteria	RUM60818.1	GCA_003978485.1	Aquificota	Cas__cmr1gr7_III-B_1	476	defense-finder-models/Cas/Cas/CAS_Class1-Subtype-III-B	UserReplicon_CAS_Class1-Subtype-III-B_2	1	1	0.286	2	1	Cas__cmr1gr7_III-B_1	mandatory	424	3.6e-34	114.5	0.517	0.46	2	196
Bacteria	RUM61025.1	GCA_003978485.1	Aquificota	RM_Type_IIG__Type_IIG	603	defense-finder-models/RM/RM/RM_Type_IIG	UserReplicon_RM_Type_IIG_1	1	1	1	1	1	RM_Type_IIG__Type_IIG	mandatory	903	4.4e-148	491.4	0.735	0.982	11	897
Bacteria	RUM61225.1	GCA_003978485.1	Aquificota	Retron_I_A__HNH_TIGR02646	680	defense-finder-models/DefenseFinder_2/Septu/Septu	UserReplicon_Septu_1	1	1	1	2	1	Septu__PtuB	mandatory	192	2.9e-45	150.9	0.744	0.854	1	164
Bacteria	RUM61226.1	GCA_003978485.1	Aquificota	Septu__PtuA	681	defense-finder-models/DefenseFinder_2/Septu/Septu	UserReplicon_Septu_1	1	1	1	2	1	Septu__PtuA	mandatory	363	3.5e-41	138.5	0.602	0.741	92	360
Bacteria	RUM62055.1	GCA_003978485.1	Aquificota	Cas__csx1_III_2	1059	defense-finder-models/Cas/Cas/CAS_Class1-Subtype-III-A	UserReplicon_CAS_Class1-Subtype-III-A_1	1	1	0.222	2	1	Cas__csx1_III_10	accessory	431	6.3e-72	239.1	0.98	0.963	1	415
Bacteria	RUM62056.1	GCA_003978485.1	Aquificota	Cas__csm5gr7_III-A_2	1060	defense-finder-models/Cas/Cas/CAS_Class1-Subtype-III-A	UserReplicon_CAS_Class1-Subtype-III-A_1	1	1	0.222	2	1	Cas__csm5gr7_III-A_2	mandatory	382	1.1e-30	103.2	0.997	0.88	20	355
Bacteria	WP_012675506.1	GCF_000021565.1	Aquificota	ShosTA__ShosT	348	defense-finder-models/DefenseFinder_2/ShosTA/ShosTA	UserReplicon_ShosTA_1	1	1	1	2	1	ShosTA__ShosT	mandatory	459	8.5e-07	25.8	0.219	0.102	340	386
Bacteria	WP_012675508.1	GCF_000021565.1	Aquificota	ShosTA__ShosA	350	defense-finder-models/DefenseFinder_2/ShosTA/ShosTA	UserReplicon_ShosTA_1	1	1	1	2	1	ShosTA__ShosA	mandatory	352	4.1e-70	233.2	0.908	0.781	9	283
Bacteria	WP_012675939.1	GCF_000021565.1	Aquificota	RM_Type_IV__Type_IV_REases	741	defense-finder-models/RM/RM/RM_Type_IV	UserReplicon_RM_Type_IV_1	1	1	1	1	1	RM_Type_IV__Type_IV_REases	mandatory	781	1.8e-140	466.5	1.23	0.971	24	781
Bacteria	WP_012962938.1	GCF_000010785.1	Aquificota	RM_Type_IIG__Type_IIG	269	defense-finder-models/RM/RM/RM_Type_IIG	UserReplicon_RM_Type_IIG_1	1	1	1	1	1	RM_Type_IIG__Type_IIG	mandatory	1408	9.2e-110	365.3	0.603	0.427	805	1405
Bacteria	WP_012963878.1	GCF_000010785.1	Aquificota	Cas__cas2_I_II_III_IV_V_VI_5	1117	defense-finder-models/Cas/Cas/CAS_Class1-Subtype-I-B	UserReplicon_CAS_Class1-Subtype-I-B_1	1	1	1	8	1	Cas__cas2_I_II_III_IV_V_VI_3	accessory	88	4.3e-30	100.7	0.989	0.977	1	86
Bacteria	WP_012963879.1	GCF_000010785.1	Aquificota	Cas__cas1_I_II_III_IV_V_VI_7	1118	defense-finder-models/Cas/Cas/CAS_Class1-Subtype-I-B	UserReplicon_CAS_Class1-Subtype-I-B_1	1	1	1	8	1	Cas__cas1_I_II_III_IV_V_VI_7	accessory	329	1.8e-138	457.9	0.994	0.976	5	325
Bacteria	WP_012963880.1	GCF_000010785.1	Aquificota	Cas__cas4_I_II_III_IV_V_VI_6	1119	defense-finder-models/Cas/Cas/CAS_Class1-Subtype-I-B	UserReplicon_CAS_Class1-Subtype-I-B_1	1	1	1	8	1	Cas__cas4_I_II_III_IV_V_VI_6	accessory	168	2.6e-51	170.7	0.994	0.94	11	168
Bacteria	WP_012963881.1	GCF_000010785.1	Aquificota	Cas__cas3_I_5	1120	defense-finder-models/Cas/Cas/CAS_Class1-Subtype-I-B	UserReplicon_CAS_Class1-Subtype-I-B_1	1	1	1	8	1	Cas__cas3_I_5	accessory	768	1.8e-54	182.1	0.806	0.772	55	647
Bacteria	WP_012963882.1	GCF_000010785.1	Aquificota	Cas__cas5_I-B_17	1121	defense-finder-models/Cas/Cas/CAS_Class1-Subtype-I-B	UserReplicon_CAS_Class1-Subtype-I-B_1	1	1	1	8	1	Cas__cas5_I-B_6	mandatory	253	1.9e-44	148.9	0.868	0.858	1	217
Bacteria	WP_012963883.1	GCF_000010785.1	Aquificota	Cas__cas7_I-B_8	1122	defense-finder-models/Cas/Cas/CAS_Class1-Subtype-I-B	UserReplicon_CAS_Class1-Subtype-I-B_1	1	1	1	8	1	Cas__cas7_I-B_6	mandatory	300	1.1e-89	297.3	0.993	0.917	4	278
Bacteria	WP_012963884.1	GCF_000010785.1	Aquificota	Cas__cas8b1_I-B_14	1123	defense-finder-models/Cas/Cas/CAS_Class1-Subtype-I-B	UserReplicon_CAS_Class1-Subtype-I-B_1	1	1	1	8	1	Cas__cas8b2_I-B_2	mandatory	580	9.4e-126	417.6	0.998	0.966	1	560
Bacteria	WP_012963885.1	GCF_000010785.1	Aquificota	Cas__cas6_I_II_III_IV_V_VI_14	1124	defense-finder-models/Cas/Cas/CAS_Class1-Subtype-I-B	UserReplicon_CAS_Class1-Subtype-I-B_1	1	1	1	8	1	Cas__cas6_I-B_III_1	accessory	245	4e-41	138.3	0.988	0.98	1	240
Bacteria	WP_013637719.1	GCF_000191045.1	Aquificota	RM_Type_II__Type_II_REases	88	defense-finder-models/RM/RM/RM_Type_II	UserReplicon_RM_Type_II_1	1	1	1	2	1	RM_Type_II__Type_II_REases	mandatory	300	5.6e-85	281.5	1.053	0.947	10	293
Bacteria	WP_013637720.1	GCF_000191045.1	Aquificota	RM_Type_II__Type_II_MTases	89	defense-finder-models/RM/RM/RM_Type_II	UserReplicon_RM_Type_II_1	1	1	1	2	1	RM_Type_II__Type_II_MTases	mandatory	291	1.2e-97	323.1	0.686	0.89	7	265
Bacteria	WP_013638148.1	GCF_000191045.1	Aquificota	Lamassu-Fam__LmuB_SMC_Hydrolase_protease	486	defense-finder-models/DefenseFinder_1/Lamassu-Fam/Lamassu-Fam	UserReplicon_Lamassu-Fam_1	1	1	0.667	2	1	Lamassu-Fam__LmuB_SMC_Cap4_nuclease_II	mandatory	244	9.1e-08	27	0.343	0.389	27	121
Bacteria	WP_013638153.1	GCF_000191045.1	Aquificota	Lamassu-Fam__LmuA_effector_Protease	491	defense-finder-models/DefenseFinder_1/Lamassu-Fam/Lamassu-Fam	UserReplicon_Lamassu-Fam_1	1	1	0.667	2	1	Lamassu-Fam__LmuA_effector_Cap4_nuclease_II	mandatory	482	2.9e-10	36.3	0.224	0.183	102	189
Bacteria	WP_015418752.1	GCF_000213785.1	Aquificota	RM__Type_I_MTases	137	defense-finder-models/RM/RM/RM_Type_I	UserReplicon_RM_Type_I_1	1	1	1	2.5	1	RM__Type_I_MTases	mandatory	812	1.5e-183	607.9	0.99	0.809	4	660
Bacteria	WP_015418753.1	GCF_000213785.1	Aquificota	SoFic__SoFic	138	defense-finder-models/DefenseFinder_5/SoFIC/SoFic	UserReplicon_SoFic_1	1	1	1	1	1	SoFic__SoFic	mandatory	370	2.4e-106	352.5	0.978	0.986	4	368
Bacteria	WP_015418754.1	GCF_000213785.1	Aquificota	RM__Type_I_S	139	defense-finder-models/RM/RM/RM_Type_I	UserReplicon_RM_Type_I_1	1	1	1	2.5	1	RM__Type_I_S	accessory	439	2.2e-82	273.5	0.469	0.772	98	436
Bacteria	WP_015418756.1	GCF_000213785.1	Aquificota	RM__Type_I_REases	141	defense-finder-models/RM/RM/RM_Type_I	UserReplicon_RM_Type_I_1	1	1	1	2.5	1	RM__Type_I_REases	mandatory	1055	5.4e-162	537.9	0.983	0.964	6	1022
Bacteria	WP_015419026.1	GCF_000213785.1	Aquificota	Cas__cas4_I_II_III_IV_V_VI_6	384	defense-finder-models/Cas/Cas/CAS_Class1-Subtype-III-D	UserReplicon_CAS_Class1-Subtype-III-D_3	1	1	0.375	3	1	Cas__cas4_I_II_III_IV_V_VI_4	accessory	165	5.1e-42	140.3	0.994	0.958	7	164
Bacteria	WP_015419027.1	GCF_000213785.1	Aquificota	Cas__cas1_I_II_III_IV_V_VI_7	385	defense-finder-models/Cas/Cas/CAS_Class1-Subtype-III-D	UserReplicon_CAS_Class1-Subtype-III-D_3	1	1	0.375	3	1	Cas__cas1_I_II_III_IV_V_VI_10	accessory	300	5e-122	403.6	0.903	0.973	4	295
Bacteria	WP_015419028.1	GCF_000213785.1	Aquificota	Cas__csm3gr7_III-D_2	386	defense-finder-models/Cas/Cas/CAS_Class1-Subtype-III-D	UserReplicon_CAS_Class1-Subtype-III-D_3	1	1	0.375	3	1	Cas__csm3gr7_III-D_1	mandatory	439	5.4e-111	369	0.638	0.95	17	433
Bacteria	WP_015419029.1	GCF_000213785.1	Aquificota	Cas__DEDDh_I_II_III_IV_V_VI_1	387	defense-finder-models/Cas/Cas/CAS_Class1-Subtype-III-D	UserReplicon_CAS_Class1-Subtype-III-D_3	1	1	0.375	3	1	Cas__DEDDh_I_II_III_IV_V_VI_1	neutral	196	6.2e-48	159.5	0.994	0.796	13	168
Bacteria	WP_015419278.1	GCF_000213785.1	Aquificota	Cas__cas6_I_II_III_IV_V_VI_7	613	defense-finder-models/Cas/Cas/CAS_Class1-Subtype-I-B	UserReplicon_CAS_Class1-Subtype-I-B_1	1	1	0.5	4	1	Cas__cas6_I-B_III_1	accessory	265	1.4e-34	116.8	1	0.823	45	262
Bacteria	WP_015419280.1	GCF_000213785.1	Aquificota	Cas__cas7_I-B_6	615	defense-finder-models/Cas/Cas/CAS_Class1-Subtype-I-B	UserReplicon_CAS_Class1-Subtype-I-B_1	1	1	0.5	4	1	Cas__cas7_I-B_6	mandatory	328	1.2e-28	96.8	0.875	0.936	8	314
Bacteria	WP_015419281.1	GCF_000213785.1	Aquificota	Cas__cas5_I-B_6	616	defense-finder-models/Cas/Cas/CAS_Class1-Subtype-I-B	UserReplicon_CAS_Class1-Subtype-I-B_1	1	1	0.5	4	1	Cas__cas5_I-B_6	mandatory	223	2.3e-22	76.6	0.856	0.704	2	158
Bacteria	WP_015419282.1	GCF_000213785.1	Aquificota	Cas__cas3_I_5	617	defense-finder-models/Cas/Cas/CAS_Class1-Subtype-I-B	UserReplicon_CAS_Class1-Subtype-I-B_1	1	1	0.5	4	1	Cas__cas3_I_5	accessory	763	3.7e-79	263.4	0.61	0.575	255	693
Bacteria	WP_015419757.1	GCF_000213785.1	Aquificota	Cas__cas7_I-B_1	1058	defense-finder-models/Cas/Cas/CAS_Class1-Subtype-I-B	UserReplicon_CAS_Class1-Subtype-I-B_2	1	1	0.75	6	1	Cas__cas7_I-B_6	mandatory	328	8.9e-68	224.5	0.983	0.723	14	250
Bacteria	WP_015419758.1	GCF_000213785.1	Aquificota	Cas__cas8b2_I-B_2	1059	defense-finder-models/Cas/Cas/CAS_Class1-Subtype-I-B	UserReplicon_CAS_Class1-Subtype-I-B_2	1	1	0.75	6	1	Cas__cas8b2_I-B_2	mandatory	740	7.6e-48	160	0.997	0.428	405	721
Bacteria	WP_015419759.1	GCF_000213785.1	Aquificota	Cas__cas3_I_2	1060	defense-finder-models/Cas/Cas/CAS_Class1-Subtype-I-B	UserReplicon_CAS_Class1-Subtype-I-B_2	1	1	0.75	6	1	Cas__cas3_I_5	accessory	735	5.3e-81	269	0.994	0.456	245	579
Bacteria	WP_015419760.1	GCF_000213785.1	Aquificota	Cas__cas4_I_II_III_IV_V_VI_6	1061	defense-finder-models/Cas/Cas/CAS_Class1-Subtype-I-B	UserReplicon_CAS_Class1-Subtype-I-B_2	1	1	0.75	6	1	Cas__cas4_I_II_III_IV_V_VI_6	accessory	170	1.6e-52	174.4	0.988	0.935	11	169
Bacteria	WP_015419761.1	GCF_000213785.1	Aquificota	Cas__cas1_I_II_III_IV_V_VI_7	1062	defense-finder-models/Cas/Cas/CAS_Class1-Subtype-I-B	UserReplicon_CAS_Class1-Subtype-I-B_2	1	1	0.75	6	1	Cas__cas1_I_II_III_IV_V_VI_7	accessory	317	1.3e-120	399	0.994	0.965	5	310
Bacteria	WP_015419762.1	GCF_000213785.1	Aquificota	Cas__cas2_I_II_III_IV_V_VI_3	1063	defense-finder-models/Cas/Cas/CAS_Class1-Subtype-I-B	UserReplicon_CAS_Class1-Subtype-I-B_2	1	1	0.75	6	1	Cas__cas2_I_II_III_IV_V_VI_3	accessory	93	5.3e-24	80.8	0.949	0.86	3	82
Bacteria	WP_015419980.1	GCF_000213785.1	Aquificota	RM_Type_IIG__Type_IIG	1271	defense-finder-models/RM/RM/RM_Type_IIG	UserReplicon_RM_Type_IIG_2	1	1	1	1	1	RM_Type_IIG__Type_IIG	mandatory	1183	1e-136	454.2	0.934	0.954	56	1183
Bacteria	NIO74923.1	GCA_011773575.1	Armatimonadota	RM_Type_IV__Type_IV_REases	628	defense-finder-models/RM/RM/RM_Type_IV	UserReplicon_RM_Type_IV_1	1	1	1	1	1	RM_Type_IV__Type_IV_REases	mandatory	156	5.3e-31	105.1	0.363	0.968	2	152
Bacteria	NIO75471.1	GCA_011773575.1	Armatimonadota	AbiL__AbiLi2	1176	defense-finder-models/DefenseFinder_1/AbiL/AbiL	UserReplicon_AbiL_1	1	1	1	2	1	AbiL__AbiLi	mandatory	427	1.3e-33	114.2	0.323	0.358	272	424
Bacteria	NIO75472.1	GCA_011773575.1	Armatimonadota	AbiL__AbiLii2	1177	defense-finder-models/DefenseFinder_1/AbiL/AbiL	UserReplicon_AbiL_1	1	1	1	2	1	AbiL__AbiLii	mandatory	220	2.8e-08	30.8	0.205	0.264	84	141
Bacteria	NIO76242.1	GCA_011773575.1	Armatimonadota	AbiU__AbiU	1947	defense-finder-models/DefenseFinder_1/AbiU/AbiU	UserReplicon_AbiU_2	1	1	1	1	1	AbiU__AbiU	mandatory	568	7.9e-51	170.6	0.828	0.82	10	475
Bacteria	OIO91291.1	GCA_001872605.1	Armatimonadota	RM_Type_IIG__Type_IIG	1072	defense-finder-models/RM/RM/RM_Type_IIG	UserReplicon_RM_Type_IIG_6	1	1	1	1	1	RM_Type_IIG__Type_IIG	mandatory	949	8.2e-102	340.2	0.782	0.965	34	949
Bacteria	OIO91944.1	GCA_001872605.1	Armatimonadota	RM_Type_IIG__Type_IIG	1360	defense-finder-models/RM/RM/RM_Type_IIG	UserReplicon_RM_Type_IIG_7	1	1	1	1	1	RM_Type_IIG__Type_IIG	mandatory	1038	6.6e-163	542.3	0.98	0.988	9	1034
Bacteria	OIO92128.1	GCA_001872605.1	Armatimonadota	RM_Type_II__Type_II_REases	1454	defense-finder-models/RM/RM/RM_Type_II	UserReplicon_RM_Type_II_2	1	1	1	2	1	RM_Type_II__Type_II_REases	mandatory	203	5.1e-14	50.9	0.84	0.931	3	191
Bacteria	OIO92129.1	GCA_001872605.1	Armatimonadota	RM_Type_II__Type_II_MTases	1455	defense-finder-models/RM/RM/RM_Type_II	UserReplicon_RM_Type_II_2	1	1	1	2	1	RM_Type_II__Type_II_MTases	mandatory	320	1.3e-77	259	0.675	0.797	19	273
Bacteria	OIO93057.1	GCA_001872605.1	Armatimonadota	RM_Type_II__Type_II_REases	1799	defense-finder-models/RM/RM/RM_Type_II	UserReplicon_RM_Type_II_3	1	1	1	2	1	RM_Type_II__Type_II_REases	mandatory	202	2.4e-33	113.3	0.756	0.975	1	197
Bacteria	OIO93059.1	GCA_001872605.1	Armatimonadota	RM_Type_IV__Type_IV_REases	1801	defense-finder-models/RM/RM/RM_Type_IV	UserReplicon_RM_Type_IV_12	1	1	1	1	1	RM_Type_IV__Type_IV_REases	mandatory	517	5.2e-106	353.8	0.857	0.981	11	517
Bacteria	OIO93061.1	GCA_001872605.1	Armatimonadota	RM_Type_II__Type_II_MTases	1803	defense-finder-models/RM/RM/RM_Type_II	UserReplicon_RM_Type_II_3	1	1	1	2	1	RM_Type_II__Type_II_MTases	mandatory	392	3.4e-68	228.5	0.869	0.895	31	381
Bacteria	OIO94334.1	GCA_001872605.1	Armatimonadota	RM_Type_III__Type_III_REases	2315	defense-finder-models/RM/RM/RM_Type_III	UserReplicon_RM_Type_III_10	1	1	1	2	1	RM_Type_III__Type_III_REases	mandatory	1000	7.8e-235	780.1	0.973	0.988	1	988
Bacteria	OIO94337.1	GCA_001872605.1	Armatimonadota	RM_Type_III__Type_III_MTases	2318	defense-finder-models/RM/RM/RM_Type_III	UserReplicon_RM_Type_III_10	1	1	1	2	1	RM_Type_III__Type_III_MTases	mandatory	680	2.4e-159	530.1	0.948	0.965	12	667
Bacteria	OIO94506.1	GCA_001872605.1	Armatimonadota	RM_Type_II__Type_II_REases	2390	defense-finder-models/RM/RM/RM_Type_II	UserReplicon_RM_Type_II_4	1	1	1	2	1	RM_Type_II__Type_II_REases	mandatory	376	8.7e-20	70.1	0.905	0.819	59	366
Bacteria	OIO94507.1	GCA_001872605.1	Armatimonadota	RM_Type_II__Type_II_MTases	2391	defense-finder-models/RM/RM/RM_Type_II	UserReplicon_RM_Type_II_4	1	1	1	2	1	RM_Type_II__Type_II_MTases	mandatory	296	2.6e-86	287.5	0.702	0.889	3	265
Bacteria	OIO95513.1	GCA_001872605.1	Armatimonadota	RM_Type_II__Type_II_MTases	2791	defense-finder-models/RM/RM/RM_Type_II	UserReplicon_RM_Type_II_5	1	1	1	2	2	RM_Type_II__Type_II_MTases	mandatory	300	1.3e-31	108.1	0.243	0.297	37	125
Bacteria	OIO95529.1	GCA_001872605.1	Armatimonadota	RM_Type_II__Type_II_MTases	2794	defense-finder-models/RM/RM/RM_Type_II	UserReplicon_RM_Type_II_5	1	1	1	2	2	RM_Type_II__Type_II_MTases	mandatory	477	1.5e-142	473.5	1.202	0.941	29	477
Bacteria	OIO95530.1	GCA_001872605.1	Armatimonadota	RM_Type_II__Type_II_REases	2795	defense-finder-models/RM/RM/RM_Type_II	UserReplicon_RM_Type_II_5	1	1	1	2	2	RM_Type_II__Type_II_REases	mandatory	321	1.8e-17	62.1	0.691	0.701	71	295
Bacteria	OIO97703.1	GCA_001872605.1	Armatimonadota	RM_Type_III__Type_III_REases	3679	defense-finder-models/RM/RM/RM_Type_III	UserReplicon_RM_Type_III_11	1	1	1	2	1	RM_Type_III__Type_III_REases	mandatory	1025	3e-09	33.5	0.17	0.149	153	305
Bacteria	OIO97706.1	GCA_001872605.1	Armatimonadota	RM_Type_III__Type_III_MTases	3682	defense-finder-models/RM/RM/RM_Type_III	UserReplicon_RM_Type_III_11	1	1	1	2	1	RM_Type_III__Type_III_MTases	mandatory	1000	1.7e-81	273	0.687	0.54	36	575
Bacteria	OIO97901.1	GCA_001872605.1	Armatimonadota	PfiAT__PfiT	3748	defense-finder-models/DefenseFinder_5/PfiAT/PfiAT	UserReplicon_PfiAT_1	1	1	1	2	1	PfiAT__PfiT	mandatory	110	6.6e-05	20.8	0.904	0.909	6	105
Bacteria	OIO97902.1	GCA_001872605.1	Armatimonadota	PfiAT__PfiA	3749	defense-finder-models/DefenseFinder_5/PfiAT/PfiAT	UserReplicon_PfiAT_1	1	1	1	2	1	PfiAT__PfiA	mandatory	99	2.9e-08	31.6	0.927	0.818	9	89
Bacteria	OIO98247.1	GCA_001872605.1	Armatimonadota	RM_Type_IIG__Type_IIG	3937	defense-finder-models/RM/RM/RM_Type_IIG	UserReplicon_RM_Type_IIG_8	1	1	1	1	1	RM_Type_IIG__Type_IIG	mandatory	1004	7.3e-158	526.2	0.664	0.994	2	999
Bacteria	OIO98745.1	GCA_001872605.1	Armatimonadota	RM_Type_IIG__Type_IIG	4126	defense-finder-models/RM/RM/RM_Type_IIG	UserReplicon_RM_Type_IIG_9	1	1	1	1	1	RM_Type_IIG__Type_IIG	mandatory	1687	4.4e-99	331.1	0.829	0.655	185	1289
Bacteria	OIO98960.1	GCA_001872605.1	Armatimonadota	RM__Type_I_MTases	4198	defense-finder-models/RM/RM/RM_Type_I	UserReplicon_RM_Type_I_1	1	1	0.667	2	1	RM__Type_I_MTases	mandatory	502	2.1e-160	532.4	0.955	1	1	502
Bacteria	OIO98963.1	GCA_001872605.1	Armatimonadota	RM__Type_I_REases	4201	defense-finder-models/RM/RM/RM_Type_I	UserReplicon_RM_Type_I_1	1	1	0.667	2	1	RM__Type_I_REases	mandatory	797	9.3e-129	429.1	0.57	0.695	2	555
Bacteria	OIO99048.1	GCA_001872605.1	Armatimonadota	SoFic__SoFic	4236	defense-finder-models/DefenseFinder_5/SoFIC/SoFic	UserReplicon_SoFic_2	1	1	1	1	1	SoFic__SoFic	mandatory	388	2.9e-119	396.4	0.983	0.938	18	381
Bacteria	QOJ10873.1	GCA_015709495.1	Armatimonadota	PsyrTA__PsyrT	371	defense-finder-models/DefenseFinder_2/PsyrTA/PsyrTA	UserReplicon_PsyrTA_1	1	1	1	2	1	PsyrTA__PsyrT	mandatory	697	2.1e-209	694.3	0.987	0.968	17	691
Bacteria	QOJ10874.1	GCA_015709495.1	Armatimonadota	PsyrTA__PsyrA	372	defense-finder-models/DefenseFinder_2/PsyrTA/PsyrTA	UserReplicon_PsyrTA_1	1	1	1	2	1	PsyrTA__PsyrA	mandatory	300	3.7e-69	230.8	0.686	0.89	17	283
Bacteria	QOJ10951.1	GCA_015709495.1	Armatimonadota	RM_Type_III__Type_III_REases	449	defense-finder-models/RM/RM/RM_Type_III	UserReplicon_RM_Type_III_6	1	1	1	2	1	RM_Type_III__Type_III_REases	mandatory	999	4.6e-08	28.9	0.169	0.153	152	304
Bacteria	QOJ10953.1	GCA_015709495.1	Armatimonadota	RM_Type_III__Type_III_MTases	451	defense-finder-models/RM/RM/RM_Type_III	UserReplicon_RM_Type_III_6	1	1	1	2	1	RM_Type_III__Type_III_MTases	mandatory	862	1.6e-73	246	0.679	0.563	43	527
Bacteria	QOJ11229.1	GCA_015709495.1	Armatimonadota	RM_Type_IIG__Type_IIG	727	defense-finder-models/RM/RM/RM_Type_IIG	UserReplicon_RM_Type_IIG_3	1	1	1	1	1	RM_Type_IIG__Type_IIG	mandatory	1124	3.3e-173	575.8	1.035	0.809	196	1104
Bacteria	QOJ11345.1	GCA_015709495.1	Armatimonadota	Cas__cas2_I_II_III_IV_V_VI_6	843	defense-finder-models/Cas/Cas/CAS_Class2-Subtype-II-C	UserReplicon_CAS_Class2-Subtype-II-C_1	1	1	1	3	1	Cas__cas2_I_II_III_IV_V_VI_6	accessory	101	9.5e-29	97.3	0.759	0.871	1	88
Bacteria	QOJ11346.1	GCA_015709495.1	Armatimonadota	Cas__cas1_I_II_III_IV_V_VI_5	844	defense-finder-models/Cas/Cas/CAS_Class2-Subtype-II-C	UserReplicon_CAS_Class2-Subtype-II-C_1	1	1	1	3	1	Cas__cas1_I_II_III_IV_V_VI_5	accessory	306	2.4e-76	253.8	0.993	0.938	2	288
Bacteria	QOJ11347.1	GCA_015709495.1	Armatimonadota	Cas__cas9_II-A_II-B_II-C_3	845	defense-finder-models/Cas/Cas/CAS_Class2-Subtype-II-C	UserReplicon_CAS_Class2-Subtype-II-C_1	1	1	1	3	1	Cas__cas9_II-A_II-B_II-C_1	mandatory	1079	2e-66	222	0.662	0.691	6	751
Bacteria	QOJ11476.1	GCA_015709495.1	Armatimonadota	SoFic__SoFic	974	defense-finder-models/DefenseFinder_5/SoFIC/SoFic	UserReplicon_SoFic_1	1	1	1	1	1	SoFic__SoFic	mandatory	389	2.4e-118	392.7	0.986	0.938	18	382
Bacteria	QOJ12213.1	GCA_015709495.1	Armatimonadota	RM_Type_IIG__Type_IIG	1711	defense-finder-models/RM/RM/RM_Type_IIG	UserReplicon_RM_Type_IIG_4	1	1	1	1	1	RM_Type_IIG__Type_IIG	mandatory	845	3e-205	681.5	0.664	0.981	6	834
Bacteria	QOJ12482.1	GCA_015709495.1	Armatimonadota	Thoeris_II__ThsA_new_petit	1980	defense-finder-models/DefenseFinder_3/Thoeris/Thoeris_II	UserReplicon_Thoeris_II_1	1	1	1	2	1	Thoeris_II__ThsA_new_petit	mandatory	304	2.9e-15	53.9	0.788	0.632	83	274
Bacteria	QOJ12483.1	GCA_015709495.1	Armatimonadota	Thoeris__ThsB_Global	1981	defense-finder-models/DefenseFinder_3/Thoeris/Thoeris_II	UserReplicon_Thoeris_II_1	1	1	1	2	1	Thoeris__ThsB_Global	mandatory	167	2.1e-17	60.9	0.751	0.868	4	148
Bacteria	QOJ12716.1	GCA_015709495.1	Armatimonadota	RM_Type_III__Type_III_MTases	2214	defense-finder-models/RM/RM/RM_Type_III	UserReplicon_RM_Type_III_7	1	1	1	2	1	RM_Type_III__Type_III_MTases	mandatory	964	2.7e-74	248.5	0.623	0.448	55	486
Bacteria	QOJ12718.1	GCA_015709495.1	Armatimonadota	RM_Type_III__Type_III_REases	2216	defense-finder-models/RM/RM/RM_Type_III	UserReplicon_RM_Type_III_7	1	1	1	2	1	RM_Type_III__Type_III_REases	mandatory	959	6e-14	48.3	0.399	0.48	170	629
Bacteria	QOJ12740.1	GCA_015709495.1	Armatimonadota	RM_Type_II__Type_II_REases	2238	defense-finder-models/RM/RM/RM_Type_II	UserReplicon_RM_Type_II_1	1	1	1	2	1	RM_Type_II__Type_II_REases	mandatory	371	2.1e-33	114.2	1.355	0.984	6	370
Bacteria	QOJ12744.1	GCA_015709495.1	Armatimonadota	RM_Type_II__Type_II_MTases	2242	defense-finder-models/RM/RM/RM_Type_II	UserReplicon_RM_Type_II_1	1	1	1	2	1	RM_Type_II__Type_II_MTases	mandatory	480	8.2e-37	124.3	0.24	0.185	157	245
Bacteria	QOJ12924.1	GCA_015709495.1	Armatimonadota	RM_Type_IIG__Type_IIG	2422	defense-finder-models/RM/RM/RM_Type_IIG	UserReplicon_RM_Type_IIG_5	1	1	1	1	1	RM_Type_IIG__Type_IIG	mandatory	940	3.6e-284	942.4	1.002	0.971	5	917
Bacteria	QOJ13076.1	GCA_015709495.1	Armatimonadota	RM_Type_II__Type_II_REases	2574	defense-finder-models/RM/RM/RM_Type_II	UserReplicon_RM_Type_II_2	1	1	1	2	1	RM_Type_II__Type_II_REases	mandatory	481	1.5e-49	167	1.126	0.956	8	467
Bacteria	QOJ13077.1	GCA_015709495.1	Armatimonadota	RM_Type_II__Type_II_MTases	2575	defense-finder-models/RM/RM/RM_Type_II	UserReplicon_RM_Type_II_2	1	1	1	2	1	RM_Type_II__Type_II_MTases	mandatory	226	4.7e-10	35.9	0.26	0.456	7	109
Bacteria	RIJ94702.1	GCA_003577165.1	Armatimonadota	Cas__cas1_I_II_III_IV_V_VI_10	208	defense-finder-models/Cas/Cas/CAS_Cluster	UserReplicon_CAS_Cluster_1	1	1	0.06	3	1	Cas__cas1_I_II_III_IV_V_VI_1	mandatory	343	7.2e-76	252.2	0.986	0.851	6	297
Bacteria	RIJ94703.1	GCA_003577165.1	Armatimonadota	Cas__cas2_I_II_III_IV_V_VI_13	209	defense-finder-models/Cas/Cas/CAS_Cluster	UserReplicon_CAS_Cluster_1	1	1	0.06	3	1	Cas__cas2_I_II_III_IV_V_VI_1	mandatory	82	8.4e-19	64.8	0.972	0.854	1	70
Bacteria	RIJ94704.1	GCA_003577165.1	Armatimonadota	Cas__cas4_I_II_III_IV_V_VI_1	210	defense-finder-models/Cas/Cas/CAS_Cluster	UserReplicon_CAS_Cluster_1	1	1	0.06	3	1	Cas__cas4_I_II_III_IV_V_VI_1	mandatory	213	1.3e-28	97.5	0.989	0.934	11	209
Bacteria	RIJ95351.1	GCA_003577165.1	Armatimonadota	PD-T7-2__PD-T7-2_A	528	defense-finder-models/DefenseFinder_3/PD-T7-2/PD-T7-2	UserReplicon_PD-T7-2_1	1	1	1	2	1	PD-T7-2__PD-T7-2_A	mandatory	451	1.1e-40	136.8	0.832	0.734	56	386
Bacteria	RIJ95352.1	GCA_003577165.1	Armatimonadota	PD-T7-2__PD-T7-2_B	529	defense-finder-models/DefenseFinder_3/PD-T7-2/PD-T7-2	UserReplicon_PD-T7-2_1	1	1	1	2	1	PD-T7-2__PD-T7-2_B	mandatory	706	1.5e-100	334.4	0.964	0.943	2	667
Bacteria	RIJ95354.1	GCA_003577165.1	Armatimonadota	RM_Type_III__Type_III_MTases	531	defense-finder-models/RM/RM/RM_Type_III	UserReplicon_RM_Type_III_4	1	1	1	2	1	RM_Type_III__Type_III_MTases	mandatory	572	2.1e-137	457	0.892	0.927	2	531
Bacteria	RIJ95355.1	GCA_003577165.1	Armatimonadota	RM_Type_III__Type_III_REases	532	defense-finder-models/RM/RM/RM_Type_III	UserReplicon_RM_Type_III_4	1	1	1	2	1	RM_Type_III__Type_III_REases	mandatory	886	1.4e-105	351.5	0.892	0.965	14	868
Bacteria	RIJ96437.1	GCA_003577165.1	Armatimonadota	RM__Type_I_MTases	1118	defense-finder-models/RM/RM/RM_Type_I	UserReplicon_RM_Type_I_1	1	1	1	2.5	1	RM__Type_I_MTases	mandatory	543	4.1e-134	445.5	0.984	0.961	21	542
Bacteria	RIJ96439.1	GCA_003577165.1	Armatimonadota	RM__Type_I_S	1120	defense-finder-models/RM/RM/RM_Type_I	UserReplicon_RM_Type_I_1	1	1	1	2.5	1	RM__Type_I_S	accessory	442	1.6e-82	274.7	0.58	0.952	17	437
Bacteria	RIJ96443.1	GCA_003577165.1	Armatimonadota	RM__Type_I_REases	1124	defense-finder-models/RM/RM/RM_Type_I	UserReplicon_RM_Type_I_1	1	1	1	2.5	1	RM__Type_I_REases	mandatory	963	2e-134	447.3	0.905	0.9	9	875
Bacteria	RIJ96449.1	GCA_003577165.1	Armatimonadota	RM_Type_II__Type_II_MTases	1130	defense-finder-models/RM/RM/RM_Type_II	UserReplicon_RM_Type_II_2	1	1	1	2	1	RM_Type_II__Type_II_MTases	mandatory	439	1.9e-39	133	0.738	0.647	78	361
Bacteria	RIJ96450.1	GCA_003577165.1	Armatimonadota	RM_Type_II__Type_II_REases	1131	defense-finder-models/RM/RM/RM_Type_II	UserReplicon_RM_Type_II_2	1	1	1	2	1	RM_Type_II__Type_II_REases	mandatory	290	3.2e-17	60.8	0.76	0.841	26	269
Bacteria	RIJ96950.1	GCA_003577165.1	Armatimonadota	RM_Type_IV__Type_IV_REases	1481	defense-finder-models/RM/RM/RM_Type_IV	UserReplicon_RM_Type_IV_5	1	1	1	1	2	RM_Type_IV__Type_IV_REases	mandatory	357	1.4e-58	195.8	0.824	0.964	3	346
Bacteria	RIJ96951.1	GCA_003577165.1	Armatimonadota	RM_Type_IV__Type_IV_REases	1482	defense-finder-models/RM/RM/RM_Type_IV	UserReplicon_RM_Type_IV_5	1	1	1	1	2	RM_Type_IV__Type_IV_REases	mandatory	848	5.5e-70	234.2	0.663	0.33	556	835
Bacteria	RIJ97099.1	GCA_003577165.1	Armatimonadota	RM_Type_IV__Type_IV_REases	1528	defense-finder-models/RM/RM/RM_Type_IV	UserReplicon_RM_Type_IV_6	1	1	1	1	1	RM_Type_IV__Type_IV_REases	mandatory	286	3.9e-40	135.2	0.337	0.5	135	277
Bacteria	RIJ97100.1	GCA_003577165.1	Armatimonadota	SoFic__SoFic	1529	defense-finder-models/DefenseFinder_5/SoFIC/SoFic	UserReplicon_SoFic_2	1	1	1	1	1	SoFic__SoFic	mandatory	363	2.1e-101	336.9	0.958	0.956	10	356
Bacteria	RIJ97443.1	GCA_003577165.1	Armatimonadota	RM_Type_II__Type_II_MTases	1872	defense-finder-models/RM/RM/RM_Type_II	UserReplicon_RM_Type_II_3	1	1	1	2	1	RM_Type_II__Type_II_MTases	mandatory	390	1e-124	413.2	0.893	0.949	10	379
Bacteria	RIJ97445.1	GCA_003577165.1	Armatimonadota	PD-T7-5__PD-T7-5	1874	defense-finder-models/DefenseFinder_4/PD-T7-5/PD-T7-5	UserReplicon_PD-T7-5_1	1	1	1	1	1	PD-T7-5__PD-T7-5	mandatory	457	2.6e-83	277	0.926	0.751	1	343
Bacteria	RIJ97446.1	GCA_003577165.1	Armatimonadota	RM_Type_II__Type_II_REases	1875	defense-finder-models/RM/RM/RM_Type_II	UserReplicon_RM_Type_II_3	1	1	1	2	1	RM_Type_II__Type_II_REases	mandatory	378	4.6e-36	122.9	1.378	0.995	2	377
Bacteria	RIJ98199.1	GCA_003577165.1	Armatimonadota	Borvo__BovA_addition	2234	defense-finder-models/DefenseFinder_5/Borvo/Borvo	UserReplicon_Borvo_1	1	1	1	1	1	Borvo__BovA	mandatory	891	1.5e-11	41.1	0.219	0.163	717	861
Bacteria	WP_016481423.1	GCF_000427095.1	Armatimonadota	RM_Type_III__Type_III_REases	14	defense-finder-models/RM/RM/RM_Type_III	UserReplicon_RM_Type_III_3	1	1	1	2	1	RM_Type_III__Type_III_REases	mandatory	925	2.3e-09	33.3	0.215	0.326	262	563
Bacteria	WP_016481428.1	GCF_000427095.1	Armatimonadota	RM_Type_III__Type_III_MTases	18	defense-finder-models/RM/RM/RM_Type_III	UserReplicon_RM_Type_III_3	1	1	1	2	1	RM_Type_III__Type_III_MTases	mandatory	461	1e-67	226.9	0.568	0.794	51	416
Bacteria	WP_016481852.1	GCF_000427095.1	Armatimonadota	RM_Type_IV__Type_IV_REases	384	defense-finder-models/RM/RM/RM_Type_IV	UserReplicon_RM_Type_IV_4	1	1	1	1	1	RM_Type_IV__Type_IV_REases	mandatory	215	3.9e-17	60.5	0.292	0.647	59	197
Bacteria	WP_016482190.1	GCF_000427095.1	Armatimonadota	RM_Type_IIG__Type_IIG	672	defense-finder-models/RM/RM/RM_Type_IIG	UserReplicon_RM_Type_IIG_2	1	1	1	1	1	RM_Type_IIG__Type_IIG	mandatory	1579	1.8e-174	580.6	1.172	0.875	2	1382
Bacteria	WP_016482331.1	GCF_000427095.1	Armatimonadota	RM_Type_II__Type_II_REases	794	defense-finder-models/RM/RM/RM_Type_II	UserReplicon_RM_Type_II_1	1	1	1	2	1	RM_Type_II__Type_II_REases	mandatory	318	8.2e-22	75.7	0.691	0.67	68	280
Bacteria	WP_016482332.1	GCF_000427095.1	Armatimonadota	RM_Type_II__Type_II_MTases	795	defense-finder-models/RM/RM/RM_Type_II	UserReplicon_RM_Type_II_1	1	1	1	2	1	RM_Type_II__Type_II_MTases	mandatory	532	3.7e-140	465.1	1.216	0.853	77	530
Bacteria	WP_052572324.1	GCF_000427095.1	Armatimonadota	RM_Type_IV__Type_IV_REases	2566	defense-finder-models/RM/RM/RM_Type_IV	UserReplicon_RM_Type_IV_5	1	1	1	1	1	RM_Type_IV__Type_IV_REases	mandatory	150	3.9e-52	174.9	0.333	0.98	2	148
Asgard	FINAL_SR_VP_26_10_2019_2_100cm_Atabeya_2_FINAL-FINAL_SR_VP_26_10_2019_2_100cm_Atabeya_2_FINAL_1_2352	FINAL_SR_VP_26_10_2019_2_100cm_Atabeya_2_FINAL		Cas__cas2_I_II_III_IV_V_VI_3	1505	defense-finder-models/Cas/Cas/CAS_Class1-Subtype-I-B	UserReplicon_CAS_Class1-Subtype-I-B_1	1	1	1	8	1	Cas__cas2_I_II_III_IV_V_VI_3	accessory	77	8.9e-24	80.9	0.873	0.896	2	70
Asgard	FINAL_SR_VP_26_10_2019_2_100cm_Atabeya_2_FINAL-FINAL_SR_VP_26_10_2019_2_100cm_Atabeya_2_FINAL_1_2353	FINAL_SR_VP_26_10_2019_2_100cm_Atabeya_2_FINAL		Cas__cas1_I_II_III_IV_V_VI_7	1506	defense-finder-models/Cas/Cas/CAS_Class1-Subtype-I-B	UserReplicon_CAS_Class1-Subtype-I-B_1	1	1	1	8	1	Cas__cas1_I_II_III_IV_V_VI_7	accessory	323	5.7e-135	447	0.997	0.978	5	320
Asgard	FINAL_SR_VP_26_10_2019_2_100cm_Atabeya_2_FINAL-FINAL_SR_VP_26_10_2019_2_100cm_Atabeya_2_FINAL_1_2354	FINAL_SR_VP_26_10_2019_2_100cm_Atabeya_2_FINAL		Cas__cas4_I_II_III_IV_V_VI_6	1507	defense-finder-models/Cas/Cas/CAS_Class1-Subtype-I-B	UserReplicon_CAS_Class1-Subtype-I-B_1	1	1	1	8	1	Cas__cas4_I_II_III_IV_V_VI_6	accessory	162	4.3e-51	170.6	0.994	0.975	4	161
Asgard	FINAL_SR_VP_26_10_2019_2_100cm_Atabeya_2_FINAL-FINAL_SR_VP_26_10_2019_2_100cm_Atabeya_2_FINAL_1_2355	FINAL_SR_VP_26_10_2019_2_100cm_Atabeya_2_FINAL		Cas__cas3_I_5	1508	defense-finder-models/Cas/Cas/CAS_Class1-Subtype-I-B	UserReplicon_CAS_Class1-Subtype-I-B_1	1	1	1	8	1	Cas__cas3_I_5	accessory	803	1.1e-49	166.8	0.588	0.56	254	703
Asgard	FINAL_SR_VP_26_10_2019_2_100cm_Atabeya_2_FINAL-FINAL_SR_VP_26_10_2019_2_100cm_Atabeya_2_FINAL_1_2356	FINAL_SR_VP_26_10_2019_2_100cm_Atabeya_2_FINAL		Cas__cas5_I-B_17	1509	defense-finder-models/Cas/Cas/CAS_Class1-Subtype-I-B	UserReplicon_CAS_Class1-Subtype-I-B_1	1	1	1	8	1	Cas__cas5_I-B_6	mandatory	246	1.4e-40	136.8	0.901	0.931	1	229
Asgard	FINAL_SR_VP_26_10_2019_2_100cm_Atabeya_2_FINAL-FINAL_SR_VP_26_10_2019_2_100cm_Atabeya_2_FINAL_1_2357	FINAL_SR_VP_26_10_2019_2_100cm_Atabeya_2_FINAL		Cas__cas7_I-B_8	1510	defense-finder-models/Cas/Cas/CAS_Class1-Subtype-I-B	UserReplicon_CAS_Class1-Subtype-I-B_1	1	1	1	8	1	Cas__cas7_I-B_6	mandatory	352	7.3e-85	282	0.99	0.844	30	326
Asgard	FINAL_SR_VP_26_10_2019_2_100cm_Atabeya_2_FINAL-FINAL_SR_VP_26_10_2019_2_100cm_Atabeya_2_FINAL_1_2358	FINAL_SR_VP_26_10_2019_2_100cm_Atabeya_2_FINAL		Cas__cas8b1_I-B_14	1511	defense-finder-models/Cas/Cas/CAS_Class1-Subtype-I-B	UserReplicon_CAS_Class1-Subtype-I-B_1	1	1	1	8	1	Cas__cas8b2_I-B_2	mandatory	618	1.6e-127	424	0.998	0.968	1	598
Asgard	FINAL_SR_VP_26_10_2019_2_100cm_Atabeya_2_FINAL-FINAL_SR_VP_26_10_2019_2_100cm_Atabeya_2_FINAL_1_2359	FINAL_SR_VP_26_10_2019_2_100cm_Atabeya_2_FINAL		Cas__cas6_I_II_III_IV_V_VI_14	1512	defense-finder-models/Cas/Cas/CAS_Class1-Subtype-I-B	UserReplicon_CAS_Class1-Subtype-I-B_1	1	1	1	8	1	Cas__cas6_I-B_III_1	accessory	235	7.5e-48	160.9	0.983	0.996	1	234
Asgard	FINAL_SR_VP_26_10_2019_2_100cm_Atabeya_2_FINAL-FINAL_SR_VP_26_10_2019_2_100cm_Atabeya_2_FINAL_1_1131	FINAL_SR_VP_26_10_2019_2_100cm_Atabeya_2_FINAL		RM_Type_IIG__Type_IIG	149	defense-finder-models/RM/RM/RM_Type_IIG	UserReplicon_RM_Type_IIG_2	1	1	1	1	1	RM_Type_IIG__Type_IIG	mandatory	994	1.2e-214	713	1.037	0.982	13	988
Asgard	FINAL_SR_VP_26_10_2019_2_100cm_Atabeya_2_FINAL-FINAL_SR_VP_26_10_2019_2_100cm_Atabeya_2_FINAL_1_2063	FINAL_SR_VP_26_10_2019_2_100cm_Atabeya_2_FINAL		RM_Type_IV__Type_IV_REases	1184	defense-finder-models/RM/RM/RM_Type_IV	UserReplicon_RM_Type_IV_4	1	1	1	1	2	RM_Type_IV__Type_IV_REases	mandatory	428	1.4e-48	164.2	0.786	0.904	11	397
Asgard	FINAL_SR_VP_26_10_2019_2_100cm_Atabeya_2_FINAL-FINAL_SR_VP_26_10_2019_2_100cm_Atabeya_2_FINAL_1_2064	FINAL_SR_VP_26_10_2019_2_100cm_Atabeya_2_FINAL		RM_Type_IV__Type_IV_REases	1185	defense-finder-models/RM/RM/RM_Type_IV	UserReplicon_RM_Type_IV_4	1	1	1	1	2	RM_Type_IV__Type_IV_REases	mandatory	733	2e-72	242.4	0.62	0.336	465	710
Asgard	FINAL_SR_VP_26_10_2019_2_100cm_Atabeya_2_FINAL-FINAL_SR_VP_26_10_2019_2_100cm_Atabeya_2_FINAL_1_2065	FINAL_SR_VP_26_10_2019_2_100cm_Atabeya_2_FINAL		RM__Type_I_S	1186	defense-finder-models/RM/RM/RM_Type_I	UserReplicon_RM_Type_I_1	1	1	1	2.5	1	RM__Type_I_S	accessory	201	1e-29	100.6	0.249	0.886	13	190
Asgard	FINAL_SR_VP_26_10_2019_2_100cm_Atabeya_2_FINAL-FINAL_SR_VP_26_10_2019_2_100cm_Atabeya_2_FINAL_1_2066	FINAL_SR_VP_26_10_2019_2_100cm_Atabeya_2_FINAL		RM__Type_I_REases	1187	defense-finder-models/RM/RM/RM_Type_I	UserReplicon_RM_Type_I_1	1	1	1	2.5	1	RM__Type_I_REases	mandatory	955	3.6e-133	443.1	0.825	0.947	21	924
Asgard	FINAL_SR_VP_26_10_2019_2_100cm_Atabeya_2_FINAL-FINAL_SR_VP_26_10_2019_2_100cm_Atabeya_2_FINAL_1_2067	FINAL_SR_VP_26_10_2019_2_100cm_Atabeya_2_FINAL		RM__Type_I_MTases	1188	defense-finder-models/RM/RM/RM_Type_I	UserReplicon_RM_Type_I_1	1	1	1	2.5	1	RM__Type_I_MTases	mandatory	494	4.8e-168	557	0.955	0.998	1	493
Asgard	FINAL_SR_VP_26_10_2019_2_100cm_Atabeya_2_FINAL-FINAL_SR_VP_26_10_2019_2_100cm_Atabeya_2_FINAL_1_2068	FINAL_SR_VP_26_10_2019_2_100cm_Atabeya_2_FINAL		RM__Type_I_S	1189	defense-finder-models/RM/RM/RM_Type_I	UserReplicon_RM_Type_I_1	1	1	1	2.5	1	RM__Type_I_S	accessory	398	3.7e-69	231.5	0.508	0.922	32	398
Asgard	FINAL_SR_VP_26_10_2019_2_100cm_Atabeya_2_FINAL-FINAL_SR_VP_26_10_2019_2_100cm_Atabeya_2_FINAL_1_2681	FINAL_SR_VP_26_10_2019_2_100cm_Atabeya_2_FINAL		RM_Type_IIG__Type_IIG	1870	defense-finder-models/RM/RM/RM_Type_IIG	UserReplicon_RM_Type_IIG_3	1	1	1	1	1	RM_Type_IIG__Type_IIG	mandatory	892	2.8e-95	317.9	0.763	0.797	1	711
Asgard	FINAL_SR_VP_26_10_2019_2_100cm_Atabeya_2_FINAL-FINAL_SR_VP_26_10_2019_2_100cm_Atabeya_2_FINAL_1_641	FINAL_SR_VP_26_10_2019_2_100cm_Atabeya_2_FINAL		AbiEii__AbiEi_1	2379	defense-finder-models/DefenseFinder_1/AbiE/AbiE	UserReplicon_AbiE_1	1	1	1	2	1	AbiEii__AbiEi_1	mandatory	279	6.4e-11	40	0.965	0.491	87	223
Asgard	FINAL_SR_VP_26_10_2019_2_100cm_Atabeya_2_FINAL-FINAL_SR_VP_26_10_2019_2_100cm_Atabeya_2_FINAL_1_642	FINAL_SR_VP_26_10_2019_2_100cm_Atabeya_2_FINAL		AbiEii__AbiEii	2380	defense-finder-models/DefenseFinder_1/AbiE/AbiE	UserReplicon_AbiE_1	1	1	1	2	1	AbiEii__AbiEii	mandatory	264	2.4e-32	110.2	0.904	0.769	38	240
Asgard	GCA_019058495_1_ASM1905849v1-JAHPYV010000104.1_83_2	GCA_019058495_1_ASM1905849v1		PD-Lambda-5__PD-Lambda-5_B	1978	defense-finder-models/RM/PD-Lambda-5/PD-Lambda-5	UserReplicon_PD-Lambda-5_1	1	1	1	2	1	PD-Lambda-5__PD-Lambda-5_B	mandatory	311	1.1e-109	363.6	0.958	0.904	3	283
Asgard	GCA_019058495_1_ASM1905849v1-JAHPYV010000104.1_83_3	GCA_019058495_1_ASM1905849v1		PD-Lambda-5__PD-Lambda-5_A	1979	defense-finder-models/RM/PD-Lambda-5/PD-Lambda-5	UserReplicon_PD-Lambda-5_1	1	1	1	2	1	PD-Lambda-5__PD-Lambda-5_A	mandatory	486	4.7e-74	247.3	0.981	0.969	9	479
Asgard	GCA_019058495_1_ASM1905849v1-JAHPYV010000205.1_203_3	GCA_019058495_1_ASM1905849v1		RM__Type_I_S	2821	defense-finder-models/RM/RM/RM_Type_I	UserReplicon_RM_Type_I_2	1	1	1	2.5	1	RM__Type_I_S	accessory	461	2.1e-88	295.1	0.571	0.978	7	457
Asgard	GCA_019058495_1_ASM1905849v1-JAHPYV010000205.1_203_4	GCA_019058495_1_ASM1905849v1		RM__Type_I_MTases	2822	defense-finder-models/RM/RM/RM_Type_I	UserReplicon_RM_Type_I_2	1	1	1	2.5	1	RM__Type_I_MTases	mandatory	470	5.6e-170	563.9	0.957	0.983	2	463
Asgard	GCA_019058495_1_ASM1905849v1-JAHPYV010000205.1_203_5	GCA_019058495_1_ASM1905849v1		RM__Type_I_REases	2823	defense-finder-models/RM/RM/RM_Type_I	UserReplicon_RM_Type_I_2	1	1	1	2.5	1	RM__Type_I_REases	mandatory	358	4.4e-32	108.8	0.36	0.989	1	354
Asgard	GCA_019058575_1_ASM1905857v1-JAHPYU010000181.1_40_8	GCA_019058575_1_ASM1905857v1		ShosTA__ShosA	2404	defense-finder-models/DefenseFinder_2/ShosTA/ShosTA	UserReplicon_ShosTA_1	1	1	1	2	1	ShosTA__ShosA	mandatory	259	8.2e-70	232.9	0.673	0.776	48	248
Asgard	GCA_019058575_1_ASM1905857v1-JAHPYU010000181.1_40_9	GCA_019058575_1_ASM1905857v1		ShosTA__ShosT	2405	defense-finder-models/DefenseFinder_2/ShosTA/ShosTA	UserReplicon_ShosTA_1	1	1	1	2	1	ShosTA__ShosT	mandatory	216	1.4e-20	71.6	0.565	0.62	61	194
Asgard	GCA_019058575_1_ASM1905857v1-JAHPYU010000026.1_82_2	GCA_019058575_1_ASM1905857v1		RM__Type_I_S	911	defense-finder-models/RM/RM/RM_Type_I	UserReplicon_RM_Type_I_2	1	1	1	2.5	1	RM__Type_I_S	accessory	483	1.4e-75	252.9	0.574	0.967	6	472
Asgard	GCA_019058575_1_ASM1905857v1-JAHPYU010000026.1_82_3	GCA_019058575_1_ASM1905857v1		RM__Type_I_MTases	912	defense-finder-models/RM/RM/RM_Type_I	UserReplicon_RM_Type_I_2	1	1	1	2.5	1	RM__Type_I_MTases	mandatory	466	4.7e-159	527.9	0.957	0.989	2	462
Asgard	GCA_019058575_1_ASM1905857v1-JAHPYU010000026.1_82_4	GCA_019058575_1_ASM1905857v1		RM__Type_I_REases	913	defense-finder-models/RM/RM/RM_Type_I	UserReplicon_RM_Type_I_2	1	1	1	2.5	1	RM__Type_I_REases	mandatory	889	4.6e-156	519.1	0.847	0.987	7	883
Asgard	GCA_019058575_1_ASM1905857v1-JAHPYU010000066.1_319_1	GCA_019058575_1_ASM1905857v1		RM__Type_I_MTases	1511	defense-finder-models/RM/RM/RM_Type_I	UserReplicon_RM_Type_I_3	1	1	1	2.5	1	RM__Type_I_MTases	mandatory	501	1.3e-123	410.7	0.947	0.966	14	497
Asgard	GCA_019058575_1_ASM1905857v1-JAHPYU010000066.1_319_4	GCA_019058575_1_ASM1905857v1		RM__Type_I_S	1515	defense-finder-models/RM/RM/RM_Type_I	UserReplicon_RM_Type_I_3	1	1	1	2.5	1	RM__Type_I_S	accessory	413	4.5e-71	238	0.547	0.961	17	413
Asgard	GCA_019058575_1_ASM1905857v1-JAHPYU010000066.1_319_7	GCA_019058575_1_ASM1905857v1		RM__Type_I_REases	1518	defense-finder-models/RM/RM/RM_Type_I	UserReplicon_RM_Type_I_3	1	1	1	2.5	1	RM__Type_I_REases	mandatory	777	5.4e-108	360.1	0.555	0.728	3	568
Asgard	GCA_019058575_1_ASM1905857v1-JAHPYU010000081.1_338_5	GCA_019058575_1_ASM1905857v1		PD-Lambda-5__PD-Lambda-5_A	1681	defense-finder-models/RM/PD-Lambda-5/PD-Lambda-5	UserReplicon_PD-Lambda-5_1	1	1	1	2	1	PD-Lambda-5__PD-Lambda-5_A	mandatory	486	5e-74	247.3	0.981	0.969	9	479
Asgard	GCA_019058575_1_ASM1905857v1-JAHPYU010000081.1_338_6	GCA_019058575_1_ASM1905857v1		PD-Lambda-5__PD-Lambda-5_B	1682	defense-finder-models/RM/PD-Lambda-5/PD-Lambda-5	UserReplicon_PD-Lambda-5_1	1	1	1	2	1	PD-Lambda-5__PD-Lambda-5_B	mandatory	311	1.2e-109	363.6	0.958	0.904	3	283
Asgard	GCA_019058575_1_ASM1905857v1-JAHPYU010000158.1_12_3	GCA_019058575_1_ASM1905857v1		RM_Type_IIG__Type_IIG	2255	defense-finder-models/RM/RM/RM_Type_IIG	UserReplicon_RM_Type_IIG_4	1	1	1	1	1	RM_Type_IIG__Type_IIG	mandatory	989	1.4e-157	524.4	0.99	0.987	11	986
Asgard	GCA_019058575_1_ASM1905857v1-JAHPYU010000262.1_139_1	GCA_019058575_1_ASM1905857v1		RM_Type_IIG__Type_IIG	2822	defense-finder-models/RM/RM/RM_Type_IIG	UserReplicon_RM_Type_IIG_5	1	1	1	1	1	RM_Type_IIG__Type_IIG	mandatory	1049	9.8e-103	342.9	0.84	0.905	80	1028
Asgard	GCA_019058575_1_ASM1905857v1-JAHPYU010000300.1_186_1	GCA_019058575_1_ASM1905857v1		RM_Type_IIG__Type_IIG	2978	defense-finder-models/RM/RM/RM_Type_IIG	UserReplicon_RM_Type_IIG_6	1	1	1	1	1	RM_Type_IIG__Type_IIG	mandatory	957	1.9e-157	523.9	0.99	0.993	7	956
Asgard	GCA_019058575_1_ASM1905857v1-JAHPYU010000004.1_322_15	GCA_019058575_1_ASM1905857v1		pAgo__pAgo_LongA	229	defense-finder-models/DefenseFinder_5/pAgo/pAgo	UserReplicon_pAgo_4	1	1	1	1	1	pAgo__pAgo_LongA	mandatory	736	3.3e-51	172	0.816	0.844	110	730
Asgard	GCA_019058575_1_ASM1905857v1-JAHPYU010000019.1_30_17	GCA_019058575_1_ASM1905857v1		pAgo__pAgo_LongA	758	defense-finder-models/DefenseFinder_5/pAgo/pAgo	UserReplicon_pAgo_5	1	1	1	1	1	pAgo__pAgo_LongA	mandatory	750	4e-67	224.6	0.883	0.892	78	746
Asgard	GCA_019058575_1_ASM1905857v1-JAHPYU010000225.1_91_1	GCA_019058575_1_ASM1905857v1		CBASS__OGG	2638	defense-finder-models/DefenseFinder_5/CBASS/CBASS_IV	UserReplicon_CBASS_IV_3	1	1	1	3	1	CBASS__TGT	mandatory	96	1.3e-32	110.7	0.402	0.896	10	95
Asgard	GCA_019058575_1_ASM1905857v1-JAHPYU010000225.1_91_2	GCA_019058575_1_ASM1905857v1		CBASS__2TM_type_IV	2639	defense-finder-models/DefenseFinder_5/CBASS/CBASS_IV	UserReplicon_CBASS_IV_3	1	1	1	3	1	CBASS__Effector_2TM_S_2TMBeta	mandatory	198	2.9e-30	103.1	0.924	0.919	4	185
Asgard	GCA_019058575_1_ASM1905857v1-JAHPYU010000225.1_91_3	GCA_019058575_1_ASM1905857v1		CBASS__Cyclase_SMODS	2640	defense-finder-models/DefenseFinder_5/CBASS/CBASS_IV	UserReplicon_CBASS_IV_3	1	1	1	3	1	CBASS__Cyclase_SMODS	mandatory	309	1.5e-13	48.9	0.902	0.443	49	185
Asgard	GCA_019058575_1_ASM1905857v1-JAHPYU010000225.1_91_4	GCA_019058575_1_ASM1905857v1		CBASS__TGT	2641	defense-finder-models/DefenseFinder_5/CBASS/CBASS_IV	UserReplicon_CBASS_IV_3	1	1	1	3	1	CBASS__TGT	mandatory	338	1.5e-100	334.1	0.988	0.988	1	334
Asgard	GCA_019058575_1_ASM1905857v1-JAHPYU010000225.1_91_5	GCA_019058575_1_ASM1905857v1		CBASS__QueC	2642	defense-finder-models/DefenseFinder_5/CBASS/CBASS_IV	UserReplicon_CBASS_IV_3	1	1	1	3	1	CBASS__TGT	mandatory	192	3.4e-72	240.1	0.968	0.943	11	191
Asgard	GCA_019058575_1_ASM1905857v1-JAHPYU010000377.1_271_4	GCA_019058575_1_ASM1905857v1		Lamassu-Fam__LmuA_effector_Protease	3278	defense-finder-models/DefenseFinder_1/Lamassu-Fam/Lamassu-Fam	UserReplicon_Lamassu-Fam_1	1	1	0.667	2	1	Lamassu-Fam__LmuA_effector_Cap4_nuclease_II	mandatory	268	3.9e-08	30.4	0.379	0.552	84	231
Asgard	GCA_019058575_1_ASM1905857v1-JAHPYU010000378.1_272_2	GCA_019058575_1_ASM1905857v1		Lamassu-Fam__LmuB_SMC_Cap4_nuclease_II	3281	defense-finder-models/DefenseFinder_1/Lamassu-Fam/Lamassu-Fam	UserReplicon_Lamassu-Fam_1	1	1	0.667	2	1	Lamassu-Fam__LmuB_SMC_Cap4_nuclease_II	mandatory	358	3.5e-05	20.6	0.201	0.45	74	234
Asgard	SR_VP_9_9_2021_9_1B_1_5m_Archaea_47_83_contigs-SR_VP_9_9_2021_9_1B_1_5m_scaffold_197_48_24	SR_VP_9_9_2021_9_1B_1_5m_Archaea_47_83_contigs		Cas__cas6_I_II_III_IV_V_VI_14	643	defense-finder-models/Cas/Cas/CAS_Class1-Subtype-I-B	UserReplicon_CAS_Class1-Subtype-I-B_1	1	1	0.625	5	1	Cas__cas6_I-B_III_1	accessory	235	7.8e-48	160.9	0.983	0.996	1	234
Asgard	SR_VP_9_9_2021_9_1B_1_5m_Archaea_47_83_contigs-SR_VP_9_9_2021_9_1B_1_5m_scaffold_197_48_25	SR_VP_9_9_2021_9_1B_1_5m_Archaea_47_83_contigs		Cas__cas8b1_I-B_14	644	defense-finder-models/Cas/Cas/CAS_Class1-Subtype-I-B	UserReplicon_CAS_Class1-Subtype-I-B_1	1	1	0.625	5	1	Cas__cas8b2_I-B_2	mandatory	618	1.7e-127	424	0.998	0.968	1	598
Asgard	SR_VP_9_9_2021_9_1B_1_5m_Archaea_47_83_contigs-SR_VP_9_9_2021_9_1B_1_5m_scaffold_197_48_26	SR_VP_9_9_2021_9_1B_1_5m_Archaea_47_83_contigs		Cas__cas7_I-B_8	645	defense-finder-models/Cas/Cas/CAS_Class1-Subtype-I-B	UserReplicon_CAS_Class1-Subtype-I-B_1	1	1	0.625	5	1	Cas__cas7_I-B_6	mandatory	352	7.6e-85	282	0.99	0.844	30	326
Asgard	SR_VP_9_9_2021_9_1B_1_5m_Archaea_47_83_contigs-SR_VP_9_9_2021_9_1B_1_5m_scaffold_197_48_27	SR_VP_9_9_2021_9_1B_1_5m_Archaea_47_83_contigs		Cas__cas5_I-B_17	646	defense-finder-models/Cas/Cas/CAS_Class1-Subtype-I-B	UserReplicon_CAS_Class1-Subtype-I-B_1	1	1	0.625	5	1	Cas__cas5_I-B_6	mandatory	246	1.4e-40	136.8	0.901	0.931	1	229
Asgard	SR_VP_9_9_2021_9_1B_1_5m_Archaea_47_83_contigs-SR_VP_9_9_2021_9_1B_1_5m_scaffold_197_48_28	SR_VP_9_9_2021_9_1B_1_5m_Archaea_47_83_contigs		Cas__cas3_I_5	647	defense-finder-models/Cas/Cas/CAS_Class1-Subtype-I-B	UserReplicon_CAS_Class1-Subtype-I-B_1	1	1	0.625	5	1	Cas__cas3_I_5	accessory	803	1.1e-49	166.8	0.588	0.56	254	703
Asgard	SR_VP_9_9_2021_9_1B_1_5m_Archaea_47_83_contigs-SR_VP_9_9_2021_9_1B_1_5m_scaffold_2023_106_9	SR_VP_9_9_2021_9_1B_1_5m_Archaea_47_83_contigs		RM_Type_IIG__Type_IIG	736	defense-finder-models/RM/RM/RM_Type_IIG	UserReplicon_RM_Type_IIG_2	1	1	1	1	1	RM_Type_IIG__Type_IIG	mandatory	892	2.9e-95	317.9	0.763	0.797	1	711
Asgard	SR_VP_9_9_2021_9_1B_1_5m_Archaea_47_83_contigs-SR_VP_9_9_2021_9_1B_1_5m_scaffold_226_53_44	SR_VP_9_9_2021_9_1B_1_5m_Archaea_47_83_contigs		RM_Type_IV__Type_IV_REases	887	defense-finder-models/RM/RM/RM_Type_IV	UserReplicon_RM_Type_IV_4	1	1	1	1	1	RM_Type_IV__Type_IV_REases	mandatory	360	4.5e-43	146.1	0.663	0.908	3	329
Asgard	SR_VP_9_9_2021_9_1B_1_5m_Archaea_47_83_contigs-SR_VP_9_9_2021_9_1B_1_5m_scaffold_686_82_9	SR_VP_9_9_2021_9_1B_1_5m_Archaea_47_83_contigs		RM_Type_IIG__Type_IIG	2282	defense-finder-models/RM/RM/RM_Type_IIG	UserReplicon_RM_Type_IIG_3	1	1	1	1	1	RM_Type_IIG__Type_IIG	mandatory	994	1.2e-214	713	1.037	0.982	13	988
Asgard	SR_VP_9_9_2021_9_1B_1_5m_Archaea_47_83_contigs-SR_VP_9_9_2021_9_1B_1_5m_scaffold_806_85_2	SR_VP_9_9_2021_9_1B_1_5m_Archaea_47_83_contigs		RM_Type_IV__Type_IV_REases	2385	defense-finder-models/RM/RM/RM_Type_IV	UserReplicon_RM_Type_IV_5	1	1	1	1	1	RM_Type_IV__Type_IV_REases	mandatory	733	2.1e-72	242.4	0.62	0.336	465	710
Asgard	SR_VP_9_9_2021_9_1B_1_5m_Archaea_47_83_contigs-SR_VP_9_9_2021_9_1B_1_5m_scaffold_806_85_3	SR_VP_9_9_2021_9_1B_1_5m_Archaea_47_83_contigs		RM__Type_I_S	2386	defense-finder-models/RM/RM/RM_Type_I	UserReplicon_RM_Type_I_1	1	1	1	2.5	1	RM__Type_I_S	accessory	201	1.1e-29	100.6	0.249	0.886	13	190
Asgard	SR_VP_9_9_2021_9_1B_1_5m_Archaea_47_83_contigs-SR_VP_9_9_2021_9_1B_1_5m_scaffold_806_85_4	SR_VP_9_9_2021_9_1B_1_5m_Archaea_47_83_contigs		RM__Type_I_REases	2387	defense-finder-models/RM/RM/RM_Type_I	UserReplicon_RM_Type_I_1	1	1	1	2.5	1	RM__Type_I_REases	mandatory	955	3.7e-133	443.1	0.825	0.947	21	924
Asgard	SR_VP_9_9_2021_9_1B_1_5m_Archaea_47_83_contigs-SR_VP_9_9_2021_9_1B_1_5m_scaffold_806_85_5	SR_VP_9_9_2021_9_1B_1_5m_Archaea_47_83_contigs		RM__Type_I_MTases	2388	defense-finder-models/RM/RM/RM_Type_I	UserReplicon_RM_Type_I_1	1	1	1	2.5	1	RM__Type_I_MTases	mandatory	494	5e-168	557	0.955	0.998	1	493
Asgard	SR_VP_9_9_2021_9_1B_1_5m_Archaea_47_83_contigs-SR_VP_9_9_2021_9_1B_1_5m_scaffold_806_85_6	SR_VP_9_9_2021_9_1B_1_5m_Archaea_47_83_contigs		RM__Type_I_S	2389	defense-finder-models/RM/RM/RM_Type_I	UserReplicon_RM_Type_I_1	1	1	1	2.5	1	RM__Type_I_S	accessory	398	3.8e-69	231.5	0.508	0.922	32	398
Asgard	SRVP18_trench_6_60cm_Atabeya_1_Complete_Final-SRVP18_trench_6_60cm_Atabeya_1_Complete_Final_1_2189	SRVP18_trench_6_60cm_Atabeya_1_Complete_Final		Cas__cas2_I_II_III_IV_V_VI_3	1323	defense-finder-models/Cas/Cas/CAS_Class1-Subtype-I-B	UserReplicon_CAS_Class1-Subtype-I-B_1	1	1	1	8	1	Cas__cas2_I_II_III_IV_V_VI_3	accessory	71	4.4e-20	69.1	0.797	0.887	2	64
Asgard	SRVP18_trench_6_60cm_Atabeya_1_Complete_Final-SRVP18_trench_6_60cm_Atabeya_1_Complete_Final_1_2190	SRVP18_trench_6_60cm_Atabeya_1_Complete_Final		Cas__cas1_I_II_III_IV_V_VI_7	1325	defense-finder-models/Cas/Cas/CAS_Class1-Subtype-I-B	UserReplicon_CAS_Class1-Subtype-I-B_1	1	1	1	8	1	Cas__cas1_I_II_III_IV_V_VI_7	accessory	323	2.2e-134	445	0.997	0.978	5	320
Asgard	SRVP18_trench_6_60cm_Atabeya_1_Complete_Final-SRVP18_trench_6_60cm_Atabeya_1_Complete_Final_1_2191	SRVP18_trench_6_60cm_Atabeya_1_Complete_Final		Cas__cas4_I_II_III_IV_V_VI_6	1326	defense-finder-models/Cas/Cas/CAS_Class1-Subtype-I-B	UserReplicon_CAS_Class1-Subtype-I-B_1	1	1	1	8	1	Cas__cas4_I_II_III_IV_V_VI_6	accessory	162	2.8e-51	171.2	0.994	0.975	4	161
Asgard	SRVP18_trench_6_60cm_Atabeya_1_Complete_Final-SRVP18_trench_6_60cm_Atabeya_1_Complete_Final_1_2192	SRVP18_trench_6_60cm_Atabeya_1_Complete_Final		Cas__cas3_I_2	1327	defense-finder-models/Cas/Cas/CAS_Class1-Subtype-I-B	UserReplicon_CAS_Class1-Subtype-I-B_1	1	1	1	8	1	Cas__cas3_I_5	accessory	757	6.7e-75	249.7	0.98	0.461	259	607
Asgard	SRVP18_trench_6_60cm_Atabeya_1_Complete_Final-SRVP18_trench_6_60cm_Atabeya_1_Complete_Final_1_2193	SRVP18_trench_6_60cm_Atabeya_1_Complete_Final		Cas__cas5_I-B_6	1328	defense-finder-models/Cas/Cas/CAS_Class1-Subtype-I-B	UserReplicon_CAS_Class1-Subtype-I-B_1	1	1	1	8	1	Cas__cas5_I-B_6	mandatory	233	1.7e-25	87.6	0.807	0.635	10	157
Asgard	SRVP18_trench_6_60cm_Atabeya_1_Complete_Final-SRVP18_trench_6_60cm_Atabeya_1_Complete_Final_1_2194	SRVP18_trench_6_60cm_Atabeya_1_Complete_Final		Cas__cas7_I-B_6	1329	defense-finder-models/Cas/Cas/CAS_Class1-Subtype-I-B	UserReplicon_CAS_Class1-Subtype-I-B_1	1	1	1	8	1	Cas__cas7_I-B_6	mandatory	307	6.5e-65	216.6	0.977	0.948	10	300
Asgard	SRVP18_trench_6_60cm_Atabeya_1_Complete_Final-SRVP18_trench_6_60cm_Atabeya_1_Complete_Final_1_2195	SRVP18_trench_6_60cm_Atabeya_1_Complete_Final		Cas__cas8b2_I-B_7	1330	defense-finder-models/Cas/Cas/CAS_Class1-Subtype-I-B	UserReplicon_CAS_Class1-Subtype-I-B_1	1	1	1	8	1	Cas__cas8b2_I-B_2	mandatory	444	9.9e-93	308.7	0.977	0.998	1	443
Asgard	SRVP18_trench_6_60cm_Atabeya_1_Complete_Final-SRVP18_trench_6_60cm_Atabeya_1_Complete_Final_1_2196	SRVP18_trench_6_60cm_Atabeya_1_Complete_Final		Cas__cas6_I_II_III_IV_V_VI_14	1331	defense-finder-models/Cas/Cas/CAS_Class1-Subtype-I-B	UserReplicon_CAS_Class1-Subtype-I-B_1	1	1	1	8	1	Cas__cas6_I-B_III_1	accessory	235	2.4e-47	159.2	0.983	0.996	1	234
Asgard	SRVP18_trench_6_60cm_Atabeya_1_Complete_Final-SRVP18_trench_6_60cm_Atabeya_1_Complete_Final_1_1971	SRVP18_trench_6_60cm_Atabeya_1_Complete_Final		RM__Type_I_REases	1081	defense-finder-models/RM/RM/RM_Type_I	UserReplicon_RM_Type_I_1	1	1	1	2.5	2	RM__Type_I_REases	mandatory	375	4.4e-11	39.1	0.173	0.443	14	179
Asgard	SRVP18_trench_6_60cm_Atabeya_1_Complete_Final-SRVP18_trench_6_60cm_Atabeya_1_Complete_Final_1_1977	SRVP18_trench_6_60cm_Atabeya_1_Complete_Final		RM__Type_I_REases	1087	defense-finder-models/RM/RM/RM_Type_I	UserReplicon_RM_Type_I_1	1	1	1	2.5	2	RM__Type_I_REases	mandatory	889	6.7e-151	501.7	0.848	0.989	6	884
Asgard	SRVP18_trench_6_60cm_Atabeya_1_Complete_Final-SRVP18_trench_6_60cm_Atabeya_1_Complete_Final_1_1978	SRVP18_trench_6_60cm_Atabeya_1_Complete_Final		RM__Type_I_MTases	1088	defense-finder-models/RM/RM/RM_Type_I	UserReplicon_RM_Type_I_1	1	1	1	2.5	2	RM__Type_I_MTases	mandatory	470	1.1e-160	533.1	0.953	0.977	2	460
Asgard	SRVP18_trench_6_60cm_Atabeya_1_Complete_Final-SRVP18_trench_6_60cm_Atabeya_1_Complete_Final_1_1979	SRVP18_trench_6_60cm_Atabeya_1_Complete_Final		RM__Type_I_S	1089	defense-finder-models/RM/RM/RM_Type_I	UserReplicon_RM_Type_I_1	1	1	1	2.5	2	RM__Type_I_S	accessory	498	1.4e-49	166.7	0.3	0.458	262	489
Asgard	SRVP18_trench_6_60cm_Atabeya_1_Complete_Final-SRVP18_trench_6_60cm_Atabeya_1_Complete_Final_1_2572	SRVP18_trench_6_60cm_Atabeya_1_Complete_Final		RM_Type_IIG__Type_IIG	1749	defense-finder-models/RM/RM/RM_Type_IIG	UserReplicon_RM_Type_IIG_3	1	1	1	1	1	RM_Type_IIG__Type_IIG	mandatory	1016	1.7e-129	431.1	0.992	0.988	8	1011
Asgard	SRVP18_trench_6_60cm_Atabeya_1_Complete_Final-SRVP18_trench_6_60cm_Atabeya_1_Complete_Final_1_588	SRVP18_trench_6_60cm_Atabeya_1_Complete_Final		RM_Type_IIG__Type_IIG	2326	defense-finder-models/RM/RM/RM_Type_IIG	UserReplicon_RM_Type_IIG_4	1	1	1	1	1	RM_Type_IIG__Type_IIG	mandatory	995	1.6e-210	699.3	1.023	0.963	30	987
Asgard	SRVP18_trench_6_60cm_Atabeya_1_Complete_Final-SRVP18_trench_6_60cm_Atabeya_1_Complete_Final_1_636	SRVP18_trench_6_60cm_Atabeya_1_Complete_Final		RM_Type_II__Type_II_MTases	2380	defense-finder-models/RM/RM/RM_Type_II	UserReplicon_RM_Type_II_2	1	1	1	2	1	RM_Type_II__Type_II_MTases	mandatory	318	1.1e-89	297.7	0.724	0.887	10	291
Asgard	SRVP18_trench_6_60cm_Atabeya_1_Complete_Final-SRVP18_trench_6_60cm_Atabeya_1_Complete_Final_1_637	SRVP18_trench_6_60cm_Atabeya_1_Complete_Final		RM_Type_II__Type_II_REases	2381	defense-finder-models/RM/RM/RM_Type_II	UserReplicon_RM_Type_II_2	1	1	1	2	1	RM_Type_II__Type_II_REases	mandatory	292	2.3e-59	198.3	1.011	0.908	15	279
Bacteria	HBY56383.1	GCA_003513845.1	Atribacterota	BREX__brxL	137	defense-finder-models/DefenseFinder_5/BREX/BREX_I	UserReplicon_BREX_I_2	1	1	0.833	3.5	1	BREX__brxL	mandatory	683	3.1e-213	706.9	0.799	0.919	6	633
Bacteria	HBY56384.1	GCA_003513845.1	Atribacterota	BREX__pglZA	138	defense-finder-models/DefenseFinder_5/BREX/BREX_I	UserReplicon_BREX_I_2	1	1	0.833	3.5	1	BREX__pglZB	mandatory	746	2.4e-32	109.2	0.678	0.71	134	663
Bacteria	HBY56385.1	GCA_003513845.1	Atribacterota	BREX__pglX1	139	defense-finder-models/DefenseFinder_5/BREX/BREX_I	UserReplicon_BREX_I_2	1	1	0.833	3.5	1	BREX__pglX1	accessory	1230	2.4e-223	741.1	0.903	0.991	2	1220
Bacteria	HBY56386.1	GCA_003513845.1	Atribacterota	BREX__brxC	140	defense-finder-models/DefenseFinder_5/BREX/BREX_I	UserReplicon_BREX_I_2	1	1	0.833	3.5	1	BREX__brxC	accessory	1197	1.9e-158	526.6	0.963	0.996	3	1194
Bacteria	HBY56388.1	GCA_003513845.1	Atribacterota	BREX__brxA_DUF1819	142	defense-finder-models/DefenseFinder_5/BREX/BREX_I	UserReplicon_BREX_I_2	1	1	0.833	3.5	1	BREX__brxA_DUF1819	accessory	279	2e-16	57.2	0.81	0.556	36	190
Bacteria	HBY56973.1	GCA_003513845.1	Atribacterota	Cas__cas6_I_II_III_IV_V_VI_17	727	defense-finder-models/Cas/Cas/CAS_Class1-Subtype-III-A	UserReplicon_CAS_Class1-Subtype-III-A_2	1	1	1	9	1	Cas__cas6_I_II_III_IV_V_VI_15	accessory	331	3.6e-98	325.5	0.975	0.973	7	328
Bacteria	HBY56974.1	GCA_003513845.1	Atribacterota	Cas__cas10_III-A_1	728	defense-finder-models/Cas/Cas/CAS_Class1-Subtype-III-A	UserReplicon_CAS_Class1-Subtype-III-A_2	1	1	1	9	1	Cas__cas10_III-A_1	mandatory	856	4e-146	485	1	0.84	7	725
Bacteria	HBY56975.1	GCA_003513845.1	Atribacterota	Cas__csm2gr11_III-A_15	729	defense-finder-models/Cas/Cas/CAS_Class1-Subtype-III-A	UserReplicon_CAS_Class1-Subtype-III-A_2	1	1	1	9	1	Cas__csm2gr11_III-A_15	mandatory	160	1.9e-19	67.5	0.936	0.669	35	141
Bacteria	HBY56976.1	GCA_003513845.1	Atribacterota	Cas__csm3gr7_III-A_1	730	defense-finder-models/Cas/Cas/CAS_Class1-Subtype-III-A	UserReplicon_CAS_Class1-Subtype-III-A_2	1	1	1	9	1	Cas__csm3gr7_III-A_1	mandatory	252	2.8e-75	249.6	0.949	0.861	8	224
Bacteria	HBY56977.1	GCA_003513845.1	Atribacterota	Cas__csm4gr5_III-A_2	731	defense-finder-models/Cas/Cas/CAS_Class1-Subtype-III-A	UserReplicon_CAS_Class1-Subtype-III-A_2	1	1	1	9	1	Cas__csm4gr5_III-A_2	mandatory	341	4.4e-72	239.8	0.991	0.994	1	339
Bacteria	HBY56978.1	GCA_003513845.1	Atribacterota	Cas__csm5gr7_III-A_2	732	defense-finder-models/Cas/Cas/CAS_Class1-Subtype-III-A	UserReplicon_CAS_Class1-Subtype-III-A_2	1	1	1	9	1	Cas__csm5gr7_III-A_2	mandatory	342	4.1e-28	95.5	0.885	0.921	7	321
Bacteria	HBY56979.1	GCA_003513845.1	Atribacterota	Cas__csx1_III_11	733	defense-finder-models/Cas/Cas/CAS_Class1-Subtype-III-A	UserReplicon_CAS_Class1-Subtype-III-A_2	1	1	1	9	1	Cas__csx1_III_10	accessory	426	3e-73	243.7	0.976	0.873	22	393
Bacteria	HBY56980.1	GCA_003513845.1	Atribacterota	Cas__cas1_I_II_III_IV_V_VI_10	734	defense-finder-models/Cas/Cas/CAS_Class1-Subtype-III-A	UserReplicon_CAS_Class1-Subtype-III-A_2	1	1	1	9	1	Cas__cas1_I_II_III_IV_V_VI_10	accessory	324	8.5e-89	294.3	1	0.877	4	287
Bacteria	HBY56981.1	GCA_003513845.1	Atribacterota	Cas__cas2_I_II_III_IV_V_VI_3	735	defense-finder-models/Cas/Cas/CAS_Class1-Subtype-III-A	UserReplicon_CAS_Class1-Subtype-III-A_2	1	1	1	9	1	Cas__cas2_I_II_III_IV_V_VI_5	accessory	92	2.3e-28	95.1	0.975	0.837	5	81
Bacteria	HBY57038.1	GCA_003513845.1	Atribacterota	RM_Type_II__Type_II_REases	792	defense-finder-models/RM/RM/RM_Type_II	UserReplicon_RM_Type_II_1	1	1	1	2	1	RM_Type_II__Type_II_REases	mandatory	257	5.8e-24	82.5	0.733	0.903	24	255
Bacteria	HBY57039.1	GCA_003513845.1	Atribacterota	RM_Type_II__Type_II_MTases	793	defense-finder-models/RM/RM/RM_Type_II	UserReplicon_RM_Type_II_1	1	1	1	2	1	RM_Type_II__Type_II_MTases	mandatory	534	1.1e-31	107	0.415	0.309	79	243
Bacteria	HBY57285.1	GCA_003513845.1	Atribacterota	RM_Type_II__Type_II_MTases	1039	defense-finder-models/RM/RM/RM_Type_II	UserReplicon_RM_Type_II_2	1	1	1	2	1	RM_Type_II__Type_II_MTases	mandatory	524	4.5e-76	253.2	0.735	0.523	47	320
Bacteria	HBY57286.1	GCA_003513845.1	Atribacterota	RM_Type_II__Type_II_REases	1040	defense-finder-models/RM/RM/RM_Type_II	UserReplicon_RM_Type_II_2	1	1	1	2	1	RM_Type_II__Type_II_REases	mandatory	377	6.8e-16	55.1	0.496	0.347	245	375
Bacteria	HBY57396.1	GCA_003513845.1	Atribacterota	RM_Type_IV__Type_IV_REases	1150	defense-finder-models/RM/RM/RM_Type_IV	UserReplicon_RM_Type_IV_4	1	1	1	1	1	RM_Type_IV__Type_IV_REases	mandatory	305	5e-56	187.2	0.411	0.616	114	301
Bacteria	HBY57401.1	GCA_003513845.1	Atribacterota	AbiEii__AbiEi_1	1155	defense-finder-models/DefenseFinder_1/AbiE/AbiE	UserReplicon_AbiE_1	1	1	1	2	1	AbiEii__AbiEi_1	mandatory	261	2e-11	41.1	0.979	0.529	78	215
Bacteria	HBY57402.1	GCA_003513845.1	Atribacterota	AbiEii__AbiEii	1156	defense-finder-models/DefenseFinder_1/AbiE/AbiE	UserReplicon_AbiE_1	1	1	1	2	1	AbiEii__AbiEii	mandatory	284	4.5e-32	108.7	0.929	0.81	37	266
Bacteria	HBY57404.1	GCA_003513845.1	Atribacterota	Cas__WYL_I_II_III_IV_V_VI_1	1158	defense-finder-models/Cas/Cas/CAS_Class1-Subtype-I-B	UserReplicon_CAS_Class1-Subtype-I-B_1	1	1	1	8	1	Cas__WYL_I_II_III_IV_V_VI_1	neutral	312	1.6e-53	179.1	0.958	0.994	2	311
Bacteria	HBY57405.1	GCA_003513845.1	Atribacterota	Cas__cas8b1_I-B_14	1159	defense-finder-models/Cas/Cas/CAS_Class1-Subtype-I-B	UserReplicon_CAS_Class1-Subtype-I-B_1	1	1	1	8	1	Cas__cas8b2_I-B_2	mandatory	636	8e-138	457.5	0.998	0.975	1	620
Bacteria	HBY57406.1	GCA_003513845.1	Atribacterota	Cas__cas7_I-B_8	1160	defense-finder-models/Cas/Cas/CAS_Class1-Subtype-I-B	UserReplicon_CAS_Class1-Subtype-I-B_1	1	1	1	8	1	Cas__cas7_I-B_6	mandatory	299	2.7e-91	302.6	0.997	0.923	8	283
Bacteria	HBY57407.1	GCA_003513845.1	Atribacterota	Cas__cas5_I-B_17	1161	defense-finder-models/Cas/Cas/CAS_Class1-Subtype-I-B	UserReplicon_CAS_Class1-Subtype-I-B_1	1	1	1	8	1	Cas__cas5_I-B_6	mandatory	250	4.1e-43	144.6	0.715	0.716	3	181
Bacteria	HBY57408.1	GCA_003513845.1	Atribacterota	Cas__cas3_I_5	1162	defense-finder-models/Cas/Cas/CAS_Class1-Subtype-I-B	UserReplicon_CAS_Class1-Subtype-I-B_1	1	1	1	8	1	Cas__cas3_I_5	accessory	843	1.1e-53	179.4	0.762	0.702	206	797
Bacteria	HBY57409.1	GCA_003513845.1	Atribacterota	Cas__cas6_I_II_III_IV_V_VI_12	1163	defense-finder-models/Cas/Cas/CAS_Class1-Subtype-I-B	UserReplicon_CAS_Class1-Subtype-I-B_1	1	1	1	8	1	Cas__cas6_I-B_III_1	accessory	222	4.6e-79	261.8	0.995	0.977	1	217
Bacteria	HBY57410.1	GCA_003513845.1	Atribacterota	Cas__cas1_I_II_III_IV_V_VI_1	1164	defense-finder-models/Cas/Cas/CAS_Class1-Subtype-I-B	UserReplicon_CAS_Class1-Subtype-I-B_1	1	1	1	8	1	Cas__cas1_I_II_III_IV_V_VI_7	accessory	324	1.7e-89	296.8	0.997	0.991	1	321
Bacteria	HBY57411.1	GCA_003513845.1	Atribacterota	Cas__cas2_I_II_III_IV_V_VI_3	1165	defense-finder-models/Cas/Cas/CAS_Class1-Subtype-I-B	UserReplicon_CAS_Class1-Subtype-I-B_1	1	1	1	8	1	Cas__cas2_I_II_III_IV_V_VI_3	accessory	96	3.5e-26	88.1	0.975	0.812	3	80
Bacteria	HBY57412.1	GCA_003513845.1	Atribacterota	Cas__cas4_I_II_III_IV_V_VI_1	1166	defense-finder-models/Cas/Cas/CAS_Class1-Subtype-I-B	UserReplicon_CAS_Class1-Subtype-I-B_1	1	1	1	8	1	Cas__cas4_I_II_III_IV_V_VI_6	accessory	199	2.9e-45	151.4	1	0.95	11	199
Bacteria	HBY57578.1	GCA_003513845.1	Atribacterota	Cas__cas2_I_II_III_IV_V_VI_3	1332	defense-finder-models/Cas/Cas/CAS_Cluster	UserReplicon_CAS_Cluster_9	1	1	0.12	6	1	Cas__cas2_I_II_III_IV_V_VI_1	mandatory	96	1.6e-24	82.7	0.975	0.812	3	80
Bacteria	HBY57579.1	GCA_003513845.1	Atribacterota	Cas__cas1_I_II_III_IV_V_VI_1	1333	defense-finder-models/Cas/Cas/CAS_Cluster	UserReplicon_CAS_Cluster_9	1	1	0.12	6	1	Cas__cas1_I_II_III_IV_V_VI_1	mandatory	328	1e-87	291	0.994	0.976	1	320
Bacteria	HBY57580.1	GCA_003513845.1	Atribacterota	Cas__cas6_I_II_III_IV_V_VI_12	1334	defense-finder-models/Cas/Cas/CAS_Cluster	UserReplicon_CAS_Cluster_9	1	1	0.12	6	1	Cas__cas6_I_II_III_IV_V_VI_7	mandatory	225	4.4e-83	274.9	0.995	0.964	1	217
Bacteria	HBY57581.1	GCA_003513845.1	Atribacterota	Cas__cas5_I_9	1335	defense-finder-models/Cas/Cas/CAS_Cluster	UserReplicon_CAS_Cluster_9	1	1	0.12	6	1	Cas__cas5_I-A_1	mandatory	241	2.7e-10	37.1	0.667	0.552	14	146
Bacteria	HBY57582.1	GCA_003513845.1	Atribacterota	Cas__cas7_I_15	1336	defense-finder-models/Cas/Cas/CAS_Cluster	UserReplicon_CAS_Cluster_9	1	1	0.12	6	1	Cas__cas7_I_15	mandatory	322	6.9e-51	169.6	0.985	0.854	10	284
Bacteria	HBY57583.1	GCA_003513845.1	Atribacterota	Cas__csa5gr11_III-B_2	1337	defense-finder-models/Cas/Cas/CAS_Cluster	UserReplicon_CAS_Cluster_9	1	1	0.12	6	1	Cas__csa5gr11_III-B_1	mandatory	478	2.8e-62	205.5	0.956	0.266	343	469
Bacteria	HBY57585.1	GCA_003513845.1	Atribacterota	Cas__cas3_I_5	1339	defense-finder-models/Cas/Cas/CAS_Cluster	UserReplicon_CAS_Cluster_9	1	1	0.12	6	1	Cas__cas3_I_5	neutral	559	2.1e-73	244.7	0.499	0.649	19	381
Bacteria	HBY57711.1	GCA_003513845.1	Atribacterota	RM_Type_IIG__Type_IIG	1465	defense-finder-models/RM/RM/RM_Type_IIG	UserReplicon_RM_Type_IIG_3	1	1	1	1	1	RM_Type_IIG__Type_IIG	mandatory	1245	4.6e-153	508.6	0.974	0.958	37	1229
Bacteria	HBY57712.1	GCA_003513845.1	Atribacterota	AVAST_IV__Avs4A	1466	defense-finder-models/DefenseFinder_2/AVAST/AVAST_IV	UserReplicon_AVAST_IV_1	1	1	1	1	1	AVAST_IV__Avs4A	mandatory	1582	0	1540	0.998	0.996	7	1582
Bacteria	HCU21763.1	GCA_003542295.1	Atribacterota	CBASS__Cyclase_II	476	defense-finder-models/DefenseFinder_5/CBASS/CBASS_II	UserReplicon_CBASS_II_4	1	1	1	3	1	CBASS__Cyclase_SMODS	mandatory	342	8.3e-109	360.6	0.985	0.997	1	341
Bacteria	HCU21764.1	GCA_003542295.1	Atribacterota	CBASS__AG_E1_ThiF	477	defense-finder-models/DefenseFinder_5/CBASS/CBASS_II	UserReplicon_CBASS_II_4	1	1	1	3	1	CBASS__E2	mandatory	604	1.8e-22	76.9	0.656	0.29	326	500
Bacteria	HCU21765.1	GCA_003542295.1	Atribacterota	CBASS__Jab	478	defense-finder-models/DefenseFinder_5/CBASS/CBASS_II	UserReplicon_CBASS_II_4	1	1	1	3	1	CBASS__E2	mandatory	169	2.6e-52	174.2	0.73	0.911	9	162
Bacteria	HCU21766.1	GCA_003542295.1	Atribacterota	CBASS__Sensing_SAVED	479	defense-finder-models/DefenseFinder_5/CBASS/CBASS_II	UserReplicon_CBASS_II_4	1	1	1	3	1	CBASS__Effector_2TM_S_2TMBeta	mandatory	368	7.2e-37	124	0.905	0.478	193	368
Bacteria	HCU22356.1	GCA_003542295.1	Atribacterota	Borvo__BovA	1069	defense-finder-models/DefenseFinder_5/Borvo/Borvo	UserReplicon_Borvo_1	1	1	1	1	1	Borvo__BovA	mandatory	182	0.00088	14.7	0.151	0.654	13	131
Bacteria	HCU22424.1	GCA_003542295.1	Atribacterota	RM_Type_IV__Type_IV_REases	1137	defense-finder-models/RM/RM/RM_Type_IV	UserReplicon_RM_Type_IV_2	1	1	1	1	1	RM_Type_IV__Type_IV_REases	mandatory	305	4.6e-58	194	0.442	0.623	113	302
Bacteria	HCU22672.1	GCA_003542295.1	Atribacterota	RM_Type_II__Type_II_REases	1385	defense-finder-models/RM/RM/RM_Type_II	UserReplicon_RM_Type_II_1	1	1	1	2	1	RM_Type_II__Type_II_REases	mandatory	502	2.1e-56	189.3	1.225	0.966	4	488
Bacteria	HCU22673.1	GCA_003542295.1	Atribacterota	RM_Type_II__Type_II_MTases	1386	defense-finder-models/RM/RM/RM_Type_II	UserReplicon_RM_Type_II_1	1	1	1	2	1	RM_Type_II__Type_II_MTases	mandatory	216	7.7e-10	34.8	0.257	0.472	5	106
Bacteria	MBP8717524.1	GCA_018054125.1	Atribacterota	AbiD__AbiD	64	defense-finder-models/DefenseFinder_1/AbiD/AbiD	UserReplicon_AbiD_1	1	1	1	1	1	AbiD__AbiD	mandatory	292	1.1e-84	281	0.926	0.979	1	286
Bacteria	MBP8717850.1	GCA_018054125.1	Atribacterota	SoFic__SoFic	390	defense-finder-models/DefenseFinder_5/SoFIC/SoFic	UserReplicon_SoFic_1	1	1	1	1	1	SoFic__SoFic	mandatory	375	9.3e-116	383.4	0.986	0.971	11	374
Bacteria	MBP8718124.1	GCA_018054125.1	Atribacterota	RM_Type_IIG__Type_IIG	664	defense-finder-models/RM/RM/RM_Type_IIG	UserReplicon_RM_Type_IIG_1	1	1	1	1	1	RM_Type_IIG__Type_IIG	mandatory	1042	8.7e-223	739.3	1.2	0.972	23	1035
Bacteria	MBP8718298.1	GCA_018054125.1	Atribacterota	AbiEii__AbiEi_4	838	defense-finder-models/DefenseFinder_1/AbiE/AbiE	UserReplicon_AbiE_2	1	1	1	2	1	AbiEii__AbiEi_1	mandatory	89	2.8e-08	30.4	0.959	0.562	9	58
Bacteria	MBP8718299.1	GCA_018054125.1	Atribacterota	AbiEii__AbiEii	839	defense-finder-models/DefenseFinder_1/AbiE/AbiE	UserReplicon_AbiE_2	1	1	1	2	1	AbiEii__AbiEii	mandatory	240	1.3e-19	67.6	0.895	0.95	10	237
Bacteria	MBU1290645.1	GCA_018819665.1	Atribacterota	SoFic__SoFic	469	defense-finder-models/DefenseFinder_5/SoFIC/SoFic	UserReplicon_SoFic_1	1	1	1	1	1	SoFic__SoFic	mandatory	382	2.9e-109	362.2	0.983	0.948	19	380
Bacteria	MBU1290979.1	GCA_018819665.1	Atribacterota	AbiEii__AbiEii	803	defense-finder-models/DefenseFinder_1/AbiE/AbiE	UserReplicon_AbiE_1	1	1	1	2	1	AbiEii__AbiEii	mandatory	70	4e-13	46.5	0.138	0.471	38	70
Bacteria	MBU1290980.1	GCA_018819665.1	Atribacterota	AbiEii__AbiEi_1	804	defense-finder-models/DefenseFinder_1/AbiE/AbiE	UserReplicon_AbiE_1	1	1	1	2	1	AbiEii__AbiEi_1	mandatory	277	1.8e-07	28.1	0.901	0.469	94	223
Bacteria	MBU1290988.1	GCA_018819665.1	Atribacterota	RM_Type_IIG__Type_IIG	812	defense-finder-models/RM/RM/RM_Type_IIG	UserReplicon_RM_Type_IIG_1	1	1	1	1	1	RM_Type_IIG__Type_IIG	mandatory	672	9.1e-163	540.6	0.782	0.972	18	670
Bacteria	MBU1291045.1	GCA_018819665.1	Atribacterota	AbiEii__AbiEii	869	defense-finder-models/DefenseFinder_1/AbiE/AbiE	UserReplicon_AbiE_2	1	1	1	2	1	AbiEii__AbiEii	mandatory	287	1.2e-35	120.3	0.975	0.847	31	273
Bacteria	MBU1291046.1	GCA_018819665.1	Atribacterota	AbiEii__AbiEi_4	870	defense-finder-models/DefenseFinder_1/AbiE/AbiE	UserReplicon_AbiE_2	1	1	1	2	1	AbiEii__AbiEi_1	mandatory	280	2e-08	30.9	0.939	0.193	17	70
Bacteria	MBU1291443.1	GCA_018819665.1	Atribacterota	RM_Type_IIG__Type_IIG	1267	defense-finder-models/RM/RM/RM_Type_IIG	UserReplicon_RM_Type_IIG_2	1	1	1	1	1	RM_Type_IIG__Type_IIG	mandatory	973	4.4e-207	687.4	1.119	0.978	22	973
Bacteria	NLJ48376.1	GCA_012517635.1	Atribacterota	SoFic__SoFic	413	defense-finder-models/DefenseFinder_5/SoFIC/SoFic	UserReplicon_SoFic_2	1	1	1	1	1	SoFic__SoFic	mandatory	380	2.6e-119	395.8	0.983	0.945	20	378
Bacteria	NLJ48389.1	GCA_012517635.1	Atribacterota	Borvo__BovA	426	defense-finder-models/DefenseFinder_5/Borvo/Borvo	UserReplicon_Borvo_1	1	1	1	1	1	Borvo__BovA	mandatory	181	0.00014	17.6	0.153	0.663	12	131
Bacteria	NLJ48586.1	GCA_012517635.1	Atribacterota	Cas__cmr1gr7_III-B_III-C_3	623	defense-finder-models/Cas/Cas/CAS_Class1-Subtype-III-C	UserReplicon_CAS_Class1-Subtype-III-C_4	1	1	1	6	1	Cas__cmr1gr7_III-B_III-C_3	accessory	279	6.3e-21	72.5	0.682	0.609	4	173
Bacteria	NLJ48587.1	GCA_012517635.1	Atribacterota	Cas__cmr6gr7_III-C_1	624	defense-finder-models/Cas/Cas/CAS_Class1-Subtype-III-C	UserReplicon_CAS_Class1-Subtype-III-C_4	1	1	1	6	1	Cas__cmr6gr7_III-C_1	mandatory	303	3.1e-31	106.1	0.44	0.363	164	273
Bacteria	NLJ48588.1	GCA_012517635.1	Atribacterota	Cas__cas10_III-C_3	625	defense-finder-models/Cas/Cas/CAS_Class1-Subtype-III-C	UserReplicon_CAS_Class1-Subtype-III-C_4	1	1	1	6	1	Cas__cas10_III-C_3	mandatory	960	8e-245	812.4	0.997	0.992	3	954
Bacteria	NLJ48589.1	GCA_012517635.1	Atribacterota	Cas__cmr4gr7_III-B_III-C_2	626	defense-finder-models/Cas/Cas/CAS_Class1-Subtype-III-C	UserReplicon_CAS_Class1-Subtype-III-C_4	1	1	1	6	1	Cas__cmr4gr7_III-B_III-C_2	accessory	290	3.5e-54	181.5	0.987	0.928	15	283
Bacteria	NLJ48590.1	GCA_012517635.1	Atribacterota	Cas__cmr5gr11_III-C_11	627	defense-finder-models/Cas/Cas/CAS_Class1-Subtype-III-C	UserReplicon_CAS_Class1-Subtype-III-C_4	1	1	1	6	1	Cas__cmr5gr11_III-C_11	accessory	126	1.4e-33	113.2	0.898	0.913	2	116
Bacteria	NLJ48591.1	GCA_012517635.1	Atribacterota	Cas__cmr3gr5_III-C_1	628	defense-finder-models/Cas/Cas/CAS_Class1-Subtype-III-C	UserReplicon_CAS_Class1-Subtype-III-C_4	1	1	1	6	1	Cas__cmr3gr5_III-C_1	mandatory	301	3.1e-74	247	0.986	0.98	1	295
Bacteria	NLJ49420.1	GCA_012517635.1	Atribacterota	RM__Type_I_REases	1457	defense-finder-models/RM/RM/RM_Type_I	UserReplicon_RM_Type_I_1	1	1	1	2.5	1	RM__Type_I_REases	mandatory	971	5.2e-145	482.3	0.973	0.952	16	939
Bacteria	NLJ49421.1	GCA_012517635.1	Atribacterota	RM__Type_I_S	1458	defense-finder-models/RM/RM/RM_Type_I	UserReplicon_RM_Type_I_1	1	1	1	2.5	1	RM__Type_I_S	accessory	277	6.1e-56	186.9	0.398	0.986	1	273
Bacteria	NLJ49422.1	GCA_012517635.1	Atribacterota	RM__Type_I_MTases	1459	defense-finder-models/RM/RM/RM_Type_I	UserReplicon_RM_Type_I_1	1	1	1	2.5	1	RM__Type_I_MTases	mandatory	509	3.8e-139	462.1	0.984	0.982	9	508
Bacteria	NLJ49552.1	GCA_012517635.1	Atribacterota	RM_Type_IV__Type_IV_REases	1589	defense-finder-models/RM/RM/RM_Type_IV	UserReplicon_RM_Type_IV_3	1	1	1	1	1	RM_Type_IV__Type_IV_REases	mandatory	282	1.1e-44	150.2	0.342	0.528	131	279
Bacteria	NLJ49783.1	GCA_012517635.1	Atribacterota	RM_Type_II__Type_II_REases	1820	defense-finder-models/RM/RM/RM_Type_II	UserReplicon_RM_Type_II_2	1	1	1	2	1	RM_Type_II__Type_II_REases	mandatory	301	7.7e-67	222.7	1.042	0.927	20	298
Bacteria	NLJ49784.1	GCA_012517635.1	Atribacterota	RM_Type_II__Type_II_MTases	1821	defense-finder-models/RM/RM/RM_Type_II	UserReplicon_RM_Type_II_2	1	1	1	2	1	RM_Type_II__Type_II_MTases	mandatory	280	1.2e-93	310.7	0.672	0.896	25	275
Bacteria	NLJ50085.1	GCA_012517635.1	Atribacterota	Cas__cas6_I_II_III_IV_V_VI_14	2122	defense-finder-models/Cas/Cas/CAS_Class1-Subtype-I-B	UserReplicon_CAS_Class1-Subtype-I-B_1	1	1	0.625	5	1	Cas__cas6_I-B_III_1	accessory	208	3.7e-42	142.1	0.787	0.938	12	206
Bacteria	NLJ50086.1	GCA_012517635.1	Atribacterota	Cas__cas8b1_I-B_14	2123	defense-finder-models/Cas/Cas/CAS_Class1-Subtype-I-B	UserReplicon_CAS_Class1-Subtype-I-B_1	1	1	0.625	5	1	Cas__cas8b2_I-B_2	mandatory	588	2.9e-136	452.7	0.998	0.969	1	570
Bacteria	NLJ50087.1	GCA_012517635.1	Atribacterota	Cas__cas7_I-B_8	2124	defense-finder-models/Cas/Cas/CAS_Class1-Subtype-I-B	UserReplicon_CAS_Class1-Subtype-I-B_1	1	1	0.625	5	1	Cas__cas7_I-B_6	mandatory	305	6.7e-84	278.8	0.997	0.905	8	283
Bacteria	NLJ50088.1	GCA_012517635.1	Atribacterota	Cas__cas5_I-B_17	2125	defense-finder-models/Cas/Cas/CAS_Class1-Subtype-I-B	UserReplicon_CAS_Class1-Subtype-I-B_1	1	1	0.625	5	1	Cas__cas5_I-B_6	mandatory	249	7e-40	134.4	0.926	0.924	1	230
Bacteria	NLJ50089.1	GCA_012517635.1	Atribacterota	Cas__cas3HD_I_1	2126	defense-finder-models/Cas/Cas/CAS_Class1-Subtype-I-B	UserReplicon_CAS_Class1-Subtype-I-B_1	1	1	0.625	5	1	Cas__cas3_I_5	accessory	328	6.1e-34	114.8	0.956	0.61	7	206
Bacteria	NLJ50193.1	GCA_012517635.1	Atribacterota	Cas__csx1_III_9	2230	defense-finder-models/Cas/Cas/CAS_Class1-Subtype-III-A	UserReplicon_CAS_Class1-Subtype-III-A_3	1	1	0.556	5	1	Cas__csx1_III_10	accessory	351	1.3e-57	192.9	0.987	0.886	2	312
Bacteria	NLJ50194.1	GCA_012517635.1	Atribacterota	Cas__csm5gr7_III-A_2	2231	defense-finder-models/Cas/Cas/CAS_Class1-Subtype-III-A	UserReplicon_CAS_Class1-Subtype-III-A_3	1	1	0.556	5	1	Cas__csm5gr7_III-A_2	mandatory	377	5.2e-33	112	0.964	0.926	4	352
Bacteria	NLJ50195.1	GCA_012517635.1	Atribacterota	Cas__csm4gr5_III-A_1	2232	defense-finder-models/Cas/Cas/CAS_Class1-Subtype-III-A	UserReplicon_CAS_Class1-Subtype-III-A_3	1	1	0.556	5	1	Cas__csm4gr5_III-A_3	mandatory	344	5.3e-30	102	0.947	0.887	28	332
Bacteria	NLJ50196.1	GCA_012517635.1	Atribacterota	Cas__csm3gr7_III-A_1	2233	defense-finder-models/Cas/Cas/CAS_Class1-Subtype-III-A	UserReplicon_CAS_Class1-Subtype-III-A_3	1	1	0.556	5	1	Cas__csm3gr7_III-A_1	mandatory	252	4.7e-64	213.3	0.986	0.849	7	220
Bacteria	NLJ50197.1	GCA_012517635.1	Atribacterota	Cas__csm2gr11_III-A_13	2234	defense-finder-models/Cas/Cas/CAS_Class1-Subtype-III-A	UserReplicon_CAS_Class1-Subtype-III-A_3	1	1	0.556	5	1	Cas__csm2gr11_III-A_15	mandatory	159	2.8e-18	63.3	0.758	0.648	56	158
Bacteria	OQA54817.1	GCA_002069605.1	Atribacterota	RM_Type_II__Type_II_MTases	406	defense-finder-models/RM/RM/RM_Type_II	UserReplicon_RM_Type_II_1	1	1	1	2	2	RM_Type_II__Type_II_MTases	mandatory	262	1.8e-68	228.4	0.672	0.905	7	243
Bacteria	OQA54818.1	GCA_002069605.1	Atribacterota	RM_Type_II__Type_II_REases	407	defense-finder-models/RM/RM/RM_Type_II	UserReplicon_RM_Type_II_1	1	1	1	2	2	RM_Type_II__Type_II_REases	mandatory	313	7.5e-66	219.3	1.038	0.914	19	304
Bacteria	OQA54819.1	GCA_002069605.1	Atribacterota	RM_Type_II__Type_II_MTases	408	defense-finder-models/RM/RM/RM_Type_II	UserReplicon_RM_Type_II_1	1	1	1	2	2	RM_Type_II__Type_II_MTases	mandatory	226	7.9e-63	209.3	0.544	0.956	6	221
Bacteria	OQA54854.1	GCA_002069605.1	Atribacterota	Borvo__BovA	421	defense-finder-models/DefenseFinder_5/Borvo/Borvo	UserReplicon_Borvo_1	1	1	1	1	1	Borvo__BovA	mandatory	181	0.00063	15.3	0.15	0.652	13	130
Bacteria	OQA56371.1	GCA_002069605.1	Atribacterota	Thoeris_I__ThsA_new_grand	767	defense-finder-models/DefenseFinder_3/Thoeris/Thoeris_I	UserReplicon_Thoeris_I_1	1	1	1	2	1	Thoeris_I__ThsA_new_grand	mandatory	471	2.7e-164	544.2	0.987	0.983	5	467
Bacteria	OQA56372.1	GCA_002069605.1	Atribacterota	Thoeris__ThsB_Global	768	defense-finder-models/DefenseFinder_3/Thoeris/Thoeris_I	UserReplicon_Thoeris_I_1	1	1	1	2	1	Thoeris__ThsB_Global	mandatory	165	7.3e-37	124.1	0.746	0.964	3	161
Bacteria	OQA61467.1	GCA_002069605.1	Atribacterota	ShosTA__ShosT	2147	defense-finder-models/DefenseFinder_2/ShosTA/ShosTA	UserReplicon_ShosTA_1	1	1	1	2	1	ShosTA__ShosT	mandatory	209	4.8e-19	66	0.65	0.823	36	207
Bacteria	OQA61468.1	GCA_002069605.1	Atribacterota	ShosTA__ShosA	2148	defense-finder-models/DefenseFinder_2/ShosTA/ShosTA	UserReplicon_ShosTA_1	1	1	1	2	1	ShosTA__ShosA	mandatory	272	3.2e-64	214	0.64	0.706	75	266
Bacteria	PIX33575.1	GCA_002782675.1	Atribacterota	RM_Type_II__Type_II_MTases	235	defense-finder-models/RM/RM/RM_Type_II	UserReplicon_RM_Type_II_3	1	1	1	2	2	RM_Type_II__Type_II_MTases	mandatory	257	3.7e-84	278.9	0.658	0.984	2	254
Bacteria	PIX33576.1	GCA_002782675.1	Atribacterota	RM_Type_II__Type_II_REases	236	defense-finder-models/RM/RM/RM_Type_II	UserReplicon_RM_Type_II_3	1	1	1	2	2	RM_Type_II__Type_II_REases	mandatory	605	7.9e-12	41.2	1.252	0.575	250	597
Bacteria	PIX33577.1	GCA_002782675.1	Atribacterota	RM_Type_II__Type_II_MTases	237	defense-finder-models/RM/RM/RM_Type_II	UserReplicon_RM_Type_II_3	1	1	1	2	2	RM_Type_II__Type_II_MTases	mandatory	403	8.8e-100	331.5	0.934	0.841	64	402
Bacteria	PIX33775.1	GCA_002782675.1	Atribacterota	AbiJ__AbiJ	391	defense-finder-models/DefenseFinder_1/AbiJ/AbiJ	UserReplicon_AbiJ_2	1	1	1	1	1	AbiJ__AbiJ	mandatory	269	1.7e-25	86.6	0.573	0.636	89	259
Bacteria	PIX33776.1	GCA_002782675.1	Atribacterota	RM__Type_I_MTases	392	defense-finder-models/RM/RM/RM_Type_I	UserReplicon_RM_Type_I_1	1	1	1	2.5	1	RM__Type_I_MTases	mandatory	487	5.4e-197	652	0.957	0.998	1	486
Bacteria	PIX33778.1	GCA_002782675.1	Atribacterota	RM__Type_I_S	394	defense-finder-models/RM/RM/RM_Type_I	UserReplicon_RM_Type_I_1	1	1	1	2.5	1	RM__Type_I_S	accessory	432	8.6e-80	265.7	0.568	0.97	6	424
Bacteria	PIX33779.1	GCA_002782675.1	Atribacterota	RM__Type_I_REases	395	defense-finder-models/RM/RM/RM_Type_I	UserReplicon_RM_Type_I_1	1	1	1	2.5	1	RM__Type_I_REases	mandatory	925	2.8e-189	627.9	0.849	0.987	10	922
Bacteria	PIX34233.1	GCA_002782675.1	Atribacterota	AbiEii__AbiEi_1	704	defense-finder-models/DefenseFinder_1/AbiE/AbiE	UserReplicon_AbiE_1	1	1	1	2	1	AbiEii__AbiEi_1	mandatory	266	3.4e-09	33.6	0.915	0.5	89	221
Bacteria	PIX34234.1	GCA_002782675.1	Atribacterota	AbiEii__AbiEii	705	defense-finder-models/DefenseFinder_1/AbiE/AbiE	UserReplicon_AbiE_1	1	1	1	2	1	AbiEii__AbiEii	mandatory	141	8.8e-11	38.8	0.356	0.603	16	100
Bacteria	PIX34588.1	GCA_002782675.1	Atribacterota	RM__Type_I_MTases	955	defense-finder-models/RM/RM/RM_Type_I	UserReplicon_RM_Type_I_2	1	1	1	2.5	1	RM__Type_I_MTases	mandatory	510	1.9e-157	521.8	0.984	0.98	3	502
Bacteria	PIX34589.1	GCA_002782675.1	Atribacterota	RM__Type_I_S	956	defense-finder-models/RM/RM/RM_Type_I	UserReplicon_RM_Type_I_2	1	1	1	2.5	1	RM__Type_I_S	accessory	421	6.8e-73	242.2	0.585	0.96	12	415
Bacteria	PIX34590.1	GCA_002782675.1	Atribacterota	RM__Type_I_REases	957	defense-finder-models/RM/RM/RM_Type_I	UserReplicon_RM_Type_I_2	1	1	1	2.5	1	RM__Type_I_REases	mandatory	974	5.5e-148	491.5	0.987	0.982	6	961
Bacteria	PIX34791.1	GCA_002782675.1	Atribacterota	Cas__cas6_I-B_III_1	1110	defense-finder-models/Cas/Cas/CAS_Class1-Subtype-I-B	UserReplicon_CAS_Class1-Subtype-I-B_1	1	1	1	8	1	Cas__cas6_I-B_III_1	accessory	238	1.2e-67	224.3	0.974	0.954	3	229
Bacteria	PIX34792.1	GCA_002782675.1	Atribacterota	Cas__cas8b1_I-B_11	1111	defense-finder-models/Cas/Cas/CAS_Class1-Subtype-I-B	UserReplicon_CAS_Class1-Subtype-I-B_1	1	1	1	8	1	Cas__cas8b2_I-B_2	mandatory	564	7.2e-178	589.2	0.993	0.989	6	563
Bacteria	PIX34793.1	GCA_002782675.1	Atribacterota	Cas__cas7_I-B_6	1112	defense-finder-models/Cas/Cas/CAS_Class1-Subtype-I-B	UserReplicon_CAS_Class1-Subtype-I-B_1	1	1	1	8	1	Cas__cas7_I-B_6	mandatory	313	5.9e-50	166.7	0.957	0.933	9	300
Bacteria	PIX34794.1	GCA_002782675.1	Atribacterota	Cas__cas5_I-B_6	1113	defense-finder-models/Cas/Cas/CAS_Class1-Subtype-I-B	UserReplicon_CAS_Class1-Subtype-I-B_1	1	1	1	8	1	Cas__cas5_I-B_6	mandatory	236	2.2e-15	53.8	0.779	0.606	12	154
Bacteria	PIX34795.1	GCA_002782675.1	Atribacterota	Cas__cas3_I_2	1114	defense-finder-models/Cas/Cas/CAS_Class1-Subtype-I-B	UserReplicon_CAS_Class1-Subtype-I-B_1	1	1	1	8	1	Cas__cas3_I_5	accessory	741	1.2e-81	271	0.938	0.439	263	587
Bacteria	PIX34796.1	GCA_002782675.1	Atribacterota	Cas__cas4_I_II_III_IV_V_VI_6	1115	defense-finder-models/Cas/Cas/CAS_Class1-Subtype-I-B	UserReplicon_CAS_Class1-Subtype-I-B_1	1	1	1	8	1	Cas__cas4_I_II_III_IV_V_VI_6	accessory	168	1.5e-46	155	1	0.982	4	168
Bacteria	PIX34797.1	GCA_002782675.1	Atribacterota	Cas__cas1_I_II_III_IV_V_VI_7	1116	defense-finder-models/Cas/Cas/CAS_Class1-Subtype-I-B	UserReplicon_CAS_Class1-Subtype-I-B_1	1	1	1	8	1	Cas__cas1_I_II_III_IV_V_VI_7	accessory	334	3.5e-119	394.3	0.994	0.964	7	328
Bacteria	PIX34798.1	GCA_002782675.1	Atribacterota	Cas__cas2_I_II_III_IV_V_VI_3	1117	defense-finder-models/Cas/Cas/CAS_Class1-Subtype-I-B	UserReplicon_CAS_Class1-Subtype-I-B_1	1	1	1	8	1	Cas__cas2_I_II_III_IV_V_VI_3	accessory	91	1.2e-25	86.1	0.975	0.835	7	82
Bacteria	PIX35264.1	GCA_002782675.1	Atribacterota	RM_Type_III__Type_III_MTases	1471	defense-finder-models/RM/RM/RM_Type_III	UserReplicon_RM_Type_III_5	1	1	1	2	1	RM_Type_III__Type_III_MTases	mandatory	677	4e-79	263.8	0.739	0.666	2	452
Bacteria	PIX35266.1	GCA_002782675.1	Atribacterota	RM_Type_III__Type_III_REases	1473	defense-finder-models/RM/RM/RM_Type_III	UserReplicon_RM_Type_III_5	1	1	1	2	1	RM_Type_III__Type_III_REases	mandatory	849	2.3e-24	82.1	0.379	0.463	108	500
Bacteria	PIX35321.1	GCA_002782675.1	Atribacterota	RM_Type_II__Type_II_MTases	1520	defense-finder-models/RM/RM/RM_Type_II	UserReplicon_RM_Type_II_4	1	1	1	2	2	RM_Type_II__Type_II_MTases	mandatory	603	6.3e-119	393.5	0.888	0.547	272	601
Bacteria	PIX35322.1	GCA_002782675.1	Atribacterota	RM_Type_II__Type_II_MTases	1521	defense-finder-models/RM/RM/RM_Type_II	UserReplicon_RM_Type_II_4	1	1	1	2	2	RM_Type_II__Type_II_MTases	mandatory	302	1.9e-68	227.9	0.822	0.987	5	302
Bacteria	PIX35323.1	GCA_002782675.1	Atribacterota	RM_Type_II__Type_II_REases	1522	defense-finder-models/RM/RM/RM_Type_II	UserReplicon_RM_Type_II_4	1	1	1	2	2	RM_Type_II__Type_II_REases	mandatory	505	3.6e-78	260.3	1.889	0.899	2	455
Bacteria	RJP55913.1	GCA_003599815.1	Aureabacteria	RM_Type_IV__Type_IV_REases	43	defense-finder-models/RM/RM/RM_Type_IV	UserReplicon_RM_Type_IV_2	1	1	1	1	1	RM_Type_IV__Type_IV_REases	mandatory	281	2.2e-38	129.5	0.337	0.523	132	278
Bacteria	RJP56164.1	GCA_003599815.1	Aureabacteria	RM_Type_II__Type_II_REases	141	defense-finder-models/RM/RM/RM_Type_II	UserReplicon_RM_Type_II_1	1	1	1	2	1	RM_Type_II__Type_II_REases	mandatory	197	1.5e-16	58.6	0.817	0.797	13	169
Bacteria	RJP56165.1	GCA_003599815.1	Aureabacteria	RM_Type_II__Type_II_MTases	142	defense-finder-models/RM/RM/RM_Type_II	UserReplicon_RM_Type_II_1	1	1	1	2	1	RM_Type_II__Type_II_MTases	mandatory	224	5.9e-78	258.3	0.514	0.839	5	192
Bacteria	RJP56748.1	GCA_003599815.1	Aureabacteria	Cas__cas12f1_V-F_2	378	defense-finder-models/Cas/Cas/CAS_Class2-Subtype-V-F	UserReplicon_CAS_Class2-Subtype-V-F_1	1	1	1	4	1	Cas__cas12f1_V-F_3	mandatory	603	2.2e-155	515.7	0.987	0.987	2	596
Bacteria	RJP56749.1	GCA_003599815.1	Aureabacteria	Cas__cas4_I_II_III_IV_V_VI_1	379	defense-finder-models/Cas/Cas/CAS_Class2-Subtype-V-F	UserReplicon_CAS_Class2-Subtype-V-F_1	1	1	1	4	1	Cas__cas4_I_II_III_IV_V_VI_1	accessory	189	2e-21	74.2	0.989	0.952	7	186
Bacteria	RJP56750.1	GCA_003599815.1	Aureabacteria	Cas__cas2_I_II_III_IV_V_VI_3	380	defense-finder-models/Cas/Cas/CAS_Class2-Subtype-V-F	UserReplicon_CAS_Class2-Subtype-V-F_1	1	1	1	4	1	Cas__cas2_I_II_III_IV_V_VI_1	accessory	100	1.2e-19	67.6	0.975	0.79	3	81
Bacteria	RJP56751.1	GCA_003599815.1	Aureabacteria	Cas__cas1_I_II_III_IV_V_VI_1	381	defense-finder-models/Cas/Cas/CAS_Class2-Subtype-V-F	UserReplicon_CAS_Class2-Subtype-V-F_1	1	1	1	4	1	Cas__cas1_I_II_III_IV_V_VI_1	accessory	326	4.1e-77	256.6	0.997	0.963	1	314
Bacteria	RJP58257.1	GCA_003599815.1	Aureabacteria	Gabija__GajA	1012	defense-finder-models/DefenseFinder_1/Gabija/Gabija	UserReplicon_Gabija_2	1	1	1	2	1	Gabija__GajA	mandatory	718	6e-98	326.4	0.989	0.961	1	690
Bacteria	RJP58258.1	GCA_003599815.1	Aureabacteria	Gabija__GajB_1	1013	defense-finder-models/DefenseFinder_1/Gabija/Gabija	UserReplicon_Gabija_2	1	1	1	2	1	Gabija__GajB_1	mandatory	579	1.6e-116	387.2	0.977	0.971	16	577
Bacteria	RJP60169.1	GCA_003599815.1	Aureabacteria	AbiD__AbiD	1752	defense-finder-models/DefenseFinder_1/AbiD/AbiD	UserReplicon_AbiD_1	1	1	1	1	1	AbiD__AbiD	mandatory	299	3.7e-84	280.1	0.923	0.973	1	291
Bacteria	QPQ50559.1	GCA_016025055.1	Bacteroidota	Gao_Iet__IetA	430	defense-finder-models/DefenseFinder_1/Gao_Iet/Gao_Iet	UserReplicon_Gao_Iet_2	1	1	1	2	1	Gao_Iet__IetA	mandatory	341	3.4e-42	142.6	0.602	0.698	93	330
Bacteria	QPQ50560.1	GCA_016025055.1	Bacteroidota	Gao_Iet__IetS	431	defense-finder-models/DefenseFinder_1/Gao_Iet/Gao_Iet	UserReplicon_Gao_Iet_2	1	1	1	2	1	Gao_Iet__IetS	mandatory	643	2.8e-22	76.3	0.519	0.663	85	510
Bacteria	QPQ50675.1	GCA_016025055.1	Bacteroidota	RM_Type_III__Type_III_MTases	546	defense-finder-models/RM/RM/RM_Type_III	UserReplicon_RM_Type_III_2	1	1	1	2	1	RM_Type_III__Type_III_MTases	mandatory	629	1.7e-109	365.4	0.748	0.765	82	562
Bacteria	QPQ50676.1	GCA_016025055.1	Bacteroidota	RM_Type_III__Type_III_REases	547	defense-finder-models/RM/RM/RM_Type_III	UserReplicon_RM_Type_III_2	1	1	1	2	1	RM_Type_III__Type_III_REases	mandatory	850	1.6e-48	163.3	0.437	0.525	40	485
Bacteria	QPQ51207.1	GCA_016025055.1	Bacteroidota	Gao_Iet__IetS	1078	defense-finder-models/DefenseFinder_1/Gao_Iet/Gao_Iet	UserReplicon_Gao_Iet_3	1	1	1	2	1	Gao_Iet__IetS	mandatory	787	3.8e-44	148.6	0.679	0.635	135	634
Bacteria	QPQ51208.1	GCA_016025055.1	Bacteroidota	Gao_Iet__IetA	1079	defense-finder-models/DefenseFinder_1/Gao_Iet/Gao_Iet	UserReplicon_Gao_Iet_3	1	1	1	2	1	Gao_Iet__IetA	mandatory	364	7.8e-87	289.5	0.951	0.986	3	361
Bacteria	QPQ51225.1	GCA_016025055.1	Bacteroidota	AbiZ__AbiZ	1096	defense-finder-models/DefenseFinder_1/AbiZ/AbiZ	UserReplicon_AbiZ_1	1	1	1	1	1	AbiZ__AbiZ	mandatory	116	6.7e-06	23.3	0.194	0.724	33	116
Bacteria	QPQ51669.1	GCA_016025055.1	Bacteroidota	Cas__cas2_I_II_III_IV_V_VI_6	1540	defense-finder-models/Cas/Cas/CAS_Class2-Subtype-II-C	UserReplicon_CAS_Class2-Subtype-II-C_1	1	1	1	3	1	Cas__cas2_I_II_III_IV_V_VI_6	accessory	112	1.2e-25	87.8	0.776	0.804	9	98
Bacteria	QPQ51670.1	GCA_016025055.1	Bacteroidota	Cas__cas1_I_II_III_IV_V_VI_5	1541	defense-finder-models/Cas/Cas/CAS_Class2-Subtype-II-C	UserReplicon_CAS_Class2-Subtype-II-C_1	1	1	1	3	1	Cas__cas1_I_II_III_IV_V_VI_5	accessory	297	4.9e-82	273	0.993	0.929	4	279
Bacteria	QPQ51671.1	GCA_016025055.1	Bacteroidota	Cas__cas9_II-A_II-B_II-C_1	1542	defense-finder-models/Cas/Cas/CAS_Class2-Subtype-II-C	UserReplicon_CAS_Class2-Subtype-II-C_1	1	1	1	3	1	Cas__cas9_II-A_II-B_II-C_1	mandatory	1269	6.5e-67	224.4	0.983	0.686	5	874
Bacteria	QPQ51899.1	GCA_016025055.1	Bacteroidota	RloC__RloC	1770	defense-finder-models/DefenseFinder_1/RloC/RloC	UserReplicon_RloC_5	1	1	1	1	1	RloC__RloC	mandatory	745	7.3e-138	459.1	0.996	0.985	1	734
Bacteria	QPQ51937.1	GCA_016025055.1	Bacteroidota	RloC__RloC	1808	defense-finder-models/DefenseFinder_1/RloC/RloC	UserReplicon_RloC_6	1	1	1	1	1	RloC__RloC	mandatory	738	7.7e-72	240.8	0.911	0.974	6	724
Bacteria	QPQ51955.1	GCA_016025055.1	Bacteroidota	Kiwa__KwaA	1826	defense-finder-models/DefenseFinder_1/Kiwa/Kiwa	UserReplicon_Kiwa_4	1	1	1	2	1	Kiwa__KwaA	mandatory	159	1.8e-37	126.6	0.754	0.918	13	158
Bacteria	QPQ51956.1	GCA_016025055.1	Bacteroidota	Kiwa__KwaB	1827	defense-finder-models/DefenseFinder_1/Kiwa/Kiwa	UserReplicon_Kiwa_4	1	1	1	2	1	Kiwa__KwaB	mandatory	339	5.1e-66	221	0.987	0.982	1	333
Bacteria	QPQ52126.1	GCA_016025055.1	Bacteroidota	AVAST_IV__Avs4A	1997	defense-finder-models/DefenseFinder_2/AVAST/AVAST_IV	UserReplicon_AVAST_IV_1	1	1	1	1	1	AVAST_IV__Avs4A	mandatory	1324	1.8e-40	136	0.54	0.649	268	1126
Bacteria	QPQ52698.1	GCA_016025055.1	Bacteroidota	RM_Type_IV__Type_IV_REases	2569	defense-finder-models/RM/RM/RM_Type_IV	UserReplicon_RM_Type_IV_3	1	1	1	1	1	RM_Type_IV__Type_IV_REases	mandatory	312	2.9e-32	109.9	0.287	0.388	170	290
Bacteria	QPQ53729.1	GCA_016025055.1	Bacteroidota	RM__Type_I_REases	3600	defense-finder-models/RM/RM/RM_Type_I	UserReplicon_RM_Type_I_1	1	1	1	2.5	1	RM__Type_I_REases	mandatory	955	4e-204	678.6	0.937	0.951	1	908
Bacteria	QPQ53731.1	GCA_016025055.1	Bacteroidota	RM__Type_I_S	3602	defense-finder-models/RM/RM/RM_Type_I	UserReplicon_RM_Type_I_1	1	1	1	2.5	1	RM__Type_I_S	accessory	390	1.1e-52	176.9	0.552	0.977	8	388
Bacteria	QPQ53735.1	GCA_016025055.1	Bacteroidota	RM__Type_I_S	3606	defense-finder-models/RM/RM/RM_Type_I	UserReplicon_RM_Type_I_1	1	1	1	2.5	1	RM__Type_I_S	accessory	385	8.2e-46	154.1	0.549	0.987	4	383
Bacteria	QPQ53736.1	GCA_016025055.1	Bacteroidota	RM__Type_I_MTases	3607	defense-finder-models/RM/RM/RM_Type_I	UserReplicon_RM_Type_I_1	1	1	1	2.5	1	RM__Type_I_MTases	mandatory	516	1.7e-177	589.2	0.996	0.996	1	514
Bacteria	TLU50775.1	GCA_005843835.1	Bacteroidota	Cas__cas1_I-F_1	53	defense-finder-models/Cas/Cas/CAS_Class1-Subtype-I-F	UserReplicon_CAS_Class1-Subtype-I-F_1	1	1	1	6	1	Cas__cas1_I-F_1	mandatory	323	2.6e-148	490.1	0.997	0.944	12	316
Bacteria	TLU50776.1	GCA_005843835.1	Bacteroidota	Cas__cas3f_I-F_1	54	defense-finder-models/Cas/Cas/CAS_Class1-Subtype-I-F	UserReplicon_CAS_Class1-Subtype-I-F_1	1	1	1	6	1	Cas__cas3f_I-F_1	mandatory	1109	0	1271.3	0.999	0.995	1	1104
Bacteria	TLU50777.1	GCA_005843835.1	Bacteroidota	Cas__cas8f_I-F_4	55	defense-finder-models/Cas/Cas/CAS_Class1-Subtype-I-F	UserReplicon_CAS_Class1-Subtype-I-F_1	1	1	1	6	1	Cas__cas8f_I-F_8	mandatory	428	1.8e-127	422.5	1	0.857	47	413
Bacteria	TLU50778.1	GCA_005843835.1	Bacteroidota	Cas__cas5f_I-F_3	56	defense-finder-models/Cas/Cas/CAS_Class1-Subtype-I-F	UserReplicon_CAS_Class1-Subtype-I-F_1	1	1	1	6	1	Cas__cas5f_I-F_4	mandatory	328	3.7e-102	338.5	0.997	0.912	27	325
Bacteria	TLU50779.1	GCA_005843835.1	Bacteroidota	Cas__cas7f_I-F_2	57	defense-finder-models/Cas/Cas/CAS_Class1-Subtype-I-F	UserReplicon_CAS_Class1-Subtype-I-F_1	1	1	1	6	1	Cas__cas7f_I-F_3	mandatory	350	5.2e-137	453.4	1	0.969	8	346
Bacteria	TLU50780.1	GCA_005843835.1	Bacteroidota	Cas__cas6f_I_II_III_IV_V_VI_2	58	defense-finder-models/Cas/Cas/CAS_Class1-Subtype-I-F	UserReplicon_CAS_Class1-Subtype-I-F_1	1	1	1	6	1	Cas__cas6f_I_II_III_IV_V_VI_3	mandatory	186	1.7e-57	191.3	1	1	1	186
Bacteria	TLU50822.1	GCA_005843835.1	Bacteroidota	AbiD__AbiD	100	defense-finder-models/DefenseFinder_1/AbiD/AbiD	UserReplicon_AbiD_1	1	1	1	1	1	AbiD__AbiD	mandatory	199	1.2e-43	146.5	0.477	0.769	11	163
Bacteria	TLU51252.1	GCA_005843835.1	Bacteroidota	AbiEii__AbiEii	530	defense-finder-models/DefenseFinder_1/AbiE/AbiE	UserReplicon_AbiE_2	1	1	1	2	1	AbiEii__AbiEii	mandatory	291	4.4e-09	33.5	0.657	0.519	53	203
Bacteria	TLU51255.1	GCA_005843835.1	Bacteroidota	AbiEii__AbiEi_2	533	defense-finder-models/DefenseFinder_1/AbiE/AbiE	UserReplicon_AbiE_2	1	1	1	2	1	AbiEii__AbiEi_1	mandatory	329	1.5e-44	148.6	0.993	0.426	183	322
Bacteria	TLU51895.1	GCA_005843835.1	Bacteroidota	Lamassu-Fam__LmuB_SMC_Cap4_nuclease_II	1173	defense-finder-models/DefenseFinder_1/Lamassu-Fam/Lamassu-Fam	UserReplicon_Lamassu-Fam_3	1	1	0.667	2	1	Lamassu-Fam__LmuB_SMC_Cap4_nuclease_II	mandatory	813	1.2e-15	54.4	0.959	0.985	1	801
Bacteria	TLU51898.1	GCA_005843835.1	Bacteroidota	Lamassu-Fam__LmuA_effector_Hydrolase	1176	defense-finder-models/DefenseFinder_1/Lamassu-Fam/Lamassu-Fam	UserReplicon_Lamassu-Fam_3	1	1	0.667	2	1	Lamassu-Fam__LmuA_effector_Cap4_nuclease_II	mandatory	299	1.2e-06	24.5	0.151	0.211	77	139
Bacteria	WP_004295679.1	GCF_001314995.1	Bacteroidota	ShosTA__ShosT	100	defense-finder-models/DefenseFinder_2/ShosTA/ShosTA	UserReplicon_ShosTA_2	1	1	1	2	2	ShosTA__ShosT	mandatory	857	6.1e-13	47.1	0.747	0.189	691	852
Bacteria	WP_004295681.1	GCF_001314995.1	Bacteroidota	ShosTA__ShosT	102	defense-finder-models/DefenseFinder_2/ShosTA/ShosTA	UserReplicon_ShosTA_2	1	1	1	2	2	ShosTA__ShosT	mandatory	226	4.2e-14	50.9	0.646	0.695	24	180
Bacteria	WP_004295682.1	GCF_001314995.1	Bacteroidota	ShosTA__ShosA	103	defense-finder-models/DefenseFinder_2/ShosTA/ShosTA	UserReplicon_ShosTA_2	1	1	1	2	2	ShosTA__ShosA	mandatory	320	4.5e-63	211.2	0.878	0.894	5	290
Bacteria	WP_004295683.1	GCF_001314995.1	Bacteroidota	RM_Type_IIG__Type_IIG	104	defense-finder-models/RM/RM/RM_Type_IIG	UserReplicon_RM_Type_IIG_4	1	1	1	1	1	RM_Type_IIG__Type_IIG	mandatory	1651	0	1015	1.243	0.999	2	1650
Bacteria	WP_004296100.1	GCF_001314995.1	Bacteroidota	Hachiman__HamA_1	411	defense-finder-models/DefenseFinder_4/Hachiman/Hachiman	UserReplicon_Hachiman_1	1	1	1	2	1	Hachiman__HamA_1	mandatory	280	3.2e-23	80.7	0.669	0.732	69	273
Bacteria	WP_004296101.1	GCF_001314995.1	Bacteroidota	Hachiman__HamB	412	defense-finder-models/DefenseFinder_4/Hachiman/Hachiman	UserReplicon_Hachiman_1	1	1	1	2	1	Hachiman__HamB	mandatory	734	1.9e-97	325.7	0.85	0.92	23	697
Bacteria	WP_004298052.1	GCF_001314995.1	Bacteroidota	PsyrTA__PsyrT	1586	defense-finder-models/DefenseFinder_2/PsyrTA/PsyrTA	UserReplicon_PsyrTA_1	1	1	1	2	1	PsyrTA__PsyrT	mandatory	644	1.4e-21	74.4	0.556	0.604	29	417
Bacteria	WP_004298061.1	GCF_001314995.1	Bacteroidota	PsyrTA__PsyrA	1592	defense-finder-models/DefenseFinder_2/PsyrTA/PsyrTA	UserReplicon_PsyrTA_1	1	1	1	2	1	PsyrTA__PsyrA	mandatory	177	0.00084	16.5	0.151	0.345	11	71
Bacteria	WP_004298811.1	GCF_000210075.1	Bacteroidota	RM_Type_II__Type_II_MTases	124	defense-finder-models/RM/RM/RM_Type_II	UserReplicon_RM_Type_II_2	1	1	1	2	2	RM_Type_II__Type_II_MTases	mandatory	281	1e-100	334.5	0.732	0.972	8	280
Bacteria	WP_004298811.1	GCF_000210075.1	Bacteroidota	RM_Type_II__Type_II_MTases	1931	defense-finder-models/RM/RM/RM_Type_II	UserReplicon_RM_Type_II_3	1	1	1	2	2	RM_Type_II__Type_II_MTases	mandatory	281	1.1e-100	334.5	0.732	0.972	8	280
Bacteria	WP_004298814.1	GCF_000210075.1	Bacteroidota	RM_Type_II__Type_II_REases	125	defense-finder-models/RM/RM/RM_Type_II	UserReplicon_RM_Type_II_2	1	1	1	2	2	RM_Type_II__Type_II_REases	mandatory	437	2e-65	219.8	1.084	0.973	11	435
Bacteria	WP_004298814.1	GCF_000210075.1	Bacteroidota	RM_Type_II__Type_II_REases	1932	defense-finder-models/RM/RM/RM_Type_II	UserReplicon_RM_Type_II_3	1	1	1	2	2	RM_Type_II__Type_II_REases	mandatory	437	2.1e-65	219.8	1.084	0.973	11	435
Bacteria	WP_004298816.1	GCF_000210075.1	Bacteroidota	RM_Type_II__Type_II_MTases	126	defense-finder-models/RM/RM/RM_Type_II	UserReplicon_RM_Type_II_2	1	1	1	2	2	RM_Type_II__Type_II_MTases	mandatory	279	4.4e-81	270.3	0.656	0.853	14	251
Bacteria	WP_004298816.1	GCF_000210075.1	Bacteroidota	RM_Type_II__Type_II_MTases	1933	defense-finder-models/RM/RM/RM_Type_II	UserReplicon_RM_Type_II_3	1	1	1	2	2	RM_Type_II__Type_II_MTases	mandatory	279	4.7e-81	270.3	0.656	0.853	14	251
Bacteria	WP_004300254.1	GCF_001314995.1	Bacteroidota	AbiH__AbiH	2649	defense-finder-models/DefenseFinder_1/AbiH/AbiH	UserReplicon_AbiH_1	1	1	1	1	1	AbiH__AbiH	mandatory	373	8.9e-27	92.8	0.954	0.764	9	293
Bacteria	WP_004300583.1	GCF_000154205.1	Bacteroidota	RM__Type_I_REases	46	defense-finder-models/RM/RM/RM_Type_I	UserReplicon_RM_Type_I_2	1	1	1	2.5	2	RM__Type_I_REases	mandatory	976	2e-170	567	0.986	0.976	1	953
Bacteria	WP_004300583.1	GCF_000154205.1	Bacteroidota	RM__Type_I_REases	2837	defense-finder-models/RM/RM/RM_Type_I	UserReplicon_RM_Type_I_1	1	1	1	2.5	2	RM__Type_I_REases	mandatory	976	2.6e-170	567	0.986	0.976	1	953
Bacteria	WP_004300584.1	GCF_001314995.1	Bacteroidota	RM__Type_I_S	2838	defense-finder-models/RM/RM/RM_Type_I	UserReplicon_RM_Type_I_1	1	1	1	2.5	2	RM__Type_I_S	accessory	383	1.7e-30	104.7	0.459	0.922	19	371
Bacteria	WP_004300586.1	GCF_000154205.1	Bacteroidota	RM__Type_I_S	48	defense-finder-models/RM/RM/RM_Type_I	UserReplicon_RM_Type_I_2	1	1	1	2.5	2	RM__Type_I_S	accessory	376	2.2e-52	176.3	0.517	0.992	3	375
Bacteria	WP_004300586.1	GCF_000154205.1	Bacteroidota	RM__Type_I_S	2840	defense-finder-models/RM/RM/RM_Type_I	UserReplicon_RM_Type_I_1	1	1	1	2.5	2	RM__Type_I_S	accessory	376	2.9e-52	176.3	0.517	0.992	3	375
Bacteria	WP_004300587.1	GCF_000154205.1	Bacteroidota	RM__Type_I_MTases	49	defense-finder-models/RM/RM/RM_Type_I	UserReplicon_RM_Type_I_2	1	1	1	2.5	2	RM__Type_I_MTases	mandatory	510	1.3e-143	477.3	0.963	0.959	15	503
Bacteria	WP_004300587.1	GCF_000154205.1	Bacteroidota	RM__Type_I_MTases	2841	defense-finder-models/RM/RM/RM_Type_I	UserReplicon_RM_Type_I_1	1	1	1	2.5	2	RM__Type_I_MTases	mandatory	510	1.7e-143	477.3	0.963	0.959	15	503
Bacteria	WP_004300588.1	GCF_000154205.1	Bacteroidota	RM__Type_I_MTases	50	defense-finder-models/RM/RM/RM_Type_I	UserReplicon_RM_Type_I_2	1	1	1	2.5	2	RM__Type_I_MTases	mandatory	497	4.1e-148	492.2	0.951	0.962	13	490
Bacteria	WP_004300588.1	GCF_000154205.1	Bacteroidota	RM__Type_I_MTases	2842	defense-finder-models/RM/RM/RM_Type_I	UserReplicon_RM_Type_I_1	1	1	1	2.5	2	RM__Type_I_MTases	mandatory	497	5.2e-148	492.2	0.951	0.962	13	490
Bacteria	WP_004301432.1	GCF_001314995.1	Bacteroidota	PARIS_II__AAA_21	3287	defense-finder-models/DefenseFinder_3/Rst_PARIS/PARIS_II	UserReplicon_PARIS_II_1	1	1	1	2	1	PARIS_II__AAA_21	mandatory	287	7.2e-17	60.2	0.266	0.279	177	256
Bacteria	WP_004301434.1	GCF_001314995.1	Bacteroidota	Rst_PARIS__DUF4435	3288	defense-finder-models/DefenseFinder_3/Rst_PARIS/PARIS_II	UserReplicon_PARIS_II_1	1	1	1	2	1	Rst_PARIS__DUF4435	mandatory	342	3.6e-73	244.5	1	0.728	27	275
Bacteria	WP_004302001.1	GCF_001314995.1	Bacteroidota	Uzume__UzuA	3631	defense-finder-models/DefenseFinder_5/Uzume/Uzume	UserReplicon_Uzume_2	1	1	1	1	1	Uzume__UzuA	mandatory	283	1.9e-95	317.5	0.993	0.989	4	283
Bacteria	WP_004302003.1	GCF_001314995.1	Bacteroidota	RM__Type_I_S	3633	defense-finder-models/RM/RM/RM_Type_I	UserReplicon_RM_Type_I_2	1	1	1	2.5	1	RM__Type_I_S	accessory	354	3.5e-32	109.5	0.535	0.969	11	353
Bacteria	WP_004302005.1	GCF_001314995.1	Bacteroidota	RM__Type_I_S	3634	defense-finder-models/RM/RM/RM_Type_I	UserReplicon_RM_Type_I_2	1	1	1	2.5	1	RM__Type_I_S	accessory	204	1.1e-21	74.9	0.272	0.922	16	203
Bacteria	WP_004302007.1	GCF_001314995.1	Bacteroidota	RM__Type_I_MTases	3635	defense-finder-models/RM/RM/RM_Type_I	UserReplicon_RM_Type_I_2	1	1	1	2.5	1	RM__Type_I_MTases	mandatory	514	1.3e-175	583.2	0.992	0.994	2	512
Bacteria	WP_004302008.1	GCF_001314995.1	Bacteroidota	RM__Type_I_REases	3636	defense-finder-models/RM/RM/RM_Type_I	UserReplicon_RM_Type_I_2	1	1	1	2.5	1	RM__Type_I_REases	mandatory	943	1.3e-187	624.2	0.681	0.7	1	660
Bacteria	WP_004302150.1	GCF_001314995.1	Bacteroidota	Tiamat__TmtA_2752664533	3715	defense-finder-models/DefenseFinder_5/Tiamat/Tiamat	UserReplicon_Tiamat_1	1	1	1	1	1	Tiamat__TmtA	mandatory	1862	2.8e-97	325.1	0.359	0.295	467	1016
Bacteria	WP_004311263.1	GCF_000154205.1	Bacteroidota	RM_Type_IIG__Type_IIG	93	defense-finder-models/RM/RM/RM_Type_IIG	UserReplicon_RM_Type_IIG_4	1	1	1	1	1	RM_Type_IIG__Type_IIG	mandatory	1182	1.1e-137	458.7	0.869	0.959	41	1173
Bacteria	WP_004327330.1	GCF_000025985.1	Bacteroidota	RnlAB__RnlB	31	defense-finder-models/DefenseFinder_5/RnlAB/RnlAB	UserReplicon_RnlAB_1	1	1	1	2	1	RnlAB__RnlB	mandatory	128	2.4e-10	38.3	0.723	0.648	32	114
Bacteria	WP_004327332.1	GCF_000025985.1	Bacteroidota	RnlAB__RnlA	32	defense-finder-models/DefenseFinder_5/RnlAB/RnlAB	UserReplicon_RnlAB_1	1	1	1	2	1	RnlAB__RnlA	mandatory	349	2e-14	51.2	0.961	0.968	7	344
Bacteria	WP_004916190.1	GCF_000252855.1	Bacteroidota	RM_Type_IIG__Type_IIG	36	defense-finder-models/RM/RM/RM_Type_IIG	UserReplicon_RM_Type_IIG_5	1	1	1	1	1	RM_Type_IIG__Type_IIG	mandatory	1014	4.4e-193	641.1	1.039	0.996	3	1012
Bacteria	WP_004917508.1	GCF_000252855.1	Bacteroidota	RM_Type_II__Type_II_MTases	449	defense-finder-models/RM/RM/RM_Type_II	UserReplicon_RM_Type_II_2	1	1	1	2	2	RM_Type_II__Type_II_MTases	mandatory	308	2.5e-95	317.1	0.844	0.948	6	297
Bacteria	WP_004917511.1	GCF_000252855.1	Bacteroidota	RM_Type_II__Type_II_MTases	450	defense-finder-models/RM/RM/RM_Type_II	UserReplicon_RM_Type_II_2	1	1	1	2	2	RM_Type_II__Type_II_MTases	mandatory	354	5.2e-107	355	0.904	0.997	1	353
Bacteria	WP_004917512.1	GCF_000252855.1	Bacteroidota	RM_Type_II__Type_II_REases	451	defense-finder-models/RM/RM/RM_Type_II	UserReplicon_RM_Type_II_2	1	1	1	2	2	RM_Type_II__Type_II_REases	mandatory	462	2.3e-23	80.8	1.023	0.887	52	461
Bacteria	WP_004917689.1	GCF_000252855.1	Bacteroidota	RM_Type_IV__Type_IV_REases	507	defense-finder-models/RM/RM/RM_Type_IV	UserReplicon_RM_Type_IV_6	1	1	1	1	1	RM_Type_IV__Type_IV_REases	mandatory	462	5.6e-44	148	0.613	0.494	209	436
Bacteria	WP_004918078.1	GCF_000252855.1	Bacteroidota	ShosTA__ShosT	630	defense-finder-models/DefenseFinder_2/ShosTA/ShosTA	UserReplicon_ShosTA_1	1	1	1	2	1	ShosTA__ShosT	mandatory	217	1.5e-08	31.5	0.616	0.774	47	214
Bacteria	WP_004918085.1	GCF_000252855.1	Bacteroidota	ShosTA__ShosA	633	defense-finder-models/DefenseFinder_2/ShosTA/ShosTA	UserReplicon_ShosTA_1	1	1	1	2	1	ShosTA__ShosA	mandatory	367	7.8e-59	196.1	0.769	0.619	54	280
Bacteria	WP_004918209.1	GCF_000252855.1	Bacteroidota	Cas__cas1_I_II_III_IV_V_VI_5	670	defense-finder-models/Cas/Cas/CAS_Cluster	UserReplicon_CAS_Cluster_3	1	1	0.04	2	1	Cas__cas1_I_II_III_IV_V_VI_1	mandatory	299	5.8e-81	268.5	0.993	0.923	3	278
Bacteria	WP_004918211.1	GCF_000252855.1	Bacteroidota	Cas__cas2_I_II_III_IV_V_VI_6	671	defense-finder-models/Cas/Cas/CAS_Cluster	UserReplicon_CAS_Cluster_3	1	1	0.04	2	1	Cas__cas2_I_II_III_IV_V_VI_1	mandatory	112	2.6e-26	89	0.879	0.902	9	109
Bacteria	WP_004918625.1	GCF_000252855.1	Bacteroidota	RM__Type_I_REases	783	defense-finder-models/RM/RM/RM_Type_I	UserReplicon_RM_Type_I_1	1	1	1	2.5	1	RM__Type_I_REases	mandatory	1147	7.5e-137	454.8	0.826	0.789	212	1116
Bacteria	WP_004918627.1	GCF_000252855.1	Bacteroidota	RM__Type_I_S	784	defense-finder-models/RM/RM/RM_Type_I	UserReplicon_RM_Type_I_1	1	1	1	2.5	1	RM__Type_I_S	accessory	365	2.3e-72	241.6	0.448	0.868	49	365
Bacteria	WP_004918629.1	GCF_000252855.1	Bacteroidota	RM__Type_I_MTases	785	defense-finder-models/RM/RM/RM_Type_I	UserReplicon_RM_Type_I_1	1	1	1	2.5	1	RM__Type_I_MTases	mandatory	515	1.6e-157	521.8	0.955	0.992	1	511
Bacteria	WP_004919755.1	GCF_000252855.1	Bacteroidota	Cas__cas13b_VI-B_1	1160	defense-finder-models/Cas/Cas/CAS_Class2-Subtype-VI-B	UserReplicon_CAS_Class2-Subtype-VI-B_1	1	1	1	2	1	Cas__cas13b_VI-B_1	mandatory	1095	0	1115.5	0.985	0.993	8	1094
Bacteria	WP_004919758.1	GCF_000252855.1	Bacteroidota	Cas__tm_HEPN_VI-B_1	1161	defense-finder-models/Cas/Cas/CAS_Class2-Subtype-VI-B	UserReplicon_CAS_Class2-Subtype-VI-B_1	1	1	1	2	1	Cas__tm_4_VI-B_1	accessory	178	4.9e-77	254.6	0.967	0.994	1	177
Bacteria	WP_004920486.1	GCF_000252855.1	Bacteroidota	SoFic__SoFic	1324	defense-finder-models/DefenseFinder_5/SoFIC/SoFic	UserReplicon_SoFic_1	1	1	1	1	1	SoFic__SoFic	mandatory	371	1.3e-110	366.9	0.975	0.973	9	369
Bacteria	WP_004920740.1	GCF_000252855.1	Bacteroidota	RM_Type_II__Type_II_MTases	1371	defense-finder-models/RM/RM/RM_Type_II	UserReplicon_RM_Type_II_3	1	1	1	2	2	RM_Type_II__Type_II_MTases	mandatory	308	2.2e-91	302.8	0.73	0.951	5	297
Bacteria	WP_004920743.1	GCF_000252855.1	Bacteroidota	RM_Type_II__Type_II_REases	1372	defense-finder-models/RM/RM/RM_Type_II	UserReplicon_RM_Type_II_3	1	1	1	2	2	RM_Type_II__Type_II_REases	mandatory	279	1.4e-97	323.2	1.05	0.971	2	272
Bacteria	WP_004920747.1	GCF_000252855.1	Bacteroidota	RM_Type_II__Type_II_MTases	1373	defense-finder-models/RM/RM/RM_Type_II	UserReplicon_RM_Type_II_3	1	1	1	2	2	RM_Type_II__Type_II_MTases	mandatory	299	2.2e-82	273.4	0.675	0.819	10	254
Bacteria	WP_005634610.1	GCF_000154105.1	Bacteroidota	Eleos__LeoA	523	defense-finder-models/DefenseFinder_5/Eleos/Eleos	UserReplicon_Eleos_1	1	1	0.5	2	1	Eleos__LeoA	mandatory	296	8.8e-08	29.1	0.215	0.405	13	132
Bacteria	WP_005634613.1	GCF_000154105.1	Bacteroidota	Eleos__LeoBC	524	defense-finder-models/DefenseFinder_5/Eleos/Eleos	UserReplicon_Eleos_1	1	1	0.5	2	1	Eleos__LeoBC	mandatory	437	7.9e-13	45.8	0.19	0.277	5	125
Bacteria	WP_005635871.1	GCF_000154105.1	Bacteroidota	RM__Type_I_REases	860	defense-finder-models/RM/RM/RM_Type_I	UserReplicon_RM_Type_I_1	1	1	0.667	2	1	RM__Type_I_REases	mandatory	1434	4.9e-143	476.2	0.921	0.689	12	999
Bacteria	WP_005635875.1	GCF_000154105.1	Bacteroidota	RM__Type_I_MTases	861	defense-finder-models/RM/RM/RM_Type_I	UserReplicon_RM_Type_I_1	1	1	0.667	2	1	RM__Type_I_MTases	mandatory	862	4.7e-157	521.6	0.934	0.797	2	688
Bacteria	WP_005636228.1	GCF_000154105.1	Bacteroidota	Mokosh_TypeII__MkoC	931	defense-finder-models/DefenseFinder_4/Mokosh/Mokosh_TypeII	UserReplicon_Mokosh_TypeII_2	1	1	1	1	1	Mokosh_TypeII__MkoC	mandatory	1162	1.3e-204	680	0.504	0.503	457	1040
Bacteria	WP_005636924.1	GCF_000154105.1	Bacteroidota	AbiH__AbiH	1150	defense-finder-models/DefenseFinder_1/AbiH/AbiH	UserReplicon_AbiH_2	1	1	1	1	1	AbiH__AbiH	mandatory	379	2.6e-29	100.6	0.977	0.876	4	335
Bacteria	WP_005636924.1	GCF_000154105.1	Bacteroidota	AbiH__AbiH	145	defense-finder-models/DefenseFinder_1/AbiH/AbiH	UserReplicon_AbiH_2	1	1	1	1	1	AbiH__AbiH	mandatory	379	2.4e-29	100.6	0.977	0.876	4	335
Bacteria	WP_005638554.1	GCF_000154105.1	Bacteroidota	RM__Type_I_REases	1697	defense-finder-models/RM/RM/RM_Type_I	UserReplicon_RM_Type_I_2	1	1	1	2.5	1	RM__Type_I_REases	mandatory	1042	4.3e-215	714.8	0.992	0.973	7	1020
Bacteria	WP_005638561.1	GCF_000154105.1	Bacteroidota	RM__Type_I_S	1699	defense-finder-models/RM/RM/RM_Type_I	UserReplicon_RM_Type_I_2	1	1	1	2.5	1	RM__Type_I_S	accessory	397	1.5e-43	147.1	0.469	0.987	3	394
Bacteria	WP_005638565.1	GCF_000154105.1	Bacteroidota	RM__Type_I_S	1700	defense-finder-models/RM/RM/RM_Type_I	UserReplicon_RM_Type_I_2	1	1	1	2.5	1	RM__Type_I_S	accessory	248	1.5e-22	77.8	0.277	0.923	15	243
Bacteria	WP_005638571.1	GCF_000154105.1	Bacteroidota	RM__Type_I_MTases	1702	defense-finder-models/RM/RM/RM_Type_I	UserReplicon_RM_Type_I_2	1	1	1	2.5	1	RM__Type_I_MTases	mandatory	513	1.9e-166	552.6	0.99	0.979	9	510
Bacteria	WP_005639049.1	GCF_000154105.1	Bacteroidota	PARIS_II_merge__AAA_21_DUF4435	1860	defense-finder-models/DefenseFinder_3/Rst_PARIS/PARIS_II_merge	UserReplicon_PARIS_II_merge_1	1	1	1	1	1	PARIS_II_merge__AAA_21_DUF4435	mandatory	519	1.8e-117	390.8	0.737	0.825	86	513
Bacteria	WP_005640368.1	GCF_000154105.1	Bacteroidota	AbiL__AbiLi2	2280	defense-finder-models/DefenseFinder_1/AbiL/AbiL	UserReplicon_AbiL_3	1	1	1	2	1	AbiL__AbiLi	mandatory	414	3.6e-31	106.5	0.446	0.49	205	407
Bacteria	WP_005640372.1	GCF_000012825.1	Bacteroidota	AbiL__AbiLii2	2281	defense-finder-models/DefenseFinder_1/AbiL/AbiL	UserReplicon_AbiL_3	1	1	1	2	1	AbiL__AbiLii	mandatory	180	2.3e-07	28.1	0.162	0.25	94	138
Bacteria	WP_005640421.1	GCF_000154105.1	Bacteroidota	AbiEii__AbiEi_4	2292	defense-finder-models/DefenseFinder_1/AbiE/AbiE	UserReplicon_AbiE_1	1	1	1	2	1	AbiEii__AbiEi_1	mandatory	193	1.7e-07	29	0.918	0.223	6	48
Bacteria	WP_005640423.1	GCF_000154105.1	Bacteroidota	AbiEii__AbiEii	2293	defense-finder-models/DefenseFinder_1/AbiE/AbiE	UserReplicon_AbiE_1	1	1	1	2	1	AbiEii__AbiEii	mandatory	291	4.5e-41	139	0.996	0.814	36	272
Bacteria	WP_005640853.1	GCF_000154105.1	Bacteroidota	Zorya__ZorA2	2437	defense-finder-models/DefenseFinder_4/Zorya/Zorya_TypeI	UserReplicon_Zorya_TypeI_3	1	1	0.75	3	1	Zorya__ZorA	mandatory	497	1.4e-07	28.4	0.195	0.167	22	104
Bacteria	WP_005640854.1	GCF_000154105.1	Bacteroidota	Zorya__ZorB	2438	defense-finder-models/DefenseFinder_4/Zorya/Zorya_TypeI	UserReplicon_Zorya_TypeI_3	1	1	0.75	3	1	Zorya__ZorB	mandatory	232	1e-06	25.9	0.525	0.573	9	141
Bacteria	WP_005640855.1	GCF_000154105.1	Bacteroidota	Tiamat__TmtA_2731874159	2439	defense-finder-models/DefenseFinder_5/Tiamat/Tiamat	UserReplicon_Tiamat_2	1	1	1	1	1	Tiamat__TmtA	mandatory	1641	0	1205.7	0.995	0.979	1	1606
Bacteria	WP_005640856.1	GCF_000154105.1	Bacteroidota	Zorya_TypeI__ZorD	2440	defense-finder-models/DefenseFinder_4/Zorya/Zorya_TypeI	UserReplicon_Zorya_TypeI_3	1	1	0.75	3	1	Zorya_TypeI__ZorD	mandatory	949	5.9e-15	51.9	0.227	0.232	38	257
Bacteria	WP_005640887.1	GCF_000154105.1	Bacteroidota	Menshen__NsnC_2512525018	2446	defense-finder-models/DefenseFinder_4/Menshen/Menshen	UserReplicon_Menshen_1	1	1	0.667	2	1	Menshen__NsnC_2507451963	mandatory	239	1.4e-56	189.3	0.992	0.954	3	230
Bacteria	WP_005640889.1	GCF_000154105.1	Bacteroidota	Menshen__NsnB	2447	defense-finder-models/DefenseFinder_4/Menshen/Menshen	UserReplicon_Menshen_1	1	1	0.667	2	1	Menshen__NsnB	mandatory	340	1.8e-75	252.3	0.994	0.991	1	337
Bacteria	WP_005641470.1	GCF_000154105.1	Bacteroidota	Cas__cas5_I-C_11	2655	defense-finder-models/Cas/Cas/CAS_Class1-Subtype-I-C	UserReplicon_CAS_Class1-Subtype-I-C_1	1	1	0.714	5	1	Cas__cas5_I-C_11	mandatory	226	1.6e-79	264	0.995	0.925	9	217
Bacteria	WP_005641472.1	GCF_000154105.1	Bacteroidota	Cas__cas8c_I-C_2	2656	defense-finder-models/Cas/Cas/CAS_Class1-Subtype-I-C	UserReplicon_CAS_Class1-Subtype-I-C_1	1	1	0.714	5	1	Cas__cas8c_I-C_4	mandatory	584	1.8e-159	529.5	1	0.983	3	576
Bacteria	WP_005641474.1	GCF_000154105.1	Bacteroidota	Cas__cas7_I-C_7	2657	defense-finder-models/Cas/Cas/CAS_Class1-Subtype-I-C	UserReplicon_CAS_Class1-Subtype-I-C_1	1	1	0.714	5	1	Cas__cas7_I-C_13	mandatory	288	5.9e-120	397.3	0.993	0.965	8	285
Bacteria	WP_005641476.1	GCF_000154105.1	Bacteroidota	Cas__cas4_I_II_III_IV_V_VI_6	2658	defense-finder-models/Cas/Cas/CAS_Class1-Subtype-I-C	UserReplicon_CAS_Class1-Subtype-I-C_1	1	1	0.714	5	1	Cas__cas4_I_II_III_IV_V_VI_1	accessory	222	4.6e-37	125.3	0.994	0.869	12	204
Bacteria	WP_005641478.1	GCF_000154105.1	Bacteroidota	Cas__cas1_I_II_III_IV_V_VI_6	2659	defense-finder-models/Cas/Cas/CAS_Class1-Subtype-I-C	UserReplicon_CAS_Class1-Subtype-I-C_1	1	1	0.714	5	1	Cas__cas1_I_II_III_IV_V_VI_6	accessory	344	4.5e-144	477.3	1	0.985	4	342
Bacteria	WP_005651722.1	GCF_000154525.1	Bacteroidota	RM_Type_IIG__Type_IIG	189	defense-finder-models/RM/RM/RM_Type_IIG	UserReplicon_RM_Type_IIG_3	1	1	1	1	1	RM_Type_IIG__Type_IIG	mandatory	1182	1.2e-137	458.4	0.869	0.959	41	1173
Bacteria	WP_005651856.1	GCF_000154525.1	Bacteroidota	AbiH__AbiH	226	defense-finder-models/DefenseFinder_1/AbiH/AbiH	UserReplicon_AbiH_3	1	1	1	1	1	AbiH__AbiH	mandatory	283	5.2e-26	89.7	0.954	0.777	10	229
Bacteria	WP_005652528.1	GCF_000154525.1	Bacteroidota	CBASS__2TM_Gros	463	defense-finder-models/DefenseFinder_5/CBASS/CBASS_I	UserReplicon_CBASS_I_2	1	1	1	2	1	CBASS__Effector_2TM_S_2TMBeta	mandatory	186	6.9e-22	76.2	0.759	0.989	1	184
Bacteria	WP_005652530.1	GCF_000154525.1	Bacteroidota	CBASS__Cyclase_SMODS	464	defense-finder-models/DefenseFinder_5/CBASS/CBASS_I	UserReplicon_CBASS_I_2	1	1	1	2	1	CBASS__Cyclase_SMODS	mandatory	269	5.9e-41	137.9	0.902	0.576	12	166
Bacteria	WP_005652536.1	GCF_000154525.1	Bacteroidota	RM__Type_I_REases	465	defense-finder-models/RM/RM/RM_Type_I	UserReplicon_RM_Type_I_1	1	1	1	2.5	1	RM__Type_I_REases	mandatory	1076	1.6e-91	305.6	0.721	0.722	93	869
Bacteria	WP_005652538.1	GCF_000154525.1	Bacteroidota	RM__Type_I_MTases	466	defense-finder-models/RM/RM/RM_Type_I	UserReplicon_RM_Type_I_1	1	1	1	2.5	1	RM__Type_I_MTases	mandatory	553	1e-104	348.8	0.99	0.978	6	546
Bacteria	WP_005652541.1	GCF_000154525.1	Bacteroidota	RM__Type_I_S	468	defense-finder-models/RM/RM/RM_Type_I	UserReplicon_RM_Type_I_1	1	1	1	2.5	1	RM__Type_I_S	accessory	402	6.3e-46	154.8	0.465	0.988	4	400
Bacteria	WP_005652928.1	GCF_000154525.1	Bacteroidota	RM_Type_IIG__Type_IIG	594	defense-finder-models/RM/RM/RM_Type_IIG	UserReplicon_RM_Type_IIG_4	1	1	1	1	1	RM_Type_IIG__Type_IIG	mandatory	1275	6e-142	472.6	0.966	0.958	41	1261
Bacteria	WP_005656802.1	GCF_000154525.1	Bacteroidota	RM_Type_II__Type_II_REases	2041	defense-finder-models/RM/RM/RM_Type_II	UserReplicon_RM_Type_II_2	1	1	1	2	1	RM_Type_II__Type_II_REases	mandatory	390	9.7e-32	108.7	0.985	0.926	10	370
Bacteria	WP_005656804.1	GCF_000154525.1	Bacteroidota	RM_Type_II__Type_II_MTases	2042	defense-finder-models/RM/RM/RM_Type_II	UserReplicon_RM_Type_II_2	1	1	1	2	1	RM_Type_II__Type_II_MTases	mandatory	856	9.8e-56	187.1	0.967	0.445	29	409
Bacteria	WP_005656845.1	GCF_000154525.1	Bacteroidota	PD-T4-10__PD-T4-10_A	2052	defense-finder-models/DefenseFinder_3/PD-T4-10/PD-T4-10	UserReplicon_PD-T4-10_1	1	1	1	2	1	PD-T4-10__PD-T4-10_A	mandatory	146	1.8e-55	184.3	0.993	0.993	1	145
Bacteria	WP_005656847.1	GCF_000154525.1	Bacteroidota	PD-T4-10__PD-T4-10_B	2053	defense-finder-models/DefenseFinder_3/PD-T4-10/PD-T4-10	UserReplicon_PD-T4-10_1	1	1	1	2	1	PD-T4-10__PD-T4-10_B	mandatory	415	3.6e-102	339.8	0.966	0.906	1	376
Bacteria	WP_005657662.1	GCF_000154525.1	Bacteroidota	Eleos__LeoA	2367	defense-finder-models/DefenseFinder_5/Eleos/Eleos	UserReplicon_Eleos_3	1	1	0.5	2	1	Eleos__LeoA	mandatory	310	2.9e-05	20.7	0.125	0.248	163	239
Bacteria	WP_005657681.1	GCF_000154525.1	Bacteroidota	Eleos__LeoBC	2372	defense-finder-models/DefenseFinder_5/Eleos/Eleos	UserReplicon_Eleos_3	1	1	0.5	2	1	Eleos__LeoBC	mandatory	419	2e-05	21.3	0.283	0.42	193	368
Bacteria	WP_005657707.1	GCF_000154525.1	Bacteroidota	Eleos__LeoA	2376	defense-finder-models/DefenseFinder_5/Eleos/Eleos	UserReplicon_Eleos_3	1	1	0.5	2	1	Eleos__LeoA	mandatory	524	1.3e-06	25.1	0.218	0.261	20	156
Bacteria	WP_005658392.1	GCF_000154525.1	Bacteroidota	Eleos__LeoBC	2655	defense-finder-models/DefenseFinder_5/Eleos/Eleos	UserReplicon_Eleos_4	1	1	0.5	2	1	Eleos__LeoBC	mandatory	437	8.2e-11	39.1	0.203	0.295	5	133
Bacteria	WP_005658395.1	GCF_000154525.1	Bacteroidota	Eleos__LeoA	2656	defense-finder-models/DefenseFinder_5/Eleos/Eleos	UserReplicon_Eleos_4	1	1	0.5	2	1	Eleos__LeoA	mandatory	293	1e-06	25.5	0.172	0.341	10	109
Bacteria	WP_005675361.1	GCF_002222615.2	Bacteroidota	RM__Type_I_MTases	166	defense-finder-models/RM/RM/RM_Type_I	UserReplicon_RM_Type_I_1	1	1	1	2.5	2	RM__Type_I_MTases	mandatory	508	6.2e-147	488.2	0.955	0.945	24	503
Bacteria	WP_005675362.1	GCF_002222615.2	Bacteroidota	RM__Type_I_MTases	167	defense-finder-models/RM/RM/RM_Type_I	UserReplicon_RM_Type_I_1	1	1	1	2.5	2	RM__Type_I_MTases	mandatory	506	3.7e-145	482.3	0.957	0.958	15	499
Bacteria	WP_005675363.1	GCF_002222615.2	Bacteroidota	RM__Type_I_S	168	defense-finder-models/RM/RM/RM_Type_I	UserReplicon_RM_Type_I_1	1	1	1	2.5	2	RM__Type_I_S	accessory	370	1.7e-50	170	0.493	0.943	21	369
Bacteria	WP_005675366.1	GCF_002222615.2	Bacteroidota	RM__Type_I_S	171	defense-finder-models/RM/RM/RM_Type_I	UserReplicon_RM_Type_I_1	1	1	1	2.5	2	RM__Type_I_S	accessory	361	5.9e-31	105.6	0.425	0.936	21	358
Bacteria	WP_005675367.1	GCF_002222615.2	Bacteroidota	RM__Type_I_REases	172	defense-finder-models/RM/RM/RM_Type_I	UserReplicon_RM_Type_I_1	1	1	1	2.5	2	RM__Type_I_REases	mandatory	977	2.2e-169	563.5	0.984	0.973	4	954
Bacteria	WP_005675691.1	GCF_002222615.2	Bacteroidota	RM_Type_II__Type_II_MTases	368	defense-finder-models/RM/RM/RM_Type_II	UserReplicon_RM_Type_II_3	1	1	1	2	2	RM_Type_II__Type_II_MTases	mandatory	370	4.2e-123	408.4	0.888	0.895	38	368
Bacteria	WP_005675692.1	GCF_002222615.2	Bacteroidota	RM_Type_II__Type_II_MTases	369	defense-finder-models/RM/RM/RM_Type_II	UserReplicon_RM_Type_II_3	1	1	1	2	2	RM_Type_II__Type_II_MTases	mandatory	301	3.7e-64	214.8	0.828	0.997	2	301
Bacteria	WP_005675693.1	GCF_002222615.2	Bacteroidota	RM_Type_II__Type_II_REases	370	defense-finder-models/RM/RM/RM_Type_II	UserReplicon_RM_Type_II_3	1	1	1	2	2	RM_Type_II__Type_II_REases	mandatory	535	2.4e-113	377.6	2.011	0.996	2	534
Bacteria	WP_005676702.1	GCF_002222615.2	Bacteroidota	RM_Type_II__Type_II_REases	1007	defense-finder-models/RM/RM/RM_Type_II	UserReplicon_RM_Type_II_4	1	1	1	2	1	RM_Type_II__Type_II_REases	mandatory	390	3.2e-27	94.2	1.355	0.982	7	389
Bacteria	WP_005676705.1	GCF_002222615.2	Bacteroidota	RM_Type_II__Type_II_MTases	1009	defense-finder-models/RM/RM/RM_Type_II	UserReplicon_RM_Type_II_4	1	1	1	2	1	RM_Type_II__Type_II_MTases	mandatory	397	1.3e-84	281.9	0.809	0.841	3	336
Bacteria	WP_005676907.1	GCF_002222615.2	Bacteroidota	PsyrTA__PsyrT	1147	defense-finder-models/DefenseFinder_2/PsyrTA/PsyrTA	UserReplicon_PsyrTA_1	1	1	1	2	1	PsyrTA__PsyrT	mandatory	640	2.7e-21	73.1	0.554	0.606	29	416
Bacteria	WP_005676910.1	GCF_002222615.2	Bacteroidota	PsyrTA__PsyrA	1150	defense-finder-models/DefenseFinder_2/PsyrTA/PsyrTA	UserReplicon_PsyrTA_1	1	1	1	2	1	PsyrTA__PsyrA	mandatory	177	0.00016	18.4	0.156	0.356	11	73
Bacteria	WP_005677188.1	GCF_002222615.2	Bacteroidota	PARIS_II__AAA_21	1324	defense-finder-models/DefenseFinder_3/Rst_PARIS/PARIS_II	UserReplicon_PARIS_II_1	1	1	1	2	1	PARIS_II__AAA_21	mandatory	287	8.5e-18	62.8	0.273	0.286	175	256
Bacteria	WP_005677189.1	GCF_002222615.2	Bacteroidota	Rst_PARIS__DUF4435	1325	defense-finder-models/DefenseFinder_3/Rst_PARIS/PARIS_II	UserReplicon_PARIS_II_1	1	1	1	2	1	Rst_PARIS__DUF4435	mandatory	333	3.4e-69	231.1	1	0.748	27	275
Bacteria	WP_005677513.1	GCF_002222615.2	Bacteroidota	RM_Type_IV__Type_IV_REases	1530	defense-finder-models/RM/RM/RM_Type_IV	UserReplicon_RM_Type_IV_5	1	1	1	1	2	RM_Type_IV__Type_IV_REases	mandatory	580	1.9e-84	282.4	0.663	0.459	304	569
Bacteria	WP_005677514.1	GCF_002222615.2	Bacteroidota	RM_Type_IV__Type_IV_REases	1531	defense-finder-models/RM/RM/RM_Type_IV	UserReplicon_RM_Type_IV_5	1	1	1	1	2	RM_Type_IV__Type_IV_REases	mandatory	347	1.4e-56	189.6	0.822	0.98	5	344
Bacteria	WP_005678055.1	GCF_002222615.2	Bacteroidota	RM__Type_I_S	1870	defense-finder-models/RM/RM/RM_Type_I	UserReplicon_RM_Type_I_2	1	1	1	2.5	1	RM__Type_I_S	accessory	473	1.5e-57	193.5	0.468	0.899	45	469
Bacteria	WP_005678059.1	GCF_002222615.2	Bacteroidota	RM__Type_I_MTases	1871	defense-finder-models/RM/RM/RM_Type_I	UserReplicon_RM_Type_I_2	1	1	1	2.5	1	RM__Type_I_MTases	mandatory	472	1.2e-167	556.4	0.955	0.985	7	471
Bacteria	WP_005678061.1	GCF_002222615.2	Bacteroidota	RM__Type_I_REases	1873	defense-finder-models/RM/RM/RM_Type_I	UserReplicon_RM_Type_I_2	1	1	1	2.5	1	RM__Type_I_REases	mandatory	901	1.9e-128	427.8	0.598	0.691	1	623
Bacteria	WP_005784896.1	GCF_000025985.1	Bacteroidota	PARIS_II__AAA_21	390	defense-finder-models/DefenseFinder_3/Rst_PARIS/PARIS_II	UserReplicon_PARIS_II_1	1	1	1	2	1	PARIS_II__AAA_21	mandatory	275	7.6e-17	60	0.26	0.284	179	256
Bacteria	WP_005784898.1	GCF_000025985.1	Bacteroidota	Rst_PARIS__DUF4435	391	defense-finder-models/DefenseFinder_3/Rst_PARIS/PARIS_II	UserReplicon_PARIS_II_1	1	1	1	2	1	Rst_PARIS__DUF4435	mandatory	338	9.1e-68	226.6	1	0.737	27	275
Bacteria	WP_005788865.1	GCF_000025985.1	Bacteroidota	RM_Type_IV__Type_IV_REases	1023	defense-finder-models/RM/RM/RM_Type_IV	UserReplicon_RM_Type_IV_6	1	1	1	1	1	RM_Type_IV__Type_IV_REases	mandatory	650	3.6e-113	377.4	0.922	0.695	199	650
Bacteria	WP_005802632.1	GCF_000012825.1	Bacteroidota	Menshen__NsnC_2631934571	90	defense-finder-models/DefenseFinder_4/Menshen/Menshen	UserReplicon_Menshen_1	1	1	1	3	1	Menshen__NsnC_2507451963	mandatory	301	1.6e-31	107.8	0.987	0.977	1	294
Bacteria	WP_005802633.1	GCF_000012825.1	Bacteroidota	Menshen__NsnB	91	defense-finder-models/DefenseFinder_4/Menshen/Menshen	UserReplicon_Menshen_1	1	1	1	3	1	Menshen__NsnB	mandatory	327	1.8e-89	298.5	0.994	1	1	327
Bacteria	WP_005802634.1	GCF_000012825.1	Bacteroidota	Menshen__NsnA	92	defense-finder-models/DefenseFinder_4/Menshen/Menshen	UserReplicon_Menshen_1	1	1	1	3	1	Menshen__NsnA	mandatory	467	1.4e-116	387.6	0.94	0.865	60	463
Bacteria	WP_005816313.1	GCF_013009555.1	Bacteroidota	ShosTA__ShosA	186	defense-finder-models/DefenseFinder_2/ShosTA/ShosTA	UserReplicon_ShosTA_2	1	1	1	2	1	ShosTA__ShosA	mandatory	163	3.9e-05	20.9	0.363	0.699	47	160
Bacteria	WP_005816315.1	GCF_013009555.1	Bacteroidota	ShosTA__ShosT	187	defense-finder-models/DefenseFinder_2/ShosTA/ShosTA	UserReplicon_ShosTA_2	1	1	1	2	1	ShosTA__ShosT	mandatory	188	9.5e-13	46.3	0.679	0.926	11	184
Bacteria	WP_005823997.1	GCF_000154205.1	Bacteroidota	Rst_PARIS__DUF4435	354	defense-finder-models/DefenseFinder_3/Rst_PARIS/PARIS_II	UserReplicon_PARIS_II_1	1	1	1	2	1	Rst_PARIS__DUF4435	mandatory	337	2.2e-69	231.7	1	0.739	27	275
Bacteria	WP_005823999.1	GCF_000154205.1	Bacteroidota	PARIS_II__AAA_21	355	defense-finder-models/DefenseFinder_3/Rst_PARIS/PARIS_II	UserReplicon_PARIS_II_1	1	1	1	2	1	PARIS_II__AAA_21	mandatory	276	6.3e-19	66.6	0.428	0.424	139	255
Bacteria	WP_005825412.1	GCF_000154205.1	Bacteroidota	AbiL__AbiLi2	806	defense-finder-models/DefenseFinder_1/AbiL/AbiL	UserReplicon_AbiL_3	1	1	1	2	1	AbiL__AbiLi	mandatory	453	4.3e-27	93.1	0.277	0.287	315	444
Bacteria	WP_005825413.1	GCF_000154205.1	Bacteroidota	AbiL__AbiLii2	807	defense-finder-models/DefenseFinder_1/AbiL/AbiL	UserReplicon_AbiL_3	1	1	1	2	1	AbiL__AbiLii	mandatory	361	4.7e-05	20.6	0.195	0.163	100	158
Bacteria	WP_005825418.1	GCF_000154205.1	Bacteroidota	Gabija__GajB_2	811	defense-finder-models/DefenseFinder_1/Gabija/Gabija	UserReplicon_Gabija_4	1	1	1	2	1	Gabija__GajB_1	mandatory	589	3.1e-91	304.4	0.737	0.964	8	575
Bacteria	WP_005825419.1	GCF_000154205.1	Bacteroidota	Gabija__GajA	812	defense-finder-models/DefenseFinder_1/Gabija/Gabija	UserReplicon_Gabija_4	1	1	1	2	1	Gabija__GajA	mandatory	691	1.8e-111	371.6	0.992	0.909	1	628
Bacteria	WP_005825528.1	GCF_000154205.1	Bacteroidota	RM_Type_II__Type_II_REases	858	defense-finder-models/RM/RM/RM_Type_II	UserReplicon_RM_Type_II_3	1	1	1	2	1	RM_Type_II__Type_II_REases	mandatory	286	6.7e-108	358	1.057	0.997	1	285
Bacteria	WP_005825531.1	GCF_000154205.1	Bacteroidota	RM_Type_II__Type_II_MTases	860	defense-finder-models/RM/RM/RM_Type_II	UserReplicon_RM_Type_II_3	1	1	1	2	1	RM_Type_II__Type_II_MTases	mandatory	290	9.5e-87	288.6	0.68	0.852	9	255
Bacteria	WP_005826879.1	GCF_000154205.1	Bacteroidota	Gao_Tmn__TmnA	1379	defense-finder-models/DefenseFinder_1/Gao_Tmn/Gao_Tmn	UserReplicon_Gao_Tmn_5	1	1	1	1	1	Gao_Tmn__TmnA	mandatory	562	1.5e-60	202.6	0.391	0.859	11	493
Bacteria	WP_005828737.1	GCF_000154205.1	Bacteroidota	AbiH__AbiH	1971	defense-finder-models/DefenseFinder_1/AbiH/AbiH	UserReplicon_AbiH_1	1	1	1	1	1	AbiH__AbiH	mandatory	379	4.9e-29	99.8	0.977	0.876	4	335
Bacteria	WP_005829040.1	GCF_000154205.1	Bacteroidota	PD-Lambda-5__PD-Lambda-5_A	2068	defense-finder-models/RM/PD-Lambda-5/PD-Lambda-5	UserReplicon_PD-Lambda-5_1	1	1	1	2	2	PD-Lambda-5__PD-Lambda-5_A	mandatory	378	9.4e-107	355.3	0.816	0.989	4	377
Bacteria	WP_005829042.1	GCF_000154205.1	Bacteroidota	PD-Lambda-5__PD-Lambda-5_A	2069	defense-finder-models/RM/PD-Lambda-5/PD-Lambda-5	UserReplicon_PD-Lambda-5_1	1	1	1	2	2	PD-Lambda-5__PD-Lambda-5_A	mandatory	99	9.1e-15	52	0.178	0.859	12	96
Bacteria	WP_005829044.1	GCF_000154205.1	Bacteroidota	PD-Lambda-5__PD-Lambda-5_B	2070	defense-finder-models/RM/PD-Lambda-5/PD-Lambda-5	UserReplicon_PD-Lambda-5_1	1	1	1	2	2	PD-Lambda-5__PD-Lambda-5_B	mandatory	289	2e-116	385.9	0.972	0.976	2	283
Bacteria	WP_005829536.1	GCF_000154205.1	Bacteroidota	Eleos__LeoA	2227	defense-finder-models/DefenseFinder_5/Eleos/Eleos	UserReplicon_Eleos_1	1	1	0.5	2	1	Eleos__LeoA	mandatory	293	7.9e-06	22.8	0.168	0.334	10	107
Bacteria	WP_005829538.1	GCF_000154205.1	Bacteroidota	Eleos__LeoBC	2228	defense-finder-models/DefenseFinder_5/Eleos/Eleos	UserReplicon_Eleos_1	1	1	0.5	2	1	Eleos__LeoBC	mandatory	437	3.1e-11	40.7	0.201	0.293	5	132
Bacteria	WP_005835694.1	GCF_013009555.1	Bacteroidota	AbiH__AbiH	199	defense-finder-models/DefenseFinder_1/AbiH/AbiH	UserReplicon_AbiH_2	1	1	1	1	1	AbiH__AbiH	mandatory	325	4.9e-49	165.6	0.996	0.855	5	282
Bacteria	WP_005845198.1	GCF_000012825.1	Bacteroidota	AbiL__AbiLii	1181	defense-finder-models/DefenseFinder_1/AbiL/AbiL	UserReplicon_AbiL_3	1	1	1	2	1	AbiL__AbiLii	mandatory	237	6.5e-09	33.1	0.192	0.232	82	136
Bacteria	WP_005845203.1	GCF_000012825.1	Bacteroidota	AbiL__AbiLi2	1182	defense-finder-models/DefenseFinder_1/AbiL/AbiL	UserReplicon_AbiL_3	1	1	1	2	1	AbiL__AbiLi	mandatory	436	3.4e-56	189.2	0.982	0.993	1	433
Bacteria	WP_005847388.1	GCF_000012825.1	Bacteroidota	Septu__PtuB	1567	defense-finder-models/DefenseFinder_2/Septu/Septu	UserReplicon_Septu_1	1	1	1	2	1	Septu__PtuB	mandatory	273	3.3e-16	58	0.706	0.729	37	235
Bacteria	WP_005847390.1	GCF_000012825.1	Bacteroidota	Septu__PtuA	1568	defense-finder-models/DefenseFinder_2/Septu/Septu	UserReplicon_Septu_1	1	1	1	2	1	Septu__PtuA	mandatory	445	1.3e-65	220.7	0.924	0.957	1	426
Bacteria	WP_005856765.1	GCF_000012845.1	Bacteroidota	Cas__cas2_I_II_III_IV_V_VI_3	547	defense-finder-models/Cas/Cas/CAS_Cluster	UserReplicon_CAS_Cluster_3	1	1	0.04	2	1	Cas__cas2_I_II_III_IV_V_VI_1	mandatory	96	5.4e-27	91.6	0.987	0.865	3	85
Bacteria	WP_005856767.1	GCF_000012845.1	Bacteroidota	Cas__cas1_I_II_III_IV_V_VI_6	548	defense-finder-models/Cas/Cas/CAS_Cluster	UserReplicon_CAS_Cluster_3	1	1	0.04	2	1	Cas__cas1_I_II_III_IV_V_VI_1	mandatory	340	3.1e-134	445.1	1	0.985	4	338
Bacteria	WP_005857298.1	GCF_000012845.1	Bacteroidota	PARIS_II_merge__AAA_21_DUF4435	658	defense-finder-models/DefenseFinder_3/Rst_PARIS/PARIS_II_merge	UserReplicon_PARIS_II_merge_2	1	1	1	1	1	PARIS_II_merge__AAA_21_DUF4435	mandatory	518	1.6e-122	407.6	0.94	0.992	2	515
Bacteria	WP_005861760.1	GCF_000012845.1	Bacteroidota	Gao_Her_DUF__DUF4297	1344	defense-finder-models/DefenseFinder_3/Gao_Her/Gao_Her_DUF	UserReplicon_Gao_Her_DUF_1	1	1	1	2	1	Gao_Her_DUF__DUF4297	mandatory	391	5.8e-131	434.9	0.997	0.992	4	391
Bacteria	WP_005861761.1	GCF_000012845.1	Bacteroidota	Gao_Her_DUF__HerA_DUF	1345	defense-finder-models/DefenseFinder_3/Gao_Her/Gao_Her_DUF	UserReplicon_Gao_Her_DUF_1	1	1	1	2	1	Gao_Her_DUF__HerA_DUF	mandatory	584	1.9e-280	929.4	0.998	0.998	2	584
Bacteria	WP_006846509.1	GCF_000157935.1	Bacteroidota	RM_Type_IV__Type_IV_REases	201	defense-finder-models/RM/RM/RM_Type_IV	UserReplicon_RM_Type_IV_13	1	1	1	1	1	RM_Type_IV__Type_IV_REases	mandatory	670	6.7e-35	118.6	0.406	0.252	466	634
Bacteria	WP_006846510.1	GCF_000157935.1	Bacteroidota	Druantia__DruE_3	202	defense-finder-models/DefenseFinder_3/Druantia/Druantia_III	UserReplicon_Druantia_III_1	1	1	1	2	1	Druantia__DruE_1	mandatory	2132	1.1e-171	570.9	0.792	0.804	392	2105
Bacteria	WP_006846511.1	GCF_000157935.1	Bacteroidota	Druantia_III__DruH	203	defense-finder-models/DefenseFinder_3/Druantia/Druantia_III	UserReplicon_Druantia_III_1	1	1	1	2	1	Druantia_III__DruH	mandatory	860	9.2e-08	27.7	0.128	0.155	24	156
Bacteria	WP_006846515.1	GCF_000157935.1	Bacteroidota	RM_Type_IIG__Type_IIG	206	defense-finder-models/RM/RM/RM_Type_IIG	UserReplicon_RM_Type_IIG_6	1	1	1	1	1	RM_Type_IIG__Type_IIG	mandatory	1315	2.1e-148	493.7	0.7	0.995	7	1315
Bacteria	WP_006846615.1	GCF_000157935.1	Bacteroidota	RM_Type_III__Type_III_MTases	268	defense-finder-models/RM/RM/RM_Type_III	UserReplicon_RM_Type_III_10	1	1	1	2	1	RM_Type_III__Type_III_MTases	mandatory	673	1.5e-70	236.2	0.745	0.746	24	525
Bacteria	WP_006846616.1	GCF_000157935.1	Bacteroidota	RM_Type_III__Type_III_REases	269	defense-finder-models/RM/RM/RM_Type_III	UserReplicon_RM_Type_III_10	1	1	1	2	1	RM_Type_III__Type_III_REases	mandatory	962	3.1e-30	102.4	0.384	0.369	28	382
Bacteria	WP_006846935.1	GCF_000157935.1	Bacteroidota	RM_Type_IV__Type_IV_REases	509	defense-finder-models/RM/RM/RM_Type_IV	UserReplicon_RM_Type_IV_14	1	1	1	1	1	RM_Type_IV__Type_IV_REases	mandatory	735	9.3e-64	213.8	0.696	0.574	276	697
Bacteria	WP_006846948.1	GCF_000157935.1	Bacteroidota	AbiD__AbiD	520	defense-finder-models/DefenseFinder_1/AbiD/AbiD	UserReplicon_AbiD_1	1	1	1	1	1	AbiD__AbiD	mandatory	307	4.1e-77	257	0.929	0.99	1	304
Bacteria	WP_006847034.1	GCF_000157935.1	Bacteroidota	RM_Type_II__Type_II_REases	582	defense-finder-models/RM/RM/RM_Type_II	UserReplicon_RM_Type_II_3	1	1	1	2	1	RM_Type_II__Type_II_REases	mandatory	388	1.8e-28	98	1.355	0.985	6	387
Bacteria	WP_006847035.1	GCF_000157935.1	Bacteroidota	RM_Type_II__Type_II_MTases	583	defense-finder-models/RM/RM/RM_Type_II	UserReplicon_RM_Type_II_3	1	1	1	2	1	RM_Type_II__Type_II_MTases	mandatory	391	5.8e-92	305.7	0.795	0.831	3	327
Bacteria	WP_006847089.1	GCF_000157935.1	Bacteroidota	RM_Type_III__Type_III_MTases	624	defense-finder-models/RM/RM/RM_Type_III	UserReplicon_RM_Type_III_11	1	1	1	2	1	RM_Type_III__Type_III_MTases	mandatory	818	1.9e-60	202.9	0.753	0.677	126	679
Bacteria	WP_006847090.1	GCF_000157935.1	Bacteroidota	RM_Type_III__Type_III_REases	625	defense-finder-models/RM/RM/RM_Type_III	UserReplicon_RM_Type_III_11	1	1	1	2	1	RM_Type_III__Type_III_REases	mandatory	839	6.1e-28	94.7	0.388	0.458	30	413
Bacteria	WP_006847108.1	GCF_000157935.1	Bacteroidota	RM_Type_II__Type_II_MTases	639	defense-finder-models/RM/RM/RM_Type_II	UserReplicon_RM_Type_II_4	1	1	1	2	1	RM_Type_II__Type_II_MTases	mandatory	435	6.5e-32	108.6	0.899	0.979	9	434
Bacteria	WP_006847111.1	GCF_000157935.1	Bacteroidota	RM_Type_II__Type_II_REases	642	defense-finder-models/RM/RM/RM_Type_II	UserReplicon_RM_Type_II_4	1	1	1	2	1	RM_Type_II__Type_II_REases	mandatory	237	1.5e-08	32.5	0.798	0.852	5	206
Bacteria	WP_006847190.1	GCF_000157935.1	Bacteroidota	RM_Type_IV__Type_IV_REases	689	defense-finder-models/RM/RM/RM_Type_IV	UserReplicon_RM_Type_IV_15	1	1	1	1	2	RM_Type_IV__Type_IV_REases	mandatory	364	1e-59	199.7	0.831	0.984	1	358
Bacteria	WP_006847191.1	GCF_000157935.1	Bacteroidota	RM_Type_IV__Type_IV_REases	690	defense-finder-models/RM/RM/RM_Type_IV	UserReplicon_RM_Type_IV_15	1	1	1	1	2	RM_Type_IV__Type_IV_REases	mandatory	398	1.2e-78	262.9	0.708	0.724	105	392
Bacteria	WP_006847224.1	GCF_000157935.1	Bacteroidota	AbiD__AbiD	713	defense-finder-models/DefenseFinder_1/AbiD/AbiD	UserReplicon_AbiD_2	1	1	1	1	1	AbiD__AbiD	mandatory	302	8.9e-72	239.5	0.916	0.96	7	296
Bacteria	WP_006847434.1	GCF_000157935.1	Bacteroidota	RM_Type_III__Type_III_REases	853	defense-finder-models/RM/RM/RM_Type_III	UserReplicon_RM_Type_III_12	1	1	1	2	1	RM_Type_III__Type_III_REases	mandatory	1044	3.2e-228	757.7	0.995	0.999	1	1043
Bacteria	WP_006847435.1	GCF_000157935.1	Bacteroidota	RM_Type_III__Type_III_MTases	854	defense-finder-models/RM/RM/RM_Type_III	UserReplicon_RM_Type_III_12	1	1	1	2	1	RM_Type_III__Type_III_MTases	mandatory	667	4.8e-155	515.4	0.967	0.978	2	653
Bacteria	WP_006847474.1	GCF_000157935.1	Bacteroidota	RM_Type_II__Type_II_MTases	880	defense-finder-models/RM/RM/RM_Type_II	UserReplicon_RM_Type_II_5	1	1	1	2	1	RM_Type_II__Type_II_MTases	mandatory	624	1.2e-73	245.8	0.975	0.981	12	623
Bacteria	WP_006847475.1	GCF_000157935.1	Bacteroidota	RM_Type_II__Type_II_REases	881	defense-finder-models/RM/RM/RM_Type_II	UserReplicon_RM_Type_II_5	1	1	1	2	1	RM_Type_II__Type_II_REases	mandatory	392	2.4e-20	71.4	0.874	0.875	41	383
Bacteria	WP_006847485.1	GCF_000157935.1	Bacteroidota	RM__Type_I_MTases	886	defense-finder-models/RM/RM/RM_Type_I	UserReplicon_RM_Type_I_1	1	1	1	2.5	1	RM__Type_I_MTases	mandatory	502	2.5e-168	558.5	0.982	0.978	11	501
Bacteria	WP_006847486.1	GCF_000157935.1	Bacteroidota	RM__Type_I_S	887	defense-finder-models/RM/RM/RM_Type_I	UserReplicon_RM_Type_I_1	1	1	1	2.5	1	RM__Type_I_S	accessory	373	1.8e-54	182.8	0.462	0.979	8	372
Bacteria	WP_006847487.1	GCF_000157935.1	Bacteroidota	RM__Type_I_REases	888	defense-finder-models/RM/RM/RM_Type_I	UserReplicon_RM_Type_I_1	1	1	1	2.5	1	RM__Type_I_REases	mandatory	1014	1.5e-229	762.3	0.993	0.972	6	991
Bacteria	WP_006847493.1	GCF_000157935.1	Bacteroidota	RM_Type_IV__Type_IV_REases	892	defense-finder-models/RM/RM/RM_Type_IV	UserReplicon_RM_Type_IV_16	1	1	1	1	1	RM_Type_IV__Type_IV_REases	mandatory	430	2.1e-59	199.4	0.62	0.935	4	405
Bacteria	WP_006848374.1	GCF_000157935.1	Bacteroidota	RM__Type_I_S	1493	defense-finder-models/RM/RM/RM_Type_I	UserReplicon_RM_Type_I_2	1	1	1	2.5	1	RM__Type_I_S	accessory	296	1.8e-32	110.2	0.321	0.892	2	265
Bacteria	WP_006848377.1	GCF_000157935.1	Bacteroidota	RM__Type_I_S	1495	defense-finder-models/RM/RM/RM_Type_I	UserReplicon_RM_Type_I_2	1	1	1	2.5	1	RM__Type_I_S	accessory	450	1.1e-57	193.5	0.543	0.902	44	449
Bacteria	WP_006848379.1	GCF_000157935.1	Bacteroidota	RM__Type_I_MTases	1497	defense-finder-models/RM/RM/RM_Type_I	UserReplicon_RM_Type_I_2	1	1	1	2.5	1	RM__Type_I_MTases	mandatory	477	1.9e-173	575.2	0.951	0.981	7	474
Bacteria	WP_006848380.1	GCF_000157935.1	Bacteroidota	RM__Type_I_REases	1498	defense-finder-models/RM/RM/RM_Type_I	UserReplicon_RM_Type_I_2	1	1	1	2.5	1	RM__Type_I_REases	mandatory	905	9.4e-131	435.1	0.603	0.703	1	636
Bacteria	WP_006848569.1	GCF_000157935.1	Bacteroidota	ShosTA__ShosT	1620	defense-finder-models/DefenseFinder_2/ShosTA/ShosTA	UserReplicon_ShosTA_2	1	1	1	2	2	ShosTA__ShosT	mandatory	178	3e-09	34.3	0.304	0.348	110	171
Bacteria	WP_006848570.1	GCF_000157935.1	Bacteroidota	ShosTA__ShosT	1621	defense-finder-models/DefenseFinder_2/ShosTA/ShosTA	UserReplicon_ShosTA_2	1	1	1	2	2	ShosTA__ShosT	mandatory	193	2.5e-09	34.5	0.342	0.368	122	192
Bacteria	WP_006848571.1	GCF_000157935.1	Bacteroidota	ShosTA__ShosT	1622	defense-finder-models/DefenseFinder_2/ShosTA/ShosTA	UserReplicon_ShosTA_2	1	1	1	2	2	ShosTA__ShosT	mandatory	232	6.1e-14	49.6	0.599	0.625	43	187
Bacteria	WP_006848572.1	GCF_000157935.1	Bacteroidota	ShosTA__ShosA	1623	defense-finder-models/DefenseFinder_2/ShosTA/ShosTA	UserReplicon_ShosTA_2	1	1	1	2	2	ShosTA__ShosA	mandatory	321	4.6e-67	223.6	0.878	0.879	5	286
Bacteria	WP_006848584.1	GCF_000157935.1	Bacteroidota	Gabija__GajB_2	1632	defense-finder-models/DefenseFinder_1/Gabija/Gabija	UserReplicon_Gabija_6	1	1	1	2	1	Gabija__GajB_1	mandatory	670	4.1e-52	174.9	0.765	0.963	10	654
Bacteria	WP_006848585.1	GCF_000157935.1	Bacteroidota	Gabija__GajA	1633	defense-finder-models/DefenseFinder_1/Gabija/Gabija	UserReplicon_Gabija_6	1	1	1	2	1	Gabija__GajA	mandatory	585	2.2e-90	301.6	0.985	0.997	1	583
Bacteria	WP_006848585.1	GCF_000157935.1	Bacteroidota	Septu__PtuA	1633	defense-finder-models/DefenseFinder_2/Septu/Septu	UserReplicon_Septu_1	1	1	1	2	2	Septu__PtuA	mandatory	585	1.8e-25	88	0.738	0.573	1	335
Bacteria	WP_006848587.1	GCF_000157935.1	Bacteroidota	Septu__PtuB_2	1635	defense-finder-models/DefenseFinder_2/Septu/Septu	UserReplicon_Septu_1	1	1	1	2	2	Septu__PtuB	mandatory	342	8.4e-30	101.8	0.724	0.699	100	338
Bacteria	WP_006848597.1	GCF_000157935.1	Bacteroidota	Septu__PtuB_2	1640	defense-finder-models/DefenseFinder_2/Septu/Septu	UserReplicon_Septu_1	1	1	1	2	2	Septu__PtuB	mandatory	340	1.4e-41	140.4	0.945	0.879	41	339
Bacteria	WP_006848873.1	GCF_000157935.1	Bacteroidota	RM_Type_IIG__Type_IIG	1836	defense-finder-models/RM/RM/RM_Type_IIG	UserReplicon_RM_Type_IIG_7	1	1	1	1	1	RM_Type_IIG__Type_IIG	mandatory	1297	4.2e-99	330.6	0.946	0.854	20	1126
Bacteria	WP_006849279.1	GCF_000157935.1	Bacteroidota	RM_Type_IIG__Type_IIG	2101	defense-finder-models/RM/RM/RM_Type_IIG	UserReplicon_RM_Type_IIG_8	1	1	1	1	1	RM_Type_IIG__Type_IIG	mandatory	881	1.6e-185	616.4	0.66	0.992	4	877
Bacteria	WP_006849385.1	GCF_000157935.1	Bacteroidota	Rst_PARIS__DUF4435	2170	defense-finder-models/DefenseFinder_3/Rst_PARIS/PARIS_II	UserReplicon_PARIS_II_2	1	1	1	2	1	Rst_PARIS__DUF4435	mandatory	332	8.1e-76	252.4	1	0.753	27	276
Bacteria	WP_006849386.1	GCF_000157935.1	Bacteroidota	PARIS_II__AAA_21	2171	defense-finder-models/DefenseFinder_3/Rst_PARIS/PARIS_II	UserReplicon_PARIS_II_2	1	1	1	2	1	PARIS_II__AAA_21	mandatory	271	3.1e-19	67.2	0.253	0.28	180	255
Bacteria	WP_006849536.1	GCF_000157935.1	Bacteroidota	AbiD__AbiD	2258	defense-finder-models/DefenseFinder_1/AbiD/AbiD	UserReplicon_AbiD_3	1	1	1	1	1	AbiD__AbiD	mandatory	300	1.4e-75	252	0.916	0.967	7	296
Bacteria	WP_007485423.1	GCF_000011065.1	Bacteroidota	ShosTA__ShosA	193	defense-finder-models/DefenseFinder_2/ShosTA/ShosTA	UserReplicon_ShosTA_1	1	1	1	2	1	ShosTA__ShosA	mandatory	162	6.7e-06	23.5	0.366	0.71	47	161
Bacteria	WP_007485431.1	GCF_000011065.1	Bacteroidota	ShosTA__ShosT	197	defense-finder-models/DefenseFinder_2/ShosTA/ShosTA	UserReplicon_ShosTA_1	1	1	1	2	1	ShosTA__ShosT	mandatory	306	1e-11	43.1	0.81	0.549	135	302
Bacteria	WP_007831053.1	GCF_013009555.1	Bacteroidota	RM__Type_I_REases	562	defense-finder-models/RM/RM/RM_Type_I	UserReplicon_RM_Type_I_1	1	1	1	2.5	1	RM__Type_I_REases	mandatory	1343	1.2e-236	786	0.976	0.721	6	973
Bacteria	WP_007831055.1	GCF_013009555.1	Bacteroidota	RM__Type_I_S	564	defense-finder-models/RM/RM/RM_Type_I	UserReplicon_RM_Type_I_1	1	1	1	2.5	1	RM__Type_I_S	accessory	423	2.3e-84	282.2	0.561	0.986	4	420
Bacteria	WP_007831056.1	GCF_013009555.1	Bacteroidota	RM__Type_I_MTases	565	defense-finder-models/RM/RM/RM_Type_I	UserReplicon_RM_Type_I_1	1	1	1	2.5	1	RM__Type_I_MTases	mandatory	658	4.7e-216	717	1.281	0.994	3	656
Bacteria	WP_007831913.1	GCF_013009555.1	Bacteroidota	DRT_3__drt3a	865	defense-finder-models/DefenseFinder_2/DRT/DRT_3	UserReplicon_DRT_3_1	1	1	1	2	1	DRT_3__drt3a	mandatory	480	3.1e-38	130.4	0.35	0.685	98	426
Bacteria	WP_007831916.1	GCF_013009555.1	Bacteroidota	DRT_3__drt3b	866	defense-finder-models/DefenseFinder_2/DRT/DRT_3	UserReplicon_DRT_3_1	1	1	1	2	1	DRT_3__drt3b	mandatory	753	7.7e-85	283.9	0.853	0.826	91	712
Bacteria	WP_007831975.1	GCF_013009555.1	Bacteroidota	RM__Type_I_REases	883	defense-finder-models/RM/RM/RM_Type_I	UserReplicon_RM_Type_I_2	1	1	0.667	2	1	RM__Type_I_REases	mandatory	900	3.7e-130	433.8	0.583	0.682	1	614
Bacteria	WP_007831976.1	GCF_013009555.1	Bacteroidota	RM__Type_I_MTases	884	defense-finder-models/RM/RM/RM_Type_I	UserReplicon_RM_Type_I_2	1	1	0.667	2	1	RM__Type_I_MTases	mandatory	472	6.9e-170	564	0.955	0.985	7	471
Bacteria	WP_007833438.1	GCF_013009555.1	Bacteroidota	Menshen__NsnA	1393	defense-finder-models/DefenseFinder_4/Menshen/Menshen	UserReplicon_Menshen_1	1	1	0.667	2	1	Menshen__NsnA	mandatory	375	1.2e-126	420.9	0.945	0.979	8	374
Bacteria	WP_007833439.1	GCF_013009555.1	Bacteroidota	Menshen__NsnB	1394	defense-finder-models/DefenseFinder_4/Menshen/Menshen	UserReplicon_Menshen_1	1	1	0.667	2	1	Menshen__NsnB	mandatory	377	4.9e-98	326.9	0.994	0.995	1	375
Bacteria	WP_007833444.1	GCF_013009555.1	Bacteroidota	RM__Type_I_REases	1395	defense-finder-models/RM/RM/RM_Type_I	UserReplicon_RM_Type_I_3	1	1	1	2.5	1	RM__Type_I_REases	mandatory	942	2.3e-138	461.1	0.446	0.477	1	449
Bacteria	WP_007833446.1	GCF_013009555.1	Bacteroidota	RM__Type_I_MTases	1397	defense-finder-models/RM/RM/RM_Type_I	UserReplicon_RM_Type_I_3	1	1	1	2.5	1	RM__Type_I_MTases	mandatory	517	3.8e-175	581.6	0.992	0.994	2	515
Bacteria	WP_007833452.1	GCF_013009555.1	Bacteroidota	RM__Type_I_S	1401	defense-finder-models/RM/RM/RM_Type_I	UserReplicon_RM_Type_I_3	1	1	1	2.5	1	RM__Type_I_S	accessory	173	4.1e-17	60.5	0.211	0.855	25	172
Bacteria	WP_007833453.1	GCF_013009555.1	Bacteroidota	RM__Type_I_S	1402	defense-finder-models/RM/RM/RM_Type_I	UserReplicon_RM_Type_I_3	1	1	1	2.5	1	RM__Type_I_S	accessory	147	1.6e-22	78.1	0.187	0.912	11	144
Bacteria	WP_007835194.1	GCF_013009555.1	Bacteroidota	RM_Type_II__Type_II_MTases	2059	defense-finder-models/RM/RM/RM_Type_II	UserReplicon_RM_Type_II_4	1	1	1	2	2	RM_Type_II__Type_II_MTases	mandatory	436	1.1e-74	249.9	0.989	0.986	3	432
Bacteria	WP_007835195.1	GCF_013009555.1	Bacteroidota	RM_Type_II__Type_II_REases	2060	defense-finder-models/RM/RM/RM_Type_II	UserReplicon_RM_Type_II_4	1	1	1	2	2	RM_Type_II__Type_II_REases	mandatory	490	4.8e-18	63.9	1.141	0.741	30	392
Bacteria	WP_007835197.1	GCF_013009555.1	Bacteroidota	RM_Type_II__Type_II_REases	2061	defense-finder-models/RM/RM/RM_Type_II	UserReplicon_RM_Type_II_4	1	1	1	2	2	RM_Type_II__Type_II_REases	mandatory	945	5.2e-178	591.8	2.794	0.92	70	938
Bacteria	WP_007835283.1	GCF_013009555.1	Bacteroidota	Mokosh_TypeI__MkoA	2090	defense-finder-models/DefenseFinder_4/Mokosh/Mokosh_TypeI	UserReplicon_Mokosh_TypeI_2	1	1	1	2	1	Mokosh_TypeI__MkoA	mandatory	1327	4e-110	367.6	0.463	0.401	785	1316
Bacteria	WP_007835285.1	GCF_013009555.1	Bacteroidota	Mokosh_TypeI__MkoB	2091	defense-finder-models/DefenseFinder_4/Mokosh/Mokosh_TypeI	UserReplicon_Mokosh_TypeI_2	1	1	1	2	1	Mokosh_TypeI__MkoB	mandatory	800	1.1e-09	36	0.652	0.517	80	493
Bacteria	WP_007836159.1	GCF_013009555.1	Bacteroidota	Rst_PARIS__DUF4435	2382	defense-finder-models/DefenseFinder_3/Rst_PARIS/PARIS_I	UserReplicon_PARIS_I_1	1	1	1	2	1	Rst_PARIS__DUF4435	mandatory	331	1.5e-76	255.4	1	0.749	27	274
Bacteria	WP_007836180.1	GCF_000011065.1	Bacteroidota	PARIS_I__AAA_15	2388	defense-finder-models/DefenseFinder_3/Rst_PARIS/PARIS_I	UserReplicon_PARIS_I_1	1	1	1	2	1	PARIS_I__AAA_15	mandatory	521	1.1e-10	39.7	0.308	0.238	152	275
Bacteria	WP_007837383.1	GCF_013009555.1	Bacteroidota	RM_Type_II__Type_II_REases	2821	defense-finder-models/RM/RM/RM_Type_II	UserReplicon_RM_Type_II_5	1	1	1	2	1	RM_Type_II__Type_II_REases	mandatory	359	5.1e-36	123.1	1.29	0.942	16	353
Bacteria	WP_007837385.1	GCF_013009555.1	Bacteroidota	RM_Type_II__Type_II_MTases	2822	defense-finder-models/RM/RM/RM_Type_II	UserReplicon_RM_Type_II_5	1	1	1	2	1	RM_Type_II__Type_II_MTases	mandatory	370	4.3e-75	251.2	0.984	0.941	9	356
Bacteria	WP_007837560.1	GCF_013009555.1	Bacteroidota	Cas__cas9_II-A_II-B_II-C_1	2871	defense-finder-models/Cas/Cas/CAS_Class2-Subtype-II-C	UserReplicon_CAS_Class2-Subtype-II-C_1	1	1	0.667	2	1	Cas__cas9_II-A_II-B_II-C_1	mandatory	1504	1.4e-24	84.5	0.575	0.414	4	626
Bacteria	WP_007837565.1	GCF_013009555.1	Bacteroidota	Cas__cas1_I_II_III_IV_V_VI_5	2873	defense-finder-models/Cas/Cas/CAS_Class2-Subtype-II-C	UserReplicon_CAS_Class2-Subtype-II-C_1	1	1	0.667	2	1	Cas__cas1_I_II_III_IV_V_VI_5	accessory	310	1.3e-83	278.4	0.996	0.939	3	293
Bacteria	WP_007837814.1	GCF_013009555.1	Bacteroidota	AbiD__AbiD	2970	defense-finder-models/DefenseFinder_1/AbiD/AbiD	UserReplicon_AbiD_1	1	1	1	1	1	AbiD__AbiD	mandatory	307	1.9e-74	248.9	0.913	0.984	2	303
Bacteria	WP_007838229.1	GCF_013009555.1	Bacteroidota	RM_Type_II__Type_II_REases	3122	defense-finder-models/RM/RM/RM_Type_II	UserReplicon_RM_Type_II_6	1	1	1	2	1	RM_Type_II__Type_II_REases	mandatory	287	5.8e-07	28.1	0.592	0.833	48	286
Bacteria	WP_007838230.1	GCF_013009555.1	Bacteroidota	RM_Type_II__Type_II_MTases	3123	defense-finder-models/RM/RM/RM_Type_II	UserReplicon_RM_Type_II_6	1	1	1	2	1	RM_Type_II__Type_II_MTases	mandatory	408	1e-129	431	0.943	0.843	37	380
Bacteria	WP_007838706.1	GCF_013009555.1	Bacteroidota	CBASS__Cyclase_II	3320	defense-finder-models/DefenseFinder_5/CBASS/CBASS_I	UserReplicon_CBASS_I_2	1	1	1	2	1	CBASS__Cyclase_SMODS	mandatory	408	2.1e-57	192.7	0.905	0.868	8	361
Bacteria	WP_007838707.1	GCF_013009555.1	Bacteroidota	CBASS__Sensing_SAVED	3321	defense-finder-models/DefenseFinder_5/CBASS/CBASS_I	UserReplicon_CBASS_I_2	1	1	1	2	1	CBASS__Effector_2TM_S_2TMBeta	mandatory	375	2.9e-42	142.6	0.958	0.493	189	373
Bacteria	WP_007838872.1	GCF_013009555.1	Bacteroidota	Mokosh_TypeII__MkoC	3377	defense-finder-models/DefenseFinder_4/Mokosh/Mokosh_TypeII	UserReplicon_Mokosh_TypeII_3	1	1	1	1	1	Mokosh_TypeII__MkoC	mandatory	1155	2e-223	742.6	0.526	0.526	436	1042
Bacteria	WP_008023826.1	GCF_000210075.1	Bacteroidota	PsyrTA__PsyrT	1542	defense-finder-models/DefenseFinder_2/PsyrTA/PsyrTA	UserReplicon_PsyrTA_1	1	1	1	2	1	PsyrTA__PsyrT	mandatory	641	8e-22	75.1	0.594	0.647	29	443
Bacteria	WP_008023845.1	GCF_000210075.1	Bacteroidota	PsyrTA__PsyrA	1543	defense-finder-models/DefenseFinder_2/PsyrTA/PsyrTA	UserReplicon_PsyrTA_1	1	1	1	2	1	PsyrTA__PsyrA	mandatory	177	0.0001	19.4	0.151	0.345	11	71
Bacteria	WP_008641200.1	GCF_000210075.1	Bacteroidota	Septu__PtuA	1709	defense-finder-models/DefenseFinder_2/Septu/Septu	UserReplicon_Septu_2	1	1	1	2	1	Septu__PtuA	mandatory	411	4e-57	192.9	0.929	0.934	5	388
Bacteria	WP_008641201.1	GCF_000210075.1	Bacteroidota	Septu__PtuB	1710	defense-finder-models/DefenseFinder_2/Septu/Septu	UserReplicon_Septu_2	1	1	1	2	1	Septu__PtuB	mandatory	213	1.8e-25	88.5	0.841	0.761	1	162
Bacteria	WP_008765958.1	GCF_000210075.1	Bacteroidota	AbiH__AbiH	2075	defense-finder-models/DefenseFinder_1/AbiH/AbiH	UserReplicon_AbiH_1	1	1	1	1	1	AbiH__AbiH	mandatory	373	4.5e-26	90.3	0.954	0.764	9	293
Bacteria	WP_008766276.1	GCF_000011065.1	Bacteroidota	RM_Type_IIG__Type_IIG	1935	defense-finder-models/RM/RM/RM_Type_IIG	UserReplicon_RM_Type_IIG_2	1	1	1	1	1	RM_Type_IIG__Type_IIG	mandatory	1176	2.6e-138	461.1	0.871	0.965	41	1175
Bacteria	WP_009016532.1	GCF_000012845.1	Bacteroidota	RM_Type_II__Type_II_REases	1958	defense-finder-models/RM/RM/RM_Type_II	UserReplicon_RM_Type_II_1	1	1	1	2	1	RM_Type_II__Type_II_REases	mandatory	383	7.1e-75	250.9	1.363	0.896	8	350
Bacteria	WP_009016533.1	GCF_000012845.1	Bacteroidota	RM_Type_II__Type_II_MTases	1959	defense-finder-models/RM/RM/RM_Type_II	UserReplicon_RM_Type_II_1	1	1	1	2	1	RM_Type_II__Type_II_MTases	mandatory	425	6.4e-44	148.3	0.839	0.951	12	415
Bacteria	WP_009040026.1	GCF_000011065.1	Bacteroidota	Gao_Tmn__TmnA	2482	defense-finder-models/DefenseFinder_1/Gao_Tmn/Gao_Tmn	UserReplicon_Gao_Tmn_1	1	1	1	1	1	Gao_Tmn__TmnA	mandatory	1222	1.3e-64	216.4	0.514	0.537	19	674
Bacteria	WP_009088340.1	GCF_002023665.2	Bacteroidota	RM_Type_II__Type_II_REases	1738	defense-finder-models/RM/RM/RM_Type_II	UserReplicon_RM_Type_II_1	1	1	1	2	1	RM_Type_II__Type_II_REases	mandatory	367	2.1e-12	45.5	0.947	0.744	8	280
Bacteria	WP_009088342.1	GCF_002023665.2	Bacteroidota	RM_Type_II__Type_II_MTases	1739	defense-finder-models/RM/RM/RM_Type_II	UserReplicon_RM_Type_II_1	1	1	1	2	1	RM_Type_II__Type_II_MTases	mandatory	350	5.4e-90	300	0.975	0.986	4	348
Bacteria	WP_009092137.1	GCF_002023665.2	Bacteroidota	PD-T7-2__PD-T7-2_A	3063	defense-finder-models/DefenseFinder_3/PD-T7-2/PD-T7-2	UserReplicon_PD-T7-2_1	1	1	1	2	1	PD-T7-2__PD-T7-2_A	mandatory	340	1.7e-83	278.2	0.948	0.991	3	339
Bacteria	WP_009092139.1	GCF_002023665.2	Bacteroidota	PD-T7-2__PD-T7-2_B	3064	defense-finder-models/DefenseFinder_3/PD-T7-2/PD-T7-2	UserReplicon_PD-T7-2_1	1	1	1	2	1	PD-T7-2__PD-T7-2_B	mandatory	569	4.6e-203	673.4	0.976	0.995	1	566
Bacteria	WP_009092170.1	GCF_002023665.2	Bacteroidota	Gabija__GajB_1	3077	defense-finder-models/DefenseFinder_1/Gabija/Gabija	UserReplicon_Gabija_1	1	1	1	2	1	Gabija__GajB_1	mandatory	559	1.9e-87	291.8	0.929	0.962	8	545
Bacteria	WP_009092172.1	GCF_002023665.2	Bacteroidota	Gabija__GajA	3078	defense-finder-models/DefenseFinder_1/Gabija/Gabija	UserReplicon_Gabija_1	1	1	1	2	1	Gabija__GajA	mandatory	693	7.9e-114	379.3	0.989	1	1	693
Bacteria	WP_010992295.1	GCF_000025985.1	Bacteroidota	RM__Type_I_MTases	2703	defense-finder-models/RM/RM/RM_Type_I	UserReplicon_RM_Type_I_1	1	1	1	2.5	1	RM__Type_I_MTases	mandatory	890	7.8e-143	474.9	0.992	0.998	2	889
Bacteria	WP_010992296.1	GCF_000025985.1	Bacteroidota	RM__Type_I_S	2704	defense-finder-models/RM/RM/RM_Type_I	UserReplicon_RM_Type_I_1	1	1	1	2.5	1	RM__Type_I_S	accessory	394	3.6e-67	224.7	0.582	0.982	7	393
Bacteria	WP_010992297.1	GCF_000025985.1	Bacteroidota	RM__Type_I_REases	2705	defense-finder-models/RM/RM/RM_Type_I	UserReplicon_RM_Type_I_1	1	1	1	2.5	1	RM__Type_I_REases	mandatory	1064	3e-208	692.4	0.984	0.976	8	1045
Bacteria	WP_010992299.1	GCF_000025985.1	Bacteroidota	AbiH__AbiH	2707	defense-finder-models/DefenseFinder_1/AbiH/AbiH	UserReplicon_AbiH_1	1	1	1	1	1	AbiH__AbiH	mandatory	415	5.5e-32	109.6	0.981	0.877	4	367
Bacteria	WP_010992315.1	GCF_000025985.1	Bacteroidota	Gabija__GajA	2714	defense-finder-models/DefenseFinder_1/Gabija/Gabija	UserReplicon_Gabija_3	1	1	1	2	1	Gabija__GajA	mandatory	691	3.8e-108	360.7	0.995	0.912	1	630
Bacteria	WP_010992316.1	GCF_000025985.1	Bacteroidota	Gabija__GajB_2	2715	defense-finder-models/DefenseFinder_1/Gabija/Gabija	UserReplicon_Gabija_3	1	1	1	2	1	Gabija__GajB_1	mandatory	592	2.5e-89	298.3	0.739	0.963	8	577
Bacteria	WP_010992317.1	GCF_000025985.1	Bacteroidota	Tiamat__TmtA_2639564464	2716	defense-finder-models/DefenseFinder_5/Tiamat/Tiamat	UserReplicon_Tiamat_2	1	1	1	1	1	Tiamat__TmtA	mandatory	1094	7.4e-262	869.9	0.997	0.992	8	1092
Bacteria	WP_010992331.1	GCF_000025985.1	Bacteroidota	RM_Type_III__Type_III_MTases	2726	defense-finder-models/RM/RM/RM_Type_III	UserReplicon_RM_Type_III_5	1	1	1	2	1	RM_Type_III__Type_III_MTases	mandatory	635	6.6e-193	641	0.94	0.943	12	610
Bacteria	WP_010992333.1	GCF_000025985.1	Bacteroidota	RM_Type_III__Type_III_REases	2728	defense-finder-models/RM/RM/RM_Type_III	UserReplicon_RM_Type_III_5	1	1	1	2	1	RM_Type_III__Type_III_REases	mandatory	1020	6e-221	734.2	0.996	0.999	1	1019
Bacteria	WP_010992402.1	GCF_000025985.1	Bacteroidota	RM_Type_IIG__Type_IIG	2780	defense-finder-models/RM/RM/RM_Type_IIG	UserReplicon_RM_Type_IIG_4	1	1	1	1	1	RM_Type_IIG__Type_IIG	mandatory	1016	3.6e-182	606.1	1.002	0.961	35	1010
Bacteria	WP_010992700.1	GCF_000025985.1	Bacteroidota	RM__Type_I_REases	2967	defense-finder-models/RM/RM/RM_Type_I	UserReplicon_RM_Type_I_2	1	1	1	2.5	1	RM__Type_I_REases	mandatory	921	5.3e-199	661.8	0.908	0.946	1	871
Bacteria	WP_010992702.1	GCF_000025985.1	Bacteroidota	RM__Type_I_MTases	2969	defense-finder-models/RM/RM/RM_Type_I	UserReplicon_RM_Type_I_2	1	1	1	2.5	1	RM__Type_I_MTases	mandatory	513	1.4e-172	573	0.996	0.996	1	511
Bacteria	WP_010992705.1	GCF_000025985.1	Bacteroidota	RM__Type_I_S	2970	defense-finder-models/RM/RM/RM_Type_I	UserReplicon_RM_Type_I_2	1	1	1	2.5	1	RM__Type_I_S	accessory	209	3.2e-28	96.2	0.279	0.909	19	208
Bacteria	WP_010992706.1	GCF_000025985.1	Bacteroidota	RM__Type_I_S	2971	defense-finder-models/RM/RM/RM_Type_I	UserReplicon_RM_Type_I_2	1	1	1	2.5	1	RM__Type_I_S	accessory	376	4.7e-34	115.5	0.561	0.979	8	375
Bacteria	WP_010993063.1	GCF_000025985.1	Bacteroidota	Cas__cas2_I_II_III_IV_V_VI_3	3231	defense-finder-models/Cas/Cas/CAS_Cluster	UserReplicon_CAS_Cluster_1	1	1	0.04	2	1	Cas__cas2_I_II_III_IV_V_VI_1	mandatory	87	9.5e-24	81.4	0.987	0.885	3	79
Bacteria	WP_010993064.1	GCF_000025985.1	Bacteroidota	Cas__cas6_I_II_III_IV_V_VI_7	3232	defense-finder-models/Cas/Cas/CAS_Cluster	UserReplicon_CAS_Cluster_1	1	1	0.04	2	1	Cas__cas6_I_II_III_IV_V_VI_7	mandatory	223	1e-24	85.9	0.974	0.807	42	221
Bacteria	WP_010993405.1	GCF_000025985.1	Bacteroidota	RM_Type_II__Type_II_MTases	3482	defense-finder-models/RM/RM/RM_Type_II	UserReplicon_RM_Type_II_3	1	1	1	2	1	RM_Type_II__Type_II_MTases	mandatory	286	6.9e-89	295.9	0.691	0.92	6	268
Bacteria	WP_010993406.1	GCF_000025985.1	Bacteroidota	RM_Type_II__Type_II_REases	3483	defense-finder-models/RM/RM/RM_Type_II	UserReplicon_RM_Type_II_3	1	1	1	2	1	RM_Type_II__Type_II_REases	mandatory	374	6.7e-17	60.6	0.866	0.858	49	369
Bacteria	WP_011108574.1	GCF_000011065.1	Bacteroidota	Rst_TIR-NLR__TIR	3552	defense-finder-models/DefenseFinder_1/Rst_TIR-NLR/Rst_TIR-NLR	UserReplicon_Rst_TIR-NLR_2	1	1	1	1	1	Rst_TIR-NLR__TIR	mandatory	759	3.5e-74	248.8	0.893	0.967	6	739
Bacteria	WP_011109062.1	GCF_000011065.1	Bacteroidota	RM_Type_IIG__Type_IIG	3910	defense-finder-models/RM/RM/RM_Type_IIG	UserReplicon_RM_Type_IIG_3	1	1	1	1	1	RM_Type_IIG__Type_IIG	mandatory	1332	1.9e-189	630	0.781	0.992	9	1329
Bacteria	WP_011109304.1	GCF_000011065.1	Bacteroidota	RM__Type_I_REases	4083	defense-finder-models/RM/RM/RM_Type_I	UserReplicon_RM_Type_I_1	1	1	1	2.5	2	RM__Type_I_REases	mandatory	901	9.4e-131	435.8	0.599	0.7	1	631
Bacteria	WP_011109305.1	GCF_000011065.1	Bacteroidota	RM__Type_I_MTases	4084	defense-finder-models/RM/RM/RM_Type_I	UserReplicon_RM_Type_I_1	1	1	1	2.5	2	RM__Type_I_MTases	mandatory	472	2.6e-168	558.9	0.955	0.985	7	471
Bacteria	WP_011109307.1	GCF_000011065.1	Bacteroidota	RM__Type_I_S	4086	defense-finder-models/RM/RM/RM_Type_I	UserReplicon_RM_Type_I_1	1	1	1	2.5	2	RM__Type_I_S	accessory	474	1.6e-49	167	0.549	0.859	66	472
Bacteria	WP_011109314.1	GCF_000011065.1	Bacteroidota	RM__Type_I_REases	4090	defense-finder-models/RM/RM/RM_Type_I	UserReplicon_RM_Type_I_1	1	1	1	2.5	2	RM__Type_I_REases	mandatory	942	4.4e-138	460.3	0.45	0.481	1	453
Bacteria	WP_011109317.1	GCF_000011065.1	Bacteroidota	RM__Type_I_MTases	4093	defense-finder-models/RM/RM/RM_Type_I	UserReplicon_RM_Type_I_1	1	1	1	2.5	2	RM__Type_I_MTases	mandatory	517	2.1e-175	582.5	0.992	0.994	2	515
Bacteria	WP_011109319.1	GCF_000011065.1	Bacteroidota	RM__Type_I_S	4094	defense-finder-models/RM/RM/RM_Type_I	UserReplicon_RM_Type_I_1	1	1	1	2.5	2	RM__Type_I_S	accessory	428	5.9e-49	164.8	0.564	0.909	39	427
Bacteria	WP_011109322.1	GCF_000011065.1	Bacteroidota	RM__Type_I_S	4096	defense-finder-models/RM/RM/RM_Type_I	UserReplicon_RM_Type_I_1	1	1	1	2.5	2	RM__Type_I_S	accessory	381	8.3e-33	112.3	0.476	0.942	14	372
Bacteria	WP_011963348.1	GCF_002217405.1	Bacteroidota	Lamassu-Fam__LmuA_effector_Protease	491	defense-finder-models/DefenseFinder_1/Lamassu-Fam/Lamassu-Fam	UserReplicon_Lamassu-Fam_3	1	1	0.667	2	1	Lamassu-Fam__LmuA_effector_Cap4_nuclease_II	mandatory	461	1.6e-09	34.5	0.612	0.525	97	338
Bacteria	WP_011963352.1	GCF_002217405.1	Bacteroidota	Lamassu-Fam__LmuB_SMC_Hydrolase_protease	494	defense-finder-models/DefenseFinder_1/Lamassu-Fam/Lamassu-Fam	UserReplicon_Lamassu-Fam_3	1	1	0.667	2	1	Lamassu-Fam__LmuB_SMC_Cap4_nuclease_II	mandatory	259	2e-06	23.2	0.222	0.591	21	173
Bacteria	WP_011965808.1	GCF_000012825.1	Bacteroidota	AbiD__AbiD	3152	defense-finder-models/DefenseFinder_1/AbiD/AbiD	UserReplicon_AbiD_1	1	1	1	1	1	AbiD__AbiD	mandatory	221	5e-53	178.4	0.598	0.873	26	218
Bacteria	WP_011966342.1	GCF_000012845.1	Bacteroidota	Cas__cas3_I_5	2583	defense-finder-models/Cas/Cas/CAS_Class1-Subtype-I-C	UserReplicon_CAS_Class1-Subtype-I-C_1	1	1	0.571	4	1	Cas__cas3_I_5	accessory	741	8.6e-58	194	0.602	0.628	142	606
Bacteria	WP_011966343.1	GCF_000012845.1	Bacteroidota	Cas__cas5_I-C_5	2584	defense-finder-models/Cas/Cas/CAS_Class1-Subtype-I-C	UserReplicon_CAS_Class1-Subtype-I-C_1	1	1	0.571	4	1	Cas__cas5_I-C_11	mandatory	226	6.1e-72	239.4	0.995	0.925	9	217
Bacteria	WP_011966345.1	GCF_000012845.1	Bacteroidota	Cas__cas7_I-C_7	2585	defense-finder-models/Cas/Cas/CAS_Class1-Subtype-I-C	UserReplicon_CAS_Class1-Subtype-I-C_1	1	1	0.571	4	1	Cas__cas7_I-C_13	mandatory	283	1.7e-117	389.4	0.996	0.972	7	281
Bacteria	WP_011966346.1	GCF_000012845.1	Bacteroidota	Cas__cas4_I_II_III_IV_V_VI_6	2586	defense-finder-models/Cas/Cas/CAS_Class1-Subtype-I-C	UserReplicon_CAS_Class1-Subtype-I-C_1	1	1	0.571	4	1	Cas__cas4_I_II_III_IV_V_VI_1	accessory	221	1.7e-35	120.4	0.994	0.873	10	202
Bacteria	WP_011966488.1	GCF_000012845.1	Bacteroidota	RM_Type_IIG__Type_IIG	2699	defense-finder-models/RM/RM/RM_Type_IIG	UserReplicon_RM_Type_IIG_3	1	1	1	1	1	RM_Type_IIG__Type_IIG	mandatory	1664	0	1034.2	1.243	0.998	2	1662
Bacteria	WP_011966710.1	GCF_000012845.1	Bacteroidota	RM_Type_III__Type_III_MTases	2884	defense-finder-models/RM/RM/RM_Type_III	UserReplicon_RM_Type_III_4	1	1	1	2	1	RM_Type_III__Type_III_MTases	mandatory	602	1.6e-103	345.6	0.68	0.698	32	451
Bacteria	WP_011966711.1	GCF_000012845.1	Bacteroidota	RM_Type_III__Type_III_REases	2885	defense-finder-models/RM/RM/RM_Type_III	UserReplicon_RM_Type_III_4	1	1	1	2	1	RM_Type_III__Type_III_REases	mandatory	781	7.1e-35	118.1	0.419	0.496	14	400
Bacteria	WP_011967236.1	GCF_000012845.1	Bacteroidota	RM_Type_II__Type_II_MTases	3306	defense-finder-models/RM/RM/RM_Type_II	UserReplicon_RM_Type_II_2	1	1	1	2	2	RM_Type_II__Type_II_MTases	mandatory	315	3e-71	237.9	0.661	0.797	36	286
Bacteria	WP_011967237.1	GCF_000012845.1	Bacteroidota	RM_Type_II__Type_II_REases	3307	defense-finder-models/RM/RM/RM_Type_II	UserReplicon_RM_Type_II_2	1	1	1	2	2	RM_Type_II__Type_II_REases	mandatory	277	5.4e-71	237.4	0.885	0.993	1	275
Bacteria	WP_011967238.1	GCF_000012845.1	Bacteroidota	RM_Type_II__Type_II_MTases	3308	defense-finder-models/RM/RM/RM_Type_II	UserReplicon_RM_Type_II_2	1	1	1	2	2	RM_Type_II__Type_II_MTases	mandatory	321	9.1e-140	463.3	0.904	0.991	1	318
Bacteria	WP_012055550.1	GCF_000012825.1	Bacteroidota	AbiH__AbiH	3217	defense-finder-models/DefenseFinder_1/AbiH/AbiH	UserReplicon_AbiH_2	1	1	1	1	1	AbiH__AbiH	mandatory	285	3.1e-14	51.4	0.468	0.463	95	226
Bacteria	WP_012055684.1	GCF_000012825.1	Bacteroidota	ShosTA__ShosT	3321	defense-finder-models/DefenseFinder_2/ShosTA/ShosTA	UserReplicon_ShosTA_2	1	1	1	2	1	ShosTA__ShosT	mandatory	646	3.1e-14	51.1	0.759	0.255	479	643
Bacteria	WP_012055687.1	GCF_000012825.1	Bacteroidota	ShosTA__ShosA	3324	defense-finder-models/DefenseFinder_2/ShosTA/ShosTA	UserReplicon_ShosTA_2	1	1	1	2	1	ShosTA__ShosA	mandatory	326	2.9e-67	224.7	0.875	0.847	5	280
Bacteria	WP_012055691.1	GCF_000012825.1	Bacteroidota	RM__Type_I_REases	3327	defense-finder-models/RM/RM/RM_Type_I	UserReplicon_RM_Type_I_1	1	1	1	2.5	1	RM__Type_I_REases	mandatory	1027	8.4e-239	793	0.952	0.939	46	1009
Bacteria	WP_012055693.1	GCF_000012825.1	Bacteroidota	RM__Type_I_S	3329	defense-finder-models/RM/RM/RM_Type_I	UserReplicon_RM_Type_I_1	1	1	1	2.5	1	RM__Type_I_S	accessory	430	3.1e-73	245.3	0.561	0.988	3	427
Bacteria	WP_012055694.1	GCF_000012825.1	Bacteroidota	RM__Type_I_MTases	3330	defense-finder-models/RM/RM/RM_Type_I	UserReplicon_RM_Type_I_1	1	1	1	2.5	1	RM__Type_I_MTases	mandatory	771	6.7e-240	795.6	1.279	0.995	2	768
Bacteria	WP_012055821.1	GCF_000012825.1	Bacteroidota	RM__Type_I_S	3412	defense-finder-models/RM/RM/RM_Type_I	UserReplicon_RM_Type_I_2	1	1	1	2.5	1	RM__Type_I_S	accessory	358	7.5e-27	92.4	0.473	0.916	23	350
Bacteria	WP_012055823.1	GCF_000012825.1	Bacteroidota	RM__Type_I_MTases	3414	defense-finder-models/RM/RM/RM_Type_I	UserReplicon_RM_Type_I_2	1	1	1	2.5	1	RM__Type_I_MTases	mandatory	517	5.1e-175	581	0.992	0.994	2	515
Bacteria	WP_012055824.1	GCF_000012825.1	Bacteroidota	RM__Type_I_REases	3415	defense-finder-models/RM/RM/RM_Type_I	UserReplicon_RM_Type_I_2	1	1	1	2.5	1	RM__Type_I_REases	mandatory	942	1.1e-137	458.8	0.45	0.481	1	453
Bacteria	WP_012055868.1	GCF_000012825.1	Bacteroidota	BREX__pglXI	3447	defense-finder-models/DefenseFinder_5/BREX/BREX_III	UserReplicon_BREX_III_1	1	1	0.429	3	1	BREX__pglXI	mandatory	881	5.9e-268	889.4	0.844	0.866	22	784
Bacteria	WP_012055870.1	GCF_000012825.1	Bacteroidota	BREX__brxHII	3449	defense-finder-models/DefenseFinder_5/BREX/BREX_III	UserReplicon_BREX_III_1	1	1	0.429	3	1	BREX__brxHII	mandatory	921	0	1047.1	0.988	0.998	2	920
Bacteria	WP_012055871.1	GCF_000012825.1	Bacteroidota	BREX__pglZ3	3450	defense-finder-models/DefenseFinder_5/BREX/BREX_III	UserReplicon_BREX_III_1	1	1	0.429	3	1	BREX__pglZB	mandatory	494	1.7e-60	202.8	0.515	0.662	168	494
Bacteria	WP_012055878.1	GCF_000012825.1	Bacteroidota	Azaca__ZacA	3456	defense-finder-models/DefenseFinder_3/Azaca/Azaca	UserReplicon_Azaca_1	1	1	1	3	1	Azaca__ZacA	mandatory	392	2e-82	275.5	0.98	0.982	3	387
Bacteria	WP_012055879.1	GCF_000012825.1	Bacteroidota	Azaca__ZacB	3457	defense-finder-models/DefenseFinder_3/Azaca/Azaca	UserReplicon_Azaca_1	1	1	1	3	1	Azaca__ZacB	mandatory	595	2.8e-129	430.3	0.986	0.983	7	591
Bacteria	WP_012055880.1	GCF_000012825.1	Bacteroidota	Azaca__ZacC	3458	defense-finder-models/DefenseFinder_3/Azaca/Azaca	UserReplicon_Azaca_1	1	1	1	3	1	Azaca__ZacC	mandatory	980	2.3e-267	888.2	0.99	0.996	2	977
Bacteria	WP_012457493.1	GCF_000010505.1	Bacteroidota	RM_Type_IIG__Type_IIG	656	defense-finder-models/RM/RM/RM_Type_IIG	UserReplicon_RM_Type_IIG_2	1	1	1	1	1	RM_Type_IIG__Type_IIG	mandatory	1324	2.4e-217	721	0.784	0.994	9	1324
Bacteria	WP_012457626.1	GCF_000010505.1	Bacteroidota	PD-T7-1__PD-T7-1	741	defense-finder-models/DefenseFinder_4/PD-T7-1/PD-T7-1	UserReplicon_PD-T7-1_1	1	1	1	1	1	PD-T7-1__PD-T7-1	mandatory	460	3.1e-131	434.9	0.989	0.972	6	452
Bacteria	WP_012457835.1	GCF_000010505.1	Bacteroidota	RM_Type_III__Type_III_REases	900	defense-finder-models/RM/RM/RM_Type_III	UserReplicon_RM_Type_III_3	1	1	1	2	1	RM_Type_III__Type_III_REases	mandatory	913	2.5e-92	307.2	0.829	0.903	36	859
Bacteria	WP_012457836.1	GCF_000010505.1	Bacteroidota	RM_Type_III__Type_III_MTases	901	defense-finder-models/RM/RM/RM_Type_III	UserReplicon_RM_Type_III_3	1	1	1	2	1	RM_Type_III__Type_III_MTases	mandatory	544	1.6e-104	347.9	0.862	0.904	2	493
Bacteria	WP_012457934.1	GCF_000010505.1	Bacteroidota	RM_Type_IV__Type_IV_REases	968	defense-finder-models/RM/RM/RM_Type_IV	UserReplicon_RM_Type_IV_4	1	1	1	1	1	RM_Type_IV__Type_IV_REases	mandatory	305	3.5e-56	187.7	0.397	0.577	127	302
Bacteria	WP_012458151.1	GCF_000010505.1	Bacteroidota	Cas__cas13b_VI-B_1	1123	defense-finder-models/Cas/Cas/CAS_Class2-Subtype-VI-B	UserReplicon_CAS_Class2-Subtype-VI-B_5	1	1	1	2	1	Cas__cas13b_VI-B_1	mandatory	1135	1.3e-255	847.8	0.995	0.988	5	1125
Bacteria	WP_012458152.1	GCF_000010505.1	Bacteroidota	Cas__tm_4_VI-B_1	1124	defense-finder-models/Cas/Cas/CAS_Class2-Subtype-VI-B	UserReplicon_CAS_Class2-Subtype-VI-B_5	1	1	1	2	1	Cas__tm_4_VI-B_1	accessory	238	6.6e-96	317.5	1	0.992	1	236
Bacteria	WP_012458414.1	GCF_000010505.1	Bacteroidota	Cas__cas13b_VI-B_1	1292	defense-finder-models/Cas/Cas/CAS_Class2-Subtype-VI-B	UserReplicon_CAS_Class2-Subtype-VI-B_6	1	1	0.5	1	1	Cas__cas13b_VI-B_1	mandatory	1119	0	1447.5	0.999	0.999	1	1118
Bacteria	WP_012458601.1	GCF_000010505.1	Bacteroidota	RM_Type_II__Type_II_REases	1420	defense-finder-models/RM/RM/RM_Type_II	UserReplicon_RM_Type_II_1	1	1	1	2	1	RM_Type_II__Type_II_REases	mandatory	246	1.1e-49	166.8	0.637	0.996	1	245
Bacteria	WP_012458602.1	GCF_000010505.1	Bacteroidota	RM_Type_II__Type_II_MTases	1421	defense-finder-models/RM/RM/RM_Type_II	UserReplicon_RM_Type_II_1	1	1	1	2	1	RM_Type_II__Type_II_MTases	mandatory	279	4.7e-101	334.4	0.732	0.982	5	278
Bacteria	WP_012458611.1	GCF_000010505.1	Bacteroidota	Cas__cas2_I_II_III_IV_V_VI_3	1425	defense-finder-models/Cas/Cas/CAS_Class1-Subtype-III-B	UserReplicon_CAS_Class1-Subtype-III-B_2	1	1	0.857	6	1	Cas__cas2_I_II_III_IV_V_VI_3	accessory	96	6.2e-19	64.8	0.949	0.771	7	80
Bacteria	WP_012458613.1	GCF_000010505.1	Bacteroidota	Cas__RT_I_II_III_IV_V_VI_1	1426	defense-finder-models/Cas/Cas/CAS_Class1-Subtype-III-B	UserReplicon_CAS_Class1-Subtype-III-B_2	1	1	0.857	6	1	Cas__RT_I_II_III_IV_V_VI_1	neutral	762	2.9e-56	187.3	0.818	0.324	326	572
Bacteria	WP_012458614.1	GCF_000010505.1	Bacteroidota	Cas__cmr6gr7_III-B_2	1427	defense-finder-models/Cas/Cas/CAS_Class1-Subtype-III-B	UserReplicon_CAS_Class1-Subtype-III-B_2	1	1	0.857	6	1	Cas__cmr6gr7_III-B_1	mandatory	248	5.7e-61	202.7	0.995	0.883	25	243
Bacteria	WP_012458615.1	GCF_000010505.1	Bacteroidota	Cas__cmr5gr11_III-B_13	1428	defense-finder-models/Cas/Cas/CAS_Class1-Subtype-III-B	UserReplicon_CAS_Class1-Subtype-III-B_2	1	1	0.857	6	1	Cas__cmr5gr11_III-B_18	mandatory	145	8.9e-68	223.6	0.993	0.945	1	137
Bacteria	WP_012458616.1	GCF_000010505.1	Bacteroidota	Cas__cmr4gr7_III-B_III-C_2	1429	defense-finder-models/Cas/Cas/CAS_Class1-Subtype-III-B	UserReplicon_CAS_Class1-Subtype-III-B_2	1	1	0.857	6	1	Cas__cmr4gr7_III-B_III-C_2	accessory	233	2.8e-26	89.4	0.477	0.635	5	152
Bacteria	WP_012458617.1	GCF_000010505.1	Bacteroidota	Cas__cmr3gr5_III-B_III-C_4	1430	defense-finder-models/Cas/Cas/CAS_Class1-Subtype-III-B	UserReplicon_CAS_Class1-Subtype-III-B_2	1	1	0.857	6	1	Cas__cmr3gr5_III-B_III-C_5	accessory	393	1.1e-85	284.5	1	0.949	15	387
Bacteria	WP_012458619.1	GCF_000010505.1	Bacteroidota	Cas__cmr1gr7_III-B_2	1431	defense-finder-models/Cas/Cas/CAS_Class1-Subtype-III-B	UserReplicon_CAS_Class1-Subtype-III-B_2	1	1	0.857	6	1	Cas__cmr1gr7_III-B_1	mandatory	414	1.1e-94	314.5	0.997	0.886	1	367
Bacteria	WP_012458620.1	GCF_000010505.1	Bacteroidota	Cas__cmr1gr7_III-B_5	1432	defense-finder-models/Cas/Cas/CAS_Class1-Subtype-III-B	UserReplicon_CAS_Class1-Subtype-III-B_2	1	1	0.857	6	1	Cas__cmr1gr7_III-B_1	mandatory	78	4.9e-45	148.7	0.964	1	1	78
Bacteria	WP_012458621.1	GCF_000010505.1	Bacteroidota	Cas__corA_III-B_III-D_1	1433	defense-finder-models/Cas/Cas/CAS_Class1-Subtype-III-B	UserReplicon_CAS_Class1-Subtype-III-B_2	1	1	0.857	6	1	Cas__corA_III-B_III-D_1	neutral	527	1.9e-171	568.2	0.949	0.998	1	526
Bacteria	WP_012458642.1	GCF_000010505.1	Bacteroidota	Cas__cas2_I_II_III_IV_V_VI_5	1448	defense-finder-models/Cas/Cas/CAS_Class1-Subtype-I-B	UserReplicon_CAS_Class1-Subtype-I-B_1	1	1	1	8	1	Cas__cas2_I_II_III_IV_V_VI_3	accessory	87	5.8e-29	97.1	0.966	0.966	1	84
Bacteria	WP_012458643.1	GCF_000010505.1	Bacteroidota	Cas__cas1_I_II_III_IV_V_VI_7	1449	defense-finder-models/Cas/Cas/CAS_Class1-Subtype-I-B	UserReplicon_CAS_Class1-Subtype-I-B_1	1	1	1	8	1	Cas__cas1_I_II_III_IV_V_VI_7	accessory	338	4.1e-131	433.7	1	0.982	4	335
Bacteria	WP_012458644.1	GCF_000010505.1	Bacteroidota	Cas__cas4_I_II_III_IV_V_VI_6	1450	defense-finder-models/Cas/Cas/CAS_Class1-Subtype-I-B	UserReplicon_CAS_Class1-Subtype-I-B_1	1	1	1	8	1	Cas__cas4_I_II_III_IV_V_VI_6	accessory	169	1.4e-52	174.8	0.994	0.953	4	164
Bacteria	WP_012458645.1	GCF_000010505.1	Bacteroidota	Cas__cas7_I-B_14	1451	defense-finder-models/Cas/Cas/CAS_Class1-Subtype-I-B	UserReplicon_CAS_Class1-Subtype-I-B_1	1	1	1	8	1	Cas__cas7_I-B_6	mandatory	352	2.6e-183	605.8	1	1	1	352
Bacteria	WP_012458646.1	GCF_000010505.1	Bacteroidota	Cas__cas8b6_I-B_1	1452	defense-finder-models/Cas/Cas/CAS_Class1-Subtype-I-B	UserReplicon_CAS_Class1-Subtype-I-B_1	1	1	1	8	1	Cas__cas8b2_I-B_2	mandatory	431	4.1e-182	602.4	0.998	1	1	431
Bacteria	WP_012458647.1	GCF_000010505.1	Bacteroidota	Cas__cas3_I_5	1453	defense-finder-models/Cas/Cas/CAS_Class1-Subtype-I-B	UserReplicon_CAS_Class1-Subtype-I-B_1	1	1	1	8	1	Cas__cas3_I_5	accessory	706	2.7e-68	227.7	0.484	0.486	237	579
Bacteria	WP_012458648.1	GCF_000010505.1	Bacteroidota	Cas__cas5_I-B_20	1454	defense-finder-models/Cas/Cas/CAS_Class1-Subtype-I-B	UserReplicon_CAS_Class1-Subtype-I-B_1	1	1	1	8	1	Cas__cas5_I-B_6	mandatory	195	4.3e-93	307	0.984	0.974	5	194
Bacteria	WP_012458649.1	GCF_000010505.1	Bacteroidota	Cas__cas6_I_II_III_IV_V_VI_7	1455	defense-finder-models/Cas/Cas/CAS_Class1-Subtype-I-B	UserReplicon_CAS_Class1-Subtype-I-B_1	1	1	1	8	1	Cas__cas6_I-B_III_1	accessory	221	1.3e-30	104	0.995	0.833	38	221
Bacteria	WP_012458694.1	GCF_000010505.1	Bacteroidota	AbiL__AbiLii2	1488	defense-finder-models/DefenseFinder_1/AbiL/AbiL	UserReplicon_AbiL_1	1	1	1	2	1	AbiL__AbiLii	mandatory	232	4.9e-08	29.4	0.351	0.414	88	183
Bacteria	WP_012458695.1	GCF_000010505.1	Bacteroidota	AbiL__AbiLi2	1489	defense-finder-models/DefenseFinder_1/AbiL/AbiL	UserReplicon_AbiL_1	1	1	1	2	1	AbiL__AbiLi	mandatory	433	3.3e-31	105.7	0.273	0.309	292	425
Bacteria	WP_013446713.1	GCF_000252855.1	Bacteroidota	SoFic__SoFic	1418	defense-finder-models/DefenseFinder_5/SoFIC/SoFic	UserReplicon_SoFic_2	1	1	1	1	1	SoFic__SoFic	mandatory	353	2.7e-113	375.7	0.964	0.98	6	351
Bacteria	WP_013446805.1	GCF_000252855.1	Bacteroidota	RM_Type_IV__Type_IV_REases	1493	defense-finder-models/RM/RM/RM_Type_IV	UserReplicon_RM_Type_IV_7	1	1	1	1	1	RM_Type_IV__Type_IV_REases	mandatory	307	7.8e-46	153.7	0.39	0.56	129	300
Bacteria	WP_013447110.1	GCF_000252855.1	Bacteroidota	RM_Type_II__Type_II_REases	1749	defense-finder-models/RM/RM/RM_Type_II	UserReplicon_RM_Type_II_4	1	1	1	2	1	RM_Type_II__Type_II_REases	mandatory	278	6.3e-75	249.4	0.893	1	1	278
Bacteria	WP_013447111.1	GCF_000252855.1	Bacteroidota	RM_Type_II__Type_II_MTases	1750	defense-finder-models/RM/RM/RM_Type_II	UserReplicon_RM_Type_II_4	1	1	1	2	1	RM_Type_II__Type_II_MTases	mandatory	339	5.2e-148	489.5	0.907	0.938	1	318
Bacteria	WP_013447209.1	GCF_000252855.1	Bacteroidota	CapRel__CapRel	1828	defense-finder-models/DefenseFinder_3/CapRel/CapRel	UserReplicon_CapRel_1	1	1	1	1	1	CapRel__CapRel	mandatory	344	5.2e-49	164.1	0.955	0.968	1	333
Bacteria	WP_013447233.1	GCF_000252855.1	Bacteroidota	AbiD__AbiD	1847	defense-finder-models/DefenseFinder_1/AbiD/AbiD	UserReplicon_AbiD_1	1	1	1	1	1	AbiD__AbiD	mandatory	291	2e-49	165.5	0.858	0.935	6	277
Bacteria	WP_015530934.1	GCF_000210075.1	Bacteroidota	RloC__RloC	2435	defense-finder-models/DefenseFinder_1/RloC/RloC	UserReplicon_RloC_6	1	1	1	1	1	RloC__RloC	mandatory	735	4.5e-110	367.4	0.995	0.997	1	733
Bacteria	WP_015531081.1	GCF_000210075.1	Bacteroidota	AbiL__AbiLi2	2526	defense-finder-models/DefenseFinder_1/AbiL/AbiL	UserReplicon_AbiL_2	1	1	1	2	2	AbiL__AbiLi	mandatory	406	1.2e-34	118.3	0.292	0.337	261	397
Bacteria	WP_015531085.1	GCF_000210075.1	Bacteroidota	AbiL__AbiLi2	2528	defense-finder-models/DefenseFinder_1/AbiL/AbiL	UserReplicon_AbiL_2	1	1	1	2	2	AbiL__AbiLi	mandatory	403	1.1e-27	95.3	0.389	0.457	218	401
Bacteria	WP_015531086.1	GCF_000210075.1	Bacteroidota	AbiL__AbiLii2	2529	defense-finder-models/DefenseFinder_1/AbiL/AbiL	UserReplicon_AbiL_2	1	1	1	2	2	AbiL__AbiLii	mandatory	205	3e-07	28.1	0.411	0.61	62	186
Bacteria	WP_015531520.1	GCF_000210075.1	Bacteroidota	RM_Type_IIG__Type_IIG	2813	defense-finder-models/RM/RM/RM_Type_IIG	UserReplicon_RM_Type_IIG_4	1	1	1	1	1	RM_Type_IIG__Type_IIG	mandatory	1182	2e-137	458.1	0.869	0.959	41	1173
Bacteria	WP_015531607.1	GCF_000210075.1	Bacteroidota	Retron_I_C__RT_1_C3	2872	defense-finder-models/DefenseFinder_5/Retron/Retron_I_C	UserReplicon_Retron_I_C_1	1	1	1	1	1	Retron_I_C__RT_1_C1	mandatory	739	7.9e-76	253.8	0.533	0.411	49	352
Bacteria	WP_015532012.1	GCF_000210075.1	Bacteroidota	AbiU__AbiU	3103	defense-finder-models/DefenseFinder_1/AbiU/AbiU	UserReplicon_AbiU_3	1	1	1	1	1	AbiU__AbiU	mandatory	591	3.2e-50	169.3	0.871	0.858	19	525
Bacteria	WP_015532017.1	GCF_000210075.1	Bacteroidota	Lamassu-Fam__LmuB_SMC_Cap4_nuclease_II	3107	defense-finder-models/DefenseFinder_1/Lamassu-Fam/Lamassu-Fam	UserReplicon_Lamassu-Fam_5	1	1	0.667	2	2	Lamassu-Fam__LmuB_SMC_Cap4_nuclease_II	mandatory	713	3e-18	64.2	0.92	0.914	1	652
Bacteria	WP_015532020.1	GCF_000210075.1	Bacteroidota	Lamassu-Fam__LmuB_SMC_Cap4_nuclease_II	3110	defense-finder-models/DefenseFinder_1/Lamassu-Fam/Lamassu-Fam	UserReplicon_Lamassu-Fam_5	1	1	0.667	2	2	Lamassu-Fam__LmuB_SMC_Cap4_nuclease_II	mandatory	717	4.4e-21	73.6	0.786	0.81	1	581
Bacteria	WP_015532022.1	GCF_000210075.1	Bacteroidota	Lamassu-Fam__LmuA_effector_Mrr	3112	defense-finder-models/DefenseFinder_1/Lamassu-Fam/Lamassu-Fam	UserReplicon_Lamassu-Fam_5	1	1	0.667	2	2	Lamassu-Fam__LmuA_effector_Cap4_nuclease_II	mandatory	263	7.7e-05	20.6	0.188	0.228	119	178
Bacteria	WP_015532022.1	GCF_000210075.1	Bacteroidota	RM_Type_IV__Type_IV_REases	3112	defense-finder-models/RM/RM/RM_Type_IV	UserReplicon_RM_Type_IV_7	1	1	1	1	1	RM_Type_IV__Type_IV_REases	mandatory	263	1.3e-32	111.2	0.325	0.548	110	253
Bacteria	WP_015532542.1	GCF_000210075.1	Bacteroidota	RM__Type_I_REases	3427	defense-finder-models/RM/RM/RM_Type_I	UserReplicon_RM_Type_I_1	1	1	1	2.5	2	RM__Type_I_REases	mandatory	768	1.2e-181	604.1	0.562	0.71	4	548
Bacteria	WP_015532551.1	GCF_000210075.1	Bacteroidota	RM__Type_I_REases	3431	defense-finder-models/RM/RM/RM_Type_I	UserReplicon_RM_Type_I_1	1	1	1	2.5	2	RM__Type_I_REases	mandatory	1076	1.7e-91	306	0.722	0.723	92	869
Bacteria	WP_015532552.1	GCF_000210075.1	Bacteroidota	RM__Type_I_MTases	3432	defense-finder-models/RM/RM/RM_Type_I	UserReplicon_RM_Type_I_1	1	1	1	2.5	2	RM__Type_I_MTases	mandatory	553	6.8e-105	349.8	0.988	0.976	6	545
Bacteria	WP_015532555.1	GCF_000210075.1	Bacteroidota	RM__Type_I_S	3434	defense-finder-models/RM/RM/RM_Type_I	UserReplicon_RM_Type_I_1	1	1	1	2.5	2	RM__Type_I_S	accessory	433	2.8e-60	202.6	0.476	0.965	10	427
Bacteria	WP_015532701.1	GCF_000210075.1	Bacteroidota	Gao_Tmn__TmnA	3516	defense-finder-models/DefenseFinder_1/Gao_Tmn/Gao_Tmn	UserReplicon_Gao_Tmn_4	1	1	1	1	1	Gao_Tmn__TmnA	mandatory	1222	1.9e-64	215.8	0.418	0.453	19	571
Bacteria	WP_015532764.1	GCF_000210075.1	Bacteroidota	RM_Type_II__Type_II_MTases	3560	defense-finder-models/RM/RM/RM_Type_II	UserReplicon_RM_Type_II_3	1	1	1	2	1	RM_Type_II__Type_II_MTases	mandatory	322	2.9e-17	61	0.451	0.798	64	320
Bacteria	WP_015532765.1	GCF_000210075.1	Bacteroidota	RM_Type_II__Type_II_REases	3561	defense-finder-models/RM/RM/RM_Type_II	UserReplicon_RM_Type_II_3	1	1	1	2	1	RM_Type_II__Type_II_REases	mandatory	299	6.4e-13	47	0.74	0.853	32	286
Bacteria	WP_034525771.1	GCF_000154205.1	Bacteroidota	AbiH__AbiH	3455	defense-finder-models/DefenseFinder_1/AbiH/AbiH	UserReplicon_AbiH_2	1	1	1	1	1	AbiH__AbiH	mandatory	177	3.2e-13	48	0.365	0.542	13	108
Bacteria	WP_038465767.1	GCF_002217405.1	Bacteroidota	RM_Type_IIG__Type_IIG	1807	defense-finder-models/RM/RM/RM_Type_IIG	UserReplicon_RM_Type_IIG_6	1	1	1	1	1	RM_Type_IIG__Type_IIG	mandatory	1010	0	1012	1.043	0.999	1	1009
Bacteria	WP_038465916.1	GCF_002217405.1	Bacteroidota	AbiH__AbiH	1832	defense-finder-models/DefenseFinder_1/AbiH/AbiH	UserReplicon_AbiH_1	1	1	1	1	1	AbiH__AbiH	mandatory	330	1.1e-39	134	0.996	0.812	4	271
Bacteria	WP_038465919.1	GCF_002217405.1	Bacteroidota	RM_Type_IIG__Type_IIG	1833	defense-finder-models/RM/RM/RM_Type_IIG	UserReplicon_RM_Type_IIG_7	1	1	1	1	2	RM_Type_IIG__Type_IIG	mandatory	1056	2e-116	387.6	0.977	0.965	37	1055
Bacteria	WP_038465937.1	GCF_002217405.1	Bacteroidota	RM_Type_IIG__Type_IIG	1836	defense-finder-models/RM/RM/RM_Type_IIG	UserReplicon_RM_Type_IIG_7	1	1	1	1	2	RM_Type_IIG__Type_IIG	mandatory	998	5.3e-105	349.8	0.974	0.944	55	996
Bacteria	WP_038466038.1	GCF_002217405.1	Bacteroidota	RM_Type_II__Type_II_MTases	1857	defense-finder-models/RM/RM/RM_Type_II	UserReplicon_RM_Type_II_3	1	1	1	2	1	RM_Type_II__Type_II_MTases	mandatory	369	4.3e-23	79.3	0.413	0.415	199	351
Bacteria	WP_038466041.1	GCF_002217405.1	Bacteroidota	RM_Type_II__Type_II_REases	1858	defense-finder-models/RM/RM/RM_Type_II	UserReplicon_RM_Type_II_3	1	1	1	2	1	RM_Type_II__Type_II_REases	mandatory	369	4.8e-93	309.5	1.405	0.995	1	367
Bacteria	WP_038466264.1	GCF_002217405.1	Bacteroidota	RM__Type_I_REases	1907	defense-finder-models/RM/RM/RM_Type_I	UserReplicon_RM_Type_I_1	1	1	0.667	2	1	RM__Type_I_REases	mandatory	942	3.8e-197	654.8	0.934	0.952	1	897
Bacteria	WP_038466278.1	GCF_002217405.1	Bacteroidota	RM__Type_I_MTases	1911	defense-finder-models/RM/RM/RM_Type_I	UserReplicon_RM_Type_I_1	1	1	0.667	2	1	RM__Type_I_MTases	mandatory	530	1.9e-170	565.2	0.996	0.992	1	526
Bacteria	WP_038466367.1	GCF_002217405.1	Bacteroidota	RM_Type_IIG__Type_IIG	1930	defense-finder-models/RM/RM/RM_Type_IIG	UserReplicon_RM_Type_IIG_8	1	1	1	1	1	RM_Type_IIG__Type_IIG	mandatory	1294	3.4e-98	327.3	0.934	0.827	2	1071
Bacteria	WP_038466501.1	GCF_002217405.1	Bacteroidota	RM__Type_I_MTases	1960	defense-finder-models/RM/RM/RM_Type_I	UserReplicon_RM_Type_I_2	1	1	0.667	2	1	RM__Type_I_MTases	mandatory	700	2.9e-143	475.5	0.992	0.997	1	698
Bacteria	WP_038466504.1	GCF_002217405.1	Bacteroidota	Tiamat__TmtA	1961	defense-finder-models/DefenseFinder_5/Tiamat/Tiamat	UserReplicon_Tiamat_1	1	1	1	1	1	Tiamat__TmtA	mandatory	1620	0	1333.3	0.994	0.996	8	1620
Bacteria	WP_038466509.1	GCF_002217405.1	Bacteroidota	RM__Type_I_REases	1962	defense-finder-models/RM/RM/RM_Type_I	UserReplicon_RM_Type_I_2	1	1	0.667	2	1	RM__Type_I_REases	mandatory	1097	7.7e-168	557.8	0.988	0.968	1	1062
Bacteria	WP_038466556.1	GCF_002217405.1	Bacteroidota	Kiwa__KwaB	1976	defense-finder-models/DefenseFinder_1/Kiwa/Kiwa	UserReplicon_Kiwa_2	1	1	1	2	1	Kiwa__KwaB	mandatory	319	3.5e-65	217.5	0.994	0.975	1	311
Bacteria	WP_038466559.1	GCF_002217405.1	Bacteroidota	Kiwa__KwaA	1977	defense-finder-models/DefenseFinder_1/Kiwa/Kiwa	UserReplicon_Kiwa_2	1	1	1	2	1	Kiwa__KwaA	mandatory	181	1.4e-42	142.5	0.911	0.989	2	180
Bacteria	WP_038466623.1	GCF_002217405.1	Bacteroidota	RM_Type_II__Type_II_REases	1994	defense-finder-models/RM/RM/RM_Type_II	UserReplicon_RM_Type_II_4	1	1	1	2	1	RM_Type_II__Type_II_REases	mandatory	466	2.9e-75	251.3	1.824	0.914	8	433
Bacteria	WP_038466626.1	GCF_002217405.1	Bacteroidota	RM_Type_II__Type_II_MTases	1995	defense-finder-models/RM/RM/RM_Type_II	UserReplicon_RM_Type_II_4	1	1	1	2	1	RM_Type_II__Type_II_MTases	mandatory	428	1.9e-196	649.9	1.093	0.981	1	420
Bacteria	WP_038466650.1	GCF_002217405.1	Bacteroidota	AbiP2__AbiP2	2001	defense-finder-models/DefenseFinder_2/AbiP2/AbiP2	UserReplicon_AbiP2_1	1	1	1	1	1	AbiP2__AbiP2	mandatory	497	1e-191	635	0.994	0.99	1	492
Bacteria	WP_038466656.1	GCF_002217405.1	Bacteroidota	RM_Type_II__Type_II_MTases	2003	defense-finder-models/RM/RM/RM_Type_II	UserReplicon_RM_Type_II_5	1	1	1	2	2	RM_Type_II__Type_II_MTases	mandatory	539	1.4e-86	288.3	1.331	0.902	24	509
Bacteria	WP_038466667.1	GCF_002217405.1	Bacteroidota	RM_Type_II__Type_II_REases	2006	defense-finder-models/RM/RM/RM_Type_II	UserReplicon_RM_Type_II_5	1	1	1	2	2	RM_Type_II__Type_II_REases	mandatory	360	4.1e-36	123	1.374	0.992	3	359
Bacteria	WP_038466669.1	GCF_002217405.1	Bacteroidota	RM_Type_II__Type_II_MTases	2007	defense-finder-models/RM/RM/RM_Type_II	UserReplicon_RM_Type_II_5	1	1	1	2	2	RM_Type_II__Type_II_MTases	mandatory	350	1.5e-119	396.2	0.904	0.997	1	349
Bacteria	WP_038466711.1	GCF_002217405.1	Bacteroidota	RM_Type_IIG__Type_IIG	2012	defense-finder-models/RM/RM/RM_Type_IIG	UserReplicon_RM_Type_IIG_9	1	1	1	1	1	RM_Type_IIG__Type_IIG	mandatory	678	6.4e-204	677	0.706	0.991	1	672
Bacteria	WP_038467005.1	GCF_002217405.1	Bacteroidota	DarTG__DarG	2068	defense-finder-models/DefenseFinder_2/DarTG/DarTG	UserReplicon_DarTG_2	1	1	1	2	1	DarTG__DarG	mandatory	344	2.7e-26	89.9	0.671	0.43	1	148
Bacteria	WP_038467008.1	GCF_002217405.1	Bacteroidota	DarTG__DarT	2069	defense-finder-models/DefenseFinder_2/DarTG/DarTG	UserReplicon_DarTG_2	1	1	1	2	1	DarTG__DarT	mandatory	207	4.8e-39	131.3	1	0.957	10	207
Bacteria	WP_040552636.1	GCF_000157935.1	Bacteroidota	RM_Type_IIG__Type_IIG	2333	defense-finder-models/RM/RM/RM_Type_IIG	UserReplicon_RM_Type_IIG_9	1	1	1	1	1	RM_Type_IIG__Type_IIG	mandatory	918	1.7e-222	738.4	0.895	0.904	88	917
Bacteria	WP_041174404.1	GCF_000012825.1	Bacteroidota	Mokosh_TypeII__MkoC	3669	defense-finder-models/DefenseFinder_4/Mokosh/Mokosh_TypeII	UserReplicon_Mokosh_TypeII_2	1	1	1	1	1	Mokosh_TypeII__MkoC	mandatory	1155	8e-224	743.8	0.525	0.525	437	1042
Bacteria	WP_041926181.1	GCF_000025985.1	Bacteroidota	AbiJ__AbiJ	3896	defense-finder-models/DefenseFinder_1/AbiJ/AbiJ	UserReplicon_AbiJ_2	1	1	1	1	1	AbiJ__AbiJ	mandatory	269	2.6e-05	21.6	0.477	0.554	118	266
Bacteria	WP_050764873.1	GCF_013009555.1	Bacteroidota	SpbK__SpbK	4134	defense-finder-models/DefenseFinder_3/SpbK/SpbK	UserReplicon_SpbK_3	1	1	1	1	1	SpbK__SpbK	mandatory	251	1e-35	121.8	0.464	0.673	77	245
Bacteria	WP_052588042.1	GCF_001314995.1	Bacteroidota	RM_Type_IIG__Type_IIG	4542	defense-finder-models/RM/RM/RM_Type_IIG	UserReplicon_RM_Type_IIG_5	1	1	1	1	1	RM_Type_IIG__Type_IIG	mandatory	1108	2.4e-123	411.6	0.881	0.945	52	1098
Bacteria	WP_074713728.1	GCF_000154525.1	Bacteroidota	AbiD__AbiD	3068	defense-finder-models/DefenseFinder_1/AbiD/AbiD	UserReplicon_AbiD_1	1	1	1	1	1	AbiD__AbiD	mandatory	296	1.8e-73	245.3	0.923	0.983	2	292
Bacteria	WP_208946739.1	GCF_000210075.1	Bacteroidota	RM_Type_IIG__Type_IIG	4139	defense-finder-models/RM/RM/RM_Type_IIG	UserReplicon_RM_Type_IIG_5	1	1	1	1	1	RM_Type_IIG__Type_IIG	mandatory	699	4.2e-137	456.9	0.455	0.781	26	571
Bacteria	WP_208946845.1	GCF_000210075.1	Bacteroidota	RM_Type_IIG__Type_IIG	4239	defense-finder-models/RM/RM/RM_Type_IIG	UserReplicon_RM_Type_IIG_6	1	1	1	1	1	RM_Type_IIG__Type_IIG	mandatory	868	8.7e-91	303.8	0.615	0.94	51	866
Bacteria	WP_224440814.1	GCF_001314995.1	Bacteroidota	RM_Type_IIG__Type_IIG	4650	defense-finder-models/RM/RM/RM_Type_IIG	UserReplicon_RM_Type_IIG_6	1	1	1	1	1	RM_Type_IIG__Type_IIG	mandatory	932	2.1e-98	329.1	0.474	0.996	2	929
Bacteria	WP_227945674.1	GCF_000154105.1	Bacteroidota	pAgo__pAgo_Short	3353	defense-finder-models/DefenseFinder_5/pAgo/pAgo	UserReplicon_pAgo_3	1	1	1	1	1	pAgo__pAgo_LongA	mandatory	606	6.3e-146	484.6	0.987	0.774	138	606
Bacteria	WP_229775085.1	GCF_000157935.1	Bacteroidota	AbiD__AbiD	2776	defense-finder-models/DefenseFinder_1/AbiD/AbiD	UserReplicon_AbiD_4	1	1	1	1	1	AbiD__AbiD	mandatory	249	1.6e-61	205.8	0.759	0.96	5	243
Bacteria	WP_244263576.1	GCF_000157935.1	Bacteroidota	AbiD__AbiD	2788	defense-finder-models/DefenseFinder_1/AbiD/AbiD	UserReplicon_AbiD_5	1	1	1	1	1	AbiD__AbiD	mandatory	249	1e-62	209.7	0.759	0.96	5	243
Asgard	D4993_C5_H3_Bin_603_scaffold_405397_1	D4993_C5_H3_Bin_603_clean	Baldrarchaeia	Cas__cas5_I-A_4	2178	defense-finder-models/Cas/Cas/CAS_Class1-Subtype-I-A	UserReplicon_CAS_Class1-Subtype-I-A_1	1	1	0.444	4	1	Cas__cas5a_I-A_1	mandatory	85	5e-20	69.7	0.469	0.965	4	85
Asgard	D4993_C5_H3_Bin_603_scaffold_405397_2	D4993_C5_H3_Bin_603_clean	Baldrarchaeia	Cas__cas7_I-A_1	2179	defense-finder-models/Cas/Cas/CAS_Class1-Subtype-I-A	UserReplicon_CAS_Class1-Subtype-I-A_1	1	1	0.444	4	1	Cas__cas7_I-A_1	mandatory	323	3.4e-95	315.9	0.996	0.87	9	289
Asgard	D4993_C5_H3_Bin_603_scaffold_405397_3	D4993_C5_H3_Bin_603_clean	Baldrarchaeia	Cas__csa5gr11_I-A_3	2180	defense-finder-models/Cas/Cas/CAS_Class1-Subtype-I-A	UserReplicon_CAS_Class1-Subtype-I-A_1	1	1	0.444	4	1	Cas__csa5gr11_I-A_3	mandatory	117	6.2e-14	49.5	0.98	0.786	15	106
Asgard	D4993_C5_H3_Bin_603_scaffold_405397_4	D4993_C5_H3_Bin_603_clean	Baldrarchaeia	Cas__casR_I_2	2181	defense-finder-models/Cas/Cas/CAS_Class1-Subtype-I-A	UserReplicon_CAS_Class1-Subtype-I-A_1	1	1	0.444	4	1	Cas__casR_I_1	neutral	212	5.5e-37	124.5	0.959	0.991	1	210
Asgard	D4993_C5_H3_Bin_603_scaffold_405397_5	D4993_C5_H3_Bin_603_clean	Baldrarchaeia	Cas__cas6_I_II_III_IV_V_VI_22	2182	defense-finder-models/Cas/Cas/CAS_Class1-Subtype-I-A	UserReplicon_CAS_Class1-Subtype-I-A_1	1	1	0.444	4	1	Cas__cas6_I-A_III-D_3	accessory	299	1.2e-17	62	1	0.475	138	279
Asgard	D4993_C5_H3_Bin_603_scaffold_120753_3	D4993_C5_H3_Bin_603_clean	Baldrarchaeia	pAgo__pAgo_LongA	111	defense-finder-models/DefenseFinder_5/pAgo/pAgo	UserReplicon_pAgo_1	1	1	1	1	2	pAgo__pAgo_LongA	mandatory	405	1.5e-50	169.7	0.419	0.768	95	405
Asgard	D4993_C5_H3_Bin_603_scaffold_120753_4	D4993_C5_H3_Bin_603_clean	Baldrarchaeia	pAgo__COG1431_pAgo	112	defense-finder-models/DefenseFinder_5/pAgo/pAgo	UserReplicon_pAgo_1	1	1	1	1	2	pAgo__pAgo_LongA	mandatory	429	2.3e-16	57	0.426	0.739	103	419
Asgard	D4993_C5_H3_Bin_603_scaffold_227772_1	D4993_C5_H3_Bin_603_clean	Baldrarchaeia	pAgo__pAgo_Short	961	defense-finder-models/DefenseFinder_5/pAgo/pAgo	UserReplicon_pAgo_2	1	1	1	1	1	pAgo__pAgo_LongA	mandatory	214	2.6e-25	86.7	0.362	0.822	22	197
Asgard	D4993_C5_H3_Bin_603_scaffold_65028_2	D4993_C5_H3_Bin_603_clean	Baldrarchaeia	RloC__RloC	2823	defense-finder-models/DefenseFinder_1/RloC/RloC	UserReplicon_RloC_1	1	1	1	1	1	RloC__RloC	mandatory	617	2.6e-39	132.9	0.729	0.885	37	582
Asgard	D4994_C39_H2_Bin_222_scaffold_129448_1	D4994_C39_H2_Bin_222	Baldrarchaeia	Cas__cmr4gr7_III-B_III-C_2	651	defense-finder-models/Cas/Cas/CAS_Class1-Subtype-III-C	UserReplicon_CAS_Class1-Subtype-III-C_1	1	1	0.333	2	1	Cas__cmr4gr7_III-B_III-C_2	accessory	459	6.5e-47	157.2	0.98	0.697	7	326
Asgard	D4994_C39_H2_Bin_222_scaffold_129448_2	D4994_C39_H2_Bin_222	Baldrarchaeia	Cas__cmr3gr5_III-C_1	652	defense-finder-models/Cas/Cas/CAS_Class1-Subtype-III-C	UserReplicon_CAS_Class1-Subtype-III-C_1	1	1	0.333	2	1	Cas__cmr3gr5_III-C_1	mandatory	323	3.6e-70	233.2	0.993	0.994	1	321
Asgard	D4994_C39_H2_Bin_222_scaffold_51695_5	D4994_C39_H2_Bin_222	Baldrarchaeia	RM_Type_II__Type_II_REases	1351	defense-finder-models/RM/RM/RM_Type_II	UserReplicon_RM_Type_II_1	1	1	1	2	1	RM_Type_II__Type_II_REases	mandatory	288	6.6e-07	25.6	0.34	0.326	186	279
Asgard	D4994_C39_H2_Bin_222_scaffold_51695_6	D4994_C39_H2_Bin_222	Baldrarchaeia	RM_Type_II__Type_II_MTases	1352	defense-finder-models/RM/RM/RM_Type_II	UserReplicon_RM_Type_II_1	1	1	1	2	1	RM_Type_II__Type_II_MTases	mandatory	578	1.9e-30	102.9	0.265	0.168	208	304
Asgard	D4998_C1112_H2_Bin_232_scaffold_519488_24	D4998_C1112_H2_Bin_232	Baldrarchaeia	Cas__cas10_III_1	1788	defense-finder-models/Cas/Cas/CAS_Class1-Type-III	UserReplicon_CAS_Class1-Type-III_1	1	1	0.15	3	1	Cas__cas10_III_1	mandatory	1163	3.6e-44	148.5	0.953	0.613	202	914
Asgard	D4998_C1112_H2_Bin_232_scaffold_519488_25	D4998_C1112_H2_Bin_232	Baldrarchaeia	Cas__cmr3gr5_III-B_III-C_5	1789	defense-finder-models/Cas/Cas/CAS_Class1-Type-III	UserReplicon_CAS_Class1-Type-III_1	1	1	0.15	3	1	Cas__csm4gr5_III-A_3	mandatory	405	1.8e-28	97.1	0.902	0.859	19	366
Asgard	D4998_C1112_H2_Bin_232_scaffold_519488_26	D4998_C1112_H2_Bin_232	Baldrarchaeia	Cas__cmr4gr7_III-B_III-C_2	1790	defense-finder-models/Cas/Cas/CAS_Class1-Type-III	UserReplicon_CAS_Class1-Type-III_1	1	1	0.15	3	1	Cas__csm3gr7_III-A_1	mandatory	349	4.1e-50	168	0.977	0.943	16	344
Asgard	D4998_C1112_H2_Bin_232_scaffold_519488_28	D4998_C1112_H2_Bin_232	Baldrarchaeia	Cas__cmr4gr7_III-B_III-C_1	1792	defense-finder-models/Cas/Cas/CAS_Class1-Type-III	UserReplicon_CAS_Class1-Type-III_1	1	1	0.15	3	1	Cas__csm3gr7_III-A_1	mandatory	316	2.6e-22	76.8	0.885	0.823	9	268
Asgard	D4998_C1112_H3_Bin_205_scaffold_235766_1	D4998_C1112_H3_Bin_205	Baldrarchaeia	Cas__cmr4gr7_III-B_III-C_1	1508	defense-finder-models/Cas/Cas/CAS_Class1-Subtype-III-B	UserReplicon_CAS_Class1-Subtype-III-B_1	1	1	1	7	1	Cas__cmr4gr7_III-B_III-C_2	accessory	160	1.3e-27	94.5	0.482	0.863	18	155
Asgard	D4998_C1112_H3_Bin_205_scaffold_235766_2	D4998_C1112_H3_Bin_205	Baldrarchaeia	Cas__cmr5gr11_III-B_15	1509	defense-finder-models/Cas/Cas/CAS_Class1-Subtype-III-B	UserReplicon_CAS_Class1-Subtype-III-B_1	1	1	1	7	1	Cas__cmr5gr11_III-B_18	mandatory	154	1.1e-29	100.8	0.988	0.968	1	149
Asgard	D4998_C1112_H3_Bin_205_scaffold_235766_3	D4998_C1112_H3_Bin_205	Baldrarchaeia	Cas__cmr1gr7_III-B_III-C_3	1510	defense-finder-models/Cas/Cas/CAS_Class1-Subtype-III-B	UserReplicon_CAS_Class1-Subtype-III-B_1	1	1	1	7	1	Cas__cmr1gr7_III-B_III-C_3	accessory	538	5.7e-13	46.7	0.919	0.546	31	324
Asgard	D4998_C1112_H3_Bin_205_scaffold_235766_4	D4998_C1112_H3_Bin_205	Baldrarchaeia	Cas__cmr6gr7_III-B_3	1511	defense-finder-models/Cas/Cas/CAS_Class1-Subtype-III-B	UserReplicon_CAS_Class1-Subtype-III-B_1	1	1	1	7	1	Cas__cmr6gr7_III-B_1	mandatory	275	2e-35	120	0.914	0.916	16	267
Asgard	D4998_C1112_H3_Bin_205_scaffold_235766_5	D4998_C1112_H3_Bin_205	Baldrarchaeia	Cas__cas10_III_1	1512	defense-finder-models/Cas/Cas/CAS_Class1-Subtype-III-B	UserReplicon_CAS_Class1-Subtype-III-B_1	1	1	1	7	1	Cas__cas10_III_1	accessory	1062	1.6e-74	248.9	0.969	0.648	205	892
Asgard	D4998_C1112_H3_Bin_205_scaffold_235766_6	D4998_C1112_H3_Bin_205	Baldrarchaeia	Cas__cmr3gr5_III-B_III-C_4	1513	defense-finder-models/Cas/Cas/CAS_Class1-Subtype-III-B	UserReplicon_CAS_Class1-Subtype-III-B_1	1	1	1	7	1	Cas__cmr3gr5_III-B_III-C_5	accessory	352	2e-21	74	0.991	0.938	18	347
Asgard	D4998_C1112_H3_Bin_205_scaffold_235766_7	D4998_C1112_H3_Bin_205	Baldrarchaeia	Cas__csx1_III_2	1514	defense-finder-models/Cas/Cas/CAS_Class1-Subtype-III-B	UserReplicon_CAS_Class1-Subtype-III-B_1	1	1	1	7	1	Cas__csx1_III_10	accessory	436	4.3e-83	277.1	0.997	0.959	3	420
Asgard	D4998_C1112_H3_Bin_205_scaffold_235766_8	D4998_C1112_H3_Bin_205	Baldrarchaeia	Cas__csx3_I_III_1	1515	defense-finder-models/Cas/Cas/CAS_Class1-Subtype-III-B	UserReplicon_CAS_Class1-Subtype-III-B_1	1	1	1	7	1	Cas__csx3_I_III_1	neutral	101	1.2e-36	122.2	1	0.822	14	96
Asgard	D4998_C1112_H3_Bin_205_scaffold_263628_5	D4998_C1112_H3_Bin_205	Baldrarchaeia	Cas__cas2_I_II_III_IV_V_VI_13	1941	defense-finder-models/Cas/Cas/CAS_Cluster	UserReplicon_CAS_Cluster_4	1	1	0.04	2	1	Cas__cas2_I_II_III_IV_V_VI_1	mandatory	92	1e-20	71.1	0.986	0.772	1	71
Asgard	D4998_C1112_H3_Bin_205_scaffold_263628_9	D4998_C1112_H3_Bin_205	Baldrarchaeia	Cas__cas1_I_II_III_IV_V_VI_1	1945	defense-finder-models/Cas/Cas/CAS_Cluster	UserReplicon_CAS_Cluster_4	1	1	0.04	2	1	Cas__cas1_I_II_III_IV_V_VI_1	mandatory	323	1.2e-58	196	0.975	0.938	8	310
Asgard	D4998_C1112_H3_Bin_205_scaffold_93243_1	D4998_C1112_H3_Bin_205	Baldrarchaeia	Cas__cas4_I_II_III_IV_V_VI_7	2776	defense-finder-models/Cas/Cas/CAS_Cluster	UserReplicon_CAS_Cluster_5	1	1	0.06	3	1	Cas__cas4_I_II_III_IV_V_VI_1	mandatory	223	1e-51	173.4	0.743	0.978	4	221
Asgard	D4998_C1112_H3_Bin_205_scaffold_93243_2	D4998_C1112_H3_Bin_205	Baldrarchaeia	Cas__cas1_I_II_III_IV_V_VI_10	2777	defense-finder-models/Cas/Cas/CAS_Cluster	UserReplicon_CAS_Cluster_5	1	1	0.06	3	1	Cas__cas1_I_II_III_IV_V_VI_1	mandatory	342	2.3e-81	270.4	0.993	0.863	4	298
Asgard	D4998_C1112_H3_Bin_205_scaffold_93243_3	D4998_C1112_H3_Bin_205	Baldrarchaeia	Cas__cas2_I_II_III_IV_V_VI_5	2778	defense-finder-models/Cas/Cas/CAS_Cluster	UserReplicon_CAS_Cluster_5	1	1	0.06	3	1	Cas__cas2_I_II_III_IV_V_VI_1	mandatory	96	2e-22	76.7	0.955	0.885	1	85
Asgard	D4998_C1112_H3_Bin_205_scaffold_93243_4	D4998_C1112_H3_Bin_205	Baldrarchaeia	Cas__cas4_I_II_III_IV_V_VI_1	2779	defense-finder-models/Cas/Cas/CAS_Cluster	UserReplicon_CAS_Cluster_5	1	1	0.06	3	1	Cas__cas4_I_II_III_IV_V_VI_1	mandatory	220	1e-31	107.9	1	0.877	26	218
Asgard	D4998_C1112_H3_Bin_205_scaffold_21741_5	D4998_C1112_H3_Bin_205	Baldrarchaeia	ShosTA__ShosA	1378	defense-finder-models/DefenseFinder_2/ShosTA/ShosTA	UserReplicon_ShosTA_1	1	1	1	2	1	ShosTA__ShosA	mandatory	228	4.3e-63	210.6	0.673	0.877	16	215
Asgard	D4998_C1112_H3_Bin_205_scaffold_21741_6	D4998_C1112_H3_Bin_205	Baldrarchaeia	ShosTA__ShosT	1379	defense-finder-models/DefenseFinder_2/ShosTA/ShosTA	UserReplicon_ShosTA_1	1	1	1	2	1	ShosTA__ShosT	mandatory	205	5e-23	79.4	0.806	0.849	29	202
Asgard	D4998_C1112_H3_Bin_205_scaffold_134788_11	D4998_C1112_H3_Bin_205	Baldrarchaeia	RM_Type_IIG__Type_IIG	355	defense-finder-models/RM/RM/RM_Type_IIG	UserReplicon_RM_Type_IIG_1	1	1	1	1	1	RM_Type_IIG__Type_IIG	mandatory	1316	3e-126	420.4	0.936	0.914	89	1291
Asgard	D4998_C1112_H3_Bin_205_scaffold_263628_6	D4998_C1112_H3_Bin_205	Baldrarchaeia	pAgo__COG1431_pAgo	1942	defense-finder-models/DefenseFinder_5/pAgo/pAgo	UserReplicon_pAgo_1	1	1	1	1	2	pAgo__pAgo_LongA	mandatory	429	4.1e-16	56	0.425	0.737	104	419
Asgard	D4998_C1112_H3_Bin_205_scaffold_263628_7	D4998_C1112_H3_Bin_205	Baldrarchaeia	pAgo__pAgo_LongA	1943	defense-finder-models/DefenseFinder_5/pAgo/pAgo	UserReplicon_pAgo_1	1	1	1	1	2	pAgo__pAgo_LongA	mandatory	406	2.9e-50	168.6	0.415	0.761	98	406
Asgard	D4998_C1112_H3_Bin_60_scaffold_118923_1	D4998_C1112_H3_Bin_60	Baldrarchaeia	Cas__cas1_I_II_III_IV_V_VI_1	116	defense-finder-models/Cas/Cas/CAS_Cluster	UserReplicon_CAS_Cluster_10	1	1	0.04	2	1	Cas__cas1_I_II_III_IV_V_VI_1	mandatory	146	7.3e-43	144.3	0.426	0.911	1	133
Asgard	D4998_C1112_H3_Bin_60_scaffold_118923_2	D4998_C1112_H3_Bin_60	Baldrarchaeia	Cas__cas2_I_II_III_IV_V_VI_3	119	defense-finder-models/Cas/Cas/CAS_Cluster	UserReplicon_CAS_Cluster_10	1	1	0.04	2	1	Cas__cas2_I_II_III_IV_V_VI_1	mandatory	92	2.6e-19	66.7	0.937	0.815	4	78
Asgard	D4998_C1112_H3_Bin_60_scaffold_122988_3	D4998_C1112_H3_Bin_60	Baldrarchaeia	Cas__csx10gr5_III-D_2	143	defense-finder-models/Cas/Cas/CAS_Class1-Subtype-III-D	UserReplicon_CAS_Class1-Subtype-III-D_4	1	1	0.375	3	1	Cas__csx10gr5_III-D_3	mandatory	385	1.2e-15	55.4	0.946	0.951	18	383
Asgard	D4998_C1112_H3_Bin_60_scaffold_122988_4	D4998_C1112_H3_Bin_60	Baldrarchaeia	Cas__csm3gr7_III-A_III-D_2	144	defense-finder-models/Cas/Cas/CAS_Class1-Subtype-III-D	UserReplicon_CAS_Class1-Subtype-III-D_4	1	1	0.375	3	1	Cas__csm3gr7_III-A_III-D_10	accessory	302	7.1e-21	72.2	0.981	0.831	6	256
Asgard	D4998_C1112_H3_Bin_60_scaffold_122988_5	D4998_C1112_H3_Bin_60	Baldrarchaeia	Cas__cas6_I_II_III_IV_V_VI_22	145	defense-finder-models/Cas/Cas/CAS_Class1-Subtype-III-D	UserReplicon_CAS_Class1-Subtype-III-D_4	1	1	0.375	3	1	Cas__cas6_I_II_III_IV_V_VI_17	accessory	294	1.3e-10	39.3	0.982	0.418	164	286
Asgard	D4998_C1112_H3_Bin_60_scaffold_197796_2	D4998_C1112_H3_Bin_60	Baldrarchaeia	Cas__cmr4gr7_III-B_III-C_2	1109	defense-finder-models/Cas/Cas/CAS_Class1-Type-III	UserReplicon_CAS_Class1-Type-III_8	1	1	0.15	3	1	Cas__csm3gr7_III-A_1	mandatory	349	5.4e-50	168	0.977	0.943	16	344
Asgard	D4998_C1112_H3_Bin_60_scaffold_197796_3	D4998_C1112_H3_Bin_60	Baldrarchaeia	Cas__cmr3gr5_III-B_III-C_5	1110	defense-finder-models/Cas/Cas/CAS_Class1-Type-III	UserReplicon_CAS_Class1-Type-III_8	1	1	0.15	3	1	Cas__csm4gr5_III-A_3	mandatory	405	2.3e-28	97.1	0.902	0.859	19	366
Asgard	D4998_C1112_H3_Bin_60_scaffold_197796_4	D4998_C1112_H3_Bin_60	Baldrarchaeia	Cas__cas10_III_1	1111	defense-finder-models/Cas/Cas/CAS_Class1-Type-III	UserReplicon_CAS_Class1-Type-III_8	1	1	0.15	3	1	Cas__cas10_III_1	mandatory	1160	5.1e-44	148.4	0.951	0.614	199	910
Asgard	D4998_C1112_H3_Bin_60_scaffold_219943_2	D4998_C1112_H3_Bin_60	Baldrarchaeia	Cas__cmr4gr7_III-B_III-C_1	1347	defense-finder-models/Cas/Cas/CAS_Class1-Subtype-III-B	UserReplicon_CAS_Class1-Subtype-III-B_2	1	1	0.429	3	1	Cas__cmr4gr7_III-B_III-C_2	accessory	481	3.6e-22	76.7	0.982	0.649	9	320
Asgard	D4998_C1112_H3_Bin_60_scaffold_219943_3	D4998_C1112_H3_Bin_60	Baldrarchaeia	Cas__cmr6gr7_III-B_3	1348	defense-finder-models/Cas/Cas/CAS_Class1-Subtype-III-B	UserReplicon_CAS_Class1-Subtype-III-B_2	1	1	0.429	3	1	Cas__cmr6gr7_III-B_1	mandatory	328	3.7e-27	93	0.887	0.896	26	319
Asgard	D4998_C1112_H3_Bin_60_scaffold_219943_4	D4998_C1112_H3_Bin_60	Baldrarchaeia	Cas__cmr1gr7_III-B_III-C_3	1349	defense-finder-models/Cas/Cas/CAS_Class1-Subtype-III-B	UserReplicon_CAS_Class1-Subtype-III-B_2	1	1	0.429	3	1	Cas__cmr1gr7_III-B_III-C_3	accessory	504	1.2e-06	26.2	0.948	0.433	10	227
Asgard	D4998_C1112_H3_Bin_60_scaffold_245487_1	D4998_C1112_H3_Bin_60	Baldrarchaeia	Cas__cmr6gr7_III-B_2	1719	defense-finder-models/Cas/Cas/CAS_Class1-Subtype-III-B	UserReplicon_CAS_Class1-Subtype-III-B_3	1	1	0.286	2	1	Cas__cmr6gr7_III-B_1	mandatory	196	1.9e-17	61.1	0.44	0.735	42	185
Asgard	D4998_C1112_H3_Bin_60_scaffold_245487_2	D4998_C1112_H3_Bin_60	Baldrarchaeia	Cas__cmr1gr7_III-B_III-C_3	1720	defense-finder-models/Cas/Cas/CAS_Class1-Subtype-III-B	UserReplicon_CAS_Class1-Subtype-III-B_3	1	1	0.286	2	1	Cas__cmr1gr7_III-B_III-C_3	accessory	506	3.6e-08	31.2	0.965	0.443	7	230
Asgard	D4998_C1112_H3_Bin_60_scaffold_277499_4	D4998_C1112_H3_Bin_60	Baldrarchaeia	Cas__csm3gr7_III-A_III-D_2	2017	defense-finder-models/Cas/Cas/CAS_Class1-Subtype-III-D	UserReplicon_CAS_Class1-Subtype-III-D_5	1	1	0.375	3	1	Cas__csm3gr7_III-A_III-D_10	accessory	299	1.5e-49	165.9	0.986	0.739	14	234
Asgard	D4998_C1112_H3_Bin_60_scaffold_277499_5	D4998_C1112_H3_Bin_60	Baldrarchaeia	Cas__csm3gr7_III-A_III-D_2	2018	defense-finder-models/Cas/Cas/CAS_Class1-Subtype-III-D	UserReplicon_CAS_Class1-Subtype-III-D_5	1	1	0.375	3	1	Cas__csm3gr7_III-A_III-D_10	accessory	252	3.4e-33	112.5	0.972	0.829	13	221
Asgard	D4998_C1112_H3_Bin_60_scaffold_277499_6	D4998_C1112_H3_Bin_60	Baldrarchaeia	Cas__csm2gr11_III-D_8	2019	defense-finder-models/Cas/Cas/CAS_Class1-Subtype-III-D	UserReplicon_CAS_Class1-Subtype-III-D_5	1	1	0.375	3	1	Cas__csm2gr11_III-D_5	mandatory	129	4.6e-14	49.9	0.9	0.938	4	124
Asgard	D4998_C1112_H3_Bin_60_scaffold_277499_7	D4998_C1112_H3_Bin_60	Baldrarchaeia	Cas__csx1_III_19	2020	defense-finder-models/Cas/Cas/CAS_Class1-Subtype-III-D	UserReplicon_CAS_Class1-Subtype-III-D_5	1	1	0.375	3	1	Cas__csx1_III_10	accessory	445	2.6e-71	238.6	1	0.892	5	401
Asgard	D4998_C1112_H3_Bin_60_scaffold_61714_10	D4998_C1112_H3_Bin_60	Baldrarchaeia	Cas__csm6_III_7	2666	defense-finder-models/Cas/Cas/CAS_Cluster	UserReplicon_CAS_Cluster_16	1	1	0.04	2	1	Cas__csm6_III_2	neutral	164	6.9e-08	30	0.853	0.683	22	133
Asgard	D4998_C1112_H3_Bin_60_scaffold_61714_3	D4998_C1112_H3_Bin_60	Baldrarchaeia	Cas__cas2_I_II_III_IV_V_VI_5	2670	defense-finder-models/Cas/Cas/CAS_Cluster	UserReplicon_CAS_Cluster_16	1	1	0.04	2	1	Cas__cas2_I_II_III_IV_V_VI_1	mandatory	96	3e-19	66.6	0.933	0.865	1	83
Asgard	D4998_C1112_H3_Bin_60_scaffold_61714_6	D4998_C1112_H3_Bin_60	Baldrarchaeia	Cas__cas2_I_II_III_IV_V_VI_5	2673	defense-finder-models/Cas/Cas/CAS_Cluster	UserReplicon_CAS_Cluster_16	1	1	0.04	2	1	Cas__cas2_I_II_III_IV_V_VI_1	mandatory	91	8.3e-18	62	0.933	0.912	1	83
Asgard	D4998_C1112_H3_Bin_60_scaffold_61714_7	D4998_C1112_H3_Bin_60	Baldrarchaeia	Cas__cas4_I_II_III_IV_V_VI_1	2674	defense-finder-models/Cas/Cas/CAS_Cluster	UserReplicon_CAS_Cluster_16	1	1	0.04	2	1	Cas__cas4_I_II_III_IV_V_VI_1	mandatory	248	1.4e-14	52.2	0.682	0.476	121	238
Asgard	D4998_C1112_H3_Bin_60_scaffold_66156_1	D4998_C1112_H3_Bin_60	Baldrarchaeia	Cas__cas4_I_II_III_IV_V_VI_1	2705	defense-finder-models/Cas/Cas/CAS_Class1-Subtype-I-A	UserReplicon_CAS_Class1-Subtype-I-A_1	1	1	0.333	3	1	Cas__cas4_I_II_III_IV_V_VI_1	accessory	133	3.2e-20	70.5	0.659	0.932	8	131
Asgard	D4998_C1112_H3_Bin_60_scaffold_66156_3	D4998_C1112_H3_Bin_60	Baldrarchaeia	Cas__casR_I_1	2707	defense-finder-models/Cas/Cas/CAS_Class1-Subtype-I-A	UserReplicon_CAS_Class1-Subtype-I-A_1	1	1	0.333	3	1	Cas__casR_I_1	neutral	223	3.5e-26	89.5	0.934	0.865	13	205
Asgard	D4998_C1112_H3_Bin_60_scaffold_66156_4	D4998_C1112_H3_Bin_60	Baldrarchaeia	Cas__csa5gr11_I-A_4	2708	defense-finder-models/Cas/Cas/CAS_Class1-Subtype-I-A	UserReplicon_CAS_Class1-Subtype-I-A_1	1	1	0.333	3	1	Cas__csa5gr11_I-A_3	mandatory	152	3.9e-08	31.1	0.891	0.638	31	127
Asgard	D4998_C1112_H3_Bin_60_scaffold_66156_5	D4998_C1112_H3_Bin_60	Baldrarchaeia	Cas__cas7_I-A_1	2709	defense-finder-models/Cas/Cas/CAS_Class1-Subtype-I-A	UserReplicon_CAS_Class1-Subtype-I-A_1	1	1	0.333	3	1	Cas__cas7_I-A_1	mandatory	205	2.9e-59	198	0.686	0.971	7	205
Asgard	D4998_C1112_H3_Bin_60_scaffold_190687_6	D4998_C1112_H3_Bin_60	Baldrarchaeia	pAgo__pAgo_LongA	1028	defense-finder-models/DefenseFinder_5/pAgo/pAgo	UserReplicon_pAgo_1	1	1	1	1	2	pAgo__pAgo_LongA	mandatory	443	2.2e-15	53.4	0.271	0.442	244	439
Asgard	D4998_C1112_H3_Bin_60_scaffold_190687_7	D4998_C1112_H3_Bin_60	Baldrarchaeia	pAgo__COG1431_pAgo	1029	defense-finder-models/DefenseFinder_5/pAgo/pAgo	UserReplicon_pAgo_1	1	1	1	1	2	pAgo__pAgo_LongA	mandatory	407	7.7e-43	144.5	0.548	0.968	5	398
Asgard	D4998_C1112_H3_Bin_60_scaffold_27122_7	D4998_C1112_H3_Bin_60	Baldrarchaeia	pAgo__pAgo_LongA	1945	defense-finder-models/DefenseFinder_5/pAgo/pAgo	UserReplicon_pAgo_2	1	1	1	1	1	pAgo__pAgo_LongA	mandatory	288	2.6e-32	109.4	0.339	0.941	16	286
Asgard	GBS02-GBS02_214_129_1	GBS02	Baldrarchaeia	Cas__cmr3gr5_III-C_1	1142	defense-finder-models/Cas/Cas/CAS_Class1-Subtype-III-C	UserReplicon_CAS_Class1-Subtype-III-C_4	1	1	0.5	3	1	Cas__cmr3gr5_III-C_1	mandatory	332	3.7e-82	273.4	0.989	0.994	1	330
Asgard	GBS02-GBS02_214_129_2	GBS02	Baldrarchaeia	Cas__cmr5gr11_III-C_11	1143	defense-finder-models/Cas/Cas/CAS_Class1-Subtype-III-C	UserReplicon_CAS_Class1-Subtype-III-C_4	1	1	0.5	3	1	Cas__cmr5gr11_III-C_11	accessory	124	9.6e-29	97.8	0.921	0.944	7	123
Asgard	GBS02-GBS02_214_129_3	GBS02	Baldrarchaeia	Cas__cmr4gr7_III-B_III-C_1	1144	defense-finder-models/Cas/Cas/CAS_Class1-Subtype-III-C	UserReplicon_CAS_Class1-Subtype-III-C_4	1	1	0.5	3	1	Cas__cmr4gr7_III-B_III-C_2	accessory	327	7.3e-31	105.3	0.993	0.927	18	320
Asgard	GBS02-GBS02_289_211_2	GBS02	Baldrarchaeia	Cas__cmr5gr11_III-B_15	1629	defense-finder-models/Cas/Cas/CAS_Class1-Subtype-III-B	UserReplicon_CAS_Class1-Subtype-III-B_3	1	1	0.429	3	1	Cas__cmr5gr11_III-B_18	mandatory	154	2.6e-29	99.7	0.994	0.974	1	150
Asgard	GBS02-GBS02_289_211_3	GBS02	Baldrarchaeia	Cas__cmr1gr7_III-B_III-C_3	1630	defense-finder-models/Cas/Cas/CAS_Class1-Subtype-III-B	UserReplicon_CAS_Class1-Subtype-III-B_3	1	1	0.429	3	1	Cas__cmr1gr7_III-B_III-C_3	accessory	538	2.4e-13	48.1	0.613	0.212	31	144
Asgard	GBS02-GBS02_289_211_4	GBS02	Baldrarchaeia	Cas__cmr6gr7_III-B_3	1631	defense-finder-models/Cas/Cas/CAS_Class1-Subtype-III-B	UserReplicon_CAS_Class1-Subtype-III-B_3	1	1	0.429	3	1	Cas__cmr6gr7_III-B_1	mandatory	275	1.6e-36	123.8	0.914	0.916	16	267
Asgard	GBS02-GBS02_62_338_10	GBS02	Baldrarchaeia	Cas__cas1_I_II_III_IV_V_VI_10	2663	defense-finder-models/Cas/Cas/CAS_Class1-Subtype-I-A	UserReplicon_CAS_Class1-Subtype-I-A_1	1	1	0.889	8	1	Cas__cas1_I_II_III_IV_V_VI_1	accessory	342	2.5e-81	270.4	0.993	0.863	4	298
Asgard	GBS02-GBS02_62_338_11	GBS02	Baldrarchaeia	Cas__cas2_I_II_III_IV_V_VI_5	2664	defense-finder-models/Cas/Cas/CAS_Class1-Subtype-I-A	UserReplicon_CAS_Class1-Subtype-I-A_1	1	1	0.889	8	1	Cas__cas2_I_II_III_IV_V_VI_5	accessory	96	2.2e-22	76.7	0.955	0.885	1	85
Asgard	GBS02-GBS02_62_338_12	GBS02	Baldrarchaeia	Cas__cas4_I_II_III_IV_V_VI_1	2665	defense-finder-models/Cas/Cas/CAS_Class1-Subtype-I-A	UserReplicon_CAS_Class1-Subtype-I-A_1	1	1	0.889	8	1	Cas__cas4_I_II_III_IV_V_VI_1	accessory	220	1.1e-31	107.9	1	0.877	26	218
Asgard	GBS02-GBS02_62_338_2	GBS02	Baldrarchaeia	Cas__casR_I_2	2667	defense-finder-models/Cas/Cas/CAS_Class1-Subtype-I-A	UserReplicon_CAS_Class1-Subtype-I-A_1	1	1	0.889	8	1	Cas__casR_I_1	neutral	224	1.7e-24	83.7	0.904	0.897	9	209
Asgard	GBS02-GBS02_62_338_3	GBS02	Baldrarchaeia	Cas__csa5gr11_I-A_4	2668	defense-finder-models/Cas/Cas/CAS_Class1-Subtype-I-A	UserReplicon_CAS_Class1-Subtype-I-A_1	1	1	0.889	8	1	Cas__csa5gr11_I-A_3	mandatory	135	1e-13	49.1	0.97	0.748	19	119
Asgard	GBS02-GBS02_62_338_4	GBS02	Baldrarchaeia	Cas__cas7_I-A_1	2669	defense-finder-models/Cas/Cas/CAS_Class1-Subtype-I-A	UserReplicon_CAS_Class1-Subtype-I-A_1	1	1	0.889	8	1	Cas__cas7_I-A_1	mandatory	345	7.5e-82	272.2	0.974	0.814	8	288
Asgard	GBS02-GBS02_62_338_5	GBS02	Baldrarchaeia	Cas__cas5_I-A_4	2670	defense-finder-models/Cas/Cas/CAS_Class1-Subtype-I-A	UserReplicon_CAS_Class1-Subtype-I-A_1	1	1	0.889	8	1	Cas__cas5a_I-A_1	mandatory	269	6.1e-23	79.2	0.955	0.665	15	193
Asgard	GBS02-GBS02_62_338_7	GBS02	Baldrarchaeia	Cas__cas3_I_5	2672	defense-finder-models/Cas/Cas/CAS_Class1-Subtype-I-A	UserReplicon_CAS_Class1-Subtype-I-A_1	1	1	0.889	8	1	Cas__cas3_I_5	accessory	582	4.8e-65	217.7	0.491	0.622	27	388
Asgard	GBS02-GBS02_62_338_8	GBS02	Baldrarchaeia	Cas__cas3HD_I_3	2673	defense-finder-models/Cas/Cas/CAS_Class1-Subtype-I-A	UserReplicon_CAS_Class1-Subtype-I-A_1	1	1	0.889	8	1	Cas__cas3HD_I_1	accessory	249	3.9e-19	66.7	0.892	0.896	1	223
Asgard	GBS02-GBS02_62_338_9	GBS02	Baldrarchaeia	Cas__cas4_I_II_III_IV_V_VI_7	2674	defense-finder-models/Cas/Cas/CAS_Class1-Subtype-I-A	UserReplicon_CAS_Class1-Subtype-I-A_1	1	1	0.889	8	1	Cas__cas4_I_II_III_IV_V_VI_1	accessory	295	1.5e-76	255.1	0.966	0.973	7	293
Asgard	GBS02-GBS02_89_367_1	GBS02	Baldrarchaeia	Cas__cas10_III-A_1	3014	defense-finder-models/Cas/Cas/CAS_Class1-Subtype-III-A	UserReplicon_CAS_Class1-Subtype-III-A_2	1	1	0.556	5	1	Cas__cas10_III-A_1	mandatory	809	2.3e-148	493.2	0.998	0.836	9	684
Asgard	GBS02-GBS02_89_367_2	GBS02	Baldrarchaeia	Cas__csm2gr11_III-A_15	3015	defense-finder-models/Cas/Cas/CAS_Class1-Subtype-III-A	UserReplicon_CAS_Class1-Subtype-III-A_2	1	1	0.556	5	1	Cas__csm2gr11_III-A_15	mandatory	140	2.8e-29	99.9	0.982	0.743	34	137
Asgard	GBS02-GBS02_89_367_3	GBS02	Baldrarchaeia	Cas__csm3gr7_III-A_1	3016	defense-finder-models/Cas/Cas/CAS_Class1-Subtype-III-A	UserReplicon_CAS_Class1-Subtype-III-A_2	1	1	0.556	5	1	Cas__csm3gr7_III-A_1	mandatory	260	3.6e-82	272.8	0.991	0.846	11	230
Asgard	GBS02-GBS02_89_367_4	GBS02	Baldrarchaeia	Cas__csm4gr5_III-A_3	3017	defense-finder-models/Cas/Cas/CAS_Class1-Subtype-III-A	UserReplicon_CAS_Class1-Subtype-III-A_2	1	1	0.556	5	1	Cas__csm4gr5_III-A_3	mandatory	340	1.2e-49	166.7	0.968	0.974	6	336
Asgard	GBS02-GBS02_89_367_5	GBS02	Baldrarchaeia	Cas__csm5gr7_III-A_2	3018	defense-finder-models/Cas/Cas/CAS_Class1-Subtype-III-A	UserReplicon_CAS_Class1-Subtype-III-A_2	1	1	0.556	5	1	Cas__csm5gr7_III-A_2	mandatory	360	5.2e-48	161.6	1	0.972	8	357
Asgard	GBS02-GBS02_137_43_5	GBS02	Baldrarchaeia	pAgo__COG1431_pAgo	417	defense-finder-models/DefenseFinder_5/pAgo/pAgo	UserReplicon_pAgo_1	1	1	1	1	1	pAgo__pAgo_LongA	mandatory	837	1.4e-37	127.2	0.839	0.839	119	820
Asgard	GBS03-GBS03_110_14_2	GBS03	Baldrarchaeia	Cas__cas6_I_II_III_IV_V_VI_22	110	defense-finder-models/Cas/Cas/CAS_Class1-Type-III	UserReplicon_CAS_Class1-Type-III_1	1	1	0.1	2	1	Cas__cas6_I_II_III_IV_V_VI_17	accessory	294	7.6e-11	39.8	0.982	0.418	164	286
Asgard	GBS03-GBS03_110_14_3	GBS03	Baldrarchaeia	Cas__csm3gr7_III-A_III-D_2	111	defense-finder-models/Cas/Cas/CAS_Class1-Type-III	UserReplicon_CAS_Class1-Type-III_1	1	1	0.1	2	1	Cas__csm3gr7_III-A_1	mandatory	298	3.6e-22	76.1	0.981	0.829	6	252
Asgard	GBS03-GBS03_113_17_6	GBS03	Baldrarchaeia	Cas__cas2_I_II_III_IV_V_VI_3	128	defense-finder-models/Cas/Cas/CAS_Cluster	UserReplicon_CAS_Cluster_3	1	1	0.04	2	1	Cas__cas2_I_II_III_IV_V_VI_1	mandatory	92	2e-19	66.7	0.937	0.815	4	78
Asgard	GBS03-GBS03_113_17_7	GBS03	Baldrarchaeia	Cas__cas1_I_II_III_IV_V_VI_8	129	defense-finder-models/Cas/Cas/CAS_Cluster	UserReplicon_CAS_Cluster_3	1	1	0.04	2	1	Cas__cas1_I_II_III_IV_V_VI_1	mandatory	134	2.1e-31	106.3	0.402	0.97	1	130
Asgard	GBS04-GBS04_137_43_10	GBS04	Baldrarchaeia	Cas__csm6_III_7	435	defense-finder-models/Cas/Cas/CAS_Cluster	UserReplicon_CAS_Cluster_24	1	1	0.04	2	1	Cas__csm6_III_2	neutral	164	8.6e-08	29.8	0.846	0.677	22	132
Asgard	GBS04-GBS04_137_43_3	GBS04	Baldrarchaeia	Cas__cas2_I_II_III_IV_V_VI_5	438	defense-finder-models/Cas/Cas/CAS_Cluster	UserReplicon_CAS_Cluster_24	1	1	0.04	2	1	Cas__cas2_I_II_III_IV_V_VI_1	mandatory	96	3.3e-19	66.6	0.933	0.865	1	83
Asgard	GBS04-GBS04_137_43_6	GBS04	Baldrarchaeia	Cas__cas2_I_II_III_IV_V_VI_5	441	defense-finder-models/Cas/Cas/CAS_Cluster	UserReplicon_CAS_Cluster_24	1	1	0.04	2	1	Cas__cas2_I_II_III_IV_V_VI_1	mandatory	91	9.1e-18	62	0.933	0.912	1	83
Asgard	GBS04-GBS04_137_43_7	GBS04	Baldrarchaeia	Cas__cas4_I_II_III_IV_V_VI_1	442	defense-finder-models/Cas/Cas/CAS_Cluster	UserReplicon_CAS_Cluster_24	1	1	0.04	2	1	Cas__cas4_I_II_III_IV_V_VI_1	mandatory	245	5e-15	53.7	0.682	0.469	121	235
Asgard	GBS04-GBS04_144_51_1	GBS04	Baldrarchaeia	Cas__cas7_I-B_6	523	defense-finder-models/Cas/Cas/CAS_Class1-Subtype-I-B	UserReplicon_CAS_Class1-Subtype-I-B_4	1	1	0.25	2	1	Cas__cas7_I-B_6	mandatory	292	1.4e-27	94.3	0.561	0.616	2	181
Asgard	GBS04-GBS04_144_51_5	GBS04	Baldrarchaeia	Cas__cas3_I_2	527	defense-finder-models/Cas/Cas/CAS_Class1-Subtype-I-B	UserReplicon_CAS_Class1-Subtype-I-B_4	1	1	0.25	2	1	Cas__cas3_I_5	accessory	717	7.3e-58	193.9	0.975	0.47	226	562
Asgard	GBS04-GBS04_24_157_11	GBS04	Baldrarchaeia	Cas__cas5_I-A_4	1564	defense-finder-models/Cas/Cas/CAS_Cluster	UserReplicon_CAS_Cluster_25	1	1	0.16	8	1	Cas__cas5a_I-A_1	mandatory	243	1.3e-18	65.1	0.838	0.667	3	164
Asgard	GBS04-GBS04_24_157_12	GBS04	Baldrarchaeia	Cas__cas7_I-A_1	1565	defense-finder-models/Cas/Cas/CAS_Cluster	UserReplicon_CAS_Cluster_25	1	1	0.16	8	1	Cas__cas7_I-A_1	mandatory	346	2.3e-81	270.7	0.985	0.821	7	290
Asgard	GBS04-GBS04_24_157_13	GBS04	Baldrarchaeia	Cas__csa5gr11_I-A_4	1566	defense-finder-models/Cas/Cas/CAS_Cluster	UserReplicon_CAS_Cluster_25	1	1	0.16	8	1	Cas__csa5gr11_I-A_3	mandatory	158	4.8e-08	31	0.881	0.608	38	133
Asgard	GBS04-GBS04_24_157_14	GBS04	Baldrarchaeia	Cas__casR_I_2	1567	defense-finder-models/Cas/Cas/CAS_Cluster	UserReplicon_CAS_Cluster_25	1	1	0.16	8	1	Cas__casR_I_1	neutral	223	7.2e-27	91.5	0.862	0.865	12	204
Asgard	GBS04-GBS04_24_157_15	GBS04	Baldrarchaeia	Cas__cas4_I_II_III_IV_V_VI_1	1568	defense-finder-models/Cas/Cas/CAS_Cluster	UserReplicon_CAS_Cluster_25	1	1	0.16	8	1	Cas__cas4_I_II_III_IV_V_VI_1	mandatory	202	4.1e-32	109.4	0.989	0.911	17	200
Asgard	GBS04-GBS04_24_157_16	GBS04	Baldrarchaeia	Cas__cmr3gr5_III-C_1	1569	defense-finder-models/Cas/Cas/CAS_Cluster	UserReplicon_CAS_Cluster_25	1	1	0.16	8	1	Cas__cmr3gr5_III-B_III-C_5	mandatory	272	4.2e-33	112.5	0.863	0.868	1	236
Asgard	GBS04-GBS04_24_157_18	GBS04	Baldrarchaeia	Cas__cmr4gr7_III-B_III-C_2	1571	defense-finder-models/Cas/Cas/CAS_Cluster	UserReplicon_CAS_Cluster_25	1	1	0.16	8	1	Cas__cmr4gr7_III-B_III-C_2	mandatory	359	3.4e-40	136	0.971	0.944	10	348
Asgard	GBS04-GBS04_24_157_2	GBS04	Baldrarchaeia	Cas__cas2_I_II_III_IV_V_VI_3	1573	defense-finder-models/Cas/Cas/CAS_Cluster	UserReplicon_CAS_Cluster_25	1	1	0.16	8	1	Cas__cas2_I_II_III_IV_V_VI_1	mandatory	92	2.9e-19	66.7	0.937	0.815	4	78
Asgard	GBS04-GBS04_24_157_22	GBS04	Baldrarchaeia	Cas__cmr1gr7_III-B_III-C_3	1576	defense-finder-models/Cas/Cas/CAS_Cluster	UserReplicon_CAS_Cluster_25	1	1	0.16	8	1	Cas__cmr1gr7_III-B_1	mandatory	354	2.4e-09	35.1	0.948	0.469	6	171
Asgard	GBS04-GBS04_33_246_11	GBS04	Baldrarchaeia	Cas__csm3gr7_III-A_III-D_2	2220	defense-finder-models/Cas/Cas/CAS_Class1-Subtype-III-D	UserReplicon_CAS_Class1-Subtype-III-D_10	1	1	0.5	4	1	Cas__csm3gr7_III-A_III-D_10	accessory	299	1.9e-47	159.2	0.991	0.742	14	235
Asgard	GBS04-GBS04_33_246_12	GBS04	Baldrarchaeia	Cas__csm3gr7_III-A_III-D_2	2221	defense-finder-models/Cas/Cas/CAS_Class1-Subtype-III-D	UserReplicon_CAS_Class1-Subtype-III-D_10	1	1	0.5	4	1	Cas__csm3gr7_III-A_III-D_10	accessory	257	6.3e-32	108.5	0.972	0.821	16	226
Asgard	GBS04-GBS04_33_246_13	GBS04	Baldrarchaeia	Cas__csm2gr11_III-D_8	2222	defense-finder-models/Cas/Cas/CAS_Class1-Subtype-III-D	UserReplicon_CAS_Class1-Subtype-III-D_10	1	1	0.5	4	1	Cas__csm2gr11_III-D_5	mandatory	125	2.5e-15	54.2	0.9	0.936	4	120
Asgard	GBS04-GBS04_33_246_15	GBS04	Baldrarchaeia	Cas__csx1_III_8	2224	defense-finder-models/Cas/Cas/CAS_Class1-Subtype-III-D	UserReplicon_CAS_Class1-Subtype-III-D_10	1	1	0.5	4	1	Cas__csx1_III_10	accessory	514	1e-59	200.3	0.963	0.909	29	495
Asgard	GBS04-GBS04_33_246_4	GBS04	Baldrarchaeia	Cas__cas6_I_II_III_IV_V_VI_22	2228	defense-finder-models/Cas/Cas/CAS_Class1-Subtype-III-D	UserReplicon_CAS_Class1-Subtype-III-D_10	1	1	0.5	4	1	Cas__cas6_I_II_III_IV_V_VI_17	accessory	294	1.1e-10	39.8	0.982	0.418	164	286
Asgard	GBS04-GBS04_33_246_5	GBS04	Baldrarchaeia	Cas__csm3gr7_III-A_III-D_2	2229	defense-finder-models/Cas/Cas/CAS_Class1-Subtype-III-D	UserReplicon_CAS_Class1-Subtype-III-D_10	1	1	0.5	4	1	Cas__csm3gr7_III-A_III-D_10	accessory	298	5e-22	76.1	0.981	0.829	6	252
Asgard	GBS04-GBS04_43_257_11	GBS04	Baldrarchaeia	Cas__csm3gr7_III-A_III-D_2	2464	defense-finder-models/Cas/Cas/CAS_Class1-Subtype-III-D	UserReplicon_CAS_Class1-Subtype-III-D_11	1	1	0.375	3	1	Cas__csm3gr7_III-A_III-D_10	accessory	299	1.7e-49	165.9	0.986	0.739	14	234
Asgard	GBS04-GBS04_43_257_12	GBS04	Baldrarchaeia	Cas__csm3gr7_III-A_III-D_2	2465	defense-finder-models/Cas/Cas/CAS_Class1-Subtype-III-D	UserReplicon_CAS_Class1-Subtype-III-D_11	1	1	0.375	3	1	Cas__csm3gr7_III-A_III-D_10	accessory	252	3.7e-33	112.5	0.972	0.829	13	221
Asgard	GBS04-GBS04_43_257_13	GBS04	Baldrarchaeia	Cas__csm2gr11_III-D_8	2466	defense-finder-models/Cas/Cas/CAS_Class1-Subtype-III-D	UserReplicon_CAS_Class1-Subtype-III-D_11	1	1	0.375	3	1	Cas__csm2gr11_III-D_5	mandatory	129	5.1e-14	49.9	0.9	0.938	4	124
Asgard	GBS04-GBS04_43_257_14	GBS04	Baldrarchaeia	Cas__csx1_III_19	2467	defense-finder-models/Cas/Cas/CAS_Class1-Subtype-III-D	UserReplicon_CAS_Class1-Subtype-III-D_11	1	1	0.375	3	1	Cas__csx1_III_10	accessory	445	3.9e-71	238.2	1	0.892	5	401
Asgard	GBS04-GBS04_43_257_4	GBS04	Baldrarchaeia	Cas__cas6_I_II_III_IV_V_VI_22	2473	defense-finder-models/Cas/Cas/CAS_Class1-Subtype-III-D	UserReplicon_CAS_Class1-Subtype-III-D_12	1	1	0.375	3	1	Cas__cas6_I_II_III_IV_V_VI_17	accessory	294	1.4e-10	39.3	0.982	0.418	164	286
Asgard	GBS04-GBS04_43_257_5	GBS04	Baldrarchaeia	Cas__csm3gr7_III-A_III-D_2	2474	defense-finder-models/Cas/Cas/CAS_Class1-Subtype-III-D	UserReplicon_CAS_Class1-Subtype-III-D_12	1	1	0.375	3	1	Cas__csm3gr7_III-A_III-D_10	accessory	302	7.8e-21	72.2	0.981	0.831	6	256
Asgard	GBS04-GBS04_43_257_6	GBS04	Baldrarchaeia	Cas__csx10gr5_III-D_2	2475	defense-finder-models/Cas/Cas/CAS_Class1-Subtype-III-D	UserReplicon_CAS_Class1-Subtype-III-D_12	1	1	0.375	3	1	Cas__csx10gr5_III-D_3	mandatory	385	1.3e-15	55.4	0.946	0.951	18	383
Asgard	GBS04-GBS04_45_259_2	GBS04	Baldrarchaeia	Cas__cas10_III_1	2495	defense-finder-models/Cas/Cas/CAS_Class1-Subtype-III-B	UserReplicon_CAS_Class1-Subtype-III-B_8	1	1	0.714	5	1	Cas__cas10_III_1	accessory	1160	5.2e-44	148.5	0.953	0.615	199	911
Asgard	GBS04-GBS04_45_259_3	GBS04	Baldrarchaeia	Cas__cmr3gr5_III-B_III-C_5	2496	defense-finder-models/Cas/Cas/CAS_Class1-Subtype-III-B	UserReplicon_CAS_Class1-Subtype-III-B_8	1	1	0.714	5	1	Cas__cmr3gr5_III-B_III-C_5	accessory	405	2.5e-28	97.1	0.902	0.859	19	366
Asgard	GBS04-GBS04_45_259_4	GBS04	Baldrarchaeia	Cas__cmr4gr7_III-B_III-C_2	2497	defense-finder-models/Cas/Cas/CAS_Class1-Subtype-III-B	UserReplicon_CAS_Class1-Subtype-III-B_8	1	1	0.714	5	1	Cas__cmr4gr7_III-B_III-C_2	accessory	349	5.9e-50	168	0.977	0.943	16	344
Asgard	GBS04-GBS04_45_259_6	GBS04	Baldrarchaeia	Cas__cmr4gr7_III-B_III-C_1	2499	defense-finder-models/Cas/Cas/CAS_Class1-Subtype-III-B	UserReplicon_CAS_Class1-Subtype-III-B_8	1	1	0.714	5	1	Cas__cmr4gr7_III-B_III-C_2	accessory	481	4e-22	76.7	0.982	0.649	9	320
Asgard	GBS04-GBS04_45_259_7	GBS04	Baldrarchaeia	Cas__cmr6gr7_III-B_3	2500	defense-finder-models/Cas/Cas/CAS_Class1-Subtype-III-B	UserReplicon_CAS_Class1-Subtype-III-B_8	1	1	0.714	5	1	Cas__cmr6gr7_III-B_1	mandatory	328	4.1e-27	93	0.887	0.896	26	319
Asgard	GBS04-GBS04_45_259_8	GBS04	Baldrarchaeia	Cas__cmr1gr7_III-B_III-C_3	2501	defense-finder-models/Cas/Cas/CAS_Class1-Subtype-III-B	UserReplicon_CAS_Class1-Subtype-III-B_8	1	1	0.714	5	1	Cas__cmr1gr7_III-B_III-C_3	accessory	504	1.2e-06	26.3	0.948	0.433	10	227
Asgard	GBS04-GBS04_49_263_10	GBS04	Baldrarchaeia	Cas__csm3gr7_III-A_III-D_10	2548	defense-finder-models/Cas/Cas/CAS_Class1-Subtype-III-A	UserReplicon_CAS_Class1-Subtype-III-A_5	1	1	0.222	2	1	Cas__csm3gr7_III-A_III-D_10	accessory	338	4.8e-57	190.9	0.883	0.817	12	287
Asgard	GBS04-GBS04_49_263_11	GBS04	Baldrarchaeia	Cas__csm2gr11_III-A_12	2549	defense-finder-models/Cas/Cas/CAS_Class1-Subtype-III-A	UserReplicon_CAS_Class1-Subtype-III-A_5	1	1	0.222	2	1	Cas__csm2gr11_III-A_15	mandatory	137	1.5e-15	55.1	0.839	0.92	6	131
Asgard	GBS04-GBS04_49_263_3	GBS04	Baldrarchaeia	Cas__csm6_III_3	2554	defense-finder-models/Cas/Cas/CAS_Class1-Subtype-III-A	UserReplicon_CAS_Class1-Subtype-III-A_6	1	1	0.556	5	1	Cas__csm6_III_2	accessory	270	1.2e-37	126.6	0.924	0.633	48	218
Asgard	GBS04-GBS04_49_263_4	GBS04	Baldrarchaeia	Cas__csx1_III_20	2555	defense-finder-models/Cas/Cas/CAS_Class1-Subtype-III-A	UserReplicon_CAS_Class1-Subtype-III-A_6	1	1	0.556	5	1	Cas__csx1_III_10	accessory	226	7.3e-26	88.8	0.934	0.805	11	192
Asgard	GBS04-GBS04_49_263_7	GBS04	Baldrarchaeia	Cas__cas10_III-A_1	2558	defense-finder-models/Cas/Cas/CAS_Class1-Subtype-III-A	UserReplicon_CAS_Class1-Subtype-III-A_6	1	1	0.556	5	1	Cas__cas10_III-A_1	mandatory	908	2.3e-59	199.2	0.669	0.529	8	487
Asgard	GBS04-GBS04_49_263_8	GBS04	Baldrarchaeia	Cas__csm5gr7_III-A_4	2559	defense-finder-models/Cas/Cas/CAS_Class1-Subtype-III-A	UserReplicon_CAS_Class1-Subtype-III-A_6	1	1	0.556	5	1	Cas__csm5gr7_III-A_2	mandatory	407	1.7e-24	84.1	0.946	0.885	6	365
Asgard	GBS04-GBS04_49_263_9	GBS04	Baldrarchaeia	Cas__csm4gr5_III-A_1	2560	defense-finder-models/Cas/Cas/CAS_Class1-Subtype-III-A	UserReplicon_CAS_Class1-Subtype-III-A_6	1	1	0.556	5	1	Cas__csm4gr5_III-A_3	mandatory	377	1e-25	88.2	0.9	0.865	6	331
Asgard	GBS04-GBS04_80_298_11	GBS04	Baldrarchaeia	Cas__casR_I_2	3088	defense-finder-models/Cas/Cas/CAS_Class1-Subtype-I-A	UserReplicon_CAS_Class1-Subtype-I-A_2	1	1	0.556	5	1	Cas__casR_I_1	neutral	216	5e-38	128	0.904	0.926	5	204
Asgard	GBS04-GBS04_80_298_4	GBS04	Baldrarchaeia	Cas__cas6_I_II_III_IV_V_VI_22	3092	defense-finder-models/Cas/Cas/CAS_Class1-Subtype-I-A	UserReplicon_CAS_Class1-Subtype-I-A_2	1	1	0.556	5	1	Cas__cas6_I-A_III-D_3	accessory	284	3.2e-12	44.6	1	0.461	147	277
Asgard	GBS04-GBS04_80_298_6	GBS04	Baldrarchaeia	Cas__cas3_I_5	3094	defense-finder-models/Cas/Cas/CAS_Class1-Subtype-I-A	UserReplicon_CAS_Class1-Subtype-I-A_2	1	1	0.556	5	1	Cas__cas3_I_5	accessory	603	1.1e-67	226.5	0.591	0.711	37	465
Asgard	GBS04-GBS04_80_298_7	GBS04	Baldrarchaeia	Cas__cas8a2_I-A_3	3095	defense-finder-models/Cas/Cas/CAS_Class1-Subtype-I-A	UserReplicon_CAS_Class1-Subtype-I-A_2	1	1	0.556	5	1	Cas__cas8a1_I-A_1	mandatory	381	3.8e-25	86.7	0.961	0.95	2	363
Asgard	GBS04-GBS04_80_298_8	GBS04	Baldrarchaeia	Cas__cas5_I-A_4	3096	defense-finder-models/Cas/Cas/CAS_Class1-Subtype-I-A	UserReplicon_CAS_Class1-Subtype-I-A_2	1	1	0.556	5	1	Cas__cas5a_I-A_1	mandatory	270	1.2e-18	65.3	0.95	0.689	12	197
Asgard	GBS04-GBS04_80_298_9	GBS04	Baldrarchaeia	Cas__cas7_I-A_1	3097	defense-finder-models/Cas/Cas/CAS_Class1-Subtype-I-A	UserReplicon_CAS_Class1-Subtype-I-A_2	1	1	0.556	5	1	Cas__cas7_I-A_1	mandatory	318	8e-63	209.9	0.996	0.796	7	259
Asgard	GBS04-GBS04_94_313_2	GBS04	Baldrarchaeia	Cas__casR_I_2	3288	defense-finder-models/Cas/Cas/CAS_Class1-Subtype-I-A	UserReplicon_CAS_Class1-Subtype-I-A_3	1	1	0.556	5	1	Cas__casR_I_1	neutral	236	3.1e-25	86.2	0.963	0.911	20	234
Asgard	GBS04-GBS04_94_313_3	GBS04	Baldrarchaeia	Cas__csa5gr11_I-A_4	3289	defense-finder-models/Cas/Cas/CAS_Class1-Subtype-I-A	UserReplicon_CAS_Class1-Subtype-I-A_3	1	1	0.556	5	1	Cas__csa5gr11_I-A_3	mandatory	166	6.2e-12	43.4	0.95	0.831	24	161
Asgard	GBS04-GBS04_94_313_4	GBS04	Baldrarchaeia	Cas__cas7_I-A_1	3290	defense-finder-models/Cas/Cas/CAS_Class1-Subtype-I-A	UserReplicon_CAS_Class1-Subtype-I-A_3	1	1	0.556	5	1	Cas__cas7_I-A_1	mandatory	335	5e-83	276.1	0.982	0.833	9	287
Asgard	GBS04-GBS04_94_313_5	GBS04	Baldrarchaeia	Cas__cas5_I-A_4	3291	defense-finder-models/Cas/Cas/CAS_Class1-Subtype-I-A	UserReplicon_CAS_Class1-Subtype-I-A_3	1	1	0.556	5	1	Cas__cas5a_I-A_1	mandatory	283	4.1e-28	96.1	0.989	0.664	5	192
Asgard	GBS04-GBS04_94_313_7	GBS04	Baldrarchaeia	Cas__cas3_I_5	3293	defense-finder-models/Cas/Cas/CAS_Class1-Subtype-I-A	UserReplicon_CAS_Class1-Subtype-I-A_3	1	1	0.556	5	1	Cas__cas3_I_5	accessory	601	1.2e-59	200	0.503	0.646	29	416
Asgard	GBS04-GBS04_94_313_8	GBS04	Baldrarchaeia	Cas__cas3HD_I_2	3294	defense-finder-models/Cas/Cas/CAS_Class1-Subtype-I-A	UserReplicon_CAS_Class1-Subtype-I-A_3	1	1	0.556	5	1	Cas__cas3HD_I_1	accessory	269	6.9e-19	66	0.947	0.814	21	239
Asgard	GBS04-GBS04_9_308_6	GBS04	Baldrarchaeia	Cas__csm4gr5_III-A_1	3361	defense-finder-models/Cas/Cas/CAS_Class1-Subtype-III-A	UserReplicon_CAS_Class1-Subtype-III-A_7	1	1	0.222	2	1	Cas__csm4gr5_III-A_3	mandatory	265	1.3e-09	35.4	0.505	0.581	99	252
Asgard	GBS04-GBS04_9_308_7	GBS04	Baldrarchaeia	Cas__csm3gr7_III-A_III-D_10	3362	defense-finder-models/Cas/Cas/CAS_Class1-Subtype-III-A	UserReplicon_CAS_Class1-Subtype-III-A_7	1	1	0.222	2	1	Cas__csm3gr7_III-A_III-D_10	accessory	306	5.1e-21	72.8	0.793	0.797	27	270
Asgard	GBS04-GBS04_21_124_17	GBS04	Baldrarchaeia	RM__Type_I_MTases	1323	defense-finder-models/RM/RM/RM_Type_I	UserReplicon_RM_Type_I_1	1	1	1	2.5	1	RM__Type_I_MTases	mandatory	529	1.1e-150	500.5	0.986	0.941	22	519
Asgard	GBS04-GBS04_21_124_18	GBS04	Baldrarchaeia	RM__Type_I_S	1324	defense-finder-models/RM/RM/RM_Type_I	UserReplicon_RM_Type_I_1	1	1	1	2.5	1	RM__Type_I_S	accessory	594	1.6e-73	246	0.511	0.966	15	588
Asgard	GBS04-GBS04_21_124_20	GBS04	Baldrarchaeia	RM__Type_I_REases	1327	defense-finder-models/RM/RM/RM_Type_I	UserReplicon_RM_Type_I_1	1	1	1	2.5	1	RM__Type_I_REases	mandatory	999	1.3e-167	557.6	0.995	0.984	1	983
Asgard	GBS04-GBS04_21_124_9	GBS04	Baldrarchaeia	pAgo__pAgo_LongB	1335	defense-finder-models/DefenseFinder_5/pAgo/pAgo	UserReplicon_pAgo_1	1	1	1	1	1	pAgo__pAgo_LongA	mandatory	442	1.4e-62	209.7	0.594	0.977	11	442
Asgard	GBS04-GBS04_227_143_4	GBS04	Baldrarchaeia	pAgo__COG1431_pAgo	1384	defense-finder-models/DefenseFinder_5/pAgo/pAgo	UserReplicon_pAgo_2	1	1	1	1	2	pAgo__pAgo_LongA	mandatory	407	6.8e-43	144.8	0.548	0.968	5	398
Asgard	GBS04-GBS04_227_143_5	GBS04	Baldrarchaeia	pAgo__pAgo_LongA	1385	defense-finder-models/DefenseFinder_5/pAgo/pAgo	UserReplicon_pAgo_2	1	1	1	1	2	pAgo__pAgo_LongA	mandatory	252	4.8e-16	55.7	0.271	0.778	53	248
Asgard	GBS04-GBS04_315_241_1	GBS04	Baldrarchaeia	pAgo__COG1431_pAgo	2165	defense-finder-models/DefenseFinder_5/pAgo/pAgo	UserReplicon_pAgo_3	1	1	1	1	1	pAgo__pAgo_LongA	mandatory	229	8.5e-20	68.5	0.29	0.974	7	229
Asgard	GBS04-GBS04_88_306_3	GBS04	Baldrarchaeia	pAgo__pAgo_LongB	3181	defense-finder-models/DefenseFinder_5/pAgo/pAgo	UserReplicon_pAgo_4	1	1	1	1	1	pAgo__pAgo_LongA	mandatory	442	8e-62	207.2	0.592	0.975	12	442
Asgard	GCA_016840465_1_ASM1684046v1-JAEOSH010000074.1_73_5	GCA_016840465_1_ASM1684046v1	Baldrarchaeia	Cas__cas2_I_II_III_IV_V_VI_5	2371	defense-finder-models/Cas/Cas/CAS_Cluster	UserReplicon_CAS_Cluster_1	1	1	0.04	2	1	Cas__cas2_I_II_III_IV_V_VI_1	mandatory	96	2.5e-19	66.6	0.933	0.865	1	83
Asgard	GCA_016840465_1_ASM1684046v1-JAEOSH010000074.1_73_8	GCA_016840465_1_ASM1684046v1	Baldrarchaeia	Cas__cas2_I_II_III_IV_V_VI_5	2374	defense-finder-models/Cas/Cas/CAS_Cluster	UserReplicon_CAS_Cluster_1	1	1	0.04	2	1	Cas__cas2_I_II_III_IV_V_VI_1	mandatory	91	6.8e-18	62	0.933	0.912	1	83
Asgard	GCA_016840465_1_ASM1684046v1-JAEOSH010000074.1_73_9	GCA_016840465_1_ASM1684046v1	Baldrarchaeia	Cas__cas4_I_II_III_IV_V_VI_1	2375	defense-finder-models/Cas/Cas/CAS_Cluster	UserReplicon_CAS_Cluster_1	1	1	0.04	2	1	Cas__cas4_I_II_III_IV_V_VI_1	mandatory	248	1.1e-14	52.2	0.682	0.476	121	238
Asgard	GCA_016840465_1_ASM1684046v1-JAEOSH010000084.1_97_1	GCA_016840465_1_ASM1684046v1	Baldrarchaeia	pAgo__pAgo_LongA	2435	defense-finder-models/DefenseFinder_5/pAgo/pAgo	UserReplicon_pAgo_1	1	1	1	1	1	pAgo__pAgo_LongA	mandatory	322	2.8e-41	138.7	0.408	0.947	18	322
Asgard	GCA_016840485_1_ASM1684048v1-JAEOSG010000078.1_59_10	GCA_016840485_1_ASM1684048v1	Baldrarchaeia	Cas__cas1_I_II_III_IV_V_VI_10	2062	defense-finder-models/Cas/Cas/CAS_Class1-Subtype-I-A	UserReplicon_CAS_Class1-Subtype-I-A_1	1	1	0.889	8	1	Cas__cas1_I_II_III_IV_V_VI_1	accessory	342	2.9e-81	270.4	0.993	0.863	4	298
Asgard	GCA_016840485_1_ASM1684048v1-JAEOSG010000078.1_59_11	GCA_016840485_1_ASM1684048v1	Baldrarchaeia	Cas__cas2_I_II_III_IV_V_VI_5	2063	defense-finder-models/Cas/Cas/CAS_Class1-Subtype-I-A	UserReplicon_CAS_Class1-Subtype-I-A_1	1	1	0.889	8	1	Cas__cas2_I_II_III_IV_V_VI_5	accessory	96	2.5e-22	76.7	0.955	0.885	1	85
Asgard	GCA_016840485_1_ASM1684048v1-JAEOSG010000078.1_59_12	GCA_016840485_1_ASM1684048v1	Baldrarchaeia	Cas__cas4_I_II_III_IV_V_VI_1	2064	defense-finder-models/Cas/Cas/CAS_Class1-Subtype-I-A	UserReplicon_CAS_Class1-Subtype-I-A_1	1	1	0.889	8	1	Cas__cas4_I_II_III_IV_V_VI_1	accessory	220	1.3e-31	107.9	1	0.877	26	218
Asgard	GCA_016840485_1_ASM1684048v1-JAEOSG010000078.1_59_2	GCA_016840485_1_ASM1684048v1	Baldrarchaeia	Cas__casR_I_2	2067	defense-finder-models/Cas/Cas/CAS_Class1-Subtype-I-A	UserReplicon_CAS_Class1-Subtype-I-A_1	1	1	0.889	8	1	Cas__casR_I_1	neutral	224	4e-24	82.7	0.904	0.897	9	209
Asgard	GCA_016840485_1_ASM1684048v1-JAEOSG010000078.1_59_3	GCA_016840485_1_ASM1684048v1	Baldrarchaeia	Cas__csa5gr11_I-A_4	2068	defense-finder-models/Cas/Cas/CAS_Class1-Subtype-I-A	UserReplicon_CAS_Class1-Subtype-I-A_1	1	1	0.889	8	1	Cas__csa5gr11_I-A_3	mandatory	135	1.2e-13	49.1	0.97	0.748	19	119
Asgard	GCA_016840485_1_ASM1684048v1-JAEOSG010000078.1_59_4	GCA_016840485_1_ASM1684048v1	Baldrarchaeia	Cas__cas7_I-A_1	2069	defense-finder-models/Cas/Cas/CAS_Class1-Subtype-I-A	UserReplicon_CAS_Class1-Subtype-I-A_1	1	1	0.889	8	1	Cas__cas7_I-A_1	mandatory	345	8.6e-82	272.2	0.974	0.814	8	288
Asgard	GCA_016840485_1_ASM1684048v1-JAEOSG010000078.1_59_5	GCA_016840485_1_ASM1684048v1	Baldrarchaeia	Cas__cas5_I-A_4	2070	defense-finder-models/Cas/Cas/CAS_Class1-Subtype-I-A	UserReplicon_CAS_Class1-Subtype-I-A_1	1	1	0.889	8	1	Cas__cas5a_I-A_1	mandatory	269	7e-23	79.2	0.955	0.665	15	193
Asgard	GCA_016840485_1_ASM1684048v1-JAEOSG010000078.1_59_7	GCA_016840485_1_ASM1684048v1	Baldrarchaeia	Cas__cas3_I_5	2072	defense-finder-models/Cas/Cas/CAS_Class1-Subtype-I-A	UserReplicon_CAS_Class1-Subtype-I-A_1	1	1	0.889	8	1	Cas__cas3_I_5	accessory	582	5.6e-65	217.7	0.491	0.622	27	388
Asgard	GCA_016840485_1_ASM1684048v1-JAEOSG010000078.1_59_8	GCA_016840485_1_ASM1684048v1	Baldrarchaeia	Cas__cas3HD_I_3	2073	defense-finder-models/Cas/Cas/CAS_Class1-Subtype-I-A	UserReplicon_CAS_Class1-Subtype-I-A_1	1	1	0.889	8	1	Cas__cas3HD_I_1	accessory	249	4.4e-19	66.7	0.892	0.896	1	223
Asgard	GCA_016840485_1_ASM1684048v1-JAEOSG010000078.1_59_9	GCA_016840485_1_ASM1684048v1	Baldrarchaeia	Cas__cas4_I_II_III_IV_V_VI_7	2074	defense-finder-models/Cas/Cas/CAS_Class1-Subtype-I-A	UserReplicon_CAS_Class1-Subtype-I-A_1	1	1	0.889	8	1	Cas__cas4_I_II_III_IV_V_VI_1	accessory	295	1.7e-76	255.1	0.966	0.973	7	293
Asgard	GCA_016840485_1_ASM1684048v1-JAEOSG010000128.1_221_7	GCA_016840485_1_ASM1684048v1	Baldrarchaeia	Cas__csm5gr7_III-A_2	2617	defense-finder-models/Cas/Cas/CAS_Class1-Subtype-III-A	UserReplicon_CAS_Class1-Subtype-III-A_2	1	1	0.222	2	1	Cas__csm5gr7_III-A_2	mandatory	360	6e-48	161.6	1	0.972	8	357
Asgard	GCA_016840485_1_ASM1684048v1-JAEOSG010000128.1_221_8	GCA_016840485_1_ASM1684048v1	Baldrarchaeia	Cas__csm4gr5_III-A_3	2618	defense-finder-models/Cas/Cas/CAS_Class1-Subtype-III-A	UserReplicon_CAS_Class1-Subtype-III-A_2	1	1	0.222	2	1	Cas__csm4gr5_III-A_3	mandatory	340	1.4e-49	166.7	0.968	0.974	6	336
Asgard	GCA_016840485_1_ASM1684048v1-JAEOSG010000137.1_232_3	GCA_016840485_1_ASM1684048v1	Baldrarchaeia	Cas__cas2_I_II_III_IV_V_VI_13	2692	defense-finder-models/Cas/Cas/CAS_Cluster	UserReplicon_CAS_Cluster_9	1	1	0.04	2	1	Cas__cas2_I_II_III_IV_V_VI_1	mandatory	92	3.9e-20	69.6	0.986	0.772	1	71
Asgard	GCA_016840485_1_ASM1684048v1-JAEOSG010000137.1_232_7	GCA_016840485_1_ASM1684048v1	Baldrarchaeia	Cas__cas1_I_II_III_IV_V_VI_1	2696	defense-finder-models/Cas/Cas/CAS_Cluster	UserReplicon_CAS_Cluster_9	1	1	0.04	2	1	Cas__cas1_I_II_III_IV_V_VI_1	mandatory	323	4.1e-59	197.9	0.975	0.938	8	310
Asgard	GCA_016840485_1_ASM1684048v1-JAEOSG010000212.1_11_1	GCA_016840485_1_ASM1684048v1	Baldrarchaeia	Cas__csm3gr7_III-A_1	3170	defense-finder-models/Cas/Cas/CAS_Class1-Subtype-III-A	UserReplicon_CAS_Class1-Subtype-III-A_3	1	1	0.333	3	1	Cas__csm3gr7_III-A_1	mandatory	260	5.4e-82	272.5	0.991	0.846	11	230
Asgard	GCA_016840485_1_ASM1684048v1-JAEOSG010000212.1_11_2	GCA_016840485_1_ASM1684048v1	Baldrarchaeia	Cas__csm2gr11_III-A_15	3171	defense-finder-models/Cas/Cas/CAS_Class1-Subtype-III-A	UserReplicon_CAS_Class1-Subtype-III-A_3	1	1	0.333	3	1	Cas__csm2gr11_III-A_15	mandatory	140	3.2e-29	99.9	0.982	0.743	34	137
Asgard	GCA_016840485_1_ASM1684048v1-JAEOSG010000212.1_11_3	GCA_016840485_1_ASM1684048v1	Baldrarchaeia	Cas__cas10_III-A_1	3172	defense-finder-models/Cas/Cas/CAS_Class1-Subtype-III-A	UserReplicon_CAS_Class1-Subtype-III-A_3	1	1	0.333	3	1	Cas__cas10_III-A_1	mandatory	809	3.6e-147	489.4	0.998	0.836	9	684
Asgard	GCA_016840485_1_ASM1684048v1-JAEOSG010000252.1_75_1	GCA_016840485_1_ASM1684048v1	Baldrarchaeia	Cas__cas4_I_II_III_IV_V_VI_1	3351	defense-finder-models/Cas/Cas/CAS_Cluster	UserReplicon_CAS_Cluster_11	1	1	0.04	2	1	Cas__cas4_I_II_III_IV_V_VI_1	mandatory	243	2.1e-15	55.1	0.715	0.519	113	238
Asgard	GCA_016840485_1_ASM1684048v1-JAEOSG010000252.1_75_4	GCA_016840485_1_ASM1684048v1	Baldrarchaeia	Cas__cas2_I_II_III_IV_V_VI_5	3354	defense-finder-models/Cas/Cas/CAS_Cluster	UserReplicon_CAS_Cluster_11	1	1	0.04	2	1	Cas__cas2_I_II_III_IV_V_VI_1	mandatory	92	6.3e-16	56.2	0.876	0.848	5	82
Asgard	GCA_016840485_1_ASM1684048v1-JAEOSG010000137.1_232_4	GCA_016840485_1_ASM1684048v1	Baldrarchaeia	pAgo__COG1431_pAgo	2693	defense-finder-models/DefenseFinder_5/pAgo/pAgo	UserReplicon_pAgo_1	1	1	1	1	2	pAgo__pAgo_LongA	mandatory	429	3.3e-14	50.1	0.417	0.723	105	414
Asgard	GCA_016840485_1_ASM1684048v1-JAEOSG010000137.1_232_5	GCA_016840485_1_ASM1684048v1	Baldrarchaeia	pAgo__pAgo_LongA	2694	defense-finder-models/DefenseFinder_5/pAgo/pAgo	UserReplicon_pAgo_1	1	1	1	1	2	pAgo__pAgo_LongA	mandatory	406	2.7e-50	169.1	0.423	0.776	92	406
Asgard	GCA_016840485_1_ASM1684048v1-JAEOSG010000069.1_17_10	GCA_016840485_1_ASM1684048v1	Baldrarchaeia	Lamassu-Fam__LmuA_effector_Hydrolase	1946	defense-finder-models/DefenseFinder_1/Lamassu-Fam/Lamassu-Fam	UserReplicon_Lamassu-Fam_1	1	1	0.667	2	1	Lamassu-Fam__LmuA_effector_Cap4_nuclease_II	mandatory	224	4.2e-09	33.5	0.174	0.263	27	85
Asgard	GCA_016840485_1_ASM1684048v1-JAEOSG010000069.1_17_2	GCA_016840485_1_ASM1684048v1	Baldrarchaeia	Lamassu-Fam__LmuB_SMC_Cap4_nuclease_II	1949	defense-finder-models/DefenseFinder_1/Lamassu-Fam/Lamassu-Fam	UserReplicon_Lamassu-Fam_1	1	1	0.667	2	1	Lamassu-Fam__LmuB_SMC_Cap4_nuclease_II	mandatory	1181	5.1e-14	49.9	0.39	0.218	887	1143
Asgard	GCA_016840485_1_ASM1684048v1-JAEOSG010000257.1_82_2	GCA_016840485_1_ASM1684048v1	Baldrarchaeia	Shedu__SduA	3377	defense-finder-models/DefenseFinder_1/Shedu/Shedu	UserReplicon_Shedu_2	1	1	1	1	1	Shedu__SduA	mandatory	408	1.6e-12	45.4	0.441	0.426	208	381
Bacteria	MBC74708.1	GCA_002711995.1	Bdellovibrionota	AbiEii__AbiEi_3	335	defense-finder-models/DefenseFinder_1/AbiE/AbiE	UserReplicon_AbiE_1	1	1	1	2	2	AbiEii__AbiEi_1	mandatory	287	7.7e-38	127.4	0.994	0.526	128	278
Bacteria	MBC74709.1	GCA_002711995.1	Bdellovibrionota	AbiEii__AbiEii	336	defense-finder-models/DefenseFinder_1/AbiE/AbiE	UserReplicon_AbiE_1	1	1	1	2	2	AbiEii__AbiEii	mandatory	159	2.4e-15	54.9	0.603	0.887	13	153
Bacteria	MBC74710.1	GCA_002711995.1	Bdellovibrionota	AbiEii__AbiEii	337	defense-finder-models/DefenseFinder_1/AbiE/AbiE	UserReplicon_AbiE_1	1	1	1	2	2	AbiEii__AbiEii	mandatory	175	2.2e-11	41.9	0.397	0.703	15	137
Bacteria	MBC76129.1	GCA_002711995.1	Bdellovibrionota	AbiO__AbiO	1756	defense-finder-models/DefenseFinder_1/AbiO/AbiO	UserReplicon_AbiO_2	1	1	1	1	1	AbiO__AbiO	mandatory	544	1.5e-17	60.9	0.328	0.329	193	371
Bacteria	MBC76177.1	GCA_002711995.1	Bdellovibrionota	CBASS__Cyclase_new	1804	defense-finder-models/DefenseFinder_5/CBASS/CBASS_I	UserReplicon_CBASS_I_2	1	1	1	2	1	CBASS__Cyclase_SMODS	mandatory	312	1.7e-12	44.6	0.707	0.801	47	296
Bacteria	MBC76178.1	GCA_002711995.1	Bdellovibrionota	CBASS__Effector_2TM_S_2TMBeta	1805	defense-finder-models/DefenseFinder_5/CBASS/CBASS_I	UserReplicon_CBASS_I_2	1	1	1	2	1	CBASS__Effector_2TM_S_2TMBeta	mandatory	206	3e-31	106.2	0.972	0.869	16	194
Bacteria	MBC99343.1	GCA_002712005.1	Bdellovibrionota	SspBCDE__SspD	3237	defense-finder-models/DefenseFinder_4/SspBCDE/SspBCDE	UserReplicon_SspBCDE_2	1	1	0.429	3	1	SspBCDE__SspD	mandatory	276	5.1e-98	325.7	0.982	0.949	13	274
Bacteria	MBC99344.1	GCA_002712005.1	Bdellovibrionota	SspBCDE__SspC	3238	defense-finder-models/DefenseFinder_4/SspBCDE/SspBCDE	UserReplicon_SspBCDE_2	1	1	0.429	3	1	SspBCDE__SspC	mandatory	1240	1.3e-95	319	0.853	0.795	235	1220
Bacteria	MBC99345.1	GCA_002712005.1	Bdellovibrionota	SspBCDE__SspB	3239	defense-finder-models/DefenseFinder_4/SspBCDE/SspBCDE	UserReplicon_SspBCDE_2	1	1	0.429	3	1	SspBCDE__SspB	mandatory	285	2.2e-29	100.3	0.966	0.986	1	281
Bacteria	MBC99348.1	GCA_002712005.1	Bdellovibrionota	PD-T7-3__PD-T7-3	3242	defense-finder-models/DefenseFinder_4/PD-T7-3/PD-T7-3	UserReplicon_PD-T7-3_1	1	1	1	1	1	PD-T7-3__PD-T7-3	mandatory	398	1e-33	114.9	0.872	0.962	5	387
Bacteria	MBI99837.1	GCA_002718735.1	Bdellovibrionota	AbiEii__AbiEii	254	defense-finder-models/DefenseFinder_1/AbiE/AbiE	UserReplicon_AbiE_1	1	1	1	2	1	AbiEii__AbiEii	mandatory	272	1.6e-32	110	0.958	0.816	32	253
Bacteria	MBI99838.1	GCA_002718735.1	Bdellovibrionota	AbiEii__AbiEi_4	255	defense-finder-models/DefenseFinder_1/AbiE/AbiE	UserReplicon_AbiE_1	1	1	1	2	1	AbiEii__AbiEi_1	mandatory	230	1.3e-09	34.6	0.735	0.157	20	55
Bacteria	MBJ00212.1	GCA_002718735.1	Bdellovibrionota	Lit__Lit	628	defense-finder-models/DefenseFinder_1/Lit/Lit	UserReplicon_Lit_2	1	1	1	1	1	Lit__Lit	mandatory	223	2e-05	20.4	0.215	0.3	101	167
Bacteria	MBT3525952.1	GCA_018646675.1	Bdellovibrionota	RM__Type_I_S	1299	defense-finder-models/RM/RM/RM_Type_I	UserReplicon_RM_Type_I_1	1	1	1	2.5	1	RM__Type_I_S	accessory	190	1.8e-24	83.5	0.251	0.958	1	182
Bacteria	MBT3525954.1	GCA_018646675.1	Bdellovibrionota	RM__Type_I_MTases	1301	defense-finder-models/RM/RM/RM_Type_I	UserReplicon_RM_Type_I_1	1	1	1	2.5	1	RM__Type_I_MTases	mandatory	503	1.9e-177	588.6	0.998	0.998	1	502
Bacteria	MBT3525955.1	GCA_018646675.1	Bdellovibrionota	RM__Type_I_S	1302	defense-finder-models/RM/RM/RM_Type_I	UserReplicon_RM_Type_I_1	1	1	1	2.5	1	RM__Type_I_S	accessory	428	3.1e-82	273.8	0.574	0.981	8	427
Bacteria	MBT3525957.1	GCA_018646675.1	Bdellovibrionota	RM__Type_I_REases	1304	defense-finder-models/RM/RM/RM_Type_I	UserReplicon_RM_Type_I_1	1	1	1	2.5	1	RM__Type_I_REases	mandatory	1065	6.2e-224	743.8	0.974	0.955	16	1032
Bacteria	OFZ02408.1	GCA_001769805.1	Bdellovibrionota	AbiEii__AbiEii	33	defense-finder-models/DefenseFinder_1/AbiE/AbiE	UserReplicon_AbiE_1	1	1	1	2	1	AbiEii__AbiEii	mandatory	175	9.9e-06	23.3	0.259	0.377	71	136
Bacteria	OFZ02409.1	GCA_001769805.1	Bdellovibrionota	AbiEii__AbiEi_4	34	defense-finder-models/DefenseFinder_1/AbiE/AbiE	UserReplicon_AbiE_1	1	1	1	2	1	AbiEii__AbiEi_1	mandatory	198	1.1e-08	32.7	0.694	0.172	19	52
Bacteria	OFZ02431.1	GCA_001769805.1	Bdellovibrionota	RM__Type_I_REases	56	defense-finder-models/RM/RM/RM_Type_I	UserReplicon_RM_Type_I_1	1	1	1	2.5	1	RM__Type_I_REases	mandatory	1025	4.8e-224	744.4	0.985	0.978	7	1008
Bacteria	OFZ02432.1	GCA_001769805.1	Bdellovibrionota	RM__Type_I_S	57	defense-finder-models/RM/RM/RM_Type_I	UserReplicon_RM_Type_I_1	1	1	1	2.5	1	RM__Type_I_S	accessory	389	3.7e-76	254	0.577	0.99	3	387
Bacteria	OFZ02433.1	GCA_001769805.1	Bdellovibrionota	RM__Type_I_MTases	58	defense-finder-models/RM/RM/RM_Type_I	UserReplicon_RM_Type_I_1	1	1	1	2.5	1	RM__Type_I_MTases	mandatory	804	1.1e-145	484	0.988	0.996	2	802
Bacteria	OFZ02721.1	GCA_001769805.1	Bdellovibrionota	CBASS__E2_II	288	defense-finder-models/DefenseFinder_5/CBASS/CBASS_II	UserReplicon_CBASS_II_3	1	1	1	3	1	CBASS__E2	mandatory	219	1.1e-70	235.1	0.986	0.977	3	216
Bacteria	OFZ02722.1	GCA_001769805.1	Bdellovibrionota	CBASS__Cyclase_II	289	defense-finder-models/DefenseFinder_5/CBASS/CBASS_II	UserReplicon_CBASS_II_3	1	1	1	3	1	CBASS__Cyclase_SMODS	mandatory	339	7.1e-73	243.2	0.956	0.923	1	313
Bacteria	OFZ02723.1	GCA_001769805.1	Bdellovibrionota	CBASS__Phospholipase	290	defense-finder-models/DefenseFinder_5/CBASS/CBASS_II	UserReplicon_CBASS_II_3	1	1	1	3	1	CBASS__Effector_2TM_S_2TMBeta	mandatory	364	2.6e-90	300.6	0.918	0.918	7	340
Bacteria	OFZ46215.1	GCA_001770015.1	Bdellovibrionota	CapRel__CapRel	300	defense-finder-models/DefenseFinder_3/CapRel/CapRel	UserReplicon_CapRel_1	1	1	1	1	1	CapRel__CapRel	mandatory	346	6.6e-39	131.9	0.952	0.974	4	340
Bacteria	OFZ48509.1	GCA_001770015.1	Bdellovibrionota	SoFic__SoFic	1371	defense-finder-models/DefenseFinder_5/SoFIC/SoFic	UserReplicon_SoFic_1	1	1	1	1	1	SoFic__SoFic	mandatory	374	1.7e-117	390.5	0.981	0.963	14	373
Bacteria	OFZ48945.1	GCA_001770015.1	Bdellovibrionota	DarTG__DarG	1593	defense-finder-models/DefenseFinder_2/DarTG/DarTG	UserReplicon_DarTG_1	1	1	1	2	1	DarTG__DarG	mandatory	176	8.7e-17	59.5	0.688	0.841	1	148
Bacteria	OFZ48946.1	GCA_001770015.1	Bdellovibrionota	DarTG__DarT	1594	defense-finder-models/DefenseFinder_2/DarTG/DarTG	UserReplicon_DarTG_1	1	1	1	2	1	DarTG__DarT	mandatory	213	6.8e-38	128.3	0.92	0.826	19	194
Bacteria	OFZ49558.1	GCA_001770015.1	Bdellovibrionota	RM_Type_IIG__Type_IIG	1932	defense-finder-models/RM/RM/RM_Type_IIG	UserReplicon_RM_Type_IIG_3	1	1	1	1	1	RM_Type_IIG__Type_IIG	mandatory	995	1.7e-138	461.4	0.987	0.982	7	983
Bacteria	OFZ49570.1	GCA_001770015.1	Bdellovibrionota	RM_Type_II__Type_II_MTases	1944	defense-finder-models/RM/RM/RM_Type_II	UserReplicon_RM_Type_II_1	1	1	1	2	1	RM_Type_II__Type_II_MTases	mandatory	481	1.8e-10	37.8	0.505	0.42	3	204
Bacteria	OFZ49571.1	GCA_001770015.1	Bdellovibrionota	RM_Type_II__Type_II_REases	1945	defense-finder-models/RM/RM/RM_Type_II	UserReplicon_RM_Type_II_1	1	1	1	2	1	RM_Type_II__Type_II_REases	mandatory	217	2.7e-27	94.7	0.744	0.949	10	215
Bacteria	OFZ50338.1	GCA_001770015.1	Bdellovibrionota	RM_Type_II__Type_II_MTases	2370	defense-finder-models/RM/RM/RM_Type_II	UserReplicon_RM_Type_II_2	1	1	1	2	2	RM_Type_II__Type_II_MTases	mandatory	296	4.4e-49	165	0.683	0.811	6	245
Bacteria	OFZ50339.1	GCA_001770015.1	Bdellovibrionota	RM_Type_II__Type_II_MTases	2371	defense-finder-models/RM/RM/RM_Type_II	UserReplicon_RM_Type_II_2	1	1	1	2	2	RM_Type_II__Type_II_MTases	mandatory	299	2.4e-47	159.3	0.702	0.829	8	255
Bacteria	OFZ50340.1	GCA_001770015.1	Bdellovibrionota	RM_Type_II__Type_II_REases	2372	defense-finder-models/RM/RM/RM_Type_II	UserReplicon_RM_Type_II_2	1	1	1	2	2	RM_Type_II__Type_II_REases	mandatory	258	5.6e-07	27.6	0.573	0.64	42	206
Bacteria	OFZ50403.1	GCA_001770015.1	Bdellovibrionota	Hachiman__HamB	2414	defense-finder-models/DefenseFinder_4/Hachiman/Hachiman	UserReplicon_Hachiman_1	1	1	1	2	1	Hachiman__HamB	mandatory	831	1.7e-67	226.3	0.5	0.588	71	559
Bacteria	OFZ50404.1	GCA_001770015.1	Bdellovibrionota	Hachiman__HamA_1	2415	defense-finder-models/DefenseFinder_4/Hachiman/Hachiman	UserReplicon_Hachiman_1	1	1	1	2	1	Hachiman__HamA_1	mandatory	324	3.3e-17	60.7	0.672	0.679	91	310
Bacteria	OFZ52153.1	GCA_001770015.1	Bdellovibrionota	AbiEii__AbiEii	3516	defense-finder-models/DefenseFinder_1/AbiE/AbiE	UserReplicon_AbiE_1	1	1	1	2	1	AbiEii__AbiEii	mandatory	280	9.8e-08	30.1	0.69	0.625	42	216
Bacteria	OFZ52154.1	GCA_001770015.1	Bdellovibrionota	AbiEii__AbiEi_2	3517	defense-finder-models/DefenseFinder_1/AbiE/AbiE	UserReplicon_AbiE_1	1	1	1	2	1	AbiEii__AbiEi_1	mandatory	344	2.4e-22	77.6	0.958	0.398	199	335
Bacteria	OFZ92203.1	GCA_001770205.1	Bdellovibrionota	AbiJ__AbiJ	576	defense-finder-models/DefenseFinder_1/AbiJ/AbiJ	UserReplicon_AbiJ_1	1	1	1	1	1	AbiJ__AbiJ	mandatory	261	7.7e-08	29.7	0.526	0.64	87	253
Bacteria	OFZ93575.1	GCA_001770205.1	Bdellovibrionota	SoFic__SoFic	1595	defense-finder-models/DefenseFinder_5/SoFIC/SoFic	UserReplicon_SoFic_1	1	1	1	1	1	SoFic__SoFic	mandatory	382	2e-112	373.7	0.986	0.948	14	375
Bacteria	PIP93411.1	GCA_002786715.1	Bdellovibrionota	Thoeris__ThsB_Global	1001	defense-finder-models/DefenseFinder_3/Thoeris/Thoeris_II	UserReplicon_Thoeris_II_1	1	1	1	2	1	Thoeris__ThsB_Global	mandatory	167	8.6e-24	82.3	0.767	0.928	3	157
Bacteria	PIP93412.1	GCA_002786715.1	Bdellovibrionota	Thoeris_II__ThsA_new_petit	1002	defense-finder-models/DefenseFinder_3/Thoeris/Thoeris_II	UserReplicon_Thoeris_II_1	1	1	1	2	1	Thoeris_II__ThsA_new_petit	mandatory	299	2.7e-19	67.7	0.935	0.739	58	278
Bacteria	PIP93520.1	GCA_002786715.1	Bdellovibrionota	Hachiman__HamA_1	1110	defense-finder-models/DefenseFinder_4/Hachiman/Hachiman	UserReplicon_Hachiman_1	1	1	1	2	1	Hachiman__HamA_1	mandatory	277	8.8e-06	23.3	0.39	0.614	29	198
Bacteria	PIP93521.1	GCA_002786715.1	Bdellovibrionota	Hachiman__HamB	1111	defense-finder-models/DefenseFinder_4/Hachiman/Hachiman	UserReplicon_Hachiman_1	1	1	1	2	1	Hachiman__HamB	mandatory	822	2.3e-42	143.1	0.379	0.415	134	474
Bacteria	PIP95047.1	GCA_002786715.1	Bdellovibrionota	RM__Type_I_MTases	2619	defense-finder-models/RM/RM/RM_Type_I	UserReplicon_RM_Type_I_1	1	1	1	2.5	1	RM__Type_I_MTases	mandatory	800	2.9e-155	515.9	0.99	0.996	2	798
Bacteria	PIP95049.1	GCA_002786715.1	Bdellovibrionota	RM__Type_I_S	2621	defense-finder-models/RM/RM/RM_Type_I	UserReplicon_RM_Type_I_1	1	1	1	2.5	1	RM__Type_I_S	accessory	393	6.4e-64	213.9	0.568	0.98	8	392
Bacteria	PIP95050.1	GCA_002786715.1	Bdellovibrionota	RM__Type_I_REases	2622	defense-finder-models/RM/RM/RM_Type_I	UserReplicon_RM_Type_I_1	1	1	1	2.5	1	RM__Type_I_REases	mandatory	1019	2.8e-240	798.4	0.979	0.972	7	996
Bacteria	PIP95185.1	GCA_002786715.1	Bdellovibrionota	Lamassu-Fam__LmuA_effector_Cap4_nuclease	2757	defense-finder-models/DefenseFinder_1/Lamassu-Fam/Lamassu-Fam	UserReplicon_Lamassu-Fam_1	1	1	0.667	2	1	Lamassu-Fam__LmuA_effector_Cap4_nuclease_II	mandatory	361	1.8e-41	140.6	0.978	0.972	9	359
Bacteria	PIP95186.1	GCA_002786715.1	Bdellovibrionota	Lamassu-Fam__LmuB_SMC_Cap4_nuclease	2758	defense-finder-models/DefenseFinder_1/Lamassu-Fam/Lamassu-Fam	UserReplicon_Lamassu-Fam_1	1	1	0.667	2	1	Lamassu-Fam__LmuB_SMC_Cap4_nuclease_II	mandatory	474	3.5e-102	340.5	0.839	0.994	1	471
Bacteria	PIP96612.1	GCA_002786715.1	Bdellovibrionota	PD-T7-1__PD-T7-1	3850	defense-finder-models/DefenseFinder_4/PD-T7-1/PD-T7-1	UserReplicon_PD-T7-1_2	1	1	1	1	1	PD-T7-1__PD-T7-1	mandatory	448	2.6e-155	515.3	0.985	0.991	4	447
Bacteria	PIQ52399.1	GCA_002787775.1	Bdellovibrionota	RM__Type_I_REases	111	defense-finder-models/RM/RM/RM_Type_I	UserReplicon_RM_Type_I_1	1	1	1	2.5	1	RM__Type_I_REases	mandatory	1090	0	1352.6	0.982	0.986	9	1083
Bacteria	PIQ52400.1	GCA_002787775.1	Bdellovibrionota	RM__Type_I_S	112	defense-finder-models/RM/RM/RM_Type_I	UserReplicon_RM_Type_I_1	1	1	1	2.5	1	RM__Type_I_S	accessory	435	3.1e-60	202.1	0.575	0.956	4	419
Bacteria	PIQ52401.1	GCA_002787775.1	Bdellovibrionota	RM__Type_I_MTases	113	defense-finder-models/RM/RM/RM_Type_I	UserReplicon_RM_Type_I_1	1	1	1	2.5	1	RM__Type_I_MTases	mandatory	764	1.1e-281	933.4	1.285	0.997	2	763
Bacteria	PIQ52455.1	GCA_002787775.1	Bdellovibrionota	RM_Type_IV__Type_IV_REases	167	defense-finder-models/RM/RM/RM_Type_IV	UserReplicon_RM_Type_IV_3	1	1	1	1	1	RM_Type_IV__Type_IV_REases	mandatory	688	7.2e-47	158.2	1.145	0.82	41	604
Bacteria	PIQ56006.1	GCA_002787775.1	Bdellovibrionota	RM_Type_IIG__Type_IIG	2095	defense-finder-models/RM/RM/RM_Type_IIG	UserReplicon_RM_Type_IIG_2	1	1	1	1	1	RM_Type_IIG__Type_IIG	mandatory	1603	4.4e-299	993	1.24	0.989	7	1592
Bacteria	HBR09927.1	GCA_003535305.1	Bipolaricaulota	Cas__cas8e_I-E_3	293	defense-finder-models/Cas/Cas/CAS_Class1-Subtype-I-E	UserReplicon_CAS_Class1-Subtype-I-E_1	1	1	0.875	7	1	Cas__cas8e_I-E_1	mandatory	522	2.9e-170	563	0.994	0.983	6	518
Bacteria	HBR09928.1	GCA_003535305.1	Bipolaricaulota	Cas__cse2gr11_I-E_7	294	defense-finder-models/Cas/Cas/CAS_Class1-Subtype-I-E	UserReplicon_CAS_Class1-Subtype-I-E_1	1	1	0.875	7	1	Cas__cse2gr11_I-E_2	mandatory	182	5.7e-37	122.8	0.995	0.978	1	178
Bacteria	HBR09929.1	GCA_003535305.1	Bipolaricaulota	Cas__cas7_I-E_16	295	defense-finder-models/Cas/Cas/CAS_Class1-Subtype-I-E	UserReplicon_CAS_Class1-Subtype-I-E_1	1	1	0.875	7	1	Cas__cas7_I-E_16	mandatory	422	4.4e-100	331.4	0.936	0.917	7	393
Bacteria	HBR09930.1	GCA_003535305.1	Bipolaricaulota	Cas__cas5_I-E_3	296	defense-finder-models/Cas/Cas/CAS_Class1-Subtype-I-E	UserReplicon_CAS_Class1-Subtype-I-E_1	1	1	0.875	7	1	Cas__cas5_I-E_3	mandatory	240	9.5e-44	145.2	0.962	0.762	4	186
Bacteria	HBR09931.1	GCA_003535305.1	Bipolaricaulota	Cas__cas6e_I_II_III_IV_V_VI_2	297	defense-finder-models/Cas/Cas/CAS_Class1-Subtype-I-E	UserReplicon_CAS_Class1-Subtype-I-E_1	1	1	0.875	7	1	Cas__cas6e_I_II_III_IV_V_VI_1	mandatory	254	5.1e-32	107.5	1	0.949	11	251
Bacteria	HBR09932.1	GCA_003535305.1	Bipolaricaulota	Cas__cas1_I-E_1	298	defense-finder-models/Cas/Cas/CAS_Class1-Subtype-I-E	UserReplicon_CAS_Class1-Subtype-I-E_1	1	1	0.875	7	1	Cas__cas1_I-E_1	mandatory	294	1.4e-81	269.4	1	0.922	15	285
Bacteria	HBR09933.1	GCA_003535305.1	Bipolaricaulota	Cas__cas2_I-E_1	299	defense-finder-models/Cas/Cas/CAS_Class1-Subtype-I-E	UserReplicon_CAS_Class1-Subtype-I-E_1	1	1	0.875	7	1	Cas__cas2_I-E_1	accessory	118	3.2e-24	80.7	0.988	0.771	4	94
Bacteria	KUK26620.1	GCA_001508155.1	Bipolaricaulota	AbiEii__AbiEi_4	618	defense-finder-models/DefenseFinder_1/AbiE/AbiE	UserReplicon_AbiE_1	1	1	1	2	1	AbiEii__AbiEi_1	mandatory	203	3.3e-11	39.9	0.959	0.227	12	57
Bacteria	KUK26621.1	GCA_001508155.1	Bipolaricaulota	AbiEii__AbiEii	619	defense-finder-models/DefenseFinder_1/AbiE/AbiE	UserReplicon_AbiE_1	1	1	1	2	1	AbiEii__AbiEii	mandatory	318	3.4e-41	138.5	0.933	0.698	39	260
Bacteria	KUK27780.1	GCA_001508155.1	Bipolaricaulota	Cas__cas6_I_II_III_IV_V_VI_20	1778	defense-finder-models/Cas/Cas/CAS_Class1-Subtype-I-B	UserReplicon_CAS_Class1-Subtype-I-B_1	1	1	1	8	1	Cas__cas6_I-B_III_1	accessory	262	9.1e-37	123.4	0.987	0.569	99	247
Bacteria	KUK27781.1	GCA_001508155.1	Bipolaricaulota	Cas__cas8b1_I-B_14	1779	defense-finder-models/Cas/Cas/CAS_Class1-Subtype-I-B	UserReplicon_CAS_Class1-Subtype-I-B_1	1	1	1	8	1	Cas__cas8b2_I-B_2	mandatory	721	4.8e-91	302.9	0.998	0.972	1	701
Bacteria	KUK27782.1	GCA_001508155.1	Bipolaricaulota	Cas__cas7b_I-B_I-C_2	1780	defense-finder-models/Cas/Cas/CAS_Class1-Subtype-I-B	UserReplicon_CAS_Class1-Subtype-I-B_1	1	1	1	8	1	Cas__cas7_I_15	accessory	352	4.8e-56	186.8	0.854	0.727	17	272
Bacteria	KUK27783.1	GCA_001508155.1	Bipolaricaulota	Cas__cas5_I-B_22	1781	defense-finder-models/Cas/Cas/CAS_Class1-Subtype-I-B	UserReplicon_CAS_Class1-Subtype-I-B_1	1	1	1	8	1	Cas__cas5_I-B_6	mandatory	259	9.6e-29	97.2	0.976	0.822	36	248
Bacteria	KUK27784.1	GCA_001508155.1	Bipolaricaulota	Cas__cas3_I_5	1782	defense-finder-models/Cas/Cas/CAS_Class1-Subtype-I-B	UserReplicon_CAS_Class1-Subtype-I-B_1	1	1	1	8	1	Cas__cas3_I_5	accessory	826	2.1e-45	152	0.451	0.424	292	641
Bacteria	KUK27785.1	GCA_001508155.1	Bipolaricaulota	Cas__cas4_I_II_III_IV_V_VI_6	1783	defense-finder-models/Cas/Cas/CAS_Class1-Subtype-I-B	UserReplicon_CAS_Class1-Subtype-I-B_1	1	1	1	8	1	Cas__cas4_I_II_III_IV_V_VI_6	accessory	164	9.1e-45	149.4	0.95	0.933	1	153
Bacteria	KUK27786.1	GCA_001508155.1	Bipolaricaulota	Cas__cas1_I_II_III_IV_V_VI_7	1784	defense-finder-models/Cas/Cas/CAS_Class1-Subtype-I-B	UserReplicon_CAS_Class1-Subtype-I-B_1	1	1	1	8	1	Cas__cas1_I_II_III_IV_V_VI_7	accessory	330	5.9e-138	456.1	0.997	0.979	5	327
Bacteria	KUK27787.1	GCA_001508155.1	Bipolaricaulota	Cas__cas2_I_II_III_IV_V_VI_5	1785	defense-finder-models/Cas/Cas/CAS_Class1-Subtype-I-B	UserReplicon_CAS_Class1-Subtype-I-B_1	1	1	1	8	1	Cas__cas2_I_II_III_IV_V_VI_3	accessory	87	1.7e-27	92.3	0.944	0.943	1	82
Bacteria	MBI1742540.1	GCA_016179105.1	Bipolaricaulota	SoFic__SoFic	1105	defense-finder-models/DefenseFinder_5/SoFIC/SoFic	UserReplicon_SoFic_1	1	1	1	1	1	SoFic__SoFic	mandatory	385	8e-122	404.6	0.983	0.935	23	382
Bacteria	MBI1742586.1	GCA_016179105.1	Bipolaricaulota	RM_Type_IIG__Type_IIG	1151	defense-finder-models/RM/RM/RM_Type_IIG	UserReplicon_RM_Type_IIG_2	1	1	1	1	1	RM_Type_IIG__Type_IIG	mandatory	642	1.8e-91	305.7	0.681	0.969	15	636
Bacteria	MBI1744451.1	GCA_016179105.1	Bipolaricaulota	RM_Type_II__Type_II_REases	3016	defense-finder-models/RM/RM/RM_Type_II	UserReplicon_RM_Type_II_1	1	1	1	2	1	RM_Type_II__Type_II_REases	mandatory	199	2.1e-10	39.1	0.687	0.729	16	160
Bacteria	MBI1744452.1	GCA_016179105.1	Bipolaricaulota	RM_Type_II__Type_II_MTases	3017	defense-finder-models/RM/RM/RM_Type_II	UserReplicon_RM_Type_II_1	1	1	1	2	1	RM_Type_II__Type_II_MTases	mandatory	236	9e-10	36.1	0.303	0.623	88	234
Bacteria	MBS3787573.1	GCA_018334915.1	Bipolaricaulota	AbiEii__AbiEi_1	1016	defense-finder-models/DefenseFinder_1/AbiE/AbiE	UserReplicon_AbiE_1	1	1	1	2	2	AbiEii__AbiEi_1	mandatory	278	1.3e-14	52	0.951	0.486	87	221
Bacteria	MBS3787574.1	GCA_018334915.1	Bipolaricaulota	AbiEii__AbiEii	1017	defense-finder-models/DefenseFinder_1/AbiE/AbiE	UserReplicon_AbiE_1	1	1	1	2	2	AbiEii__AbiEii	mandatory	158	3.6e-18	63.7	0.577	0.816	29	157
Bacteria	MBS3787575.1	GCA_018334915.1	Bipolaricaulota	AbiEii__AbiEii	1018	defense-finder-models/DefenseFinder_1/AbiE/AbiE	UserReplicon_AbiE_1	1	1	1	2	2	AbiEii__AbiEii	mandatory	100	6.6e-15	53	0.406	0.87	1	87
Bacteria	MBS3788113.1	GCA_018334915.1	Bipolaricaulota	RM__Type_I_MTases	1556	defense-finder-models/RM/RM/RM_Type_I	UserReplicon_RM_Type_I_1	1	1	1	2.5	1	RM__Type_I_MTases	mandatory	670	4.8e-262	868.3	1.285	0.997	2	669
Bacteria	MBS3788114.1	GCA_018334915.1	Bipolaricaulota	RM__Type_I_S	1557	defense-finder-models/RM/RM/RM_Type_I	UserReplicon_RM_Type_I_1	1	1	1	2.5	1	RM__Type_I_S	accessory	460	1.3e-75	252.7	0.513	0.946	23	457
Bacteria	MBS3788115.1	GCA_018334915.1	Bipolaricaulota	RM__Type_I_REases	1558	defense-finder-models/RM/RM/RM_Type_I	UserReplicon_RM_Type_I_1	1	1	1	2.5	1	RM__Type_I_REases	mandatory	1019	2.7e-298	989.5	0.965	0.93	42	989
Bacteria	MBS3789210.1	GCA_018334915.1	Bipolaricaulota	AbiEii__AbiEi_2	2653	defense-finder-models/DefenseFinder_1/AbiE/AbiE	UserReplicon_AbiE_2	1	1	1	2	1	AbiEii__AbiEi_1	mandatory	360	1.2e-05	22.9	0.937	0.394	204	345
Bacteria	MBS3789211.1	GCA_018334915.1	Bipolaricaulota	AbiEii__AbiEii	2654	defense-finder-models/DefenseFinder_1/AbiE/AbiE	UserReplicon_AbiE_2	1	1	1	2	1	AbiEii__AbiEii	mandatory	297	1.7e-06	25.5	0.339	0.263	158	235
Bacteria	MBS3813860.1	GCA_018334615.1	Bipolaricaulota	AbiEii__AbiEii	110	defense-finder-models/DefenseFinder_1/AbiE/AbiE	UserReplicon_AbiE_1	1	1	1	2	2	AbiEii__AbiEii	mandatory	309	2.5e-28	95.8	0.912	0.706	41	258
Bacteria	MBS3813861.1	GCA_018334615.1	Bipolaricaulota	AbiEii__AbiEi_4	111	defense-finder-models/DefenseFinder_1/AbiE/AbiE	UserReplicon_AbiE_1	1	1	1	2	2	AbiEii__AbiEi_1	mandatory	262	4.9e-09	32.4	0.816	0.168	25	68
Bacteria	MBS3813863.1	GCA_018334615.1	Bipolaricaulota	AbiEii__AbiEi_1	113	defense-finder-models/DefenseFinder_1/AbiE/AbiE	UserReplicon_AbiE_1	1	1	1	2	2	AbiEii__AbiEi_1	mandatory	277	1.5e-12	44.1	0.923	0.477	90	221
Bacteria	WP_122030639.1	GCF_900465355.1	Bipolaricaulota	RM__Type_I_S	247	defense-finder-models/RM/RM/RM_Type_I	UserReplicon_RM_Type_I_1	1	1	1	2.5	1	RM__Type_I_S	accessory	371	1.4e-58	195.3	0.547	0.984	7	371
Bacteria	WP_122030640.1	GCF_900465355.1	Bipolaricaulota	RM__Type_I_MTases	248	defense-finder-models/RM/RM/RM_Type_I	UserReplicon_RM_Type_I_1	1	1	1	2.5	1	RM__Type_I_MTases	mandatory	502	3.4e-147	487	0.953	0.96	10	491
Bacteria	WP_122030641.1	GCF_900465355.1	Bipolaricaulota	RM__Type_I_REases	249	defense-finder-models/RM/RM/RM_Type_I	UserReplicon_RM_Type_I_1	1	1	1	2.5	1	RM__Type_I_REases	mandatory	887	1.7e-127	423.2	0.555	0.663	4	591
Bacteria	WP_122031344.1	GCF_900465355.1	Bipolaricaulota	RM_Type_III__Type_III_MTases	608	defense-finder-models/RM/RM/RM_Type_III	UserReplicon_RM_Type_III_3	1	1	1	2	1	RM_Type_III__Type_III_MTases	mandatory	1270	3e-64	214.2	0.568	0.317	52	453
Bacteria	WP_122031348.1	GCF_900465355.1	Bipolaricaulota	RM_Type_III__Type_III_REases	610	defense-finder-models/RM/RM/RM_Type_III	UserReplicon_RM_Type_III_3	1	1	1	2	1	RM_Type_III__Type_III_REases	mandatory	932	2.7e-12	41.8	0.386	0.49	142	598
Bacteria	WP_231944258.1	GCF_900465355.1	Bipolaricaulota	RM_Type_IIG__Type_IIG	1178	defense-finder-models/RM/RM/RM_Type_IIG	UserReplicon_RM_Type_IIG_2	1	1	1	1	1	RM_Type_IIG__Type_IIG	mandatory	1005	1.3e-209	695.3	1.176	0.981	4	989
Bacteria	MBP6926907.1	GCA_017992555.1	Caldisericota	RM_Type_IV__Type_IV_REases	235	defense-finder-models/RM/RM/RM_Type_IV	UserReplicon_RM_Type_IV_4	1	1	1	1	1	RM_Type_IV__Type_IV_REases	mandatory	310	3.2e-60	200.5	0.385	0.545	137	305
Bacteria	MBP6927080.1	GCA_017992555.1	Caldisericota	RloC__RloC	408	defense-finder-models/DefenseFinder_1/RloC/RloC	UserReplicon_RloC_1	1	1	1	1	1	RloC__RloC	mandatory	756	5.1e-119	395.2	0.992	0.974	4	739
Bacteria	MBP6927199.1	GCA_017992555.1	Caldisericota	RM_Type_II__Type_II_MTases	527	defense-finder-models/RM/RM/RM_Type_II	UserReplicon_RM_Type_II_1	1	1	1	2	1	RM_Type_II__Type_II_MTases	mandatory	280	5.5e-96	317.3	0.735	0.979	6	279
Bacteria	MBP6927200.1	GCA_017992555.1	Caldisericota	RM_Type_II__Type_II_REases	528	defense-finder-models/RM/RM/RM_Type_II	UserReplicon_RM_Type_II_1	1	1	1	2	1	RM_Type_II__Type_II_REases	mandatory	430	2.9e-71	237.2	1.088	0.974	11	429
Bacteria	MBP6927395.1	GCA_017992555.1	Caldisericota	RM_Type_IIG__Type_IIG	723	defense-finder-models/RM/RM/RM_Type_IIG	UserReplicon_RM_Type_IIG_2	1	1	1	1	1	RM_Type_IIG__Type_IIG	mandatory	1202	1.7e-147	489.7	0.725	0.522	14	640
Bacteria	MBP6927737.1	GCA_017992555.1	Caldisericota	Cas__cas2_I-E_1	1065	defense-finder-models/Cas/Cas/CAS_Class1-Subtype-I-E	UserReplicon_CAS_Class1-Subtype-I-E_1	1	1	1	8	1	Cas__cas2_I-E_1	accessory	110	3.3e-33	109.9	1	0.782	1	86
Bacteria	MBP6927739.1	GCA_017992555.1	Caldisericota	Cas__cas1_I-E_1	1067	defense-finder-models/Cas/Cas/CAS_Class1-Subtype-I-E	UserReplicon_CAS_Class1-Subtype-I-E_1	1	1	1	8	1	Cas__cas1_I-E_1	mandatory	309	1.8e-104	344.9	0.996	0.841	11	270
Bacteria	MBP6927740.1	GCA_017992555.1	Caldisericota	Cas__cas6e_I_II_III_IV_V_VI_2	1068	defense-finder-models/Cas/Cas/CAS_Class1-Subtype-I-E	UserReplicon_CAS_Class1-Subtype-I-E_1	1	1	1	8	1	Cas__cas6e_I_II_III_IV_V_VI_1	mandatory	218	8.8e-39	130	1	0.972	4	215
Bacteria	MBP6927741.1	GCA_017992555.1	Caldisericota	Cas__cas5_I-E_3	1069	defense-finder-models/Cas/Cas/CAS_Class1-Subtype-I-E	UserReplicon_CAS_Class1-Subtype-I-E_1	1	1	1	8	1	Cas__cas5_I-E_3	mandatory	260	7.2e-43	142.7	0.934	0.627	9	171
Bacteria	MBP6927742.1	GCA_017992555.1	Caldisericota	Cas__cas7_I-E_16	1070	defense-finder-models/Cas/Cas/CAS_Class1-Subtype-I-E	UserReplicon_CAS_Class1-Subtype-I-E_1	1	1	1	8	1	Cas__cas7_I-E_16	mandatory	380	7e-112	370.6	0.944	0.932	3	356
Bacteria	MBP6927743.1	GCA_017992555.1	Caldisericota	Cas__cse2gr11_I-E_8	1071	defense-finder-models/Cas/Cas/CAS_Class1-Subtype-I-E	UserReplicon_CAS_Class1-Subtype-I-E_1	1	1	1	8	1	Cas__cse2gr11_I-E_2	mandatory	191	5.5e-31	104.1	0.986	0.728	30	168
Bacteria	MBP6927744.1	GCA_017992555.1	Caldisericota	Cas__cas8e_I-E_5	1072	defense-finder-models/Cas/Cas/CAS_Class1-Subtype-I-E	UserReplicon_CAS_Class1-Subtype-I-E_1	1	1	1	8	1	Cas__cas8e_I-E_1	mandatory	585	5.7e-67	222.9	0.989	0.894	18	540
Bacteria	MBP6927745.1	GCA_017992555.1	Caldisericota	Cas__cas3_I_5	1073	defense-finder-models/Cas/Cas/CAS_Class1-Subtype-I-E	UserReplicon_CAS_Class1-Subtype-I-E_1	1	1	1	8	1	Cas__cas3_I_5	accessory	950	1.7e-75	250.9	0.64	0.553	229	753
Bacteria	MBP6927893.1	GCA_017992555.1	Caldisericota	RM_Type_IIG__Type_IIG	1221	defense-finder-models/RM/RM/RM_Type_IIG	UserReplicon_RM_Type_IIG_3	1	1	1	1	1	RM_Type_IIG__Type_IIG	mandatory	841	7.8e-108	358.4	0.683	0.973	18	835
Bacteria	MBP6928255.1	GCA_017992475.1	Caldisericota	RM_Type_IV__Type_IV_REases	304	defense-finder-models/RM/RM/RM_Type_IV	UserReplicon_RM_Type_IV_1	1	1	1	1	1	RM_Type_IV__Type_IV_REases	mandatory	310	1.4e-60	201.7	0.385	0.545	137	305
Bacteria	MBP6929074.1	GCA_017992475.1	Caldisericota	Cas__cas2_I-E_1	1123	defense-finder-models/Cas/Cas/CAS_Class1-Subtype-I-E	UserReplicon_CAS_Class1-Subtype-I-E_1	1	1	1	8	1	Cas__cas2_I-E_1	accessory	117	8.8e-33	108.6	1	0.735	1	86
Bacteria	MBP6929076.1	GCA_017992475.1	Caldisericota	Cas__cas1_I-E_1	1125	defense-finder-models/Cas/Cas/CAS_Class1-Subtype-I-E	UserReplicon_CAS_Class1-Subtype-I-E_1	1	1	1	8	1	Cas__cas1_I-E_1	mandatory	309	1.8e-103	341.6	0.996	0.841	11	270
Bacteria	MBP6929077.1	GCA_017992475.1	Caldisericota	Cas__cas6e_I_II_III_IV_V_VI_2	1126	defense-finder-models/Cas/Cas/CAS_Class1-Subtype-I-E	UserReplicon_CAS_Class1-Subtype-I-E_1	1	1	1	8	1	Cas__cas6e_I_II_III_IV_V_VI_1	mandatory	218	2.7e-39	131.7	1	0.972	4	215
Bacteria	MBP6929078.1	GCA_017992475.1	Caldisericota	Cas__cas5_I-E_3	1127	defense-finder-models/Cas/Cas/CAS_Class1-Subtype-I-E	UserReplicon_CAS_Class1-Subtype-I-E_1	1	1	1	8	1	Cas__cas5_I-E_3	mandatory	261	3.5e-44	147.1	0.94	0.628	9	172
Bacteria	MBP6929079.1	GCA_017992475.1	Caldisericota	Cas__cas7_I-E_16	1128	defense-finder-models/Cas/Cas/CAS_Class1-Subtype-I-E	UserReplicon_CAS_Class1-Subtype-I-E_1	1	1	1	8	1	Cas__cas7_I-E_16	mandatory	379	2.9e-111	368.7	0.942	0.931	3	355
Bacteria	MBP6929080.1	GCA_017992475.1	Caldisericota	Cas__cse2gr11_I-E_8	1129	defense-finder-models/Cas/Cas/CAS_Class1-Subtype-I-E	UserReplicon_CAS_Class1-Subtype-I-E_1	1	1	1	8	1	Cas__cse2gr11_I-E_2	mandatory	191	6.4e-31	104	0.986	0.728	30	168
Bacteria	MBP6929081.1	GCA_017992475.1	Caldisericota	Cas__cas8e_I-E_5	1130	defense-finder-models/Cas/Cas/CAS_Class1-Subtype-I-E	UserReplicon_CAS_Class1-Subtype-I-E_1	1	1	1	8	1	Cas__cas8e_I-E_1	mandatory	580	7.9e-63	209.3	0.987	0.891	18	534
Bacteria	MBP6929082.1	GCA_017992475.1	Caldisericota	Cas__cas3_I_2	1131	defense-finder-models/Cas/Cas/CAS_Class1-Subtype-I-E	UserReplicon_CAS_Class1-Subtype-I-E_1	1	1	1	8	1	Cas__cas3_I_5	accessory	954	9.4e-75	248.2	0.994	0.423	331	734
Bacteria	MBP7732815.1	GCA_017999835.1	Caldisericota	RM_Type_IIG__Type_IIG	679	defense-finder-models/RM/RM/RM_Type_IIG	UserReplicon_RM_Type_IIG_1	1	1	1	1	1	RM_Type_IIG__Type_IIG	mandatory	726	1.4e-126	420.8	0.828	0.964	21	720
Bacteria	MBP7733144.1	GCA_017999835.1	Caldisericota	RM_Type_IV__Type_IV_REases	1008	defense-finder-models/RM/RM/RM_Type_IV	UserReplicon_RM_Type_IV_2	1	1	1	1	1	RM_Type_IV__Type_IV_REases	mandatory	310	2e-58	194.9	0.382	0.542	138	305
Bacteria	MBP7733703.1	GCA_017999835.1	Caldisericota	PD-T7-4__PD-T7-4	1567	defense-finder-models/DefenseFinder_4/PD-T7-4/PD-T7-4	UserReplicon_PD-T7-4_1	1	1	1	1	1	PD-T7-4__PD-T7-4	mandatory	150	9.3e-51	168.8	0.69	0.98	1	147
Bacteria	MBP7733760.1	GCA_017999835.1	Caldisericota	Cas__cas5_I-C_11	1624	defense-finder-models/Cas/Cas/CAS_Class1-Subtype-I-C	UserReplicon_CAS_Class1-Subtype-I-C_1	1	1	0.286	2	1	Cas__cas5_I-C_11	mandatory	238	3.5e-59	196.6	1	0.916	6	223
Bacteria	MBP7733761.1	GCA_017999835.1	Caldisericota	Cas__cas3_I_5	1625	defense-finder-models/Cas/Cas/CAS_Class1-Subtype-I-C	UserReplicon_CAS_Class1-Subtype-I-C_1	1	1	0.286	2	1	Cas__cas3_I_5	accessory	542	3.7e-55	184.1	0.466	0.659	16	372
Bacteria	MBP8707318.1	GCA_018054005.1	Caldisericota	Cas__cmr3gr5_III-C_1	228	defense-finder-models/Cas/Cas/CAS_Class1-Subtype-III-C	UserReplicon_CAS_Class1-Subtype-III-C_3	1	1	1	6	1	Cas__cmr3gr5_III-C_1	mandatory	311	1.8e-75	250.3	0.986	0.977	1	304
Bacteria	MBP8707319.1	GCA_018054005.1	Caldisericota	Cas__cmr5gr11_III-C_11	229	defense-finder-models/Cas/Cas/CAS_Class1-Subtype-III-C	UserReplicon_CAS_Class1-Subtype-III-C_3	1	1	1	6	1	Cas__cmr5gr11_III-C_11	accessory	119	2e-32	108.6	0.89	0.95	2	114
Bacteria	MBP8707320.1	GCA_018054005.1	Caldisericota	Cas__cmr4gr7_III-B_III-C_2	230	defense-finder-models/Cas/Cas/CAS_Class1-Subtype-III-C	UserReplicon_CAS_Class1-Subtype-III-C_3	1	1	1	6	1	Cas__cmr4gr7_III-B_III-C_2	accessory	306	5.5e-54	180	0.977	0.915	9	288
Bacteria	MBP8707321.1	GCA_018054005.1	Caldisericota	AbiEii__AbiEii	231	defense-finder-models/DefenseFinder_1/AbiE/AbiE	UserReplicon_AbiE_1	1	1	1	2	1	AbiEii__AbiEii	mandatory	1217	1.7e-30	103.1	0.946	0.173	36	246
Bacteria	MBP8707321.1	GCA_018054005.1	Caldisericota	Cas__cas10_III-C_3	231	defense-finder-models/Cas/Cas/CAS_Class1-Subtype-III-C	UserReplicon_CAS_Class1-Subtype-III-C_3	1	1	1	6	1	Cas__cas10_III-C_3	mandatory	1217	1.9e-268	889.7	0.997	0.782	259	1210
Bacteria	MBP8707322.1	GCA_018054005.1	Caldisericota	AbiEii__AbiEi_4	232	defense-finder-models/DefenseFinder_1/AbiE/AbiE	UserReplicon_AbiE_1	1	1	1	2	1	AbiEii__AbiEi_1	mandatory	252	7.7e-10	35.2	0.959	0.206	5	56
Bacteria	MBP8707323.1	GCA_018054005.1	Caldisericota	Cas__cmr6gr7_III-C_1	233	defense-finder-models/Cas/Cas/CAS_Class1-Subtype-III-C	UserReplicon_CAS_Class1-Subtype-III-C_3	1	1	1	6	1	Cas__cmr6gr7_III-C_1	mandatory	282	3.8e-32	108.2	0.435	0.387	144	252
Bacteria	MBP8707324.1	GCA_018054005.1	Caldisericota	Cas__cmr1gr7_III-B_III-C_3	234	defense-finder-models/Cas/Cas/CAS_Class1-Subtype-III-C	UserReplicon_CAS_Class1-Subtype-III-C_3	1	1	1	6	1	Cas__cmr1gr7_III-B_III-C_3	accessory	347	7e-21	71.4	0.486	0.314	25	133
Bacteria	MBP8707736.1	GCA_018054005.1	Caldisericota	Cas__cas2_I_II_III_IV_V_VI_5	646	defense-finder-models/Cas/Cas/CAS_Class1-Subtype-I-B	UserReplicon_CAS_Class1-Subtype-I-B_1	1	1	1	8	1	Cas__cas2_I_II_III_IV_V_VI_3	accessory	87	9.7e-29	96	0.955	0.954	1	83
Bacteria	MBP8707738.1	GCA_018054005.1	Caldisericota	Cas__cas1_I_II_III_IV_V_VI_7	648	defense-finder-models/Cas/Cas/CAS_Class1-Subtype-I-B	UserReplicon_CAS_Class1-Subtype-I-B_1	1	1	1	8	1	Cas__cas1_I_II_III_IV_V_VI_7	accessory	331	3.8e-139	459.7	0.997	0.979	4	327
Bacteria	MBP8707739.1	GCA_018054005.1	Caldisericota	Cas__cas4_I_II_III_IV_V_VI_6	649	defense-finder-models/Cas/Cas/CAS_Class1-Subtype-I-B	UserReplicon_CAS_Class1-Subtype-I-B_1	1	1	1	8	1	Cas__cas4_I_II_III_IV_V_VI_6	accessory	163	3.3e-53	176.5	0.994	0.975	5	163
Bacteria	MBP8707740.1	GCA_018054005.1	Caldisericota	Cas__cas3_I_5	650	defense-finder-models/Cas/Cas/CAS_Class1-Subtype-I-B	UserReplicon_CAS_Class1-Subtype-I-B_1	1	1	1	8	1	Cas__cas3_I_5	accessory	781	2.5e-58	194.3	0.595	0.552	246	676
Bacteria	MBP8707741.1	GCA_018054005.1	Caldisericota	Cas__cas5_I-B_17	651	defense-finder-models/Cas/Cas/CAS_Class1-Subtype-I-B	UserReplicon_CAS_Class1-Subtype-I-B_1	1	1	1	8	1	Cas__cas5_I-B_6	mandatory	238	7.4e-41	136.7	0.913	0.95	1	226
Bacteria	MBP8707742.1	GCA_018054005.1	Caldisericota	Cas__cas7_I-B_8	652	defense-finder-models/Cas/Cas/CAS_Class1-Subtype-I-B	UserReplicon_CAS_Class1-Subtype-I-B_1	1	1	1	8	1	Cas__cas7_I-B_6	mandatory	303	6.6e-89	294.3	0.993	0.904	7	280
Bacteria	MBP8707743.1	GCA_018054005.1	Caldisericota	Cas__cas8b1_I-B_14	653	defense-finder-models/Cas/Cas/CAS_Class1-Subtype-I-B	UserReplicon_CAS_Class1-Subtype-I-B_1	1	1	1	8	1	Cas__cas8b2_I-B_2	mandatory	590	3.9e-141	467.9	0.998	0.966	1	570
Bacteria	MBP8707744.1	GCA_018054005.1	Caldisericota	Cas__WYL_I_II_III_IV_V_VI_4	654	defense-finder-models/Cas/Cas/CAS_Class1-Subtype-I-B	UserReplicon_CAS_Class1-Subtype-I-B_1	1	1	1	8	1	Cas__WYL_I_II_III_IV_V_VI_1	neutral	233	1.8e-47	158	0.988	0.734	56	226
Bacteria	MBP8707745.1	GCA_018054005.1	Caldisericota	Cas__cas6_I_II_III_IV_V_VI_14	655	defense-finder-models/Cas/Cas/CAS_Class1-Subtype-I-B	UserReplicon_CAS_Class1-Subtype-I-B_1	1	1	1	8	1	Cas__cas6_I-B_III_1	accessory	253	2.4e-41	138.6	0.988	0.984	1	249
Bacteria	MBP8707994.1	GCA_018054005.1	Caldisericota	RM_Type_II__Type_II_MTases	904	defense-finder-models/RM/RM/RM_Type_II	UserReplicon_RM_Type_II_1	1	1	1	2	1	RM_Type_II__Type_II_MTases	mandatory	420	2.3e-100	332.8	0.992	0.779	71	397
Bacteria	MBP8707995.1	GCA_018054005.1	Caldisericota	RM_Type_II__Type_II_REases	905	defense-finder-models/RM/RM/RM_Type_II	UserReplicon_RM_Type_II_1	1	1	1	2	1	RM_Type_II__Type_II_REases	mandatory	232	3.4e-31	105.4	0.817	0.909	3	213
Bacteria	MBP8708026.1	GCA_018054005.1	Caldisericota	Cas__cas6_I_II_III_IV_V_VI_12	936	defense-finder-models/Cas/Cas/CAS_Class1-Subtype-I-B	UserReplicon_CAS_Class1-Subtype-I-B_2	1	1	0.75	6	1	Cas__cas6_I-B_III_1	accessory	194	1.3e-69	230.5	0.849	0.964	2	188
Bacteria	MBP8708027.1	GCA_018054005.1	Caldisericota	Cas__cas8b1_I-B_14	937	defense-finder-models/Cas/Cas/CAS_Class1-Subtype-I-B	UserReplicon_CAS_Class1-Subtype-I-B_2	1	1	0.75	6	1	Cas__cas8b2_I-B_2	mandatory	663	1.8e-37	125.6	0.81	0.793	1	526
Bacteria	MBP8708028.1	GCA_018054005.1	Caldisericota	Cas__cas7b_I-B_I-C_2	938	defense-finder-models/Cas/Cas/CAS_Class1-Subtype-I-B	UserReplicon_CAS_Class1-Subtype-I-B_2	1	1	0.75	6	1	Cas__cas7_I_15	accessory	372	3.7e-38	127.8	0.854	0.68	5	257
Bacteria	MBP8708029.1	GCA_018054005.1	Caldisericota	Cas__cas5_I-B_17	939	defense-finder-models/Cas/Cas/CAS_Class1-Subtype-I-B	UserReplicon_CAS_Class1-Subtype-I-B_2	1	1	0.75	6	1	Cas__cas5_I-B_6	mandatory	245	7.9e-23	77.7	0.905	0.922	1	226
Bacteria	MBP8708030.1	GCA_018054005.1	Caldisericota	Cas__cas3_I_5	940	defense-finder-models/Cas/Cas/CAS_Class1-Subtype-I-B	UserReplicon_CAS_Class1-Subtype-I-B_2	1	1	0.75	6	1	Cas__cas3_I_5	accessory	814	4.9e-41	137.2	0.507	0.483	288	680
Bacteria	MBP8708031.1	GCA_018054005.1	Caldisericota	Cas__cas1_I_II_III_IV_V_VI_10	941	defense-finder-models/Cas/Cas/CAS_Class1-Subtype-I-B	UserReplicon_CAS_Class1-Subtype-I-B_2	1	1	0.75	6	1	Cas__cas1_I_II_III_IV_V_VI_7	accessory	228	3.9e-65	216.2	0.774	0.987	4	228
Bacteria	MBP8708135.1	GCA_018054005.1	Caldisericota	RM_Type_II__Type_II_REases	1045	defense-finder-models/RM/RM/RM_Type_II	UserReplicon_RM_Type_II_2	1	1	1	2	2	RM_Type_II__Type_II_REases	mandatory	505	3.5e-78	260.2	1.992	0.996	1	503
Bacteria	MBP8708136.1	GCA_018054005.1	Caldisericota	RM_Type_II__Type_II_MTases	1046	defense-finder-models/RM/RM/RM_Type_II	UserReplicon_RM_Type_II_2	1	1	1	2	2	RM_Type_II__Type_II_MTases	mandatory	303	6.1e-67	222.7	0.814	0.98	7	303
Bacteria	MBP8708137.1	GCA_018054005.1	Caldisericota	RM_Type_II__Type_II_MTases	1047	defense-finder-models/RM/RM/RM_Type_II	UserReplicon_RM_Type_II_2	1	1	1	2	2	RM_Type_II__Type_II_MTases	mandatory	335	7.2e-122	403	0.88	0.976	7	333
Bacteria	MBP8708328.1	GCA_018054005.1	Caldisericota	RM_Type_II__Type_II_MTases	1238	defense-finder-models/RM/RM/RM_Type_II	UserReplicon_RM_Type_II_3	1	1	1	2	2	RM_Type_II__Type_II_MTases	mandatory	595	3.8e-109	361.7	0.973	0.588	3	352
Bacteria	MBP8708329.1	GCA_018054005.1	Caldisericota	RM_Type_II__Type_II_REases	1239	defense-finder-models/RM/RM/RM_Type_II	UserReplicon_RM_Type_II_3	1	1	1	2	2	RM_Type_II__Type_II_REases	mandatory	408	4.9e-53	177.4	1.55	0.988	5	407
Bacteria	MBP8708331.1	GCA_018054005.1	Caldisericota	RM_Type_II__Type_II_MTases	1241	defense-finder-models/RM/RM/RM_Type_II	UserReplicon_RM_Type_II_3	1	1	1	2	2	RM_Type_II__Type_II_MTases	mandatory	524	1.1e-75	251.5	0.68	0.481	69	320
Bacteria	MBP8708336.1	GCA_018054005.1	Caldisericota	RM_Type_II__Type_II_MTases	1246	defense-finder-models/RM/RM/RM_Type_II	UserReplicon_RM_Type_II_3	1	1	1	2	2	RM_Type_II__Type_II_MTases	mandatory	177	2.4e-12	42.7	0.238	0.565	2	101
Bacteria	MBP8708365.1	GCA_018054005.1	Caldisericota	Shedu__SduA	1275	defense-finder-models/DefenseFinder_1/Shedu/Shedu	UserReplicon_Shedu_2	1	1	1	1	1	Shedu__SduA	mandatory	358	1.2e-52	176.1	0.699	0.757	86	356
Bacteria	MBP8708366.1	GCA_018054005.1	Caldisericota	PD-T7-5__PD-T7-5	1276	defense-finder-models/DefenseFinder_4/PD-T7-5/PD-T7-5	UserReplicon_PD-T7-5_1	1	1	1	1	1	PD-T7-5__PD-T7-5	mandatory	307	3.4e-40	134.2	0.763	0.831	38	292
Bacteria	MBP8708400.1	GCA_018054005.1	Caldisericota	RM_Type_IIG__Type_IIG	1310	defense-finder-models/RM/RM/RM_Type_IIG	UserReplicon_RM_Type_IIG_5	1	1	1	1	1	RM_Type_IIG__Type_IIG	mandatory	1067	1.6e-116	387.2	0.864	0.948	56	1066
Bacteria	MBP8708439.1	GCA_018054005.1	Caldisericota	RM_Type_II__Type_II_REases	1349	defense-finder-models/RM/RM/RM_Type_II	UserReplicon_RM_Type_II_4	1	1	1	2	1	RM_Type_II__Type_II_REases	mandatory	357	1.3e-16	57.7	0.813	0.852	38	341
Bacteria	MBP8708440.1	GCA_018054005.1	Caldisericota	RM_Type_II__Type_II_MTases	1350	defense-finder-models/RM/RM/RM_Type_II	UserReplicon_RM_Type_II_4	1	1	1	2	1	RM_Type_II__Type_II_MTases	mandatory	286	1.6e-66	220.8	0.661	0.871	5	253
Bacteria	MBP8708471.1	GCA_018054005.1	Caldisericota	SoFic__SoFic	1381	defense-finder-models/DefenseFinder_5/SoFIC/SoFic	UserReplicon_SoFic_1	1	1	1	1	1	SoFic__SoFic	mandatory	382	2.8e-116	385	0.983	0.945	21	381
Bacteria	OIP12238.1	GCA_001871575.1	Caldisericota	RM_Type_IIG__Type_IIG	204	defense-finder-models/RM/RM/RM_Type_IIG	UserReplicon_RM_Type_IIG_1	1	1	1	1	1	RM_Type_IIG__Type_IIG	mandatory	1043	3.5e-220	730.2	1.204	0.976	16	1033
Bacteria	OIP12768.1	GCA_001871575.1	Caldisericota	SoFic__SoFic	480	defense-finder-models/DefenseFinder_5/SoFIC/SoFic	UserReplicon_SoFic_1	1	1	1	1	1	SoFic__SoFic	mandatory	375	1.9e-107	355.7	0.981	0.979	4	370
Bacteria	OIP13119.1	GCA_001871575.1	Caldisericota	AbiEii__AbiEii	684	defense-finder-models/DefenseFinder_1/AbiE/AbiE	UserReplicon_AbiE_1	1	1	1	2	1	AbiEii__AbiEii	mandatory	99	3.1e-12	43.1	0.268	0.657	7	71
Bacteria	OIP13121.1	GCA_001871575.1	Caldisericota	AbiEii__AbiEi_1	686	defense-finder-models/DefenseFinder_1/AbiE/AbiE	UserReplicon_AbiE_1	1	1	1	2	1	AbiEii__AbiEi_1	mandatory	254	1.1e-06	25	0.965	0.547	69	207
Bacteria	OIP13247.1	GCA_001871575.1	Caldisericota	RM_Type_IIG__Type_IIG	730	defense-finder-models/RM/RM/RM_Type_IIG	UserReplicon_RM_Type_IIG_2	1	1	1	1	1	RM_Type_IIG__Type_IIG	mandatory	860	1.7e-196	651.8	1.007	0.987	5	853
Bacteria	OIP13906.1	GCA_001871575.1	Caldisericota	Cas__cas6_I_II_III_IV_V_VI_10	1061	defense-finder-models/Cas/Cas/CAS_Class1-Subtype-I-B	UserReplicon_CAS_Class1-Subtype-I-B_1	1	1	1	8	1	Cas__cas6_I-B_III_1	accessory	261	1.1e-32	110.1	0.996	0.981	1	256
Bacteria	OIP13907.1	GCA_001871575.1	Caldisericota	Cas__cas8b1_I-B_14	1062	defense-finder-models/Cas/Cas/CAS_Class1-Subtype-I-B	UserReplicon_CAS_Class1-Subtype-I-B_1	1	1	1	8	1	Cas__cas8b2_I-B_2	mandatory	605	1.4e-145	482.4	0.998	0.969	1	586
Bacteria	OIP13908.1	GCA_001871575.1	Caldisericota	Cas__cas7_I-B_8	1063	defense-finder-models/Cas/Cas/CAS_Class1-Subtype-I-B	UserReplicon_CAS_Class1-Subtype-I-B_1	1	1	1	8	1	Cas__cas7_I-B_6	mandatory	325	7e-85	280.9	0.993	0.905	8	301
Bacteria	OIP13909.1	GCA_001871575.1	Caldisericota	Cas__cas5_I-B_17	1064	defense-finder-models/Cas/Cas/CAS_Class1-Subtype-I-B	UserReplicon_CAS_Class1-Subtype-I-B_1	1	1	1	8	1	Cas__cas5_I-B_6	mandatory	240	2.7e-43	144.4	0.905	0.942	1	226
Bacteria	OIP13910.1	GCA_001871575.1	Caldisericota	Cas__cas3_I_5	1065	defense-finder-models/Cas/Cas/CAS_Class1-Subtype-I-B	UserReplicon_CAS_Class1-Subtype-I-B_1	1	1	1	8	1	Cas__cas3_I_5	accessory	789	2.6e-53	177.5	0.684	0.673	208	738
Bacteria	OIP13911.1	GCA_001871575.1	Caldisericota	Cas__cas4_I_II_III_IV_V_VI_6	1066	defense-finder-models/Cas/Cas/CAS_Class1-Subtype-I-B	UserReplicon_CAS_Class1-Subtype-I-B_1	1	1	1	8	1	Cas__cas4_I_II_III_IV_V_VI_6	accessory	165	4.5e-52	172.5	1	0.97	6	165
Bacteria	OIP13912.1	GCA_001871575.1	Caldisericota	Cas__cas1_I_II_III_IV_V_VI_7	1067	defense-finder-models/Cas/Cas/CAS_Class1-Subtype-I-B	UserReplicon_CAS_Class1-Subtype-I-B_1	1	1	1	8	1	Cas__cas1_I_II_III_IV_V_VI_7	accessory	331	1.4e-137	454.3	0.994	0.976	5	327
Bacteria	OIP13913.1	GCA_001871575.1	Caldisericota	Cas__cas2_I_II_III_IV_V_VI_3	1068	defense-finder-models/Cas/Cas/CAS_Class1-Subtype-I-B	UserReplicon_CAS_Class1-Subtype-I-B_1	1	1	1	8	1	Cas__cas2_I_II_III_IV_V_VI_3	accessory	87	8.1e-29	95.8	1	0.897	3	80
Bacteria	OQB70498.1	GCA_002070635.1	Caldisericota	Lamassu-Fam__LmuB_SMC_Hydrolase_protease	129	defense-finder-models/DefenseFinder_1/Lamassu-Fam/Lamassu-Fam	UserReplicon_Lamassu-Fam_1	1	1	0.667	2	1	Lamassu-Fam__LmuB_SMC_Cap4_nuclease_II	mandatory	386	6.6e-07	24.2	0.297	0.782	5	306
Bacteria	OQB70543.1	GCA_002070635.1	Caldisericota	Lamassu-Fam__LmuA_effector_Protease	133	defense-finder-models/DefenseFinder_1/Lamassu-Fam/Lamassu-Fam	UserReplicon_Lamassu-Fam_1	1	1	0.667	2	1	Lamassu-Fam__LmuA_effector_Cap4_nuclease_II	mandatory	440	6.6e-11	38.4	0.376	0.35	161	314
Bacteria	OQB72770.1	GCA_002070635.1	Caldisericota	RM_Type_IV__Type_IV_REases	787	defense-finder-models/RM/RM/RM_Type_IV	UserReplicon_RM_Type_IV_1	1	1	1	1	1	RM_Type_IV__Type_IV_REases	mandatory	310	2e-60	201.4	0.385	0.545	137	305
Bacteria	OQB75033.1	GCA_002070635.1	Caldisericota	Cas__cas5_I-E_3	1354	defense-finder-models/Cas/Cas/CAS_Class1-Subtype-I-E	UserReplicon_CAS_Class1-Subtype-I-E_1	1	1	0.375	3	1	Cas__cas5_I-E_3	mandatory	261	1.2e-44	148.8	0.934	0.625	9	171
Bacteria	OQB75034.1	GCA_002070635.1	Caldisericota	Cas__cas7_I-E_16	1355	defense-finder-models/Cas/Cas/CAS_Class1-Subtype-I-E	UserReplicon_CAS_Class1-Subtype-I-E_1	1	1	0.375	3	1	Cas__cas7_I-E_16	mandatory	379	7.7e-112	370.7	0.944	0.934	3	356
Bacteria	OQB75035.1	GCA_002070635.1	Caldisericota	Cas__cse2gr11_I-E_8	1356	defense-finder-models/Cas/Cas/CAS_Class1-Subtype-I-E	UserReplicon_CAS_Class1-Subtype-I-E_1	1	1	0.375	3	1	Cas__cse2gr11_I-E_2	mandatory	191	8.6e-30	100.5	0.986	0.728	30	168
Bacteria	OQB75460.1	GCA_002070635.1	Caldisericota	RM_Type_IV__Type_IV_REases	1423	defense-finder-models/RM/RM/RM_Type_IV	UserReplicon_RM_Type_IV_2	1	1	1	1	1	RM_Type_IV__Type_IV_REases	mandatory	310	1.1e-60	202.2	0.385	0.545	137	305
Bacteria	PMP68052.1	GCA_002877955.1	Caldisericota	Cas__cas6_I_II_III_IV_V_VI_20	483	defense-finder-models/Cas/Cas/CAS_Class1-Subtype-I-B	UserReplicon_CAS_Class1-Subtype-I-B_1	1	1	1	8	1	Cas__cas6_I-B_III_1	accessory	260	1.1e-35	118.9	0.98	0.592	99	252
Bacteria	PMP68053.1	GCA_002877955.1	Caldisericota	Cas__cas8b1_I-B_14	484	defense-finder-models/Cas/Cas/CAS_Class1-Subtype-I-B	UserReplicon_CAS_Class1-Subtype-I-B_1	1	1	1	8	1	Cas__cas8b2_I-B_2	mandatory	594	6.3e-122	403.9	0.998	0.971	1	577
Bacteria	PMP68054.1	GCA_002877955.1	Caldisericota	Cas__cas7_I-B_8	485	defense-finder-models/Cas/Cas/CAS_Class1-Subtype-I-B	UserReplicon_CAS_Class1-Subtype-I-B_1	1	1	1	8	1	Cas__cas7_I-B_6	mandatory	321	1.7e-75	249.7	0.997	0.91	6	297
Bacteria	PMP68055.1	GCA_002877955.1	Caldisericota	Cas__cas5_I-B_17	486	defense-finder-models/Cas/Cas/CAS_Class1-Subtype-I-B	UserReplicon_CAS_Class1-Subtype-I-B_1	1	1	1	8	1	Cas__cas5_I-B_6	mandatory	238	1.6e-43	144.7	1	0.958	1	228
Bacteria	PMP68056.1	GCA_002877955.1	Caldisericota	Cas__cas3_I_5	487	defense-finder-models/Cas/Cas/CAS_Class1-Subtype-I-B	UserReplicon_CAS_Class1-Subtype-I-B_1	1	1	1	8	1	Cas__cas3_I_5	accessory	799	6.5e-51	169.2	0.591	0.533	275	700
Bacteria	PMP68057.1	GCA_002877955.1	Caldisericota	Cas__cas4_I_II_III_IV_V_VI_6	488	defense-finder-models/Cas/Cas/CAS_Class1-Subtype-I-B	UserReplicon_CAS_Class1-Subtype-I-B_1	1	1	1	8	1	Cas__cas4_I_II_III_IV_V_VI_6	accessory	167	1.9e-49	163.6	0.994	0.952	8	166
Bacteria	PMP68058.1	GCA_002877955.1	Caldisericota	Cas__cas1_I_II_III_IV_V_VI_7	489	defense-finder-models/Cas/Cas/CAS_Class1-Subtype-I-B	UserReplicon_CAS_Class1-Subtype-I-B_1	1	1	1	8	1	Cas__cas1_I_II_III_IV_V_VI_7	accessory	330	5.3e-134	442.1	0.994	0.976	5	326
Bacteria	PMP68059.1	GCA_002877955.1	Caldisericota	Cas__cas2_I_II_III_IV_V_VI_5	490	defense-finder-models/Cas/Cas/CAS_Class1-Subtype-I-B	UserReplicon_CAS_Class1-Subtype-I-B_1	1	1	1	8	1	Cas__cas2_I_II_III_IV_V_VI_3	accessory	87	3.7e-28	93.5	0.978	0.977	1	85
Bacteria	PMP68718.1	GCA_002877955.1	Caldisericota	RM_Type_IV__Type_IV_REases	757	defense-finder-models/RM/RM/RM_Type_IV	UserReplicon_RM_Type_IV_1	1	1	1	1	1	RM_Type_IV__Type_IV_REases	mandatory	300	6.3e-55	182.5	0.387	0.573	126	297
Bacteria	WP_119084853.1	GCF_003570995.1	Caldisericota	RM_Type_III__Type_III_REases	67	defense-finder-models/RM/RM/RM_Type_III	UserReplicon_RM_Type_III_5	1	1	1	2	1	RM_Type_III__Type_III_REases	mandatory	866	4.7e-47	157.5	0.434	0.525	69	523
Bacteria	WP_119084854.1	GCF_003570995.1	Caldisericota	RM_Type_III__Type_III_MTases	68	defense-finder-models/RM/RM/RM_Type_III	UserReplicon_RM_Type_III_5	1	1	1	2	1	RM_Type_III__Type_III_MTases	mandatory	651	1.7e-112	373.9	0.859	0.802	126	647
Bacteria	WP_119085102.1	GCF_003570995.1	Caldisericota	Cas__csb2gr5_I-G_1	259	defense-finder-models/Cas/Cas/CAS_Class1-Subtype-I-G	UserReplicon_CAS_Class1-Subtype-I-G_1	1	1	0.429	3	1	Cas__cas5u_I-G_1	mandatory	474	2.2e-50	168.8	0.982	0.994	1	471
Bacteria	WP_119085103.1	GCF_003570995.1	Caldisericota	Cas__csb1gr7_I-G_1	260	defense-finder-models/Cas/Cas/CAS_Class1-Subtype-I-G	UserReplicon_CAS_Class1-Subtype-I-G_1	1	1	0.429	3	1	Cas__cas7_I-G_4	mandatory	348	3.3e-46	154	0.988	0.48	15	181
Bacteria	WP_119085105.1	GCF_003570995.1	Caldisericota	Cas__cas3_I_2	261	defense-finder-models/Cas/Cas/CAS_Class1-Subtype-I-G	UserReplicon_CAS_Class1-Subtype-I-G_1	1	1	0.429	3	1	Cas__cas3_I_2	accessory	816	7.4e-39	130.6	0.963	0.469	35	417
Bacteria	WP_119085123.1	GCF_003570995.1	Caldisericota	RM__Type_I_MTases	273	defense-finder-models/RM/RM/RM_Type_I	UserReplicon_RM_Type_I_1	1	1	1	2.5	1	RM__Type_I_MTases	mandatory	595	2.5e-177	587.9	0.928	0.81	12	493
Bacteria	WP_119085124.1	GCF_003570995.1	Caldisericota	RM__Type_I_S	274	defense-finder-models/RM/RM/RM_Type_I	UserReplicon_RM_Type_I_1	1	1	1	2.5	1	RM__Type_I_S	accessory	439	1.5e-73	245.3	0.561	0.982	6	436
Bacteria	WP_119085125.1	GCF_003570995.1	Caldisericota	RM__Type_I_REases	275	defense-finder-models/RM/RM/RM_Type_I	UserReplicon_RM_Type_I_1	1	1	1	2.5	1	RM__Type_I_REases	mandatory	1028	4.2e-299	991.6	0.985	0.985	3	1015
Bacteria	WP_119085470.1	GCF_003570995.1	Caldisericota	RM_Type_IIG__Type_IIG	532	defense-finder-models/RM/RM/RM_Type_IIG	UserReplicon_RM_Type_IIG_4	1	1	1	1	1	RM_Type_IIG__Type_IIG	mandatory	1016	2.5e-151	502.9	0.988	0.99	6	1011
Bacteria	WP_119085782.1	GCF_003570995.1	Caldisericota	RM_Type_II__Type_II_MTases	756	defense-finder-models/RM/RM/RM_Type_II	UserReplicon_RM_Type_II_3	1	1	1	2	1	RM_Type_II__Type_II_MTases	mandatory	1185	4.5e-13	45.6	0.361	0.159	333	521
Bacteria	WP_119085788.1	GCF_003570995.1	Caldisericota	RM_Type_II__Type_II_REases	761	defense-finder-models/RM/RM/RM_Type_II	UserReplicon_RM_Type_II_3	1	1	1	2	1	RM_Type_II__Type_II_REases	mandatory	305	2.7e-11	40.3	0.615	0.515	148	304
Bacteria	WP_119086312.1	GCF_003570995.1	Caldisericota	RM_Type_IV__Type_IV_REases	1143	defense-finder-models/RM/RM/RM_Type_IV	UserReplicon_RM_Type_IV_6	1	1	1	1	1	RM_Type_IV__Type_IV_REases	mandatory	200	6.3e-20	69.1	0.28	0.61	54	175
Bacteria	WP_119086368.1	GCF_003570995.1	Caldisericota	RM__Type_I_MTases	1181	defense-finder-models/RM/RM/RM_Type_I	UserReplicon_RM_Type_I_2	1	1	1	2.5	1	RM__Type_I_MTases	mandatory	517	7.1e-153	507	0.984	0.988	3	513
Bacteria	WP_119086369.1	GCF_003570995.1	Caldisericota	RM__Type_I_S	1182	defense-finder-models/RM/RM/RM_Type_I	UserReplicon_RM_Type_I_2	1	1	1	2.5	1	RM__Type_I_S	accessory	418	2.7e-56	188.3	0.472	0.969	2	406
Bacteria	WP_119086371.1	GCF_003570995.1	Caldisericota	RM__Type_I_REases	1184	defense-finder-models/RM/RM/RM_Type_I	UserReplicon_RM_Type_I_2	1	1	1	2.5	1	RM__Type_I_REases	mandatory	1050	5e-176	584.6	0.983	0.957	7	1011
Bacteria	WP_119086539.1	GCF_003570995.1	Caldisericota	SanaTA__SanaA	1294	defense-finder-models/DefenseFinder_5/SanaTA/SanaTA	UserReplicon_SanaTA_1	1	1	1	2	1	SanaTA__SanaA	mandatory	207	4.1e-16	56.4	0.918	0.589	3	124
Bacteria	WP_119086540.1	GCF_003570995.1	Caldisericota	SanaTA__SanaT	1295	defense-finder-models/DefenseFinder_5/SanaTA/SanaTA	UserReplicon_SanaTA_1	1	1	1	2	1	SanaTA__SanaT	mandatory	343	3.8e-23	78.9	0.901	0.857	29	322
Bacteria	WP_119087010.1	GCF_003570935.1	Caldisericota	RM_Type_IV__Type_IV_REases	34	defense-finder-models/RM/RM/RM_Type_IV	UserReplicon_RM_Type_IV_7	1	1	1	1	1	RM_Type_IV__Type_IV_REases	mandatory	545	1.5e-41	139.4	0.822	0.721	137	529
Bacteria	WP_119087010.1	GCF_003570935.1	Caldisericota	RM_Type_IV__Type_IV_REases	229	defense-finder-models/RM/RM/RM_Type_IV	UserReplicon_RM_Type_IV_3	1	1	1	1	1	RM_Type_IV__Type_IV_REases	mandatory	545	1.4e-41	139.4	0.822	0.721	137	529
Bacteria	WP_119087999.1	GCF_003570985.1	Caldisericota	RM_Type_IV__Type_IV_REases	805	defense-finder-models/RM/RM/RM_Type_IV	UserReplicon_RM_Type_IV_4	1	1	1	1	1	RM_Type_IV__Type_IV_REases	mandatory	200	1.9e-20	70.7	0.28	0.61	54	175
Bacteria	WP_119088524.1	GCF_003570925.1	Caldisericota	RM_Type_IIG__Type_IIG	150	defense-finder-models/RM/RM/RM_Type_IIG	UserReplicon_RM_Type_IIG_2	1	1	1	1	1	RM_Type_IIG__Type_IIG	mandatory	1050	1.4e-213	708.6	1.199	0.965	24	1036
Bacteria	WP_119089377.1	GCF_003570925.1	Caldisericota	RM_Type_IV__Type_IV_REases	798	defense-finder-models/RM/RM/RM_Type_IV	UserReplicon_RM_Type_IV_3	1	1	1	1	1	RM_Type_IV__Type_IV_REases	mandatory	200	2e-19	66.9	0.283	0.63	50	175
Bacteria	WP_119089458.1	GCF_003570925.1	Caldisericota	RM__Type_I_REases	843	defense-finder-models/RM/RM/RM_Type_I	UserReplicon_RM_Type_I_1	1	1	0.667	2	1	RM__Type_I_REases	mandatory	1050	1.5e-175	582.6	0.985	0.959	7	1013
Bacteria	WP_119089461.1	GCF_003570925.1	Caldisericota	RM__Type_I_MTases	845	defense-finder-models/RM/RM/RM_Type_I	UserReplicon_RM_Type_I_1	1	1	0.667	2	1	RM__Type_I_MTases	mandatory	514	5.9e-150	496.8	0.984	0.992	3	512
Bacteria	WP_119090066.1	GCF_003570985.1	Caldisericota	RM_Type_IIG__Type_IIG	1273	defense-finder-models/RM/RM/RM_Type_IIG	UserReplicon_RM_Type_IIG_1	1	1	1	1	1	RM_Type_IIG__Type_IIG	mandatory	1058	1.3e-194	646.2	1.199	0.973	24	1052
Bacteria	WP_119090077.1	GCF_003570935.1	Caldisericota	RM_Type_IIG__Type_IIG	135	defense-finder-models/RM/RM/RM_Type_IIG	UserReplicon_RM_Type_IIG_3	1	1	1	1	1	RM_Type_IIG__Type_IIG	mandatory	1042	3.3e-215	714.5	1.187	0.959	24	1022
Bacteria	WP_119090077.1	GCF_003570935.1	Caldisericota	RM_Type_IIG__Type_IIG	1280	defense-finder-models/RM/RM/RM_Type_IIG	UserReplicon_RM_Type_IIG_2	1	1	1	1	1	RM_Type_IIG__Type_IIG	mandatory	1042	3e-215	714.5	1.187	0.959	24	1022
Bacteria	WP_119119629.1	GCF_003570935.1	Caldisericota	RM_Type_IIG__Type_IIG	536	defense-finder-models/RM/RM/RM_Type_IIG	UserReplicon_RM_Type_IIG_4	1	1	1	1	1	RM_Type_IIG__Type_IIG	mandatory	1022	5.7e-126	419	0.985	0.986	6	1013
Bacteria	WP_119120120.1	GCF_003570935.1	Caldisericota	RM__Type_I_MTases	877	defense-finder-models/RM/RM/RM_Type_I	UserReplicon_RM_Type_I_1	1	1	0.667	2	1	RM__Type_I_MTases	mandatory	597	9.4e-177	585.9	0.93	0.811	12	495
Bacteria	WP_119120121.1	GCF_003570935.1	Caldisericota	RM__Type_I_REases	878	defense-finder-models/RM/RM/RM_Type_I	UserReplicon_RM_Type_I_1	1	1	0.667	2	1	RM__Type_I_REases	mandatory	1016	2.6e-298	989	0.987	0.991	1	1007
Bacteria	WP_119120241.1	GCF_003570935.1	Caldisericota	SoFic__SoFic	963	defense-finder-models/DefenseFinder_5/SoFIC/SoFic	UserReplicon_SoFic_2	1	1	1	1	1	SoFic__SoFic	mandatory	360	3.7e-110	365.3	0.967	0.964	13	359
Bacteria	WP_119120289.1	GCF_003570935.1	Caldisericota	RM__Type_I_MTases	993	defense-finder-models/RM/RM/RM_Type_I	UserReplicon_RM_Type_I_2	1	1	1	2.5	1	RM__Type_I_MTases	mandatory	503	6.2e-128	424.2	0.953	0.972	13	501
Bacteria	WP_119120291.1	GCF_003570935.1	Caldisericota	RM__Type_I_S	995	defense-finder-models/RM/RM/RM_Type_I	UserReplicon_RM_Type_I_2	1	1	1	2.5	1	RM__Type_I_S	accessory	400	4.1e-64	214.2	0.539	0.975	11	400
Bacteria	WP_119120292.1	GCF_003570935.1	Caldisericota	RM__Type_I_REases	996	defense-finder-models/RM/RM/RM_Type_I	UserReplicon_RM_Type_I_2	1	1	1	2.5	1	RM__Type_I_REases	mandatory	787	3.8e-98	326.7	0.563	0.741	3	585
Bacteria	WP_119120442.1	GCF_003570935.1	Caldisericota	RM_Type_IIG__Type_IIG	1093	defense-finder-models/RM/RM/RM_Type_IIG	UserReplicon_RM_Type_IIG_5	1	1	1	1	1	RM_Type_IIG__Type_IIG	mandatory	1039	4.9e-207	687.4	1.166	0.949	24	1009
Bacteria	WP_119120476.1	GCF_003570935.1	Caldisericota	SanaTA__SanaA	1118	defense-finder-models/DefenseFinder_5/SanaTA/SanaTA	UserReplicon_SanaTA_1	1	1	1	2	1	SanaTA__SanaA	mandatory	207	8.2e-12	42.4	0.821	0.531	4	113
Bacteria	WP_119120477.1	GCF_003570935.1	Caldisericota	SanaTA__SanaT	1119	defense-finder-models/DefenseFinder_5/SanaTA/SanaTA	UserReplicon_SanaTA_1	1	1	1	2	1	SanaTA__SanaT	mandatory	335	2.2e-24	83	0.895	0.872	25	316
Bacteria	WP_119120581.1	GCF_003570935.1	Caldisericota	RM_Type_IIG__Type_IIG	1178	defense-finder-models/RM/RM/RM_Type_IIG	UserReplicon_RM_Type_IIG_6	1	1	1	1	1	RM_Type_IIG__Type_IIG	mandatory	689	1.3e-130	434.3	0.801	0.964	24	687
Bacteria	WP_207799111.1	GCF_003570935.1	Caldisericota	PsyrTA__PsyrT	1756	defense-finder-models/DefenseFinder_2/PsyrTA/PsyrTA	UserReplicon_PsyrTA_1	1	1	1	2	2	PsyrTA__PsyrT	mandatory	691	8.3e-271	896.8	0.987	0.987	5	686
Bacteria	WP_207799112.1	GCF_003570935.1	Caldisericota	PsyrTA__PsyrA	1757	defense-finder-models/DefenseFinder_2/PsyrTA/PsyrTA	UserReplicon_PsyrTA_1	1	1	1	2	2	PsyrTA__PsyrA	mandatory	194	7.6e-69	229.4	0.477	0.979	5	194
Bacteria	WP_207799113.1	GCF_003570935.1	Caldisericota	PsyrTA__PsyrA	1758	defense-finder-models/DefenseFinder_2/PsyrTA/PsyrTA	UserReplicon_PsyrTA_1	1	1	1	2	2	PsyrTA__PsyrA	mandatory	208	4.4e-49	164.3	0.354	0.736	1	153
Bacteria	WP_207799683.1	GCF_003570985.1	Caldisericota	PsyrTA__PsyrT	1653	defense-finder-models/DefenseFinder_2/PsyrTA/PsyrTA	UserReplicon_PsyrTA_1	1	1	1	2	1	PsyrTA__PsyrT	mandatory	691	6.6e-269	890.4	0.987	0.987	5	686
Bacteria	WP_207799684.1	GCF_003570985.1	Caldisericota	PsyrTA__PsyrA	1654	defense-finder-models/DefenseFinder_2/PsyrTA/PsyrTA	UserReplicon_PsyrTA_1	1	1	1	2	1	PsyrTA__PsyrA	mandatory	325	7.1e-107	354.5	0.648	0.825	3	270
Bacteria	HGY54545.1	GCA_011369465.1	Calditrichota	RM__Type_I_REases	488	defense-finder-models/RM/RM/RM_Type_I	UserReplicon_RM_Type_I_1	1	1	1	2.5	1	RM__Type_I_REases	mandatory	1129	2.3e-166	553.2	0.849	0.864	145	1119
Bacteria	HGY54547.1	GCA_011369465.1	Calditrichota	RM__Type_I_MTases	490	defense-finder-models/RM/RM/RM_Type_I	UserReplicon_RM_Type_I_1	1	1	1	2.5	1	RM__Type_I_MTases	mandatory	501	2e-177	588.2	0.955	1	1	501
Bacteria	HGY54549.1	GCA_011369465.1	Calditrichota	RM__Type_I_S	492	defense-finder-models/RM/RM/RM_Type_I	UserReplicon_RM_Type_I_1	1	1	1	2.5	1	RM__Type_I_S	accessory	258	6.2e-40	134.6	0.387	1	1	258
Bacteria	HGY54782.1	GCA_011369465.1	Calditrichota	RM_Type_II__Type_II_MTases	725	defense-finder-models/RM/RM/RM_Type_II	UserReplicon_RM_Type_II_2	1	1	1	2	1	RM_Type_II__Type_II_MTases	mandatory	320	2e-78	261.3	0.672	0.831	20	285
Bacteria	HGY54783.1	GCA_011369465.1	Calditrichota	RM_Type_II__Type_II_REases	726	defense-finder-models/RM/RM/RM_Type_II	UserReplicon_RM_Type_II_2	1	1	1	2	1	RM_Type_II__Type_II_REases	mandatory	204	7.2e-09	33.3	0.412	0.598	61	182
Bacteria	HGY55358.1	GCA_011369465.1	Calditrichota	Cas__cas3_I_5	1301	defense-finder-models/Cas/Cas/CAS_Class1-Subtype-I-C	UserReplicon_CAS_Class1-Subtype-I-C_1	1	1	1	7	1	Cas__cas3_I_5	accessory	755	9.4e-60	200.3	0.551	0.544	174	584
Bacteria	HGY55359.1	GCA_011369465.1	Calditrichota	Cas__cas5_I-C_11	1302	defense-finder-models/Cas/Cas/CAS_Class1-Subtype-I-C	UserReplicon_CAS_Class1-Subtype-I-C_1	1	1	1	7	1	Cas__cas5_I-C_11	mandatory	218	2.5e-82	273.2	1	0.94	5	209
Bacteria	HGY55360.1	GCA_011369465.1	Calditrichota	Cas__cas8c_I-C_2	1303	defense-finder-models/Cas/Cas/CAS_Class1-Subtype-I-C	UserReplicon_CAS_Class1-Subtype-I-C_1	1	1	1	7	1	Cas__cas8c_I-C_4	mandatory	594	3.8e-148	492.1	1	0.973	3	580
Bacteria	HGY55361.1	GCA_011369465.1	Calditrichota	Cas__cas7_I-C_7	1304	defense-finder-models/Cas/Cas/CAS_Class1-Subtype-I-C	UserReplicon_CAS_Class1-Subtype-I-C_1	1	1	1	7	1	Cas__cas7_I-C_13	mandatory	286	1.1e-112	373.5	0.996	0.972	7	284
Bacteria	HGY55362.1	GCA_011369465.1	Calditrichota	Cas__cas4_I_II_III_IV_V_VI_6	1305	defense-finder-models/Cas/Cas/CAS_Class1-Subtype-I-C	UserReplicon_CAS_Class1-Subtype-I-C_1	1	1	1	7	1	Cas__cas4_I_II_III_IV_V_VI_1	accessory	221	9.6e-40	134	0.994	0.86	11	200
Bacteria	HGY55363.1	GCA_011369465.1	Calditrichota	Cas__cas1_I_II_III_IV_V_VI_6	1306	defense-finder-models/Cas/Cas/CAS_Class1-Subtype-I-C	UserReplicon_CAS_Class1-Subtype-I-C_1	1	1	1	7	1	Cas__cas1_I_II_III_IV_V_VI_6	accessory	343	5.8e-154	509.9	1	0.985	4	341
Bacteria	HGY55364.1	GCA_011369465.1	Calditrichota	Cas__cas2_I_II_III_IV_V_VI_3	1307	defense-finder-models/Cas/Cas/CAS_Class1-Subtype-I-C	UserReplicon_CAS_Class1-Subtype-I-C_1	1	1	1	7	1	Cas__cas2_I_II_III_IV_V_VI_3	accessory	96	9.9e-28	93.8	0.987	0.865	3	85
Bacteria	HGY55480.1	GCA_011369465.1	Calditrichota	SoFic__SoFic	1423	defense-finder-models/DefenseFinder_5/SoFIC/SoFic	UserReplicon_SoFic_1	1	1	1	1	1	SoFic__SoFic	mandatory	372	2.2e-118	393.2	0.981	0.965	14	372
Bacteria	HGY55557.1	GCA_011369465.1	Calditrichota	SoFic__SoFic	1500	defense-finder-models/DefenseFinder_5/SoFIC/SoFic	UserReplicon_SoFic_2	1	1	1	1	1	SoFic__SoFic	mandatory	365	3.1e-113	376.3	0.97	0.984	2	360
Bacteria	HGY55906.1	GCA_011369465.1	Calditrichota	AbiEii__AbiEi_4	1849	defense-finder-models/DefenseFinder_1/AbiE/AbiE	UserReplicon_AbiE_1	1	1	1	2	1	AbiEii__AbiEi_1	mandatory	204	3.9e-08	31	0.959	0.23	6	52
Bacteria	HGY55907.1	GCA_011369465.1	Calditrichota	AbiEii__AbiEii	1850	defense-finder-models/DefenseFinder_1/AbiE/AbiE	UserReplicon_AbiE_1	1	1	1	2	1	AbiEii__AbiEii	mandatory	304	1.2e-36	124.6	0.992	0.766	39	271
Bacteria	HGY56618.1	GCA_011369465.1	Calditrichota	RM_Type_II__Type_II_MTases	2561	defense-finder-models/RM/RM/RM_Type_II	UserReplicon_RM_Type_II_3	1	1	1	2	1	RM_Type_II__Type_II_MTases	mandatory	297	2.1e-49	165.9	0.724	0.919	12	284
Bacteria	HGY56619.1	GCA_011369465.1	Calditrichota	RM_Type_II__Type_II_REases	2562	defense-finder-models/RM/RM/RM_Type_II	UserReplicon_RM_Type_II_3	1	1	1	2	1	RM_Type_II__Type_II_REases	mandatory	227	3.7e-29	100	1.05	0.978	6	227
Bacteria	MBD3223196.1	GCA_014730185.1	Calditrichota	Thoeris__ThsB_Global	117	defense-finder-models/DefenseFinder_3/Thoeris/Thoeris_I	UserReplicon_Thoeris_I_1	1	1	1	2	1	Thoeris__ThsB_Global	mandatory	147	6.7e-26	89	0.746	0.98	1	144
Bacteria	MBD3223197.1	GCA_014730185.1	Calditrichota	Thoeris_I__ThsA_new_grand	118	defense-finder-models/DefenseFinder_3/Thoeris/Thoeris_I	UserReplicon_Thoeris_I_1	1	1	1	2	1	Thoeris_I__ThsA_new_grand	mandatory	479	1.7e-171	568.6	0.994	0.99	1	474
Bacteria	MBD3223578.1	GCA_014730185.1	Calditrichota	AbiZ__AbiZ	499	defense-finder-models/DefenseFinder_1/AbiZ/AbiZ	UserReplicon_AbiZ_1	1	1	1	1	1	AbiZ__AbiZ	mandatory	90	4.3e-06	23.8	0.185	0.867	8	85
Bacteria	MBN1407170.1	GCA_016928315.1	Calditrichota	AVAST_IV__Avs4A	1037	defense-finder-models/DefenseFinder_2/AVAST/AVAST_IV	UserReplicon_AVAST_IV_1	1	1	1	1	1	AVAST_IV__Avs4A	mandatory	403	8.9e-82	272.5	0.258	0.988	2	399
Bacteria	MBN1408238.1	GCA_016928315.1	Calditrichota	DarTG__DarG	2105	defense-finder-models/DefenseFinder_2/DarTG/DarTG	UserReplicon_DarTG_2	1	1	1	2	1	DarTG__DarG	mandatory	371	1.1e-20	71.9	0.59	0.358	4	136
Bacteria	MBN1408239.1	GCA_016928315.1	Calditrichota	DarTG__DarT	2106	defense-finder-models/DefenseFinder_2/DarTG/DarTG	UserReplicon_DarTG_2	1	1	1	2	1	DarTG__DarT	mandatory	193	2.2e-38	129.5	1	0.964	8	193
Bacteria	MBN1408835.1	GCA_016928315.1	Calditrichota	SoFic__SoFic	2702	defense-finder-models/DefenseFinder_5/SoFIC/SoFic	UserReplicon_SoFic_1	1	1	1	1	1	SoFic__SoFic	mandatory	381	8.8e-117	387.8	0.983	0.95	16	377
Bacteria	MBN1409127.1	GCA_016928315.1	Calditrichota	Lamassu-Fam__LmuA_effector_Cap4_nuclease	2994	defense-finder-models/DefenseFinder_1/Lamassu-Fam/Lamassu-Fam	UserReplicon_Lamassu-Fam_1	1	1	0.667	2	1	Lamassu-Fam__LmuA_effector_Cap4_nuclease_II	mandatory	358	3.7e-60	201.7	0.976	0.98	5	355
Bacteria	MBN1409128.1	GCA_016928315.1	Calditrichota	Lamassu-Fam__LmuB_SMC_Cap4_nuclease	2995	defense-finder-models/DefenseFinder_1/Lamassu-Fam/Lamassu-Fam	UserReplicon_Lamassu-Fam_1	1	1	0.667	2	1	Lamassu-Fam__LmuB_SMC_Cap4_nuclease_II	mandatory	396	1.6e-98	328	0.687	0.985	1	390
Bacteria	MBN2365185.1	GCA_016934605.1	Calditrichota	Zorya_TypeI__ZorD	670	defense-finder-models/DefenseFinder_4/Zorya/Zorya_TypeI	UserReplicon_Zorya_TypeI_1	1	1	1	4	1	Zorya_TypeI__ZorD	mandatory	955	1.2e-141	471.1	0.609	0.673	305	947
Bacteria	MBN2365186.1	GCA_016934605.1	Calditrichota	Zorya_TypeI__ZorC	671	defense-finder-models/DefenseFinder_4/Zorya/Zorya_TypeI	UserReplicon_Zorya_TypeI_1	1	1	1	4	1	Zorya_TypeI__ZorC	mandatory	431	6.6e-09	32.5	0.344	0.432	244	429
Bacteria	MBN2365187.1	GCA_016934605.1	Calditrichota	Zorya__ZorB	672	defense-finder-models/DefenseFinder_4/Zorya/Zorya_TypeI	UserReplicon_Zorya_TypeI_1	1	1	1	4	1	Zorya__ZorB	mandatory	239	7.2e-19	65.5	0.842	0.904	17	232
Bacteria	MBN2365188.1	GCA_016934605.1	Calditrichota	Zorya__ZorA	673	defense-finder-models/DefenseFinder_4/Zorya/Zorya_TypeI	UserReplicon_Zorya_TypeI_1	1	1	1	4	1	Zorya__ZorA	mandatory	513	4.7e-14	49.4	0.313	0.421	111	326
Bacteria	MBN2365871.1	GCA_016934605.1	Calditrichota	SoFic__SoFic	1356	defense-finder-models/DefenseFinder_5/SoFIC/SoFic	UserReplicon_SoFic_1	1	1	1	1	1	SoFic__SoFic	mandatory	219	2.2e-77	258.1	0.59	0.973	6	218
Bacteria	MBN2367037.1	GCA_016934605.1	Calditrichota	RM__Type_I_MTases	2522	defense-finder-models/RM/RM/RM_Type_I	UserReplicon_RM_Type_I_1	1	1	1	2.5	1	RM__Type_I_MTases	mandatory	860	9.7e-164	543.4	0.986	0.978	2	842
Bacteria	MBN2367039.1	GCA_016934605.1	Calditrichota	RM__Type_I_S	2524	defense-finder-models/RM/RM/RM_Type_I	UserReplicon_RM_Type_I_1	1	1	1	2.5	1	RM__Type_I_S	accessory	421	3.1e-60	201.3	0.563	0.986	5	419
Bacteria	MBN2367042.1	GCA_016934605.1	Calditrichota	RM__Type_I_REases	2527	defense-finder-models/RM/RM/RM_Type_I	UserReplicon_RM_Type_I_1	1	1	1	2.5	1	RM__Type_I_REases	mandatory	1050	7.8e-153	508.4	0.952	0.926	1	972
Bacteria	NOG46204.1	GCA_013112635.1	Calditrichota	SoFic__SoFic	2620	defense-finder-models/DefenseFinder_5/SoFIC/SoFic	UserReplicon_SoFic_3	1	1	1	1	1	SoFic__SoFic	mandatory	377	1.1e-117	391.3	0.981	0.955	17	376
Bacteria	NOG46277.1	GCA_013112635.1	Calditrichota	AbiV__AbiV	2693	defense-finder-models/DefenseFinder_1/AbiV/AbiV	UserReplicon_AbiV_2	1	1	1	1	1	AbiV__AbiV	mandatory	144	2.2e-09	35.4	0.572	0.785	32	144
Bacteria	NOG46320.1	GCA_013112635.1	Calditrichota	RM_Type_II__Type_II_REases	2736	defense-finder-models/RM/RM/RM_Type_II	UserReplicon_RM_Type_II_1	1	1	1	2	1	RM_Type_II__Type_II_REases	mandatory	253	2.9e-24	84.4	0.95	0.984	2	250
Bacteria	NOG46321.1	GCA_013112635.1	Calditrichota	RM_Type_II__Type_II_MTases	2737	defense-finder-models/RM/RM/RM_Type_II	UserReplicon_RM_Type_II_1	1	1	1	2	1	RM_Type_II__Type_II_MTases	mandatory	419	1.2e-96	322.1	0.986	0.8	69	403
Bacteria	NOG46502.1	GCA_013112635.1	Calditrichota	AbiH__AbiH	2918	defense-finder-models/DefenseFinder_1/AbiH/AbiH	UserReplicon_AbiH_1	1	1	1	1	1	AbiH__AbiH	mandatory	330	2.1e-39	134	0.973	0.785	4	262
Bacteria	NOG46966.1	GCA_013112635.1	Calditrichota	BREX__brxA_DUF1819	3382	defense-finder-models/DefenseFinder_5/BREX/BREX_I	UserReplicon_BREX_I_2	1	1	1	4	1	BREX__brxA_DUF1819	accessory	210	1e-32	111.4	0.918	0.786	8	172
Bacteria	NOG46967.1	GCA_013112635.1	Calditrichota	BREX__brxB_DUF1788	3383	defense-finder-models/DefenseFinder_5/BREX/BREX_I	UserReplicon_BREX_I_2	1	1	1	4	1	BREX__brxB_DUF1788	accessory	200	3.5e-23	80	0.968	0.66	63	194
Bacteria	NOG46968.1	GCA_013112635.1	Calditrichota	BREX__brxC	3384	defense-finder-models/DefenseFinder_5/BREX/BREX_I	UserReplicon_BREX_I_2	1	1	1	4	1	BREX__brxC	accessory	1159	1.2e-220	733.8	0.965	0.997	1	1156
Bacteria	NOG46969.1	GCA_013112635.1	Calditrichota	BREX__pglX1	3385	defense-finder-models/DefenseFinder_5/BREX/BREX_I	UserReplicon_BREX_I_2	1	1	1	4	1	BREX__pglX1	accessory	1177	0	1231.3	0.9	0.998	1	1175
Bacteria	NOG46971.1	GCA_013112635.1	Calditrichota	BREX__pglZA	3387	defense-finder-models/DefenseFinder_5/BREX/BREX_I	UserReplicon_BREX_I_2	1	1	1	4	1	BREX__pglZB	mandatory	845	5.1e-168	559.2	0.991	0.998	3	845
Bacteria	NOG46972.1	GCA_013112635.1	Calditrichota	BREX__brxL	3388	defense-finder-models/DefenseFinder_5/BREX/BREX_I	UserReplicon_BREX_I_2	1	1	1	4	1	BREX__brxL	mandatory	667	9.1e-264	875.2	0.827	0.997	2	666
Bacteria	NOG47503.1	GCA_013112635.1	Calditrichota	SoFic__SoFic	3919	defense-finder-models/DefenseFinder_5/SoFIC/SoFic	UserReplicon_SoFic_4	1	1	1	1	1	SoFic__SoFic	mandatory	364	2.4e-113	377	0.978	0.995	1	362
Bacteria	NOG47807.1	GCA_013112635.1	Calditrichota	RM_Type_IIG__Type_IIG	4223	defense-finder-models/RM/RM/RM_Type_IIG	UserReplicon_RM_Type_IIG_2	1	1	1	1	1	RM_Type_IIG__Type_IIG	mandatory	1257	4.8e-94	314.4	0.791	0.776	192	1166
Bacteria	NOG47990.1	GCA_013112635.1	Calditrichota	Shedu__SduA	4406	defense-finder-models/DefenseFinder_1/Shedu/Shedu	UserReplicon_Shedu_3	1	1	1	1	1	Shedu__SduA	mandatory	209	8.2e-35	119	0.492	0.842	7	182
Bacteria	NOX36042.1	GCA_013150955.1	Calditrichota	Cas__cas6_I_II_III_IV_V_VI_17	144	defense-finder-models/Cas/Cas/CAS_Class1-Subtype-III-B	UserReplicon_CAS_Class1-Subtype-III-B_2	1	1	1	7	1	Cas__cas6_I_II_III_IV_V_VI_17	accessory	208	1.1e-64	216.1	0.661	0.99	2	207
Bacteria	NOX36043.1	GCA_013150955.1	Calditrichota	Cas__cmr1gr7_III-B_1	145	defense-finder-models/Cas/Cas/CAS_Class1-Subtype-III-B	UserReplicon_CAS_Class1-Subtype-III-B_2	1	1	1	7	1	Cas__cmr1gr7_III-B_1	mandatory	454	6.5e-32	108.5	0.842	0.716	3	327
Bacteria	NOX36045.1	GCA_013150955.1	Calditrichota	Cas__cas10_III_1	147	defense-finder-models/Cas/Cas/CAS_Class1-Subtype-III-B	UserReplicon_CAS_Class1-Subtype-III-B_2	1	1	1	7	1	Cas__cas10_III_1	accessory	1007	9.7e-108	358.6	0.996	0.66	207	871
Bacteria	NOX36046.1	GCA_013150955.1	Calditrichota	Cas__cmr3gr5_III-B_III-C_5	148	defense-finder-models/Cas/Cas/CAS_Class1-Subtype-III-B	UserReplicon_CAS_Class1-Subtype-III-B_2	1	1	1	7	1	Cas__cmr3gr5_III-B_III-C_5	accessory	385	4.3e-55	185	0.989	0.964	6	376
Bacteria	NOX36047.1	GCA_013150955.1	Calditrichota	Cas__cmr4gr7_III-B_III-C_2	149	defense-finder-models/Cas/Cas/CAS_Class1-Subtype-III-B	UserReplicon_CAS_Class1-Subtype-III-B_2	1	1	1	7	1	Cas__cmr4gr7_III-B_III-C_2	accessory	336	4.8e-73	243.7	0.987	0.979	7	335
Bacteria	NOX36048.1	GCA_013150955.1	Calditrichota	Cas__cmr5gr11_III-B_18	150	defense-finder-models/Cas/Cas/CAS_Class1-Subtype-III-B	UserReplicon_CAS_Class1-Subtype-III-B_2	1	1	1	7	1	Cas__cmr5gr11_III-B_18	mandatory	118	3.2e-33	112	1	0.932	8	117
Bacteria	NOX36049.1	GCA_013150955.1	Calditrichota	Cas__cmr6gr7_III-B_3	151	defense-finder-models/Cas/Cas/CAS_Class1-Subtype-III-B	UserReplicon_CAS_Class1-Subtype-III-B_2	1	1	1	7	1	Cas__cmr6gr7_III-B_1	mandatory	359	2.7e-51	172.1	0.953	0.643	23	253
Bacteria	NOX36261.1	GCA_013150955.1	Calditrichota	AbiEii__AbiEi_3	363	defense-finder-models/DefenseFinder_1/AbiE/AbiE	UserReplicon_AbiE_1	1	1	1	2	1	AbiEii__AbiEi_1	mandatory	249	2.2e-54	180.9	0.987	0.606	94	244
Bacteria	NOX36262.1	GCA_013150955.1	Calditrichota	AbiEii__AbiEii	364	defense-finder-models/DefenseFinder_1/AbiE/AbiE	UserReplicon_AbiE_1	1	1	1	2	1	AbiEii__AbiEii	mandatory	306	5.6e-39	132	0.962	0.824	13	264
Bacteria	NOX36276.1	GCA_013150955.1	Calditrichota	dGTPase__Sp_dGTPase	378	defense-finder-models/DefenseFinder_1/dGTPase/dGTPase	UserReplicon_dGTPase_2	1	1	1	1	1	dGTPase__Sp_dGTPase	mandatory	422	8.3e-60	200.2	0.357	0.377	17	175
Bacteria	NOX36857.1	GCA_013150955.1	Calditrichota	Cas__cas4_I_II_III_IV_V_VI_6	959	defense-finder-models/Cas/Cas/CAS_Class1-Subtype-I-B	UserReplicon_CAS_Class1-Subtype-I-B_1	1	1	0.75	6	1	Cas__cas4_I_II_III_IV_V_VI_6	accessory	171	5.6e-53	176.8	0.994	0.93	12	170
Bacteria	NOX36858.1	GCA_013150955.1	Calditrichota	Cas__cas3_I_5	960	defense-finder-models/Cas/Cas/CAS_Class1-Subtype-I-B	UserReplicon_CAS_Class1-Subtype-I-B_1	1	1	0.75	6	1	Cas__cas3_I_5	accessory	781	3.1e-55	185.2	0.65	0.603	265	735
Bacteria	NOX36859.1	GCA_013150955.1	Calditrichota	Cas__cas5_I-B_17	961	defense-finder-models/Cas/Cas/CAS_Class1-Subtype-I-B	UserReplicon_CAS_Class1-Subtype-I-B_1	1	1	0.75	6	1	Cas__cas5_I-B_6	mandatory	246	8.3e-42	140.9	0.921	0.947	1	233
Bacteria	NOX36860.1	GCA_013150955.1	Calditrichota	Cas__cas7_I-B_8	962	defense-finder-models/Cas/Cas/CAS_Class1-Subtype-I-B	UserReplicon_CAS_Class1-Subtype-I-B_1	1	1	0.75	6	1	Cas__cas7_I-B_6	mandatory	303	2.3e-90	300.2	0.997	0.911	8	283
Bacteria	NOX36861.1	GCA_013150955.1	Calditrichota	Cas__cas8b1_I-B_14	963	defense-finder-models/Cas/Cas/CAS_Class1-Subtype-I-B	UserReplicon_CAS_Class1-Subtype-I-B_1	1	1	0.75	6	1	Cas__cas8b2_I-B_2	mandatory	597	1.2e-131	437.7	0.998	0.956	1	571
Bacteria	NOX36862.1	GCA_013150955.1	Calditrichota	Cas__cas6_I_II_III_IV_V_VI_14	964	defense-finder-models/Cas/Cas/CAS_Class1-Subtype-I-B	UserReplicon_CAS_Class1-Subtype-I-B_1	1	1	0.75	6	1	Cas__cas6_I-B_III_1	accessory	247	6.8e-43	144.8	0.975	0.992	1	245
Bacteria	NOX37247.1	GCA_013150955.1	Calditrichota	Cas__RT_I_II_III_IV_V_VI_1	1349	defense-finder-models/Cas/Cas/CAS_Class1-Subtype-III-D	UserReplicon_CAS_Class1-Subtype-III-D_3	1	1	0.625	5	1	Cas__RT_I_II_III_IV_V_VI_1	neutral	535	1.8e-61	205.1	0.791	0.439	301	535
Bacteria	NOX37248.1	GCA_013150955.1	Calditrichota	Cas__cas1_I_II_III_IV_V_VI_1	1350	defense-finder-models/Cas/Cas/CAS_Class1-Subtype-III-D	UserReplicon_CAS_Class1-Subtype-III-D_3	1	1	0.625	5	1	Cas__cas1_I_II_III_IV_V_VI_10	accessory	423	2.4e-73	244.4	0.994	0.749	95	411
Bacteria	NOX37249.1	GCA_013150955.1	Calditrichota	Cas__cas2_I_II_III_IV_V_VI_3	1351	defense-finder-models/Cas/Cas/CAS_Class1-Subtype-III-D	UserReplicon_CAS_Class1-Subtype-III-D_3	1	1	0.625	5	1	Cas__cas2_I_II_III_IV_V_VI_5	accessory	94	3.6e-24	82.3	0.911	0.777	3	75
Bacteria	NOX37250.1	GCA_013150955.1	Calditrichota	Cas__cas10_III-D_3	1352	defense-finder-models/Cas/Cas/CAS_Class1-Subtype-III-D	UserReplicon_CAS_Class1-Subtype-III-D_3	1	1	0.625	5	1	Cas__cas10_III-D_1	mandatory	565	4.2e-73	244.1	0.993	0.834	2	472
Bacteria	NOX37251.1	GCA_013150955.1	Calditrichota	Cas__csm3gr7_III_1	1353	defense-finder-models/Cas/Cas/CAS_Class1-Subtype-III-D	UserReplicon_CAS_Class1-Subtype-III-D_3	1	1	0.625	5	1	Cas__csm3gr7_III-A_III-D_10	accessory	211	1.6e-25	88.1	0.994	0.886	10	196
Bacteria	NOX37252.1	GCA_013150955.1	Calditrichota	Cas__csx10gr5_III-D_3	1354	defense-finder-models/Cas/Cas/CAS_Class1-Subtype-III-D	UserReplicon_CAS_Class1-Subtype-III-D_3	1	1	0.625	5	1	Cas__csx10gr5_III-D_3	mandatory	351	1.2e-33	114.3	0.822	0.983	6	350
Bacteria	NOX87436.1	GCA_013151275.1	Calditrichota	AbiEii__AbiEii	55	defense-finder-models/DefenseFinder_1/AbiE/AbiE	UserReplicon_AbiE_1	1	1	1	2	1	AbiEii__AbiEii	mandatory	307	2e-40	136.9	0.958	0.853	22	283
Bacteria	NOX87437.1	GCA_013151275.1	Calditrichota	AbiEii__AbiEi_3	56	defense-finder-models/DefenseFinder_1/AbiE/AbiE	UserReplicon_AbiE_1	1	1	1	2	1	AbiEii__AbiEi_1	mandatory	249	2.9e-54	180.7	0.994	0.61	93	244
Bacteria	NOX87661.1	GCA_013151275.1	Calditrichota	AbiEii__AbiEii	280	defense-finder-models/DefenseFinder_1/AbiE/AbiE	UserReplicon_AbiE_2	1	1	1	2	1	AbiEii__AbiEii	mandatory	291	3.9e-39	132.7	0.937	0.766	39	261
Bacteria	NOX87662.1	GCA_013151275.1	Calditrichota	AbiEii__AbiEi_4	281	defense-finder-models/DefenseFinder_1/AbiE/AbiE	UserReplicon_AbiE_2	1	1	1	2	1	AbiEii__AbiEi_1	mandatory	200	9.9e-10	36.1	0.939	0.225	9	53
Bacteria	NOX87990.1	GCA_013151275.1	Calditrichota	SoFic__SoFic	609	defense-finder-models/DefenseFinder_5/SoFIC/SoFic	UserReplicon_SoFic_1	1	1	1	1	1	SoFic__SoFic	mandatory	376	1.5e-120	400.4	0.981	0.957	16	375
Bacteria	NOX88564.1	GCA_013151275.1	Calditrichota	PsyrTA__PsyrA	1183	defense-finder-models/DefenseFinder_2/PsyrTA/PsyrTA	UserReplicon_PsyrTA_1	1	1	1	2	1	PsyrTA__PsyrA	mandatory	370	1.3e-79	265.7	0.764	0.822	5	308
Bacteria	NOX88565.1	GCA_013151275.1	Calditrichota	PsyrTA__PsyrT	1184	defense-finder-models/DefenseFinder_2/PsyrTA/PsyrTA	UserReplicon_PsyrTA_1	1	1	1	2	1	PsyrTA__PsyrT	mandatory	671	1.1e-269	894	0.997	0.996	2	669
Bacteria	NOX89311.1	GCA_013151275.1	Calditrichota	RM_Type_II__Type_II_REases	1930	defense-finder-models/RM/RM/RM_Type_II	UserReplicon_RM_Type_II_1	1	1	1	2	1	RM_Type_II__Type_II_REases	mandatory	286	3.3e-49	166.2	0.832	0.801	56	284
Bacteria	NOX89312.1	GCA_013151275.1	Calditrichota	RM_Type_II__Type_II_MTases	1931	defense-finder-models/RM/RM/RM_Type_II	UserReplicon_RM_Type_II_1	1	1	1	2	1	RM_Type_II__Type_II_MTases	mandatory	401	4.4e-32	109.2	0.628	0.586	162	396
Bacteria	NUQ40633.1	GCA_013360445.1	Calditrichota	RM__Type_I_REases	881	defense-finder-models/RM/RM/RM_Type_I	UserReplicon_RM_Type_I_1	1	1	1	2.5	1	RM__Type_I_REases	mandatory	1014	2.3e-129	431	0.942	0.947	6	965
Bacteria	NUQ40634.1	GCA_013360445.1	Calditrichota	RM__Type_I_S	882	defense-finder-models/RM/RM/RM_Type_I	UserReplicon_RM_Type_I_1	1	1	1	2.5	1	RM__Type_I_S	accessory	439	1.9e-92	309	0.547	0.973	7	433
Bacteria	NUQ40635.1	GCA_013360445.1	Calditrichota	RM__Type_I_MTases	883	defense-finder-models/RM/RM/RM_Type_I	UserReplicon_RM_Type_I_1	1	1	1	2.5	1	RM__Type_I_MTases	mandatory	690	7.5e-158	524.7	1.283	0.978	11	685
Bacteria	NUQ42492.1	GCA_013360445.1	Calditrichota	RM_Type_II__Type_II_REases	2740	defense-finder-models/RM/RM/RM_Type_II	UserReplicon_RM_Type_II_3	1	1	1	2	1	RM_Type_II__Type_II_REases	mandatory	309	2.4e-69	232.5	1.095	0.994	2	308
Bacteria	NUQ42493.1	GCA_013360445.1	Calditrichota	RM_Type_II__Type_II_MTases	2741	defense-finder-models/RM/RM/RM_Type_II	UserReplicon_RM_Type_II_3	1	1	1	2	1	RM_Type_II__Type_II_MTases	mandatory	519	2.8e-175	582	1.344	0.961	18	516
Bacteria	NUQ42520.1	GCA_013360445.1	Calditrichota	RM_Type_II__Type_II_REases	2768	defense-finder-models/RM/RM/RM_Type_II	UserReplicon_RM_Type_II_4	1	1	1	2	1	RM_Type_II__Type_II_REases	mandatory	340	2.3e-53	179.9	1.065	0.959	7	332
Bacteria	NUQ42521.1	GCA_013360445.1	Calditrichota	RM_Type_II__Type_II_MTases	2769	defense-finder-models/RM/RM/RM_Type_II	UserReplicon_RM_Type_II_4	1	1	1	2	1	RM_Type_II__Type_II_MTases	mandatory	600	8.4e-58	194.1	0.678	0.43	233	490
Bacteria	NUQ42541.1	GCA_013360445.1	Calditrichota	RM_Type_III__Type_III_MTases	2789	defense-finder-models/RM/RM/RM_Type_III	UserReplicon_RM_Type_III_7	1	1	1	2	1	RM_Type_III__Type_III_MTases	mandatory	633	9.4e-112	373.1	0.677	0.648	114	523
Bacteria	NUQ42544.1	GCA_013360445.1	Calditrichota	RM_Type_III__Type_III_REases	2792	defense-finder-models/RM/RM/RM_Type_III	UserReplicon_RM_Type_III_7	1	1	1	2	1	RM_Type_III__Type_III_REases	mandatory	860	5.3e-60	201.6	0.836	0.915	60	846
Bacteria	NUQ42692.1	GCA_013360445.1	Calditrichota	SoFic__SoFic	2940	defense-finder-models/DefenseFinder_5/SoFIC/SoFic	UserReplicon_SoFic_2	1	1	1	1	1	SoFic__SoFic	mandatory	392	7.4e-116	385.3	0.975	0.929	26	389
Bacteria	NUQ42831.1	GCA_013360445.1	Calditrichota	Septu__PtuA	3079	defense-finder-models/DefenseFinder_2/Septu/Septu	UserReplicon_Septu_1	1	1	1	2	1	Septu__PtuA	mandatory	643	1.5e-55	187.8	0.924	0.638	219	628
Bacteria	NUQ42832.1	GCA_013360445.1	Calditrichota	Septu__PtuB	3080	defense-finder-models/DefenseFinder_2/Septu/Septu	UserReplicon_Septu_1	1	1	1	2	1	Septu__PtuB	mandatory	196	1.9e-34	117.9	0.762	0.878	1	172
Bacteria	NUQ43057.1	GCA_013360445.1	Calditrichota	BREX__pglX1	3305	defense-finder-models/DefenseFinder_5/BREX/BREX_I	UserReplicon_BREX_I_1	1	1	0.5	2.5	1	BREX__pglX1	accessory	1150	0	1442.4	0.903	0.998	1	1148
Bacteria	NUQ43059.1	GCA_013360445.1	Calditrichota	BREX__pglZA	3307	defense-finder-models/DefenseFinder_5/BREX/BREX_I	UserReplicon_BREX_I_1	1	1	0.5	2.5	1	BREX__pglZB	mandatory	829	7.9e-275	912.6	0.995	0.996	2	827
Bacteria	NUQ43060.1	GCA_013360445.1	Calditrichota	BREX__brxL	3308	defense-finder-models/DefenseFinder_5/BREX/BREX_I	UserReplicon_BREX_I_1	1	1	0.5	2.5	1	BREX__brxL	mandatory	675	7.5e-227	753.2	0.648	0.745	2	504
Bacteria	NUQ43071.1	GCA_013360445.1	Calditrichota	Cas__cas10_III-D_3	3319	defense-finder-models/Cas/Cas/CAS_Class1-Type-III	UserReplicon_CAS_Class1-Type-III_4	1	1	0.2	4	1	Cas__cas10_III_1	mandatory	547	2.2e-57	192.9	0.937	0.748	8	416
Bacteria	NUQ43072.1	GCA_013360445.1	Calditrichota	Cas__csm3gr7_III-A_III-D_10	3320	defense-finder-models/Cas/Cas/CAS_Class1-Type-III	UserReplicon_CAS_Class1-Type-III_4	1	1	0.2	4	1	Cas__csm3gr7_III-A_1	mandatory	250	4.3e-20	70.3	0.801	0.832	15	222
Bacteria	NUQ43073.1	GCA_013360445.1	Calditrichota	Cas__csx10gr5_III-D_2	3321	defense-finder-models/Cas/Cas/CAS_Class1-Type-III	UserReplicon_CAS_Class1-Type-III_4	1	1	0.2	4	1	Cas__csm4gr5_III-A_3	mandatory	381	1.6e-45	154.2	0.992	0.979	7	379
Bacteria	NUQ43076.1	GCA_013360445.1	Calditrichota	Cas__csm3gr7_III-A_III-D_2	3324	defense-finder-models/Cas/Cas/CAS_Class1-Type-III	UserReplicon_CAS_Class1-Type-III_4	1	1	0.2	4	1	Cas__csm3gr7_III-A_1	mandatory	314	3.8e-37	126	0.981	0.809	13	266
Bacteria	NUQ43077.1	GCA_013360445.1	Calditrichota	Cas__csm3gr7_III-A_III-D_2	3325	defense-finder-models/Cas/Cas/CAS_Class1-Type-III	UserReplicon_CAS_Class1-Type-III_4	1	1	0.2	4	1	Cas__csm3gr7_III-A_1	mandatory	320	3.9e-34	116.2	0.958	0.659	13	223
Bacteria	NUQ43079.1	GCA_013360445.1	Calditrichota	Cas__csm3gr7_III_IV	3327	defense-finder-models/Cas/Cas/CAS_Class1-Type-III	UserReplicon_CAS_Class1-Type-III_4	1	1	0.2	4	1	Cas__csm3gr7_III_IV	accessory	495	7.7e-21	73.4	0.99	0.497	35	280
Bacteria	NUQ43081.1	GCA_013360445.1	Calditrichota	Cas__csx15_I_III_1	3329	defense-finder-models/Cas/Cas/CAS_Class1-Type-III	UserReplicon_CAS_Class1-Type-III_4	1	1	0.2	4	1	Cas__csx15_I_III_1	neutral	179	5.3e-35	117.3	0.98	0.553	81	179
Bacteria	NUQ43083.1	GCA_013360445.1	Calditrichota	Cas__cmr6gr7_III-B_2	3331	defense-finder-models/Cas/Cas/CAS_Class1-Type-III	UserReplicon_CAS_Class1-Type-III_4	1	1	0.2	4	1	Cas__csm3gr7_III-A_1	mandatory	501	2.5e-39	133.3	0.908	0.581	71	361
Bacteria	NUQ43164.1	GCA_013360445.1	Calditrichota	RM_Type_II__Type_II_REases	3412	defense-finder-models/RM/RM/RM_Type_II	UserReplicon_RM_Type_II_5	1	1	1	2	1	RM_Type_II__Type_II_REases	mandatory	336	3.7e-11	41.1	0.435	0.333	172	283
Bacteria	NUQ43165.1	GCA_013360445.1	Calditrichota	RM_Type_II__Type_II_MTases	3413	defense-finder-models/RM/RM/RM_Type_II	UserReplicon_RM_Type_II_5	1	1	1	2	1	RM_Type_II__Type_II_MTases	mandatory	318	3e-127	422	0.779	0.887	24	305
Bacteria	NUQ43217.1	GCA_013360445.1	Calditrichota	RM_Type_II__Type_II_MTases	3465	defense-finder-models/RM/RM/RM_Type_II	UserReplicon_RM_Type_II_6	1	1	1	2	1	RM_Type_II__Type_II_MTases	mandatory	407	9.8e-77	256.7	0.978	0.975	2	398
Bacteria	NUQ43218.1	GCA_013360445.1	Calditrichota	RM_Type_II__Type_II_REases	3466	defense-finder-models/RM/RM/RM_Type_II	UserReplicon_RM_Type_II_6	1	1	1	2	1	RM_Type_II__Type_II_REases	mandatory	768	2.1e-15	55.3	0.782	0.315	3	244
Bacteria	NUQ43868.1	GCA_013360445.1	Calditrichota	RM__Type_I_S	4116	defense-finder-models/RM/RM/RM_Type_I	UserReplicon_RM_Type_I_2	1	1	1	2.5	1	RM__Type_I_S	accessory	381	1.5e-30	104.6	0.542	0.992	4	381
Bacteria	NUQ43869.1	GCA_013360445.1	Calditrichota	RM__Type_I_MTases	4117	defense-finder-models/RM/RM/RM_Type_I	UserReplicon_RM_Type_I_2	1	1	1	2.5	1	RM__Type_I_MTases	mandatory	521	5.2e-174	577.4	0.953	0.967	13	516
Bacteria	NUQ43871.1	GCA_013360445.1	Calditrichota	RM__Type_I_REases	4119	defense-finder-models/RM/RM/RM_Type_I	UserReplicon_RM_Type_I_2	1	1	1	2.5	1	RM__Type_I_REases	mandatory	789	4.3e-154	513	0.575	0.715	4	567
Bacteria	NUQ43876.1	GCA_013360445.1	Calditrichota	Lamassu-Fam__LmuB_SMC_Cap4_nuclease	4124	defense-finder-models/DefenseFinder_1/Lamassu-Fam/Lamassu-Fam	UserReplicon_Lamassu-Fam_1	1	1	0.667	2	1	Lamassu-Fam__LmuB_SMC_Cap4_nuclease_II	mandatory	235	4.4e-06	23.4	0.264	0.638	17	166
Bacteria	NUQ43879.1	GCA_013360445.1	Calditrichota	Lamassu-Fam__LmuA_effector_Hydrolase	4127	defense-finder-models/DefenseFinder_1/Lamassu-Fam/Lamassu-Fam	UserReplicon_Lamassu-Fam_1	1	1	0.667	2	1	Lamassu-Fam__LmuA_effector_Cap4_nuclease_II	mandatory	809	3e-10	37.7	0.278	0.114	690	781
Bacteria	NUQ43910.1	GCA_013360445.1	Calditrichota	Cas__csx1_III_10	4158	defense-finder-models/Cas/Cas/CAS_Class1-Subtype-III-A	UserReplicon_CAS_Class1-Subtype-III-A_1	1	1	0.778	7	1	Cas__csx1_III_10	accessory	549	2.2e-47	159.5	0.909	0.377	7	213
Bacteria	NUQ43911.1	GCA_013360445.1	Calditrichota	Cas__cas6_I_II_III_IV_V_VI_17	4159	defense-finder-models/Cas/Cas/CAS_Class1-Subtype-III-A	UserReplicon_CAS_Class1-Subtype-III-A_1	1	1	0.778	7	1	Cas__cas6_I_II_III_IV_V_VI_15	accessory	300	2e-96	321	0.969	0.997	1	299
Bacteria	NUQ43912.1	GCA_013360445.1	Calditrichota	Cas__cas10_III-A_1	4160	defense-finder-models/Cas/Cas/CAS_Class1-Subtype-III-A	UserReplicon_CAS_Class1-Subtype-III-A_1	1	1	0.778	7	1	Cas__cas10_III-A_1	mandatory	890	3.8e-150	499.6	0.998	0.826	11	745
Bacteria	NUQ43913.1	GCA_013360445.1	Calditrichota	Cas__csm2gr11_III-A_15	4161	defense-finder-models/Cas/Cas/CAS_Class1-Subtype-III-A	UserReplicon_CAS_Class1-Subtype-III-A_1	1	1	0.778	7	1	Cas__csm2gr11_III-A_15	mandatory	160	1.3e-19	69.3	0.936	0.688	44	153
Bacteria	NUQ43914.1	GCA_013360445.1	Calditrichota	Cas__csm3gr7_III-A_1	4162	defense-finder-models/Cas/Cas/CAS_Class1-Subtype-III-A	UserReplicon_CAS_Class1-Subtype-III-A_1	1	1	0.778	7	1	Cas__csm3gr7_III-A_1	mandatory	225	7.7e-71	236.4	0.967	0.951	6	219
Bacteria	NUQ43915.1	GCA_013360445.1	Calditrichota	Cas__csm4gr5_III-A_2	4163	defense-finder-models/Cas/Cas/CAS_Class1-Subtype-III-A	UserReplicon_CAS_Class1-Subtype-III-A_1	1	1	0.778	7	1	Cas__csm4gr5_III-A_2	mandatory	340	1e-73	246.4	0.994	0.991	1	337
Bacteria	NUQ43916.1	GCA_013360445.1	Calditrichota	Cas__csm5gr7_III-A_2	4164	defense-finder-models/Cas/Cas/CAS_Class1-Subtype-III-A	UserReplicon_CAS_Class1-Subtype-III-A_1	1	1	0.778	7	1	Cas__csm5gr7_III-A_2	mandatory	347	1.5e-14	52.1	0.518	0.533	11	195
Bacteria	NUQ43917.1	GCA_013360445.1	Calditrichota	Cas__csx1_III_9	4165	defense-finder-models/Cas/Cas/CAS_Class1-Subtype-III-A	UserReplicon_CAS_Class1-Subtype-III-A_1	1	1	0.778	7	1	Cas__csx1_III_10	accessory	463	1.5e-76	256	1	0.732	4	342
Bacteria	NUQ43919.1	GCA_013360445.1	Calditrichota	Cas__csx1_III_10	4167	defense-finder-models/Cas/Cas/CAS_Class1-Subtype-III-A	UserReplicon_CAS_Class1-Subtype-III-A_1	1	1	0.778	7	1	Cas__csx1_III_10	accessory	373	2.9e-56	188.6	0.991	0.601	5	228
Bacteria	NUQ43924.1	GCA_013360445.1	Calditrichota	Cas__cas1_I_II_III_IV_V_VI_1	4172	defense-finder-models/Cas/Cas/CAS_Cluster	UserReplicon_CAS_Cluster_8	1	1	0.04	2	1	Cas__cas1_I_II_III_IV_V_VI_1	mandatory	324	1.4e-89	298.4	1	0.966	1	313
Bacteria	NUQ43925.1	GCA_013360445.1	Calditrichota	Cas__cas2_I_II_III_IV_V_VI_3	4173	defense-finder-models/Cas/Cas/CAS_Cluster	UserReplicon_CAS_Cluster_8	1	1	0.04	2	1	Cas__cas2_I_II_III_IV_V_VI_1	mandatory	101	1.2e-27	94	0.987	0.772	13	90
Bacteria	OPX31631.1	GCA_002049825.1	Calditrichota	RM_Type_II__Type_II_REases	113	defense-finder-models/RM/RM/RM_Type_II	UserReplicon_RM_Type_II_1	1	1	1	2	1	RM_Type_II__Type_II_REases	mandatory	232	3.4e-26	89.3	1	0.914	15	226
Bacteria	OPX31637.1	GCA_002049825.1	Calditrichota	RM_Type_II__Type_II_MTases	119	defense-finder-models/RM/RM/RM_Type_II	UserReplicon_RM_Type_II_1	1	1	1	2	1	RM_Type_II__Type_II_MTases	mandatory	313	4.7e-54	180.1	0.719	0.863	14	283
Bacteria	OPX32933.1	GCA_002049825.1	Calditrichota	RM_Type_II__Type_II_MTases	438	defense-finder-models/RM/RM/RM_Type_II	UserReplicon_RM_Type_II_2	1	1	1	2	1	RM_Type_II__Type_II_MTases	mandatory	477	9.8e-129	426.7	1.199	0.964	15	474
Bacteria	OPX32934.1	GCA_002049825.1	Calditrichota	RM_Type_II__Type_II_REases	439	defense-finder-models/RM/RM/RM_Type_II	UserReplicon_RM_Type_II_2	1	1	1	2	1	RM_Type_II__Type_II_REases	mandatory	322	2.5e-19	66.8	0.771	0.736	62	298
Bacteria	OPX34632.1	GCA_002049825.1	Calditrichota	AbiEii__AbiEi_1	1083	defense-finder-models/DefenseFinder_1/AbiE/AbiE	UserReplicon_AbiE_1	1	1	1	2	1	AbiEii__AbiEi_1	mandatory	266	3.9e-32	108.1	0.993	0.541	70	213
Bacteria	OPX34633.1	GCA_002049825.1	Calditrichota	AbiEii__AbiEii	1084	defense-finder-models/DefenseFinder_1/AbiE/AbiE	UserReplicon_AbiE_1	1	1	1	2	1	AbiEii__AbiEii	mandatory	262	6.3e-31	104.8	0.883	0.744	32	226
Bacteria	OPX35876.1	GCA_002049825.1	Calditrichota	RM_Type_II__Type_II_MTases	1646	defense-finder-models/RM/RM/RM_Type_II	UserReplicon_RM_Type_II_3	1	1	1	2	1	RM_Type_II__Type_II_MTases	mandatory	610	1.7e-168	558.4	1.522	0.926	31	595
Bacteria	OPX35877.1	GCA_002049825.1	Calditrichota	RM_Type_II__Type_II_REases	1647	defense-finder-models/RM/RM/RM_Type_II	UserReplicon_RM_Type_II_3	1	1	1	2	1	RM_Type_II__Type_II_REases	mandatory	365	9.9e-54	179.7	1.107	0.959	11	360
Bacteria	OPX35915.1	GCA_002049825.1	Calditrichota	RM_Type_IV__Type_IV_REases	1675	defense-finder-models/RM/RM/RM_Type_IV	UserReplicon_RM_Type_IV_4	1	1	1	1	1	RM_Type_IV__Type_IV_REases	mandatory	288	2.2e-35	119	0.321	0.479	140	277
Bacteria	RMF54667.1	GCA_003695285.1	Calditrichota	Cas__cas1_I_II_III_IV_V_VI_10	87	defense-finder-models/Cas/Cas/CAS_Cluster	UserReplicon_CAS_Cluster_9	1	1	0.06	3	1	Cas__cas1_I_II_III_IV_V_VI_1	mandatory	331	5.4e-84	279.3	1	0.87	3	290
Bacteria	RMF54668.1	GCA_003695285.1	Calditrichota	Cas__cas2_I_II_III_IV_V_VI_3	88	defense-finder-models/Cas/Cas/CAS_Cluster	UserReplicon_CAS_Cluster_9	1	1	0.06	3	1	Cas__cas2_I_II_III_IV_V_VI_1	mandatory	96	4.6e-25	85.2	0.975	0.812	3	80
Bacteria	RMF54669.1	GCA_003695285.1	Calditrichota	Cas__cas4_I_II_III_IV_V_VI_1	89	defense-finder-models/Cas/Cas/CAS_Cluster	UserReplicon_CAS_Cluster_9	1	1	0.06	3	1	Cas__cas4_I_II_III_IV_V_VI_1	mandatory	197	5.3e-36	122	0.994	0.964	8	197
Bacteria	RMF57016.1	GCA_003695285.1	Calditrichota	Cas__cas13a_VI-A_1	872	defense-finder-models/Cas/Cas/CAS_Class2-Subtype-VI-A	UserReplicon_CAS_Class2-Subtype-VI-A_7	1	1	0.333	1	1	Cas__cas13a_VI-A_1	mandatory	303	0.0007	17.4	0.412	0.228	21	89
Bacteria	RMF57108.1	GCA_003695285.1	Calditrichota	dGTPase__Sp_dGTPase	918	defense-finder-models/DefenseFinder_1/dGTPase/dGTPase	UserReplicon_dGTPase_1	1	1	1	1	1	dGTPase__Sp_dGTPase	mandatory	426	4.9e-60	201.1	0.372	0.39	17	182
Bacteria	RMF57272.1	GCA_003695285.1	Calditrichota	SoFic__SoFic	1002	defense-finder-models/DefenseFinder_5/SoFIC/SoFic	UserReplicon_SoFic_1	1	1	1	1	1	SoFic__SoFic	mandatory	387	4.6e-123	408.5	0.986	0.943	18	382
Bacteria	RMF58540.1	GCA_003695285.1	Calditrichota	RM_Type_II__Type_II_MTases	1607	defense-finder-models/RM/RM/RM_Type_II	UserReplicon_RM_Type_II_1	1	1	1	2	2	RM_Type_II__Type_II_MTases	mandatory	539	3.9e-66	221.3	0.973	0.961	3	520
Bacteria	RMF58541.1	GCA_003695285.1	Calditrichota	RM_Type_II__Type_II_REases	1608	defense-finder-models/RM/RM/RM_Type_II	UserReplicon_RM_Type_II_1	1	1	1	2	2	RM_Type_II__Type_II_REases	mandatory	920	1.7e-177	589.7	2.851	0.942	46	912
Bacteria	RMF58545.1	GCA_003695285.1	Calditrichota	RM_Type_II__Type_II_REases	1612	defense-finder-models/RM/RM/RM_Type_II	UserReplicon_RM_Type_II_1	1	1	1	2	2	RM_Type_II__Type_II_REases	mandatory	490	2.3e-18	64.5	0.939	0.653	5	324
Bacteria	RMF58776.1	GCA_003695285.1	Calditrichota	Cas__cas2_I_II_III_IV_V_VI_13	1713	defense-finder-models/Cas/Cas/CAS_Class1-Subtype-III-B	UserReplicon_CAS_Class1-Subtype-III-B_2	1	1	0.714	5	1	Cas__cas2_I_II_III_IV_V_VI_3	accessory	93	6.5e-22	75.1	1	0.763	1	71
Bacteria	RMF58777.1	GCA_003695285.1	Calditrichota	Cas__csx15_I_III_1	1714	defense-finder-models/Cas/Cas/CAS_Class1-Subtype-III-B	UserReplicon_CAS_Class1-Subtype-III-B_2	1	1	0.714	5	1	Cas__csx15_I_III_1	neutral	129	1.6e-37	124.9	0.99	0.775	27	126
Bacteria	RMF58778.1	GCA_003695285.1	Calditrichota	Cas__cmr6gr7_III-B_3	1715	defense-finder-models/Cas/Cas/CAS_Class1-Subtype-III-B	UserReplicon_CAS_Class1-Subtype-III-B_2	1	1	0.714	5	1	Cas__cmr6gr7_III-B_1	mandatory	395	8.2e-54	180.5	0.969	0.671	130	394
Bacteria	RMF58779.1	GCA_003695285.1	Calditrichota	Cas__cmr5gr11_III-B_18	1716	defense-finder-models/Cas/Cas/CAS_Class1-Subtype-III-B	UserReplicon_CAS_Class1-Subtype-III-B_2	1	1	0.714	5	1	Cas__cmr5gr11_III-B_18	mandatory	147	1.8e-34	116.2	1	0.871	11	138
Bacteria	RMF58780.1	GCA_003695285.1	Calditrichota	Cas__cmr4gr7_III-B_III-C_2	1717	defense-finder-models/Cas/Cas/CAS_Class1-Subtype-III-B	UserReplicon_CAS_Class1-Subtype-III-B_2	1	1	0.714	5	1	Cas__cmr4gr7_III-B_III-C_2	accessory	317	6.7e-72	240	0.987	0.972	6	313
Bacteria	RMF58781.1	GCA_003695285.1	Calditrichota	Cas__csm6_III_3	1718	defense-finder-models/Cas/Cas/CAS_Class1-Subtype-III-B	UserReplicon_CAS_Class1-Subtype-III-B_2	1	1	0.714	5	1	Cas__csm6_III_3	accessory	397	2e-33	112.9	0.821	0.383	18	169
[truncated: 42,094 more rows]

## Sheet: DS_Systems
Group	sys_id	Genome	Taxonomy	type	subtype	sys_beg	sys_end	protein_in_syst	genes_count	name_of_profiles_in_sys
[truncated: 18,108 more rows]

## Sheet: Stats
Defense Systems distribuition statistics
[truncated: 165 more rows]
